# Supplementary material
Source: PubMed Central journal article supplement (PMC3643141)
Supplement: NIHMS458357-supplement-SI.pdf [file NIHMS458357-supplement-SI.pdf]

# Direct Synthesis of Fluorinated Heteroarylether Bioisosteres

Qianghui Zhou,<sup>1</sup> Alessandro Ruffoni,<sup>1</sup> Ryan Gianatassio,<sup>1</sup> Yuta Fujiwara,<sup>1</sup> Eran Sella,<sup>2</sup>  
Doron Shabat<sup>2</sup> and Phil S. Baran\*<sup>1</sup>

<sup>1</sup>*Department of Chemistry, The Scripps Research Institute, 10550 N. Torrey Pines Rd, La  
Jolla, CA, USA, 92037*

<sup>2</sup>*School of Chemistry, Faculty of Exact Sciences, Tel-Aviv University, Tel-Aviv, Israel,  
69978*

## SUPPORTING INFORMATION – PROCEDURES

### Table of Contents

|                                                              |      |       |
|--------------------------------------------------------------|------|-------|
| General Experimental .....                                   | page | SI-3  |
| Optimization of Difluoroethylation on Caffeine.....          | page | SI-3  |
| Difluoroethylation of Heterocycles: Standard Procedure ..... | page | SI-5  |
| Experimental Procedures for Compounds <b>7</b> to <b>44</b>  |      |       |
| Compound <b>7</b> .....                                      | page | SI-5  |
| Compound <b>8</b> .....                                      | page | SI-6  |
| Compound <b>9</b> .....                                      | page | SI-7  |
| Compound <b>11</b> .....                                     | page | SI-8  |
| Compound <b>12</b> .....                                     | page | SI-9  |
| Compound <b>13</b> .....                                     | page | SI-9  |
| Compound <b>14</b> .....                                     | page | SI-10 |
| Compound <b>15</b> .....                                     | page | SI-11 |
| Compound <b>16</b> .....                                     | page | SI-12 |
| Compound <b>17</b> .....                                     | page | SI-13 |
| Compound <b>18</b> .....                                     | page | SI-13 |
| Compound <b>19</b> .....                                     | page | SI-14 |
| Compound <b>20</b> .....                                     | page | SI-14 |
| Compound <b>21</b> .....                                     | page | SI-15 |
| Compound <b>22</b> .....                                     | page | SI-15 |
| Compound <b>23</b> .....                                     | page | SI-16 |
| Compound <b>24</b> .....                                     | page | SI-16 |
| Compound <b>25</b> .....                                     | page | SI-17 |
| Compound <b>26</b> .....                                     | page | SI-17 |
| Compound <b>27</b> .....                                     | page | SI-18 |
| Compound <b>28</b> .....                                     | page | SI-18 |
| Compound <b>29</b> .....                                     | page | SI-19 |
| Compound <b>30</b> .....                                     | page | SI-19 |
| Compound <b>31</b> .....                                     | page | SI-20 |
| Compound <b>32</b> .....                                     | page | SI-20 |

|                                                                                         |       |           |
|-----------------------------------------------------------------------------------------|-------|-----------|
| Compound <b>33</b> .....                                                                | page  | SI-21     |
| Compound <b>34</b> .....                                                                | page  | SI-21     |
| Compound <b>35</b> .....                                                                | page  | SI-22     |
| Compound <b>37</b> .....                                                                | page  | SI-22     |
| Compound <b>38</b> .....                                                                | page  | SI-23     |
| Compound <b>39</b> .....                                                                | page  | SI-24     |
| Compound <b>40</b> .....                                                                | page  | SI-25     |
| Compound <b>41</b> .....                                                                | page  | SI-25     |
| Compound <b>42</b> .....                                                                | page  | SI-25     |
| Compound <b>43</b> .....                                                                | page  | SI-26     |
| QM analysis for anisole .....                                                           | page  | SI-28     |
| QM analysis for difluoroethylbenzene.....                                               | page  | SI-28     |
| QM electrostatic potential surfaces of anisole and difluoroethylbenzene ....            | page  | SI-29     |
| <sup>1</sup> H, <sup>13</sup> C, and <sup>19</sup> F NMR Spectra of all compounds ..... | pages | SI-30-149 |

**General Experimental** Reagents were purchased at the highest commercial quality and used without further purification, unless otherwise stated. Yields refer to chromatographically and spectroscopically ( $^1\text{H-NMR}$ ) homogeneous material, unless otherwise stated. Reactions were monitored by thin layer chromatography (TLC) carried out on 0.25 mm E. Merck silica plates (60F-254), using UV light as the visualizing agent and  $\text{KMnO}_4$  or acidic solution of *p*-anisaldehyde and heat as a developing agent. Flash silica gel chromatography was performed using E. Merck silica gel (60, particle size 0.043–0.063 mm). Preparative HPLC was performed using a Waters Atlantis  $\text{dC}_{18}$  OBD 10 mm column with dimension 30 x 250 mm, unless otherwise noted. NMR spectra were recorded on Bruker DRX-600, DRX-500, AMX-400, and Varian INOVA-399 instruments and were calibrated using residual undeuterated solvent as an internal reference ( $\text{CHCl}_3$  @ 7.26 ppm  $^1\text{H}$  NMR, 77.16 ppm  $^{13}\text{C}$  NMR;  $\text{CH}_3\text{OH}$  @ 3.31 ppm  $^1\text{H}$  NMR, 49.0 ppm  $^{13}\text{C}$  NMR;  $\text{CH}_3\text{CN}$  1.94 ppm  $^1\text{H}$  NMR, 1.32 ppm  $^{13}\text{C}$  NMR). The following abbreviations were used to explain multiplicities: s = singlet, d = doublet, t = triplet, q = quartet, sept= septet, m = multiplet, br = broad. Gas chromatography was performed on an Agilent Technologies 7890A instrument using a 30 meter DB-5 column with an internal diameter of 0.250 mm; reaction species were calibrated against tetradecane as an internal standard. In situ reaction calorimetry was performed using an Omnical Insight-CPR-220 calorimeter. High resolution mass spectra (HRMS) were recorded on an Agilent LC/MSD TOF mass spectrometer by electrospray ionization time-off-flight reflectron experiments. IR experiments were recorded on a Perkin-Elmer Spectrum BX FTIR spectrometer. Melting points were recorded on a Fisher-Johns 12-144 melting point apparatus and are uncorrected.

### Optimization of Difluoroethylation on Caffeine

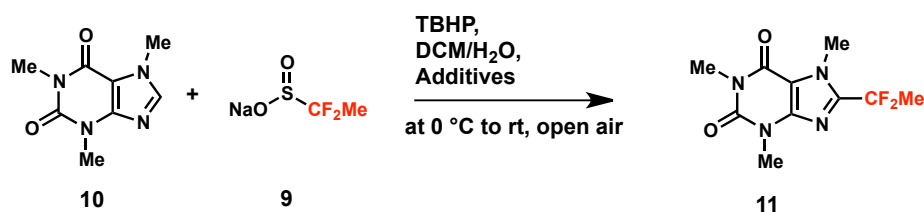

To a solution of caffeine (**10**) (10 mg, 0.05 mmol, 1.0 equiv), sodium difluoroethanesulfinate (DFES-Na) (**9**) (23.0 mg, 0.15 mmol, 3.0 equiv) and Zn salt (0.075 mmol, 1.5 equiv) in DCM (0.2 mL) and H<sub>2</sub>O (0.08 mL) was added Brønsted acid (0.05 mmol, 1.0 equiv). The reaction mixture was cooled in ice and TBHP (70% solution in water, 0.035 mL, 0.25 mmol, 5.0 equiv) was added dropwise with vigorous stirring and the stirring was continued at this temperature for 5 min. The reaction was warmed to room temperature and monitored by TLC until completion (24 h). Upon consumption of starting material, the reaction was partitioned between DCM (1.0 mL) and saturated aqueous NaHCO<sub>3</sub> (1.0 mL). The organic layer was separated, and the aqueous layer was extracted with DCM (3 × 1.0 mL). The combined organic layers were dried over Na<sub>2</sub>SO<sub>4</sub>, concentrated in vacuum and NMR analysis of the crude reaction mixture was performed. Then the mixture was purified by column chromatography. The results are listed in Table 1.

Table 1 Optimization of the reaction

| Entry     | Additive                               |                                                      | Conversion (%) <sup>a</sup> |
|-----------|----------------------------------------|------------------------------------------------------|-----------------------------|
|           | Brønsted acid                          | Zinc salt (1.5 eq)                                   |                             |
| 1         | none                                   | none                                                 | 5                           |
| 2         | TFA (1.0 equiv)                        | none                                                 | 30                          |
| 3         | TFA (1.0 equiv)                        | ZnCl <sub>2</sub>                                    | 43                          |
| 4         | TFA (1.0 equiv)                        | ZnSO <sub>3</sub> •2H <sub>2</sub> O                 | 24                          |
| 5         | TFA (1.0 equiv)                        | Zn(NO <sub>3</sub> ) <sub>2</sub> •6H <sub>2</sub> O | 45                          |
| 6         | TFA (1.0 equiv)                        | Zn(OTf) <sub>2</sub>                                 | 26                          |
| 7         | TFA (1.0 equiv)                        | ZnSO <sub>4</sub> •7H <sub>2</sub> O                 | 11                          |
| 8         | TFA (1.0 equiv)                        | Zn(OAc) <sub>2</sub>                                 | 13                          |
| 9         | TFA (1.0 equiv)                        | ZnF <sub>2</sub>                                     | 0                           |
| 10        | TFA (1.0 equiv)                        | ZnBr <sub>2</sub>                                    | 35                          |
| 11        | TFA (1.0 equiv)                        | ZnI <sub>2</sub>                                     | 9                           |
| 12        | 1M HCl (1.0 equiv)                     | ZnCl <sub>2</sub>                                    | 29                          |
| <b>13</b> | <b>TsOH•H<sub>2</sub>O (1.0 equiv)</b> | <b>ZnCl<sub>2</sub></b>                              | <b>65 (75)<sup>b</sup></b>  |
| 14        | TsOH•H <sub>2</sub> O (1.0 equiv)      | none                                                 | 25                          |
| 15        | none                                   | ZnCl <sub>2</sub>                                    | 49 (56) <sup>c</sup>        |

a: reaction ran on 0.05 mmol scale if not indicated  
b: conversion on 0.2 mmol scale, isolated yield 71%.  
c: conversion on 0.2 mmol scale, isolated yield 56%

### Difluoroethylation of Heterocycles: Standard Procedure

To a solution of heterocycle (0.20 mmol, 1.0 equiv), sodium difluoroethanesulfinate (DFES-Na) (**9**), (91.3 mg, 0.60 mmol, 3.0 equiv) and  $\text{ZnCl}_2$  (40.9 mg, 0.3 mmol, 1.5 equiv) in DCM (0.8 mL) and  $\text{H}_2\text{O}$  (0.32 mL) was added  $\text{TsOH}\cdot\text{H}_2\text{O}$  (38.0 mg, 0.20 mmol, 1.0 equiv). The reaction mixture was cooled using an ice bath and TBHP (70% solution in water, 0.138 mL, 1.0 mmol, 5.0 equiv) was added dropwise with vigorous stirring and the stirring was continued at this temperature for 5 min. The reaction was warmed to room temperature and monitored by TLC until completion. For substrates that do not go to completion in 24 h, a second addition of  $\text{ZnCl}_2$  (40.9 mg, 0.3 mmol, 1.5 equiv), DFES-Na (**9**) (91.3 mg, 0.60 mmol, 3.0 equiv) and TBHP (0.138 mL, 1.0 mmol, 5.0 equiv) was performed to drive the reaction further. Upon consumption of starting material, the reaction was partitioned between DCM (2.0 mL) and saturated aqueous  $\text{NaHCO}_3$  (2.0 mL). The organic layer was separated, and the aqueous layer was extracted with DCM (3 x 2.0 mL). The combined organic layers was dried over  $\text{Na}_2\text{SO}_4$ , concentrated in vacuum and purified with column chromatography.

**NOTE:** If the addition of TBHP is performed too rapidly, the resulting exotherm can result in reduced yield and selectivity. This is especially important on larger scales, where a syringe pump may be used to add in TBHP. (See gram-scale procedure for substrate **22**)

### Synthesis of sodium difluoroethanesulfinate (DFES-Na) (**9**), $\text{NaSO}_2\text{CF}_2\text{Me}$

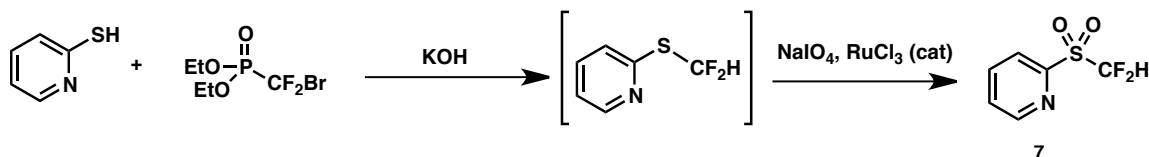

### 2-(Difluoromethylsulfonyl)pyridine (**7**, Hu's reagent)

2-(Difluoromethylsulfonyl)pyridine (**7**) was prepared in a new way by adapting a known procedure from a related substrate (Zafrani, Y.; Sod-Moriah, G.; Segall, Y. *Tetrahedron* **2009**, *65*, 5278-5283). KOH (101 g, 1.8 mol, 20 equiv) was added to a round bottom flask containing  $\text{H}_2\text{O}$  (110 mL) at 5 °C in an ice bath under stirring. 2-Mercaptopyridine

(10.0 g, 90.1 mol, 1.0 equiv) in MeCN (110 mL) was added and the resulting mixture was cooled to  $-30\text{ }^{\circ}\text{C}$  in a dry ice/acetone bath (reaction temperature monitored internally). Bromodifluoromethyl diethylphosphonate (19.2 mL, 108.1 mmol, 1.2 equiv) was added in one portion *via* syringe (solution appeared yellow). The cooling bath was removed and the reaction mixture was stirred for 30 min. The reaction was monitored by TLC and diluted with  $\text{CCl}_4$  (100 mL) upon completion (at which point the mixture appeared dark purple). The layers were separated and the aqueous phase was extracted with  $\text{CCl}_4$  (100 mL). The combined organic phase was eluted through silica gel using  $\text{Et}_2\text{O}$ :pentane (1:4). The resulting organic solution was concentrated carefully under vacuum to a volume of ca. 100 mL. MeCN (50 mL),  $\text{CCl}_4$  (50 mL), and  $\text{H}_2\text{O}$  (125 mL) were added and the mixture was stirred vigorously. Then  $\text{NaIO}_4$  (86.7 g, 0.405 mol, 4.5 equiv) and ruthenium trichloride hydrate (18 mg, 0.09 mmol, 0.001 equiv) were added. The reaction was stirred at rt for 14 h, then water (100 mL) and  $\text{Et}_2\text{O}$  (100 mL) were added, the layers were separated, and the resulting reaction mixture was extracted with  $\text{Et}_2\text{O}$  (100 mL  $\times$  3). The combined organic phase was washed with saturated  $\text{NaHCO}_3$  (100 mL), brine (100 mL), dried over  $\text{Na}_2\text{SO}_4$ , filtered through a thin pad of silica, and concentrated. The crude organic material was recrystallized from DCM resulting in **2** as a colorless solid (12.16 g, 70% yield over two steps). The spectroscopic data for this compound were identical to those reported in the literature: Zhao, Y.; Huang, W.; Zhu, L.; Hu, J. *Org. Lett.* **2010**, *12*, 1444-1447.

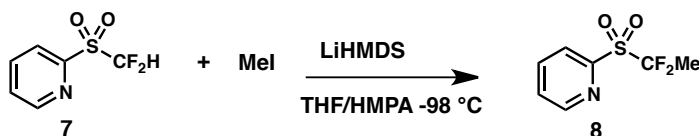

### 2-[(1,1-Difluoroethyl)sulfonyl]pyridine (**8**)

2-[(1,1-Difluoroethyl)sulfonyl]pyridine (**8**) was prepared using the alkylation procedure of Prakash et al. (see Prakash, G. K. S.; Ni, C.; Wang, F.; Hu, J.; Olah, G. A. *Angew. Chem. Int. Ed.* **2011**, *50*, 2559-2563). HMPA (22.5 mL) was added under Ar atmosphere to a solution of 2-(difluoromethylsulfonyl)pyridine (**7**) (10.5 g, 54.4 mmol, 1.0 equiv) in

THF (225 mL) in a 1 L 3-neck flask equipped with a stir bar and an internal thermometer. The reaction mixture was cooled to  $-98\text{ }^{\circ}\text{C}$  ( $\text{CH}_3\text{OH}/\text{liquid N}_2$  bath) and then MeI (16.8 mL) was added. Then, a THF solution of LiHMDS (1 M, 136 mL, 2.5 equiv) was added dropwise over 30 min and the reaction mixture was quenched after 10 min with saturated aqueous  $\text{NH}_4\text{Cl}$  solution (20 mL) at the same temperature. After removal of the cold bath,  $\text{H}_2\text{O}$  (200 mL) was added. The mixture was extracted with EtOAc (3 x 200 mL). The combined organic phase was treated with aqueous LiCl (5%) (3 x 200 mL) to remove HMPA and dried over  $\text{Na}_2\text{SO}_4$ . After the removal of solvents under reduced pressure, 11.26 g of the crude product was obtained and was pure enough to be used directly in the next reaction. An aliquot of crude product was purified by flash column chromatography for analysis (EtOAc/hexanes, from 1:10 to 1:4) to give **8** as a light yellow solid. m.p. =  $45\text{ }^{\circ}\text{C}$ ;  $R_f = 0.30$  (1:2 EtOAc:hexanes);  $^1\text{H NMR}$  (400 MHz,  $\text{CDCl}_3$ )  $\delta$  8.88 (qd,  $J = 4.7\text{ Hz}$ , 0.8 Hz, 1 H), 8.17 – 8.20 (m, 1 H), 8.02 – 8.06 (m, 1 H), 7.67 (ddd,  $J = 7.9\text{ Hz}$ , 4.7 Hz, 1.1 Hz, 1 H), 2.13 (t,  $J = 18.6\text{ Hz}$ , 3 H);  $^{13}\text{C NMR}$  (101 MHz,  $\text{CDCl}_3$ )  $\delta$  152.2, 151.0, 138.4, 128.8, 126.5, 124.7 (t,  $J_{\text{CF}} = 285.8\text{ Hz}$ ), 17.69 (t,  $J_{\text{CF}} = 21.6\text{ Hz}$ );  $^{19}\text{F NMR}$  (376 MHz,  $\text{CDCl}_3$ )  $\delta$   $-96.0$ ; IR (neat)  $\nu = 1333, 1190, 1169, 1133, 1097, 1077, 954, 896, 790, 745, 679, 581, 561, 504, 475\text{ cm}^{-1}$ ; HRMS (ESI-TOF) calc'd for  $\text{C}_7\text{H}_8\text{NO}_2\text{SF}_2$  [ $\text{M}+\text{H}^+$ ] 208.0238; found 208.0230.

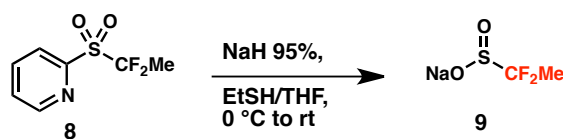

### Sodium difluoroethanesulfinate (DFES-Na; **9**)

Sodium difluoroethanesulfinate (DFES-Na) (**9**) was prepared using the cleavage procedure of Prakash et al. (see Prakash, G. K. S.; Ni, C.; Wang, F.; Hu, J.; Olah, G. A. *Angew. Chem. Int. Ed.* **2011**, *50*, 2559-2563). EtSH (17.3 mL) was added slowly into a suspension of NaH (95%) (2.49 g, 103 mmol, 3.0 equiv) in THF (120 ml) at  $0\text{ }^{\circ}\text{C}$  under Ar atmosphere (*Caution: EtSH has a strongly disagreeable odor, so it should be handled in a well ventilated hood!*) After stirring at  $0\text{ }^{\circ}\text{C}$  for 5 min, a THF (60 mL) solution of 2-[(1,1-difluoroethyl)sulfonyl]pyridine (**8**) (7.155 g, 34.6 mmol, 1.0 equiv) was added. The

flask was sealed with a cap and further wrapped with parafilm. The mixture was stirred at 0 °C for 2 h, then at rt for 10 h. After the removal of solvent under vacuum, the residue was treated with H<sub>2</sub>O (20 mL) and neutralized to pH 7 by HCl (1 M), then extracted with Et<sub>2</sub>O (20 × 3 mL) to remove 2-(ethylthio)pyridine and EtSH. The aqueous phase was concentrated, and the residue was purified by column chromatography using (MeOH/DCM 1:6 as eluent) resulting in DFES-Na as a white solid (4.102 g, 78% yield).  $R_f = 0.4$  (1:2 MeOH:DCM); m.p. >300 °C; <sup>1</sup>H NMR (400 MHz, D<sub>2</sub>O) δ 1.67 (t,  $J = 19.5$  Hz, 3 H); <sup>13</sup>C NMR (151 MHz, D<sub>2</sub>O) δ 128.7 (t,  $J_{CF} = 277.5$  Hz), 14.5 (t,  $J_{CF} = 22.7$  Hz); <sup>19</sup>F NMR (376 MHz, D<sub>2</sub>O) δ -106.8; IR (neat)  $\nu = 1711, 1383, 1109, 1046, 946, 891, 828, 756, 598, 508, 475, 440$  cm<sup>-1</sup>.

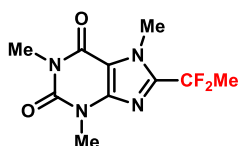

**8-(1,1-Difluoroethyl)-1,3,7-trimethyl-1H-purine-2,6(3H,7H)-dione (11).**

For 0.20 mmol scale, the standard procedure was followed with a reaction time of 38 h (second addition of reagents was performed after 24 h) to provide **11** in 87% yield as a white solid. m.p. = 154–156 °C;  $R_f = 0.40$  (1:40 MeOH:DCM); <sup>1</sup>H NMR (400 MHz, CDCl<sub>3</sub>) δ 4.14 (t,  $J = 1.6$  Hz, 3 H), 3.55 (s, 3 H), 3.40 (s, 3 H), 2.15 (t,  $J = 19.2$  Hz, 3H); <sup>13</sup>C NMR (151 MHz, CDCl<sub>3</sub>) δ 155.8, 151.7, 146.5, 145.4 (t,  $J_{CF} = 31.7$  Hz), 118.4 (t,  $J_{CF} = 234.5$ ), 109.4, 33.5 (t,  $J_{CF} = 3.8$  Hz), 29.8, 28.2, 23.1 (t,  $J_{CF} = 24.8$  Hz); <sup>19</sup>F NMR (376 MHz, CDCl<sub>3</sub>) δ -87.5; IR (neat)  $\nu = 1703, 1655, 1547, 1428, 1389, 1341, 1241, 1219, 1174, 1120, 914, 903, 748, 663, 498$ , cm<sup>-1</sup>; HRMS (ESI-TOF) calc'd for C<sub>10</sub>H<sub>13</sub>N<sub>4</sub>O<sub>2</sub>F<sub>2</sub> [M+H<sup>+</sup>] 259.1001; found 259.1003.

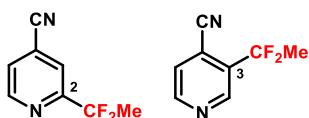



**2-(1,1-Difluoroethyl)isonicotinonitrile (12-C2) and 3-(1,1-difluoroethyl)isonicotinonitrile (12-C3).**

For 0.20 mmol scale, the standard procedure was followed with a reaction time of 24 h to provide **12-C2** and **12-C3** as colorless oils in a combined yield of 74% yield (volatile!).

**12-C2:**  $R_f = 0.8$  (1:3 EtOAc/hexanes);  $^1\text{H NMR}$  (400 MHz,  $\text{CDCl}_3$ )  $\delta$  8.84–8.83 (m, 1 H), 7.89 (m, 1 H), 7.62–7.60 (m, 1 H), 2.03 (t,  $J = 18.8$  Hz, 3 H);  $^{13}\text{C NMR}$  (151 MHz,  $\text{CDCl}_3$ )  $\delta$  157.0 (t,  $J_{\text{CF}} = 30.6$  Hz), 150.5, 126.4 (t,  $J_{\text{CF}} = 1.3$  Hz), 121.8, 121.6 (t,  $J_{\text{CF}} = 4.4$  Hz), 120.3 (t,  $J_{\text{CF}} = 238.2$  Hz), 116.0, 23.4 (t,  $J_{\text{CF}} = 26.7$  Hz);  $^{19}\text{F NMR}$  (376 MHz,  $\text{CDCl}_3$ )  $\delta$  –91.4; IR (neat)  $\nu = 1383, 1306, 1189, 1137, 1114, 1093, 931, 853, 838, 722, 615, 536$   $\text{cm}^{-1}$ ; HRMS (ESI-TOF) calc'd for  $\text{C}_8\text{H}_7\text{N}_2\text{F}_2$   $[\text{M}+\text{H}^+]$  169.0572; found 169.0571.

**12-C3:**  $R_f = 0.33$  (1/3 EtOAc/hexanes);  $^1\text{H NMR}$  (400 MHz,  $\text{CDCl}_3$ )  $\delta$  8.99 (br s, 1 H), 8.89 (d,  $J = 5.2$  Hz, 1 H), 7.66–7.64 (m, 1 H), 2.10 (t,  $J = 18.4$ , 3 H);  $^{13}\text{C NMR}$  (151 MHz,  $\text{CDCl}_3$ )  $\delta$  152.1, 146.6 (t,  $J_{\text{CF}} = 8.0$  Hz), 134.3 (t,  $J_{\text{CF}} = 27.2$  Hz), 126.8, 119.9 (t,  $J_{\text{CF}} = 240.9$  Hz), 117.9 (t,  $J_{\text{CF}} = 3.8$  Hz), 114.7, 25.6 (t,  $J_{\text{CF}} = 28.1$  Hz);  $^{19}\text{F NMR}$  (376 MHz,  $\text{CDCl}_3$ )  $\delta$  –87.9; IR (neat)  $\nu = 2361, 2339, 1388, 1316, 1269, 1167, 1129, 1100, 934, 916, 844, 799, 558$   $\text{cm}^{-1}$ ; HRMS (ESI-TOF) calc'd for  $\text{C}_8\text{H}_7\text{NF}_2$   $[\text{M}+\text{H}^+]$  169.0572; found 169.0570.

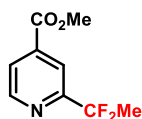

**Methyl 2-(1,1-difluoroethyl)isonicotinate (13).**

For 0.20 mmol scale, the standard procedure was followed with a reaction time of 24 h to provide **13** in 92% yield as a colorless oil:  $R_f = 0.58$  (1:4 EtOAc:hexanes);  $^1\text{H NMR}$  (400 MHz,  $\text{CDCl}_3$ )  $\delta$  8.80 (d,  $J = 4.8$  Hz, 1 H), 8.20 (s, 1 H), 7.92 (d,  $J = 4.8$  Hz, 1 H), 3.98 (s, 3 H), 2.04 (t,  $J = 18.6$  Hz, 3 H);  $^{13}\text{C NMR}$  (151 MHz,  $\text{CDCl}_3$ )  $\delta$  165.1, 156.6 (t,  $J_{\text{CF}} = 30.1$  Hz), 150.3, 138.8, 124.1, 120.7 (t,  $J_{\text{CF}} = 239.3$  Hz), 119.0 (t,  $J_{\text{CF}} = 4.3$  Hz), 53.1, 23.4 (t,  $J_{\text{CF}} = 27.3$  Hz);  $^{19}\text{F NMR}$  (376 MHz,  $\text{CDCl}_3$ ) –91.2; IR (neat)  $\nu = 2955, 2921, 2852, 1735, 1438, 1414, 1318, 1255, 1186, 1132, 927, 764$   $\text{cm}^{-1}$ ; HRMS (ESI-TOF) calc'd for  $\text{C}_9\text{H}_{10}\text{NO}_2\text{F}_2$   $[\text{M}+\text{H}^+]$  202.0674; found 202.0683.

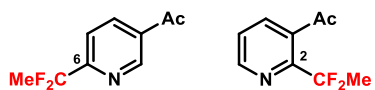

**3-Acetyl-2-(1,1-Difluoroethyl)pyridine (14-C2) and 3-acetyl-6-(1,1-difluoroethyl)pyridine (14-C6).**

For 0.20 mmol scale, the standard procedure was followed with a reaction time of 24 h to provide **14-C2** in 8% yield and **14-C6** in 27% yield as colorless oils (35% combined yield).

**14-C2:**  $R_f = 0.31$  (1:1 EtOAc:hexanes); <sup>1</sup>H NMR (400 MHz, CDCl<sub>3</sub>) 8.68 (d,  $J = 4.0$  Hz, 1 H), 7.65 (dd,  $J = 7.8, 1.5$  Hz, 1 H), 7.42 (dd,  $J = 7.8, 4.8$  Hz, 1 H), 2.58 (s, 3 H), 2.07 (t,  $J = 19.1$  Hz, 3 H); <sup>13</sup>C NMR (151 MHz, CDCl<sub>3</sub>) 202.4, 150.8 (t,  $J = 30.0$  Hz), 149.6, 136.3, 134.7, 124.5, 121.9 (t,  $J = 239.7$  Hz), 31.6, 24.2 (t,  $J = 27.0$  Hz); <sup>19</sup>F NMR (376 MHz, CDCl<sub>3</sub>) -86.3; IR (neat)  $\nu = 2954, 2923, 2854, 1693, 1593, 1388, 1306, 1266, 1148, 1127, 919, 663$  cm<sup>-1</sup>; HRMS (ESI-TOF) calc'd for C<sub>9</sub>H<sub>9</sub>NOF<sub>2</sub> [M + H<sup>+</sup>] 186.0725; found 186.0723.

**14-C6:**  $R_f = 0.50$  (1:2 EtOAc:hexanes); <sup>1</sup>H NMR (400 MHz, CDCl<sub>3</sub>)  $\delta$  9.16 – 9.17 (m, 1 H), 8.34 (dd,  $J = 8.1$  Hz, 2.2 Hz, 1 H), 7.77 (d,  $J = 8.1$  Hz, 1 H), 2.66 (s, 3 H), 2.04 (t,  $J = 18.7, 3$  H); <sup>13</sup>C NMR (151 MHz, CDCl<sub>3</sub>)  $\delta$  196.2, 158.9 (t,  $J_{CF} = 29.9$  Hz), 149.5, 137.0, 133.0, 120.7 (t,  $J_{CF} = 239.3$  Hz), 119.6 (t,  $J_{CF} = 4.13$  Hz), 27.1, 23.4 (t,  $J_{CF} = 27.2$  Hz); <sup>19</sup>F NMR (376 MHz, CDCl<sub>3</sub>)  $\delta$  -91.6; IR (neat)  $\nu = 2923, 2852, 1692, 1594, 1388, 1306, 1266, 1138, 1127, 1108, 918, 849, 633$  cm<sup>-1</sup>; HRMS (ESI-TOF) calc'd for C<sub>9</sub>H<sub>10</sub>NOF<sub>2</sub> [M+H<sup>+</sup>] 186.0725; found 186.0729.

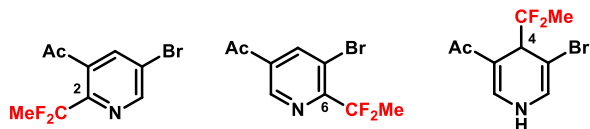

**3-Acetyl-5-bromo-2-(1,1-difluoroethyl)pyridine (15-C2), 3-acetyl-5-bromo-6-(1,1-difluoroethyl)pyridine (15-C6) and 3-acetyl-5-bromo-4-(1,1-difluoroethyl)-1,4-dihydropyridine (15-C4)**

For 0.20 mmol scale, the standard procedure was followed with a reaction time of 24 h to provide **15-C2** in 31% yield and **15-C6** in 9% yield as colorless oils, as well as **15-C4** in 24% yield as a white solid (64% combined yield).

**15-C2:**  $R_f = 0.30$  (1:4 EtOAc:hexanes);  $^1\text{H NMR}$  (400 MHz,  $\text{CDCl}_3$ )  $\delta$  8.85 (s, 1 H), 8.43 (s, 1 H), 2.59 (t,  $J = 1.0$  Hz, 3 H), 2.09 (t,  $J = 18.7$  Hz, 3 H);  $^{13}\text{C NMR}$  (151 MHz,  $\text{CDCl}_3$ )  $\delta$  200.9, 154.8, 145.0, 141.5 (t,  $J_{\text{CF}} = 26.9$  Hz), 137.5, 121.3 (t,  $J_{\text{CF}} = 242.3$  Hz), 118.3, 31.7, 24.7 (t,  $J_{\text{CF}} = 26.3$  Hz);  $^{19}\text{F NMR}$  (376 MHz,  $\text{CDCl}_3$ )  $\delta$  -82.8; IR (neat)  $\nu = 2921, 2852, 1697, 1357, 1267, 1129, 1066, 932, 919, 898, 762, 629, 611, 597, 492$   $\text{cm}^{-1}$ ; HRMS (ESI-TOF) calc'd for  $\text{C}_9\text{H}_9\text{NOF}_2\text{Br}$  [ $\text{M}+\text{H}^+$ ] 263.9830; found 263.9833.

**15-C6:**  $R_f = 0.35$  (1:4 EtOAc:hexanes);  $^1\text{H NMR}$  (600 MHz,  $\text{CDCl}_3$ )  $\delta$  9.02 (d,  $J = 1.9$  Hz, 1 H), 8.49 (d,  $J = 1.9$  Hz, 1 H), 2.66 (s, 3 H), 2.11 (t,  $J = 18.9$  Hz, 3 H);  $^{13}\text{C NMR}$  (151 MHz,  $\text{CDCl}_3$ )  $\delta$  194.9 155.3 (t,  $J_{\text{CF}} = 29.3$  Hz), 146.4, 142.6, 133.9, 121.3 (t,  $J_{\text{CF}} = 241.2$  Hz), 118.5, 27.2, 23.1 (t,  $J_{\text{CF}} = 26.2$  Hz);  $^{19}\text{F NMR}$  (376 MHz,  $\text{CDCl}_3$ )  $\delta$  -89.9; IR (neat)  $\nu = 3008, 2927, 1693, 1582, 1493, 1391, 1295, 1213, 1166, 1124, 1038, 914, 663, 567, 504$   $\text{cm}^{-1}$ ; HRMS (ESI-TOF) calc'd for  $\text{C}_9\text{H}_9\text{NOF}_2\text{Br}$  [ $\text{M}+\text{H}^+$ ] 263.9830; found 263.9836.

**15-C4:** m.p. = 122 °C;  $R_f = 0.23$  (1:2 EtOAc:hexanes);  $^1\text{H NMR}$  (400 MHz,  $\text{CDCl}_3$ )  $\delta$  7.43 (d,  $J = 5.4$  Hz, 1 H), 6.69 (d,  $J = 5.4$  Hz, 1 H), 6.39 (br s, 1 H), 4.39 (t,  $J = 12.0$  Hz, 1 H), 2.29 (s, 3 H), 1.57 (t,  $J = 19.0$  Hz, 3 H);  $^{13}\text{C NMR}$  (151 MHz,  $\text{CDCl}_3$ )  $\delta$  194.9, 138.0, 127.8, 125.1 (t,  $J_{\text{CF}} = 245.8$  Hz), 107.2 (t,  $J_{\text{CF}} = 3.2$  Hz), 94.7 (t,  $J_{\text{CF}} = 4.0$  Hz), 46.2 (t,  $J_{\text{CF}} = 26.2$  Hz), 25.2, 21.7 (t,  $J_{\text{CF}} = 26.9$  Hz);  $^{19}\text{F NMR}$  (376 MHz,  $\text{CDCl}_3$ )  $\delta$  -97.4 (AB system,  $J_1 = 404.0$  Hz,  $J_2 = 239.0$  Hz); IR (neat)  $\nu = 3251, 2360, 1630, 1485, 1343, 1293, 1227, 1018, 986, 916, 861, 652, 633, 547, 520$   $\text{cm}^{-1}$ ; HRMS (ESI-TOF) calc'd for  $\text{C}_9\text{H}_{11}\text{NOF}_2\text{Br}$  [ $\text{M}+\text{H}^+$ ] 265.9987; found 265.9993.

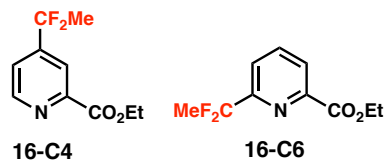

**Ethyl 4-(1,1-difluoroethyl)picolinate (16-C4) and ethyl 6-(1,1-difluoroethyl)picolinate (16-C6).**

For 0.20 mmol scale, the standard procedure was followed with a reaction time of 32 h (second addition of reagents was performed after 16 h) to provide **16-C4** in 56% yield and **16-C6** in 21% yield as colorless oils (78% combined yield).

**16-C4:**  $R_f = 0.29$  (1:2 EtOAc:hexanes);  $^1\text{H NMR}$  (400 MHz,  $\text{CDCl}_3$ )  $\delta$  8.85 (d,  $J = 4.5$  Hz, 1 H), 8.22 (s, 1 H), 7.58 (d,  $J = 4.5$  Hz, 1 H), 4.50 (q,  $J = 7.1$  Hz, 2 H), 1.94 (t,  $J = 18.3$  Hz, 3H), 1.45 (t,  $J = 7.1$  Hz, 3 H).  $^{13}\text{C NMR}$  (151 MHz,  $\text{CDCl}_3$ )  $\delta$  164.7, 150.6, 149.1, 147.6 (t,  $J_{\text{CF}} = 28.6$  Hz), 122.4 (t,  $J_{\text{CF}} = 5.6$  Hz), 120.9 (t,  $J_{\text{CF}} = 5.7$  Hz), 120.3 (t,  $J_{\text{CF}} = 239.8$  Hz), 62.5, 25.6 (t,  $J_{\text{CF}} = 28.6$  Hz), 14.5;  $^{19}\text{F NMR}$  (376 MHz,  $\text{CDCl}_3$ )  $\delta$  -91.3; IR (neat)  $\nu = 3732, 3625, 2985, 1718, 1472, 1388, 1366, 1256, 1240, 1018, 995, 859, 754, 695, 461$   $\text{cm}^{-1}$ ; HRMS (ESI-TOF) calc'd for  $\text{C}_{10}\text{H}_{12}\text{NO}_2\text{F}_2$   $[\text{M}+\text{H}^+]$  216.0831; found 216.0837.

**16-C6:**  $R_f = 0.69$  (1:2 EtOAc:hexanes);  $^1\text{H NMR}$  (400 MHz,  $\text{CDCl}_3$ ) 8.17 (d,  $J = 7.8$  Hz, 1 H), 7.96 (t,  $J = 7.8$  Hz, 1 H), 7.86–7.80 (m, 1 H), 4.47 (q,  $J = 7.1$  Hz, 2 H), 2.09 (t,  $J = 18.8$  Hz, 3 H), 1.43 (t,  $J = 7.1$  Hz, 3 H);  $^{13}\text{C NMR}$  (151 MHz,  $\text{CDCl}_3$ )  $\delta$  165.0, 155.9 (t,  $J_{\text{CF}} = 30.5$  Hz), 148.3, 138.5, 126.3, 122.9 (t,  $J_{\text{CF}} = 3.9$  Hz), 121.1 (t,  $J_{\text{CF}} = 238.7$  Hz), 62.4, 23.4 (t,  $J_{\text{CF}} = 26.9$  Hz), 14.6;  $^{19}\text{F NMR}$  (376 MHz,  $\text{CDCl}_3$ )  $\delta$  -90.1; IR (neat)  $\nu = 3602, 2920, 2154, 1933, 1700, 1722, 1672, 1299, 1244, 1139, 129, 879, 821, 799, 770, 576, 450$   $\text{cm}^{-1}$ ; HRMS (ESI-TOF) calc'd for  $\text{C}_{10}\text{H}_{12}\text{NO}_2\text{F}_2$   $[\text{M}+\text{H}^+]$  216.0831; found 216.0831.

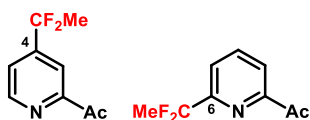

**2-acetyl-4-(1,1-difluoroethyl)pyridine (17-C4) and 2-acetyl-6-(1,1-difluoroethyl)pyridine (17-C6).**

For 0.20 mmol scale, the standard procedure was followed with a reaction time of 48 h (second addition of reagents was performed after 24 h) to provide **17-C4** in 48% yield and **17-C6** in 22% yield as colorless oils (70% combined yield).

**17-C4:**  $R_f = 0.63$  (1:2 EtOAc:hexanes);  $^1\text{H NMR}$  (400 MHz,  $\text{CDCl}_3$ )  $\delta$  8.78 (dd,  $J = 5.0, 0.9$  Hz, 1 H), 8.14 (dd,  $J = 1.9, 0.9$  Hz, 1 H), 7.65–7.54 (m, 1 H), 2.75 (s, 3 H), 1.93 (t,  $J = 18.3$  Hz, 3 H);  $^{13}\text{C NMR}$  (151 MHz,  $\text{CDCl}_3$ )  $\delta$  199.5, 154.4, 149.8, 147.4 (t,  $J_{\text{CF}} = 28.5$  Hz), 122.5 (t,  $J_{\text{CF}} = 5.5$  Hz), 120.4 (t,  $J_{\text{CF}} = 239.5$  Hz), 117.5 (t,  $J_{\text{CF}} = 5.7$  Hz), 26.0, 25.5 (t,  $J_{\text{CF}} = 28.6$  Hz);  $^{19}\text{F NMR}$  (376 MHz,  $\text{CDCl}_3$ )  $\delta$  -91.1; IR (neat)  $\nu = 2926, 1700, 1607, 1387, 1310, 1177, 1144, 929, 852, 589$   $\text{cm}^{-1}$ ; HRMS (ESI-TOF) calc'd for  $\text{C}_9\text{H}_{10}\text{NOF}_2$   $[\text{M}+\text{H}^+]$  186.0725; found 186.0729.

**17-C6:**  $R_f = 0.479$  (1:2 EtOAc:hexanes);  $^1\text{H NMR}$  (600 MHz,  $\text{CDCl}_3$ )  $\delta$  8.10 (d,  $J = 8.2$  Hz, 1 H), 7.96 (t,  $J = 7.8$  Hz, 1 H), 7.86 (d,  $J = 8.5$  Hz, 1 H), 2.74 (s, 3 H), 2.09 (t,  $J = 18.7$  Hz, 3 H);  $^{13}\text{C NMR}$  (151 MHz,  $\text{CDCl}_3$ )  $\delta$  199.7, 154.8 (t,  $J_{\text{CF}} = 30.6$  Hz), 152.9, 138.3, 123.0, 122.5, 120.5 (t,  $J_{\text{CF}} = 235.1$  Hz), 25.7, 22.9 (t,  $J_{\text{CF}} = 27.0$  Hz);  $^{19}\text{F NMR}$  (376 MHz,  $\text{CDCl}_3$ )  $\delta$  -90.1; IR (neat)  $\nu = 3005, 1700, 1605, 1562, 1354, 1310, 1234, 1176, 1145, 927, 853, 563$   $\text{cm}^{-1}$ ; HRMS (ESI-TOF) calc'd for  $\text{C}_9\text{H}_{10}\text{NOF}_2$   $[\text{M}+\text{H}^+]$  186.0725; found 186.0725.

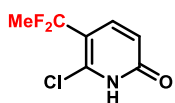

**6-Chloro-5-(1,1-difluoroethyl)pyridin-2(1H)-one (18).**

For 0.20 mmol scale, the standard procedure was followed with a reaction time of 40 h (second addition of reagents was performed after 24 h) to provide **18** in 58% yield as a white solid. m.p. = 114 °C;  $R_f = 0.37$  (1:5 EtOAc:hexanes);  $^1\text{H NMR}$  (400 MHz,  $\text{CDCl}_3$ )  $\delta$  7.78 (d,  $J = 7.8$  Hz, 1 H), 6.65 (d,  $J = 7.8$  Hz, 1 H), 2.06 (t,  $J = 18.9$  Hz, 3 H);  $^{13}\text{C NMR}$  (151 MHz,  $\text{CDCl}_3$ )  $\delta$  162.0, 143.3, 139.1 (t,  $J_{\text{CF}} = 7.5$  Hz), 122.4 (t,  $J_{\text{CF}} = 27.2$  Hz), 120.1 (t,  $J_{\text{CF}} = 239.9$  Hz), 110.8, 23.6 (t,  $J_{\text{CF}} = 27.9$  Hz);  $^{19}\text{F NMR}$  (376 MHz,  $\text{CDCl}_3$ )  $\delta$  -89.3; IR (neat)  $\nu = 2919, 1651, 1592, 1459, 1286, 1233, 1180, 910, 847, 774, 664, 603, 563,$

423  $\text{cm}^{-1}$ ; HRMS (ESI-TOF) calc'd for  $\text{C}_7\text{H}_7\text{NOF}_2\text{Cl}$   $[\text{M}+\text{H}^+]$  194.0179; found 194.0176.

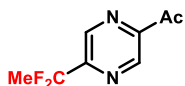

### 2-Acetyl-5-(1,1-difluoroethyl)pyrazine (19).

For 0.20 mmol scale, the standard procedure was followed with a reaction time of 24 h to provide **19** in 67% yield as colorless crystals.  $R_f = 0.80$  (1:3 EtOAc:pentane); m.p. = 49–50  $^{\circ}\text{C}$ ;  $^1\text{H}$  NMR (400 MHz,  $\text{CDCl}_3$ )  $\delta$  9.21 (d,  $J = 0.8$  Hz, 1 H), 8.98 (d,  $J = 0.8$  Hz, 1 H), 2.74 (s, 3 H), 2.06 (t,  $J = 18.8$  Hz, 3 H);  $^{13}\text{C}$  NMR (151 MHz,  $\text{CDCl}_3$ )  $\delta$  198.8, 153.1 (t,  $J_{\text{CF}} = 30.4$  Hz), 148.4, 142.4, 140.3, 120.5 (t,  $J_{\text{CF}} = 237.6$  Hz), 26.1, 23.1 (t,  $J_{\text{CF}} = 23.1$  Hz);  $^{19}\text{F}$  NMR (376 MHz,  $\text{CDCl}_3$ )  $\delta$  -91.7; IR (neat)  $\nu = 1699, 1366, 1391, 1271, 118, 1025, 911, 662, 415$   $\text{cm}^{-1}$ ; HRMS (ESI-TOF) calc'd for  $\text{C}_8\text{H}_9\text{N}_2\text{OF}_2$   $[\text{M}+\text{H}^+]$  187.0677; found 187.0675.

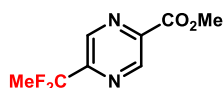

### Methyl 5-(1,1-difluoroethyl)pyrazine-2-carboxylate (20).

For 0.20 mmol scale, the standard procedure was followed with a reaction time of 42 h (second addition of reagents was performed after 16 h, and third addition of 1.5 equiv of DFES-Na was performed after 32 h) to provide **20** in 55% yield as a white solid. m.p. = 56  $^{\circ}\text{C}$ ;  $R_f = 0.35$  (1:4 EtOAc:hexanes);  $^1\text{H}$  NMR (400 MHz,  $\text{CDCl}_3$ )  $\delta$  9.30 (s, 1 H), 9.03 (s, 1 H), 4.06 (s, 3 H), 2.06 (t,  $J = 18.8$  Hz, 3 H);  $^{13}\text{C}$  NMR (151 MHz,  $\text{CDCl}_3$ )  $\delta$  163.9, 153.1 (t,  $J_{\text{CF}} = 30.8$  Hz), 145.1, 144.2, 141.1 (t,  $J_{\text{CF}} = 4.6$  Hz), 120.4 (t,  $J_{\text{CF}} = 239.4$  Hz), 53.5, 23.1 (t,  $J_{\text{CF}} = 26.6$  Hz);  $^{19}\text{F}$  NMR (376 MHz,  $\text{CDCl}_3$ )  $\delta$  -91.8; IR (neat)  $\nu = 3093, 3012, 2957, 1389, 1341, 1287, 1190, 1103, 962, 813, 770, 735, 643, 428$   $\text{cm}^{-1}$ ; HRMS (ESI-TOF) calc'd for  $\text{C}_8\text{H}_9\text{N}_2\text{O}_2\text{F}_2$   $[\text{M}+\text{H}^+]$  203.0627; found 203.0631.

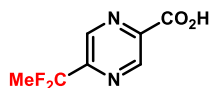

### 5-(1,1-Difluoroethyl)pyrazine-2-carboxylic acid (**21**).

For 0.20 mmol scale, the standard procedure was followed with a reaction time of 24 h to provide **21** in 55% yield as a light yellow solid: m.p. = 110–113°C;  $R_f$  = 0.60 (1:3 MeOH:DCM);  $^1\text{H}$  NMR (400 MHz,  $\text{CD}_3\text{OD}$ )  $\delta$  9.33 (br s, 1 H), 9.00 (br s, 1 H), 2.06 (t,  $J$  = 18.8 Hz, 3 H);  $^{13}\text{C}$  NMR (151 MHz,  $\text{CD}_3\text{OD}$ )  $\delta$  178.0, 166.1, 154.2 (t,  $J$  = 29.8 Hz), 146.3, 141.5, 121.8 (t,  $J$  = 238.4 Hz), 23.1 (t,  $J$  = 26.6 Hz);  $^{19}\text{F}$  NMR (376 MHz,  $\text{CD}_3\text{OD}$ )  $\delta$  -92.7; IR (neat)  $\nu$  = 1726, 1388, 1298, 1136, 1101, 1035, 918, 831, 814, 722, 408  $\text{cm}^{-1}$ ; HRMS (ESI-TOF) calc'd for  $\text{C}_7\text{H}_7\text{N}_2\text{O}_2\text{F}_2$  [ $\text{M}+\text{H}^+$ ] 189.047; found 189.0468.

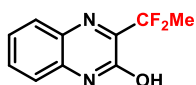

### 3-(1,1-Difluoroethyl)quinoxalin-2-ol (**22**).

For 0.20 mmol scale, the standard procedure was followed (2 equiv of DFES-Na was used) with a reaction time of 10 h to provide **22** in 95% yield.

Gram-scale procedure:  $\text{TsOH}\cdot\text{H}_2\text{O}$  (1.3 g, 6.84 mmol, 1.0 equiv) was added to an open air, stirred solution of 2-quinoxalinol (1.00 g, 6.84 mmol, 1.0 equiv), DFES-Na (2.6 g, 17.1 mmol, 2.5 equiv) and  $\text{ZnCl}_2$  (1.16 g, 8.55 mmol, 1.25 equiv) in DCM (27 mL) and  $\text{H}_2\text{O}$  (11 mL) at 0 °C. TBHP (70% solution in  $\text{H}_2\text{O}$ , 4.7 mL, 34.2 mmol, 5.0 equiv) was added slowly with vigorous stirring in three portions over 30 min and stirring was continued at this temperature for 1 h. The ice bath was then removed, and the reaction was warmed to rt and stirred for 24 h with oxygen bubbling into the reaction mixture. The reaction was quenched with aqueous solution of  $\text{NaHCO}_3$  (125 mL), then extracted with DCM (3  $\times$  30 mL). The combined organic layers were washed with brine and dried over  $\text{Na}_2\text{SO}_4$ . The crude material was mixed with a minimal amount of silica gel and was purified by column chromatography (gradient from 1:5 to 1:2 EtOAc:hexanes). Removal of the solvent under vacuum provided (**22**) as a white solid (1.28 g, 89% yield).  $R_f$  = 0.50 (50% EtOAc in hexanes); m.p. = 172–174 °C;  $^1\text{H}$  NMR (600 MHz,  $\text{CDCl}_3$ )  $\delta$  7.95 (d,  $J$  = 7.8 Hz, 1 H), 7.65–7.62 (m, 1 H), 7.46–7.40 (m, 2 H), 2.18 (t,  $J$  = 19.2 Hz, 3 H);  $^{13}\text{C}$  NMR (151 MHz,  $\text{CDCl}_3$ )  $\delta$  154.6, 150.8 (t,  $J_{\text{CF}}$  = 27.8 Hz), 132.6, 132.3, 131.5, 130.3,

125.0, 119.8 (t,  $J_{CF} = 239.8$  Hz), 116.1, 22.6 (t,  $J_{CF} = 25.9$  Hz);  $^{19}\text{F}$  NMR (376 MHz,  $\text{CDCl}_3$ )  $\delta$  -94.8; IR (neat)  $\nu = 2382, 1666, 1503, 1485, 1432, 1297, 1224, 1184, 1065, 928, 824, 761, 672, 552, 505, 479$   $\text{cm}^{-1}$ ; HRMS (ESI-TOF) calc'd for  $\text{C}_{10}\text{H}_9\text{N}_2\text{OF}_2$   $[\text{M}+\text{H}^+]$  211.0677; found 211.0676.

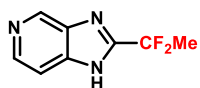

### 2-(1,1-Difluoroethyl)-1H-imidazo[4,5-c]pyridine (23).

For 0.20 mmol scale, the standard procedure was followed with a reaction time of 24 h to provide **23** in 44% yield as white solid.  $R_f = 0.33$  (1:9 MeOH:DCM); m.p. = 193-197°C (decomposed);  $^1\text{H}$  NMR (400 MHz, acetone- $d_6$ )  $\delta$  8.44 (s, 1 H), 8.39 (dt,  $J = 5.5, 0.8$  Hz, 1 H), 7.78 (dt,  $J = 5.5, 0.9$  Hz, 1 H), 2.17 (t,  $J = 19.0$  Hz, 3 H);  $^{13}\text{C}$  NMR (151 MHz, acetone- $d_6$ )  $\delta$  148.1, 146.0, 142.6 (t,  $J_{CF} = 31.7$  Hz), 141.0, 130.9, 123.2 (t,  $J_{CF} = 235.6$  Hz), 114.9, 23.2 (t,  $J_{CF} = 26.8$  Hz);  $^{19}\text{F}$  NMR (376 MHz, acetone- $d_6$ )  $\delta$  -87.2; IR (neat)  $\nu = 2801, 1481, 1418, 1379, 1253, 1216, 1187, 952, 935, 906, 888, 627, 589, 529, 466$   $\text{cm}^{-1}$ ; HRMS (ESI-TOF) calc'd for  $\text{C}_8\text{H}_8\text{N}_3\text{F}_2$   $[\text{M}+\text{H}^+]$  184.0681; found 184.0683.

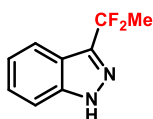

### 3-(1,1-Difluoroethyl)-1H-indazole (24).

For 0.20 mmol scale, the standard procedure was followed with a reaction time of 24 h to provide **24** in 40% yield as a colorless oil.  $R_f = 0.60$  (1:2 EtOAc/hexanes);  $^1\text{H}$  NMR (400 MHz,  $\text{CDCl}_3$ )  $\delta$  10.12 (br s, 1 H), 7.99-7.96 (m, 1 H), 7.51 (ddd,  $J = 8.5$  Hz, 1.0 Hz, 1.0 Hz, 1 H), 7.44 (ddd,  $J = 8.5$  Hz, 6.8 Hz, 1.0 Hz, 1 H), 7.28-7.24 (m, 1 H), 2.20 (t,  $J = 18.4$  Hz, 3 H);  $^{13}\text{C}$  NMR (151 MHz,  $\text{CDCl}_3$ )  $\delta$  143.1 (t,  $J_{CF} = 34.7$  Hz), 141.2, 127.6, 122.2, 121.4, 120.6 (t,  $J_{CF} = 230.3$  Hz), 119.8, 109.9, 23.7 (t,  $J_{CF} = 26.7$  Hz);  $^{19}\text{F}$  NMR (376 MHz,  $\text{CDCl}_3$ )  $\delta$  -84.6; IR (neat)  $\nu = 3188, 1498, 1384, 1218, 1118, 1040, 912, 743$   $\text{cm}^{-1}$ ; HRMS (ESI-TOF) calc'd for  $\text{C}_9\text{H}_9\text{N}_2\text{F}_2$   $[\text{M}+\text{H}^+]$  183.0728; found 183.0734.



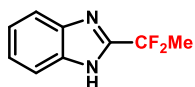

### 2-(1,1-Difluoroethyl)-1H-benzo[d]imidazole (**25**).

For 0.20 mmol scale, the standard procedure was followed with a reaction time of 24 h to provide **25** in 80% yield as a white solid. m.p. = 190°C (decomposed);  $R_f$  = 0.33 (1:4 EtOAc:hexanes);  $^1\text{H}$  NMR (400 MHz,  $\text{CDCl}_3$ )  $\delta$  9.67 (br s, 1 H), 7.84 (d,  $J$  = 8.0 Hz, 1 H), 7.51 (d,  $J$  = 7.2 Hz, 1 H), 7.39–7.32 (m, 2 H), 2.22 (t,  $J$  = 18.8 Hz, 3 H);  $^{13}\text{C}$  NMR (150 MHz,  $\text{CDCl}_3$ )  $\delta$  147.9 (t,  $J_{\text{CF}}$  = 32.3 Hz), 142.5, 133.0, 124.9, 123.3, 120.8, 118.0 (t,  $J_{\text{CF}}$  = 234.3 Hz), 116.6, 23.0 (t,  $J_{\text{CF}}$  = 25.8 Hz);  $^{19}\text{F}$  NMR (376 MHz,  $\text{CDCl}_3$ )  $\delta$  -87.4; IR (neat)  $\nu$  = 2852, 1454, 1314, 1277, 1262, 1126, 1015, 995, 741, 660, 578, 555, 461, 417  $\text{cm}^{-1}$ ; HRMS (ESI-TOF) calc'd for  $\text{C}_9\text{H}_9\text{N}_2\text{F}_2$  [ $\text{M}+\text{H}^+$ ] 183.0728; found 183.0735.

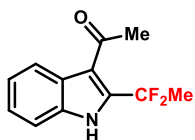

### 1-[2-(1,1-Difluoroethyl)-1H-indol-3-yl]ethanone (**26**).

For 0.20 mmol scale, the standard procedure was followed with a reaction time of 48 h (second addition of reagents was performed after 24 h) to provide **26** in 59% yield as a brown solid. m.p. = 138–139 °C;  $R_f$  = 0.50 (1:3 EtOAc:hexanes);  $^1\text{H}$  NMR (400 MHz,  $\text{CDCl}_3$ )  $\delta$  9.06 (br s, 1 H), 8.01–7.99 (m, 1 H), 7.51–7.46 (m, 1 H), 7.37–7.31 (m, 2 H), 2.75 (s, 3 H), 2.24 (t,  $J$  = 19.2 Hz, 3 H);  $^{13}\text{C}$  NMR (151 MHz,  $\text{CDCl}_3$ )  $\delta$  194.2, 137.4 (t,  $J_{\text{CF}}$  = 30.2 Hz), 133.7, 126.5, 124.3, 123.0, 121.6, 119.8 (t,  $J_{\text{CF}}$  = 238.7 Hz), 115.4, 112.4, 31.9, 24.6 (t,  $J_{\text{CF}}$  = 27.3 Hz);  $^{19}\text{F}$  NMR (376 MHz,  $\text{CDCl}_3$ )  $\delta$  -86.6; IR (neat)  $\nu$  = 3223, 1636, 1530, 1491, 1422, 1325, 1279, 1210, 1133, 930, 741  $\text{cm}^{-1}$ ; HRMS (ESI-TOF) calc'd for  $\text{C}_{12}\text{H}_{12}\text{F}_2\text{NO}$  [ $\text{M}+\text{H}^+$ ] 224.0881; found 224.0883.

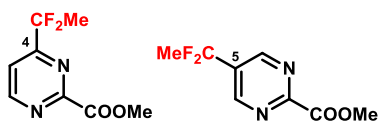

**Methyl 4-(1,1-difluoroethyl)pyrimidine-2-carboxylate (27-C4) and methyl 5-(1,1-difluoroethyl)pyrimidine-2-carboxylate (27-C5).**

For 0.20 mmol scale, the standard procedure was followed with a reaction time of 38 h (Second addition of reagents was performed after 24 h) to provide **27** (**27-C4:27-C5** = 10:1) in 74% combined yield as colorless oils.

**27-C4:**  $R_f$  = 0.75 (2:1 EtOAc:hexanes); <sup>1</sup>H NMR (400 MHz, CDCl<sub>3</sub>) δ 9.08 (br s, 1 H), 7.79 (d,  $J$  = 3.2 Hz, 1 H), 4.05 (s, 3 H), 2.05 (t,  $J$  = 18.8 Hz, 3 H); <sup>13</sup>C NMR (151 MHz, CDCl<sub>3</sub>) δ 164.2 (t,  $J_{CF}$  = 31.7 Hz), 163.4, 159.6, 156.7, 119.7 (t,  $J_{CF}$  = 238.9 Hz), 118.4, 53.8, 22.7 (t,  $J_{CF}$  = 26.1 Hz); <sup>19</sup>F NMR (376 MHz, CDCl<sub>3</sub>) δ -93.2; IR (neat)  $\nu$  = 1742, 1580, 1385, 1293, 1214, 1163, 929, 770, 608 cm<sup>-1</sup>; HRMS (ESI-TOF) calc'd for C<sub>8</sub>H<sub>9</sub>N<sub>2</sub>O<sub>2</sub>F<sub>2</sub> [M+H<sup>+</sup>] 203.0627; found 203.0633.

**27-C5:**  $R_f$  = 0.33 (2:1 EtOAc:hexanes); <sup>1</sup>H NMR (400 MHz, CDCl<sub>3</sub>) δ 9.06 (s, 1 H), 4.10 (s, 3 H), 2.10 (t,  $J$  = 18.4 Hz, 3 H); <sup>13</sup>C NMR (151 MHz, CDCl<sub>3</sub>) δ 163.2, 157.4, 154.9, 133.4 (t,  $J_{CF}$  = 26.0 Hz), 119.7 (t,  $J_{CF}$  = 240.6 Hz), 54.0, 25.9 (t,  $J_{CF}$  = 28.4 Hz); <sup>19</sup>F NMR (376 MHz, CDCl<sub>3</sub>) δ -89.5; IR (neat)  $\nu$  = 1739, 1555, 1428, 1328, 1195, 1136, 914, 712, 643 cm<sup>-1</sup>; HRMS (ESI-TOF) calc'd for C<sub>8</sub>H<sub>9</sub>N<sub>2</sub>O<sub>2</sub>F<sub>2</sub> [M+H<sup>+</sup>] 203.0627; found 203.0632.

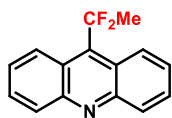

**9-(1,1-Difluoroethyl)acridine (28).**

For 0.20 mmol scale, the standard procedure was followed with a reaction time of 24 h to provide **28** in 72% yield as a brown solid.  $R_f$  = 0.50 (1:4 EtOAc:hexanes); m.p. = 88–90 °C; <sup>1</sup>H NMR (400 MHz, CDCl<sub>3</sub>) δ 8.48–8.45 (m, 2 H), 8.27 (ddd,  $J$  = 9.0 Hz, 1.3 Hz, 0.2 Hz, 2 H), 7.78 (ddd,  $J$  = 8.8 Hz, 6.4 Hz, 1.3 Hz, 2 H), 7.59 (ddd,  $J$  = 9.0 Hz, 6.4 Hz, 1.2 Hz, 2 H), 2.39 (t,  $J$  = 18.2 Hz, 3 H); <sup>13</sup>C NMR (151 MHz, CDCl<sub>3</sub>) δ 149.8, 139.6 (t,  $J_{CF}$  = 23.4 Hz), 131.4, 130.4, 127.7, 126.0 (t,  $J_{CF}$  = 9.8 Hz), 125.2 (t,  $J_{CF}$  = 242.7 Hz), 123.6, 28.3 (t,  $J_{CF}$  = 27.2 Hz); <sup>19</sup>F NMR (376 MHz, CDCl<sub>3</sub>) δ -75.1; IR (neat)  $\nu$  = 1383, 1199,

1163, 1114, 915, 898, 871, 749, 652, 603, 514, 415  $\text{cm}^{-1}$ ; HRMS (ESI-TOF) calc'd for  $\text{C}_{15}\text{H}_{12}\text{NF}_2$   $[\text{M}+\text{H}^+]$  244.0932; found 244.0933.

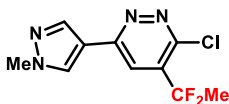

**3-Chloro-4-(1,1-difluoroethyl)-6-(1-methyl-1H-pyrazol-4-yl)pyridazine (29).**

For 0.20 mmol scale, the standard procedure was followed with a reaction time of 40 h (Second addition of reagents was performed after 24 h) to provide **29** in 51% yield as a white solid.  $R_f = 0.25$  (1:1 EtOAc:hexanes); m.p. = 157  $^{\circ}\text{C}$ ;  $^1\text{H}$  NMR (400 MHz,  $\text{CDCl}_3$ )  $\delta$  8.15 (s, 1 H), 8.03 (s, 1 H), 7.73 (s, 1 H), 4.01 (s, 3 H), 2.10 (t,  $J = 18.6$  Hz, 3 H);  $^{13}\text{C}$  NMR (151 MHz,  $\text{CDCl}_3$ )  $\delta$  154.5, 150.1, 138.1, 135.9 (t,  $J_{\text{CF}} = 28.7$  Hz), 130.0, 121.1 (t,  $J_{\text{CF}} = 8.2$  Hz), 119.0 (t,  $J_{\text{CF}} = 243.3$  Hz), 118.7, 39.6, 23.9 (t,  $J_{\text{CF}} = 27.2$  Hz);  $^{19}\text{F}$  NMR (376 MHz,  $\text{CDCl}_3$ )  $\delta$  -92.1; IR (neat)  $\nu = 3012, 3067, 1559, 1512, 1451, 1413, 1387, 1188, 1150, 926, 879, 735, 700, 581, 528, 439, 416$   $\text{cm}^{-1}$ ; HRMS (ESI-TOF) calc'd for  $\text{C}_{10}\text{H}_{10}\text{N}_4\text{F}_2\text{Cl}$   $[\text{M}+\text{H}^+]$  259.0557; found 259.0558.

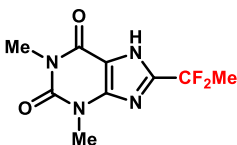

**8-(1,1-Difluoroethyl)-1,3-dimethyl-1H-purine-2,6(3H,7H)-dione (30).**

For 0.20 mmol scale, the standard procedure was followed with a reaction time of 24 h to provide **30** in 90% yield as a white solid: m.p. = 242  $^{\circ}\text{C}$  (decomposed);  $R_f = 0.50$  (1:40 MeOH:DCM, run two times);  $^1\text{H}$  NMR (400 MHz,  $\text{CDCl}_3$ )  $\delta$  3.63 (s, 3 H), 3.48 (s, 3 H), 2.13 (t,  $J = 18.6$  Hz, 3 H);  $^{13}\text{C}$  NMR (151 MHz,  $\text{CDCl}_3$ )  $\delta$  156.1, 151.6, 148.5, 147.4 (t,  $J_{\text{CF}} = 33.5$  Hz), 117.0 (t,  $J_{\text{CF}} = 236.2$  Hz), 107.9, 30.5, 28.6, 23.4 (t,  $J_{\text{CF}} = 23.4$  Hz);  $^{19}\text{F}$  NMR (376 MHz,  $\text{CDCl}_3$ )  $\delta$  -89.1; IR (neat)  $\nu = 2360, 1708, 1648, 1551, 1515, 1453, 1407, 1214, 1056, 994, 790, 762, 747, 509, 495$   $\text{cm}^{-1}$ ; HRMS (ESI-TOF) calc'd for  $\text{C}_9\text{H}_{11}\text{N}_4\text{O}_2\text{F}_2$   $[\text{M}+\text{H}^+]$  245.0845; found 245.0843.

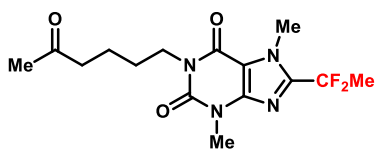

**8-(1,1-Difluoroethyl)-3,7-dimethyl-1-(5-oxohexyl)-1H-purine-2,6(3H,7H)-dione (31).**

For 0.20 mmol scale, the standard procedure was followed with a reaction time of 17 h (second addition of reagents was performed after 14 h) to provide **31** in 45% yield as a white solid: m.p. = 58 °C;  $R_f$  = 0.35 (1:1 EtOAc:hexanes);  $^1\text{H}$  NMR (400 MHz,  $\text{CDCl}_3$ )  $\delta$  4.14 (s, 3 H), 4.00 (t,  $J$  = 6.9 Hz, 2 H), 3.54 (s, 3 H), 2.49 (t,  $J$  = 6.9 Hz, 2 H), 2.25–2.06 (m, 6 H), 1.67–1.63 (m, 4 H);  $^{13}\text{C}$  NMR (151 MHz,  $\text{CDCl}_3$ )  $\delta$  208.8, 155.6, 151.4, 146.5, 145.4 (t,  $J_{\text{CF}}$  = 31.7 Hz), 118.4 (t,  $J_{\text{CF}}$  = 234.7 Hz), 109.4, 43.3, 41.1, 33.5 (t,  $J_{\text{CF}}$  = 3.7 Hz), 30.1, 29.8, 27.5, 23.1 (t,  $J_{\text{CF}}$  = 25.0 Hz), 21.1;  $^{19}\text{F}$  NMR (376 MHz,  $\text{CDCl}_3$ )  $\delta$  -87.5; IR (neat)  $\nu$  = 2953, 1707, 1664, 1607, 1543, 1215, 1170, 917, 897, 465, 431  $\text{cm}^{-1}$ ; HRMS (ESI-TOF) calc'd for  $\text{C}_{15}\text{H}_{21}\text{N}_4\text{O}_3\text{F}_2$  [ $\text{M}+\text{H}^+$ ] 343.1576; found 343.1590.

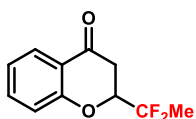

**2-(1,1-Difluoroethyl)chroman-4-one (32).**

For 0.20 mmol scale, the standard procedure was followed with a reaction time of 34 h (second addition of reagents was performed after 17 h) to provide **32** in 26% yield as a pale yellow solid: m.p. = 56 °C;  $R_f$  = 0.23 (1:4 EtOAc:hexanes);  $^1\text{H}$  NMR (400 MHz,  $\text{CDCl}_3$ )  $\delta$  7.97–7.84 (m, 1 H), 7.52 (dd,  $J$  = 8.1, 7.2, 1 H), 7.12–7.00 (m, 2 H), 4.55 (tdd,  $J$  = 13.1, 5.3, 3.8 Hz, 1 H), 3.04–2.78 (m, 2 H), 1.83 (t,  $J$  = 19.0 Hz, 3 H);  $^{13}\text{C}$  NMR (151 MHz,  $\text{CDCl}_3$ )  $\delta$  190.4, 160.2, 136.5, 127.2, 122.4, 121.2 (dd,  $J_{\text{CF}}$  = 243.0 Hz, 238.5 Hz), 120.9, 118.0, 78.0 (dd,  $J_{\text{CF}}$  = 35.3 Hz, 29.3 Hz), 36.5, 20.2 (t,  $J_{\text{CF}}$  = 26.3 Hz);  $^{19}\text{F}$  NMR (376 MHz,  $\text{CDCl}_3$ )  $\delta$  -101.1 (d,  $J$  = 255.2 Hz), -105.5 (d,  $J$  = 255.2 Hz); IR (neat)  $\nu$  = 1697, 1604, 1577, 1460, 1392, 1300, 1273, 1139, 1110, 1087, 804, 765, 721, 653, 638, 594, 414  $\text{cm}^{-1}$ ; HRMS (ESI-TOF) calc'd for  $\text{C}_{11}\text{H}_{11}\text{O}_2\text{F}_2$  [ $\text{M}+\text{H}^+$ ] 213.0722; found

213.0725.

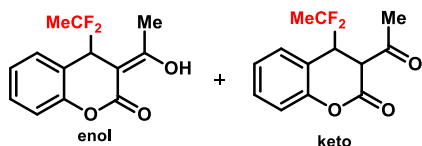

**(Z)-4-(1,1-Difluoroethyl)-3-(1-hydroxyethylidene)chroman-2-one (33-enol) and 3-acetyl-4-(1,1-difluoroethyl)chroman-2-one (33-keto).**

For 0.20 mmol scale, the standard procedure was followed with a reaction time of 38 h (second addition of reagents was performed after 24 h) to provide **33 (enol + keto)** in 83% yield as a pink solid: m.p. = 93 °C (Note: Both major (enol) and minor (keto) peaks are listed for  $^1\text{H}$  and  $^{13}\text{C}$  NMR.)  $^1\text{H}$  NMR (400 MHz,  $\text{CDCl}_3$ )  $\delta$  13.49 (s, 1 H), 7.40–7.28 (m, 3 H), 7.18 (td,  $J = 7.6, 1.1$  Hz, 2 H), 7.12 (d,  $J = 8.2$  Hz, 1 H), 7.08 (d,  $J = 8.2$  Hz, 1 H), 4.19 (s, 1 H), 4.12 (dd,  $J = 11.4, 9.3$  Hz, 2 H), 3.86 (dd,  $J = 20.6, 7.7$  Hz, 1 H), 2.31 (s, 1 H), 2.24 (s, 5 H), 1.61 (t,  $J = 18.9$  Hz, 2 H), 1.42 (t,  $J = 18.7$  Hz, 5 H);  $^{13}\text{C}$  NMR (151 MHz,  $\text{CDCl}_3$ )  $\delta$ ; 197.7, 181.0, 169.6, 164.2, 151.0, 130.7, 130.4, 130.1, 130.1, 129.9, 126.6, 125.2, 123.3, 119.2, 117.5, 117.2, 116.6, 90.6, 90.6, 54.4, 45.2 (t,  $J = 27.3$  Hz), 30.4, 28.2, 26.1, 21.5 (t,  $J = 27.0$  Hz), 19.8, 19.8, 19.6 (t,  $J = 27.1$  Hz);  $^{19}\text{F}$  NMR (376 MHz,  $\text{CDCl}_3$ )  $\delta$  -94.2 (AB system,  $J = 1345.6$  Hz, 237.1 Hz, 2 F), -95.3 (AB system,  $J = 1342.8$  Hz, 244.8 Hz, 2 F); IR (neat)  $\nu = 2925, 1657, , 1321, 1243, 1216, 1180, 1144, 1108, 953, 923, 754, 724, 618, 524, 466, 418$   $\text{cm}^{-1}$ ; HRMS (ESI-TOF) calc'd for  $\text{C}_{13}\text{H}_{13}\text{O}_3\text{F}_2$   $[\text{M}+\text{H}^+]$  255.0827; found 255.0830.

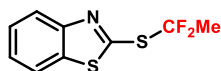

**2-[(1,1-Difluoroethyl)thio]benzothiazole (34).**

For 0.20 mmol scale, the standard procedure was followed with a reaction time of 5 h to provide **34** in 66% yield as a colorless oil:  $R_f = 0.53$  (1:2 EtOAc:hexanes);  $^1\text{H}$  NMR (400 MHz,  $\text{CDCl}_3$ )  $\delta$  8.08 (ddd,  $J = 8.3$  Hz, 1.1 Hz, 0.5 Hz, 1 H), 7.87 (ddd,  $J = 8.1$  Hz, 1.2 Hz, 0.4 Hz, 1 H), 7.51 (ddd,  $J = 8.3$  Hz, 7.1 Hz, 1.2 Hz, 1 H), 7.44 (ddd,  $J = 8.1$  Hz, 7.1 Hz, 1.1 Hz, 1 H), 2.13 (t,  $J = 17.0$  Hz, 3 H);  $^{13}\text{C}$  NMR (151 MHz,  $\text{CDCl}_3$ )  $\delta$  156.8 (t,  $J_{\text{CF}} =$

2.6 Hz), 153.9, 138.4, 128.8 (t,  $J_{CF} = 278.5$  Hz), 127.4, 126.8, 124.4, 122.0, 27.4 (t,  $J_{CF} = 24.8$  Hz);  $^{19}\text{F}$  NMR (376 MHz,  $\text{CDCl}_3$ )  $\delta -64.2$ ; IR (neat)  $\nu = 1454, 1417, 1382, 1311, 1238, 1186, 1122, 1078, 989, 932, 877, 756, 726, 707, 679, 660, 607, 547, 519, 461, 421$   $\text{cm}^{-1}$ ; HRMS (ESI-TOF) calc'd for  $\text{C}_9\text{H}_8\text{NS}_2\text{F}_2$  [ $\text{M}+\text{H}^+$ ] 232.0061; found 232.0065.

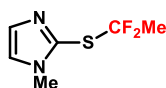

### 2-[(1,1-Difluoroethyl)thio]-1-methylimidazole (35).

For 0.20 mmol scale, the standard procedure was followed with a reaction time of 5 h to provide **35** in 37% yield as a colorless oil:  $R_f = 0.15$  (1:2 DCM:hexanes);  $^1\text{H}$  NMR (400 MHz,  $\text{CDCl}_3$ )  $\delta$  7.20 (d,  $J = 0.8$  Hz, 1 H), 7.12 (d,  $J = 0.8$  Hz, 1 H), 3.78 (s, 3 H), 1.95 (t,  $J = 17.2$  Hz, 3 H);  $^{13}\text{C}$  NMR (151 MHz,  $\text{CDCl}_3$ )  $\delta$  133.4, 131.0, 128.6 (t,  $J_{CF} = 277.5$  Hz), 125.1, 34.5, 26.3 (t,  $J_{CF} = 25.5$  Hz);  $^{19}\text{F}$  NMR (376 MHz,  $\text{CDCl}_3$ )  $\delta -65.2$ ; IR (neat)  $\nu = 1457, 1412, 1384, 1281, 1184, 1117, 930, 878, 757, 686, 659, 553, 497, 452, 432, 405$   $\text{cm}^{-1}$ ; HRMS (ESI-TOF) calc'd for  $\text{C}_6\text{H}_9\text{N}_2\text{SF}_2$  [ $\text{M}+\text{H}^+$ ] 179.0449; found 179.0446.

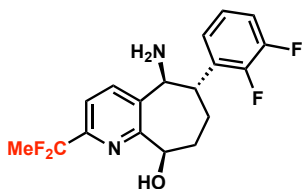

### (5S,6S,9R)-5-Amino-2-(1,1-difluoroethyl)-6-(3,4-difluorophenyl)-6,7,8,9-tetrahydro-5H-cycloheptapyridin-9-ol (37).

For 0.20 mmol scale, the standard procedure was followed with a reaction time of 22 h to provide **37** in 33% yield as a light yellow solid:  $R_f = 0.23$  (1:1 EtOAc:hexanes); m.p. = 115 °C;  $^1\text{H}$  NMR (400 MHz,  $\text{CDCl}_3$ )  $\delta$  8.17 (d,  $J = 8.0$  Hz, 1 H), 7.65 (d,  $J = 8.0$  Hz, 1 H), 7.12–7.07 (m, 2 H), 7.01–6.99 (m, 1 H), 4.99 (dd,  $J = 11.0$  Hz, 2.2 Hz, 1 H), 4.45 (d,  $J = 9.0$  Hz, 1 H), 2.91 (m, 1 H), 2.37–2.28 (m, 2 H), 2.05 (t,  $J = 18.6$  Hz, 3 H), 1.61–1.52 (m, 1 H);  $^{13}\text{C}$  NMR (151 MHz,  $\text{CDCl}_3$ )  $\delta$  159.2, 151.4 (t,  $J_{CF} = 30.8$  Hz), 151.1 (dd,  $J_{CF} = 249.3, 13.6$  Hz), 148.8 (dd,  $J_{CF} = 246.3, 12.8$  Hz), 138.9, 134.8, 133.3 (d,  $J_{CF} = 11.2$  Hz),

124.8 (dd,  $J_{CF} = 6.7, 4.4$  Hz), 123.9 , 120.8 (t,  $J_{CF} = 238.3$  Hz), 118.6 (t,  $J_{CF} = 4.1$  Hz), 115.9 (d,  $J_{CF} = 17.1$  Hz), 71.2 , 54.2 , 45.4 , 35.7 , 33.5 , 23.4 (t,  $J_{CF} = 27.5$  Hz);  $^{19}\text{F}$  NMR (376 MHz,  $\text{CDCl}_3$ )  $\delta$  -90.6, -137.2 (d,  $J = 21.4$  Hz), -142.5 (d,  $J = 21.9$  Hz); IR (neat)  $\nu = 3424, 2928, 2853, 1714, 1592, 1484, 1378, 1323, 1289, 1228, 1175, 997, 953, 821, 802, 780, 649, 616, 592, 565, 422$   $\text{cm}^{-1}$ ; HRMS (ESI-TOF) calc'd for  $\text{C}_{18}\text{H}_{19}\text{N}_2\text{OF}_4$   $[\text{M}+\text{H}^+]$  355.1428; found 355.1436.

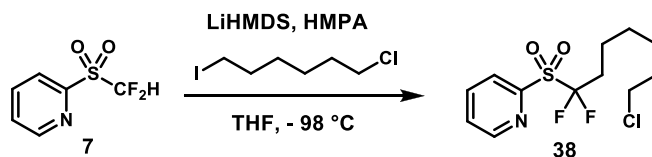

### 2-((7-Chloro-1,1-difluoroheptyl)sulfonyl)pyridine (**38**).

2-((7-Chloro-1,1-difluoroheptyl)sulfonyl)pyridine (**38**) was prepared using the alkylation procedure of Prakash et al. (see Prakash, G. K. S.; Ni, C.; Wang, F.; Hu, J.; Olah, G. A. *Angew. Chem. Int. Ed.* **2011**, *50*, 2559-2563). HMPA (2.5 mL) was added under Ar atmosphere to a solution of 2-(difluoromethylsulfonyl)pyridine (**7**) (1.12 g, 5.8 mmol, 1.0 equiv) in THF (25 mL) in a 200 mL flask. The reaction mixture was cooled to  $-98$  °C (MeOH/liquid  $\text{N}_2$  bath) and 1-chloro-6-iodohexane (2.3 mL, 15.5 mmol, 2.5 equiv) was added. Then a THF solution of LiHMDS (1 M, 17.4 mL, 3.0 equiv) was added dropwise over 10 min and the reaction mixture was kept at  $-98$  °C for 20 min. The reaction was quenched with saturated aqueous  $\text{NH}_4\text{Cl}$  solution (4.5 mL) at the same temperature. After removal of the ice bath,  $\text{H}_2\text{O}$  (30 mL) was added. The mixture was extracted with EtOAc (3  $\times$  35 mL), and the combined organic phase was dried over  $\text{MgSO}_4$ . After the removal of solvents under reduced pressure, the crude product was purified by flash column chromatography (EtOAc:hexane, from 1:10 to 1:4) to give **38** as a colorless oil (1.23 g, 3.94 mmol, 68% yield).  $R_f = 0.4$  (1:2 EtOAc:hexanes);  $^1\text{H}$  NMR (400 MHz,  $\text{CDCl}_3$ )  $\delta$  8.86 (ddd,  $J = 4.7, 1.7, 0.9$  Hz, 1 H), 8.22–8.11 (m, 1 H), 8.03 (td,  $J = 7.8, 1.7$  Hz, 1 H), 7.66 (ddd,  $J = 7.7, 4.7, 1.2$  Hz, 1 H), 3.52 (t,  $J = 6.6$  Hz, 2 H), 2.47–2.34 (m, 2 H), 1.81–1.74 (m, 2 H), 1.72–1.64 (m, 2 H), 1.52–1.39 (m, 4 H);  $^{13}\text{C}$  NMR (151 MHz,  $\text{CDCl}_3$ )  $\delta$  152.5, 151.0, 138.4, 128.7, 126.5 125.4 (t,  $J_{CF} = 287.4$  Hz), 45.0, 32.4, 30.1 (t,  $J_{CF} = 19.8$  Hz), 28.5, 26.5, 20.8 (t,  $J_{CF} = 3.3$  Hz);  $^{19}\text{F}$  NMR (376 MHz,  $\text{CDCl}_3$ )  $\delta$  -102.4; IR (neat)  $\nu$

= 2924, 2359, 2340, 1345, 1169, 982, 744, 598  $\text{cm}^{-1}$ ; HRMS (ESI-TOF) calc'd for  $\text{C}_{12}\text{H}_{17}\text{NO}_2\text{F}_2\text{SCl}$   $[\text{M}+\text{H}^+]$  312.0631; found 312.0634.

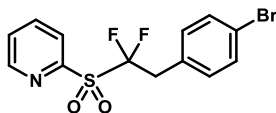

### 2-((2-(*p*-Bromophenyl)-1,1-difluoroethyl)sulfonyl)pyridine (**39**)

2-((2-(*p*-Bromophenyl)-1,1-difluoroethyl)sulfonyl)pyridine (**39**) was prepared using the alkylation procedure of Prakash et al. (see Prakash, G. K. S.; Ni, C.; Wang, F.; Hu, J.; Olah, G. A. *Angew. Chem. Int. Ed.* **2011**, *50*, 2559-2563). HMPA (3 mL) was added under Ar atmosphere to a mixture of 2-(difluoromethylsulfonyl)pyridine (**7**) (760 mg, 3.93 mmol, 1.3 equiv) and 1-bromo-4-(bromomethyl)benzene (746 mg, 3.02 mmol, 1.0 equiv) in THF (33 mL) in a 100 mL flask. The reaction mixture was cooled to  $-98^{\circ}\text{C}$  using MeOH/liquid  $\text{N}_2$  bath and a THF solution of LiHMDS (1M, 4.5 mL, 1.5 equiv) was added dropwise over 20 min. The reaction mixture was kept at  $-98^{\circ}\text{C}$  for 2 h, then was quenched with saturated aqueous  $\text{NH}_4\text{Cl}$  solution (4.5 mL) at the same temperature. After removal of the cold bath,  $\text{H}_2\text{O}$  (30 mL) was added. The mixture was extracted with EtOAc ( $3 \times 35$  mL), and the combined organic phase was dried over  $\text{MgSO}_4$ . After the removal of solvents under reduced pressure, the crude product was purified by flash column chromatography (EtOA:hexanes, from 1:10 to 1:4) to give (**39**) as a white solid (848 mg, 2.36 mmol, 78% yield). The spectroscopic data for this compound were identical to those reported in the literature: Prakash, G. K. S.; Ni, C.; Wang, F.; Hu, J.; Olah, G. A. *Angew. Chem. Int. Ed.* **2011**, *50*, 2559–2563.



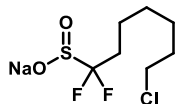

### Sodium 7-chloro-1,1-difluoroheptanesulfinate (**40**)

For 3.75 mmol scale, the same procedure for the preparation of **9** was followed to provide **40** in 85% yield as a white solid:  $R_f = 0.70$  (1:2 MeOH:DCM); m.p. = 150–155 °C;  $^1\text{H}$  NMR (400 MHz,  $\text{D}_2\text{O}$ )  $\delta$  3.63 (t,  $J = 6.7$  Hz, 2 H), 2.07–1.94 (m, 2 H), 1.83–1.76 (m, 2 H), 1.61–1.54 (m, 2 H), 1.51–1.39 (m, 4 H);  $^{13}\text{C}$  NMR (151 MHz,  $\text{D}_2\text{O}$ )  $\delta$  128.4 (t,  $J_{\text{CF}} = 284.4$  Hz), 46.5, 32.5, 28.9 (t,  $J_{\text{CF}} = 20.7$  Hz), 28.7, 26.6, 21.0 (t,  $J_{\text{CF}} = 4.1$  Hz);  $^{19}\text{F}$  NMR (376 MHz,  $\text{D}_2\text{O}$ )  $\delta$  -115.4; IR (neat)  $\nu = 2936, 2857, 1193, 1157, 1072, 1030, 1009, 938, 725, 585$   $\text{cm}^{-1}$ ; elemental analysis calc'd for:  $\text{C}_7\text{H}_{12}\text{O}_2\text{F}_2\text{NaSCl}$  (256.67), calcd: C, 32.76%; H, 4.71%; S, 12.49%; found: C, 32.87%; H, 4.79%; S, 12.74%.

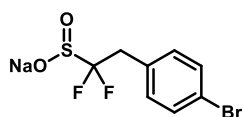

### Sodium 2-(4-bromophenyl)-1,1-difluoroethanesulfinate (**41**)

For 2.5 mmol scale, the same procedure for the preparation of **9** was followed to provide sodium 2-(4-bromophenyl)-1,1-difluoroethanesulfinate (**41**) in 60% yield as a white solid: m.p. > 300 °C;  $R_f = 0.39$  (1:4 MeOH:DCM);  $^1\text{H}$  NMR (600 MHz,  $\text{D}_2\text{O}$ )  $\delta$  7.56 (d,  $J = 8.4$  Hz, 2 H), 7.29 (d,  $J = 8.1$  Hz, 2 H), 3.29 (t,  $J = 18.9$  Hz, 2 H);  $^{13}\text{C}$  NMR (151 MHz,  $\text{D}_2\text{O}$ )  $\delta$  133.4, 132.3, 131.6, 126.5 (t,  $J_{\text{CF}} = 287.1$  Hz), 121.8, 34.1 (t,  $J_{\text{CF}} = 20.8$  Hz);  $^{19}\text{F}$  NMR (376 MHz,  $\text{D}_2\text{O}$ )  $\delta$  -114.3. IR (neat)  $\nu = 3409, 2936, 1487, 1428, 1405, 1322, 1222, 1168, 1052, 991, 871, 837, 805, 716, 599, 547, 475$   $\text{cm}^{-1}$ ; elemental analysis calc'd for:  $\text{C}_8\text{H}_6\text{BrF}_2\text{NaO}_2\text{S}$  (305.91), calcd: C, 31.39%; H, 1.97%; S, 10.44%; found: C, 31.63%; H, 2.0%; S, 10.56%.

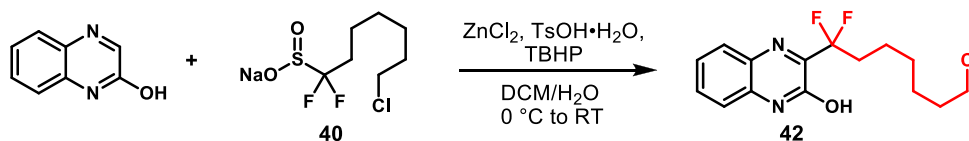

### 3-(1,1-Difluoro-6-chloroheptyl)quinoxalin-2-ol (**42**).

To a solution of 2-quinoxalinol (29.2 mg, 0.20 mmol, 1.0 equiv), sodium 7-chloro-1,1-difluoroheptanesulfinate (**40**, 102.7 mg, 0.40 mmol, 2.0 equiv) and  $\text{ZnCl}_2$  (27.3 mg, 0.2 mmol, 1.0 equiv) in DCM (0.8 mL) and  $\text{H}_2\text{O}$  (0.32 mL) was added  $\text{TsOH}\cdot\text{H}_2\text{O}$  (38.0 mg, 0.20 mmol, 1.0 equiv). The reaction mixture was cooled (ice bath) and TBHP (70% solution in water, 0.138 mL, 1.0 mmol, 5.0 equiv) was added with vigorous stirring and the stirring was continued at this temperature for 5 min. The reaction was warmed to room temperature and monitored by TLC until completion. Upon consumption of the starting material, the reaction was partitioned between DCM (2.0 mL) and saturated aqueous  $\text{NaHCO}_3$  (2.0 mL). The organic layer was separated, and the aqueous layer was extracted with DCM (3  $\times$  2.0 mL). The combined organic layers was dried over  $\text{Na}_2\text{SO}_4$ , concentrated in vacuum and purified with column chromatography to provide **42** in 83% yield as a white solid:  $R_f$  = 0.60 (1:1 EtOAc:hexanes); m.p. = 118–120 °C;  $^1\text{H}$  NMR (400 MHz,  $\text{CDCl}_3$ )  $\delta$  7.97 (dd,  $J$  = 8.2, 1.3 Hz, 1 H), 7.64 (ddd,  $J$  = 8.4, 7.2, 1.4 Hz, 1 H), 7.52–7.32 (m, 2 H), 3.52 (t,  $J$  = 6.7 Hz, 2 H), 2.59–2.47 (m, 2 H), 1.81–1.74 (m, 2 H), 1.65–1.58 (m, 2 H), 1.52–1.40 (m, 4 H);  $^{13}\text{C}$  NMR (151 MHz,  $\text{CDCl}_3$ )  $\delta$  154.7, 150.6 (t,  $J_{\text{CF}}$  = 27.5 Hz), 132.6, 132.1, 131.6, 130.3, 125.0, 120.4 (t,  $J_{\text{CF}}$  = 244.5 Hz), 116.1, 45.1, 35.0 (t,  $J_{\text{CF}}$  = 23.9 Hz), 32.5, 28.7, 26.7, 22.0 (t,  $J_{\text{CF}}$  = 3.9 Hz);  $^{19}\text{F}$  NMR (376 MHz,  $\text{CDCl}_3$ )  $\delta$  -101.9; IR (neat)  $\nu$  = 2934, 2853, 1668, 1609, 1161, 1025, 970, 909, 763, 718, 635, 589, 481, 466  $\text{cm}^{-1}$ ; HRMS (ESI-TOF) calc'd for  $\text{C}_{15}\text{H}_{18}\text{N}_2\text{OF}_2\text{Cl}$  [ $\text{M}+\text{H}^+$ ] 315.1070; found 315.1073.

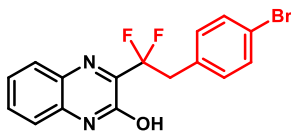

### 3-(2-(4-Bromophenyl)-1,1-difluoroethyl)quinoxalin-2-ol (**43**)

To a solution of 2-quinoxalinol (14.6 mg, 0.10 mmol, 1.0 equiv), sodium 2-(4-bromophenyl)-1,1-difluoroethanesulfinate (**41**, 46 mg, 0.14 mmol, 1.5 equiv) and  $\text{ZnCl}_2$  (20.0 mg, 0.14 mmol, 1.5 equiv) in DCM (0.3 mL) and water (0.12 mL) was added  $\text{TsOH}\cdot\text{H}_2\text{O}$  (19.0 mg, 0.10 mmol, 1.0 equiv). The reaction mixture was cooled in ice and TBHP (70% solution in water, 0.068 mL, 0.5 mmol, 5.0 equiv) was added with vigorous

stirring and the stirring was continued at this temperature for 2 h. Then, a second addition of sodium 2-(4-bromophenyl)-1,1-difluoroethanesulfinate (**41**) (46 mg, 0.14 mmol, 1.5 equiv) and TBHP (70% solution in water, 0.068 mL, 0.5 mmol, 5.0 equiv) was performed to drive the reaction further. After 2 h the reaction mixture was warmed to room temperature and upon consumption of the starting material (10–15 min) the reaction was immediately partitioned between EtOAc (2.0 mL) and saturated NaHCO<sub>3</sub> (2.0 mL). The organic layer was separated, and the aqueous layer was extracted with EtOAc (3 × 2.0 mL). The combined organic layers was dried over Na<sub>2</sub>SO<sub>4</sub>, concentrated in vacuum and purified with preparative TLC (1:1 EtOAc:hexane) to provide **43** in 56% yield as a white solid: m.p. = 240 °C; *R<sub>f</sub>* = 0.48 (1:1 EtOAc/hexanes); <sup>1</sup>H NMR (600 MHz, acetone-*d*<sub>6</sub>) δ 7.82 (dd, *J* = 8.1, 1.4 Hz, 1 H), 7.65 (ddd, *J* = 8.4, 7.3, 1.4 Hz, 1 H), 7.50–7.44 (m, 3 H), 7.38 (ddd, *J* = 8.4, 7.3, 1.3 Hz, 1 H), 7.30 (d, *J* = 8.3 Hz, 2 H), 3.86 (t, *J* = 17.2 Hz, 2 H); <sup>13</sup>C NMR (151 MHz, acetone-*d*<sub>6</sub>) δ 153.4, 151.7 (t, *J*<sub>CF</sub> = 25.9 Hz), 134.0, 133.6, 133.1, 133.0 (t, *J*<sub>CF</sub> = 4.5 Hz), 132.2, 131.7, 130.7, 124.8, 121.8, 119.5 (t, *J*<sub>CF</sub> = 245.6 Hz), 116.3, 41.2 (t, *J*<sub>CF</sub> = 24.8 Hz); <sup>19</sup>F NMR (376 MHz, acetone-*d*<sub>6</sub>) δ –100.1; IR (neat) = 2917, 2836, 1665, 1608, 1565, 1484, 1404, 1337, 1212, 1166, 975, 916, 894, 757, 648, 589, 528 cm<sup>-1</sup>; HRMS (ESI-TOF) calc'd for C<sub>16</sub>H<sub>11</sub>N<sub>2</sub>OF<sub>2</sub>Br [M+H<sup>+</sup>] 365.0096; found 365.0101.

### Quantum mechanical analysis for anisole

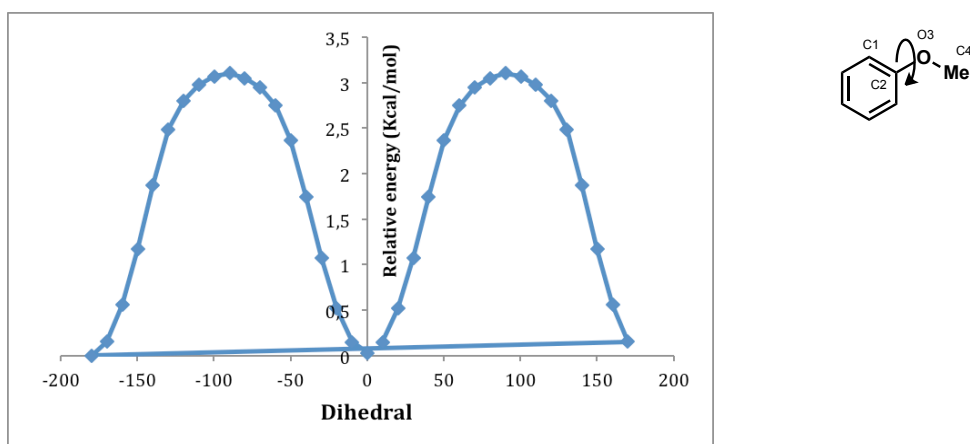

**Figure 1:** Full QM conformational scan with 10° dihedral increment around C1-C2-O3-C4 of anisole. Minimum energy conformation suggests that the methyl group is in plane

with the benzene ring. B3LYP method with 6-31G\*\* basis set was used for QM calculations.

### Quantum mechanical analysis for difluoroethylbenzene

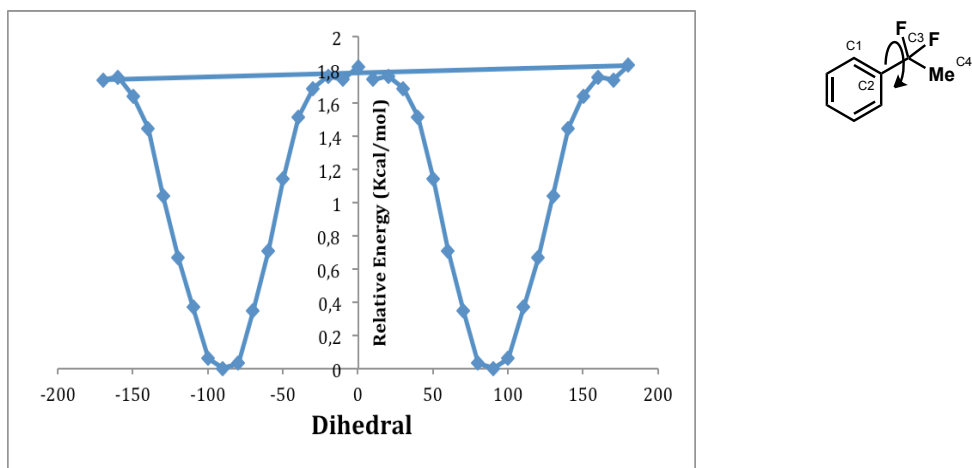

**Figure 2:** Full conformational scan with 10° dihedral increment around C1-C2-C3-C4 of difluoroethylbenzene. Minimum energy conformation suggests that the methyl group is out of plane (~90°) with the benzene ring unlike anisole. B3LYP method with 6-31G\*\* basis set was used for QM calculations.

### Quantum mechanical electrostatic potential surfaces of anisole and difluoroethylbenzene

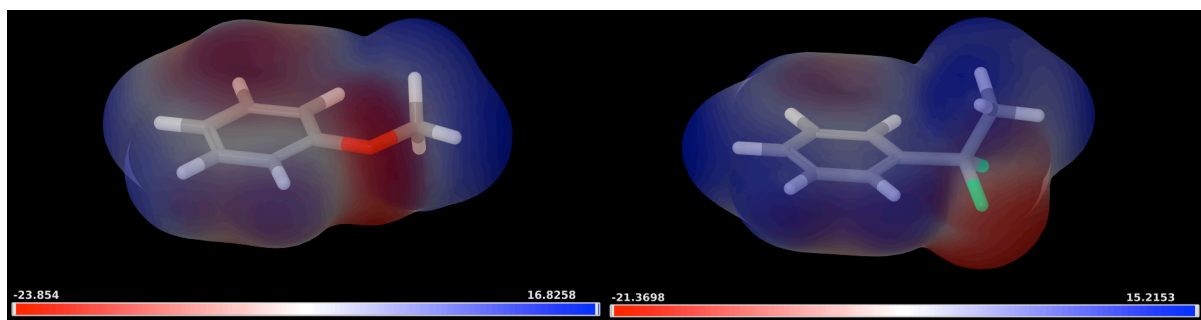

**Figure 3:** Red represents regions of relatively negative electrostatic potential, while blue represents regions of positive electrostatic potential. Left: Dark red patches observed over the  $\pi$ -system of ring and the methoxy oxygen in anisole. Right: A relatively weaker red patch is observed around the  $\pi$ -system due to the inductive effect of the fluorine atoms in di-fluoroethylbenzene system. The color scale below the images shows the range of electrostatic potential values in au.

3-57-p-other-H/1  
 H-1 Reference Experiment 130  
 8.847, 8.844, 8.832, 8.833, 8.821, 8.821, 8.180, 8.180, 8.180, 8.182, 8.182, 8.179, 8.176, 8.176, 8.060, 8.057, 8.056, 8.041, 8.037, 8.021, 8.017, 7.689, 7.686, 7.678, 7.675, 7.670, 7.667, 7.658, 7.655

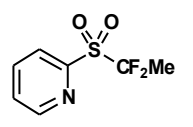

8

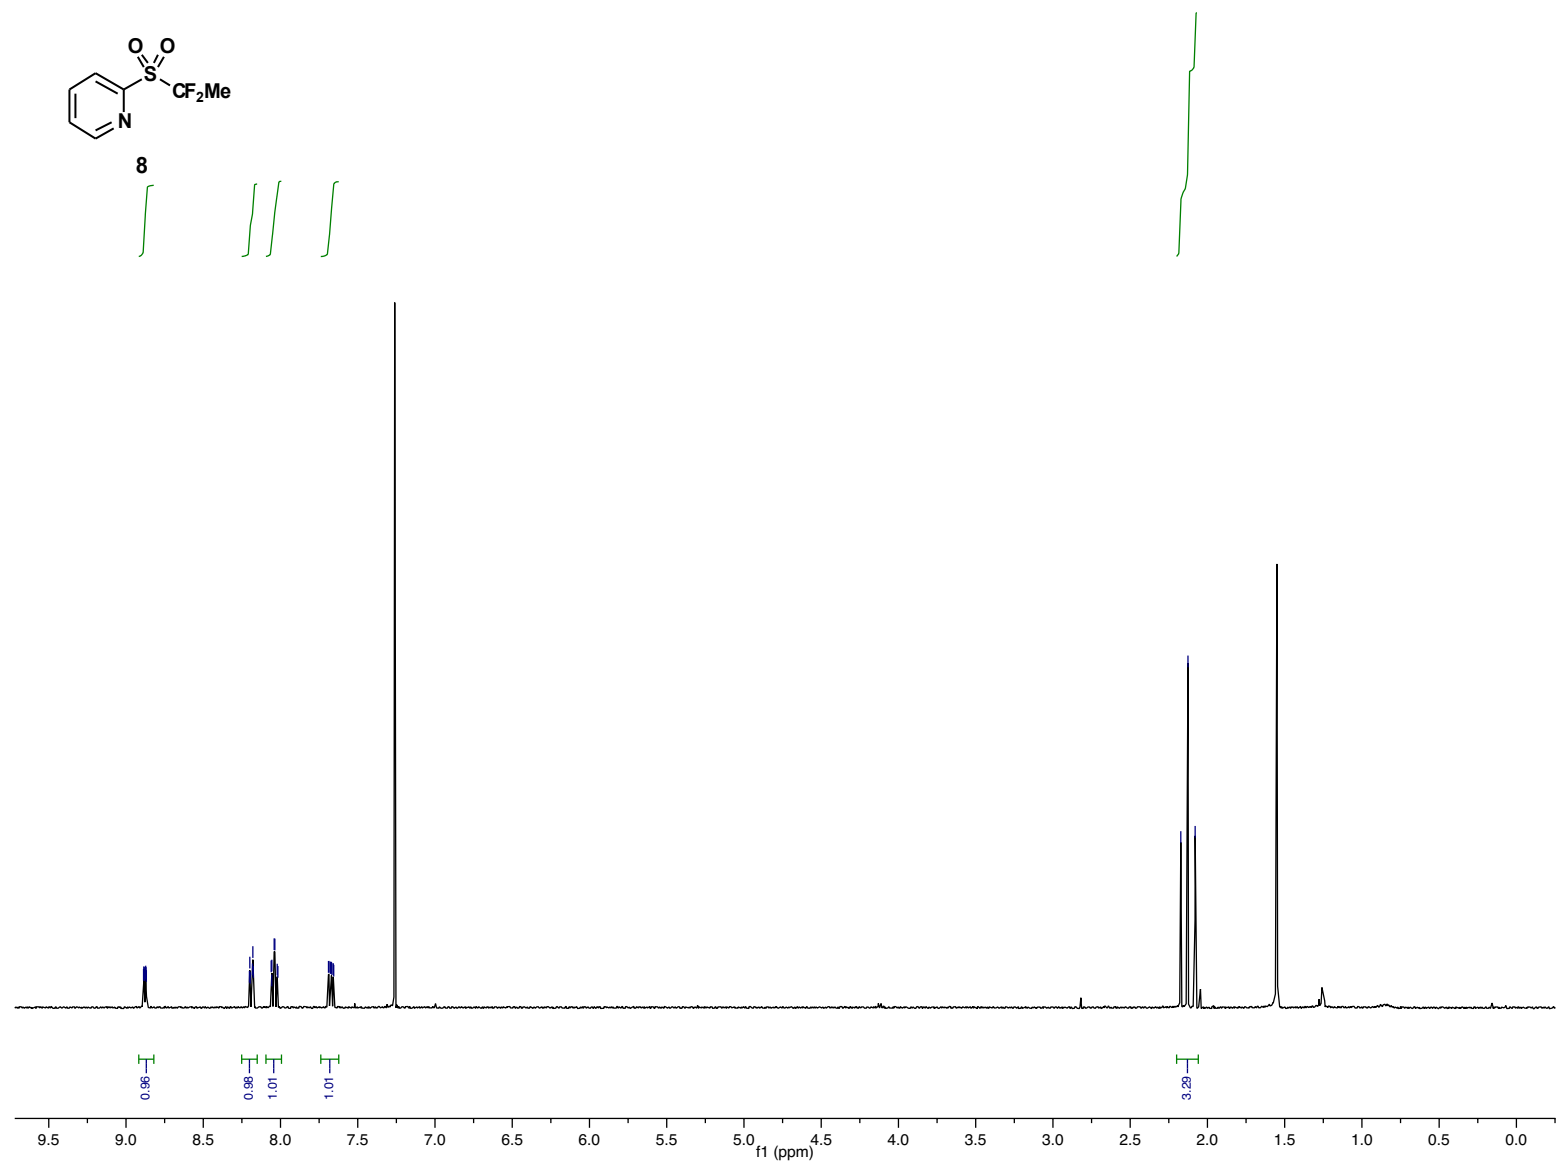

3-57-p-other-13C/1  
C-13 Routine 1D experiment. BBBO Probe, 9-13-2008

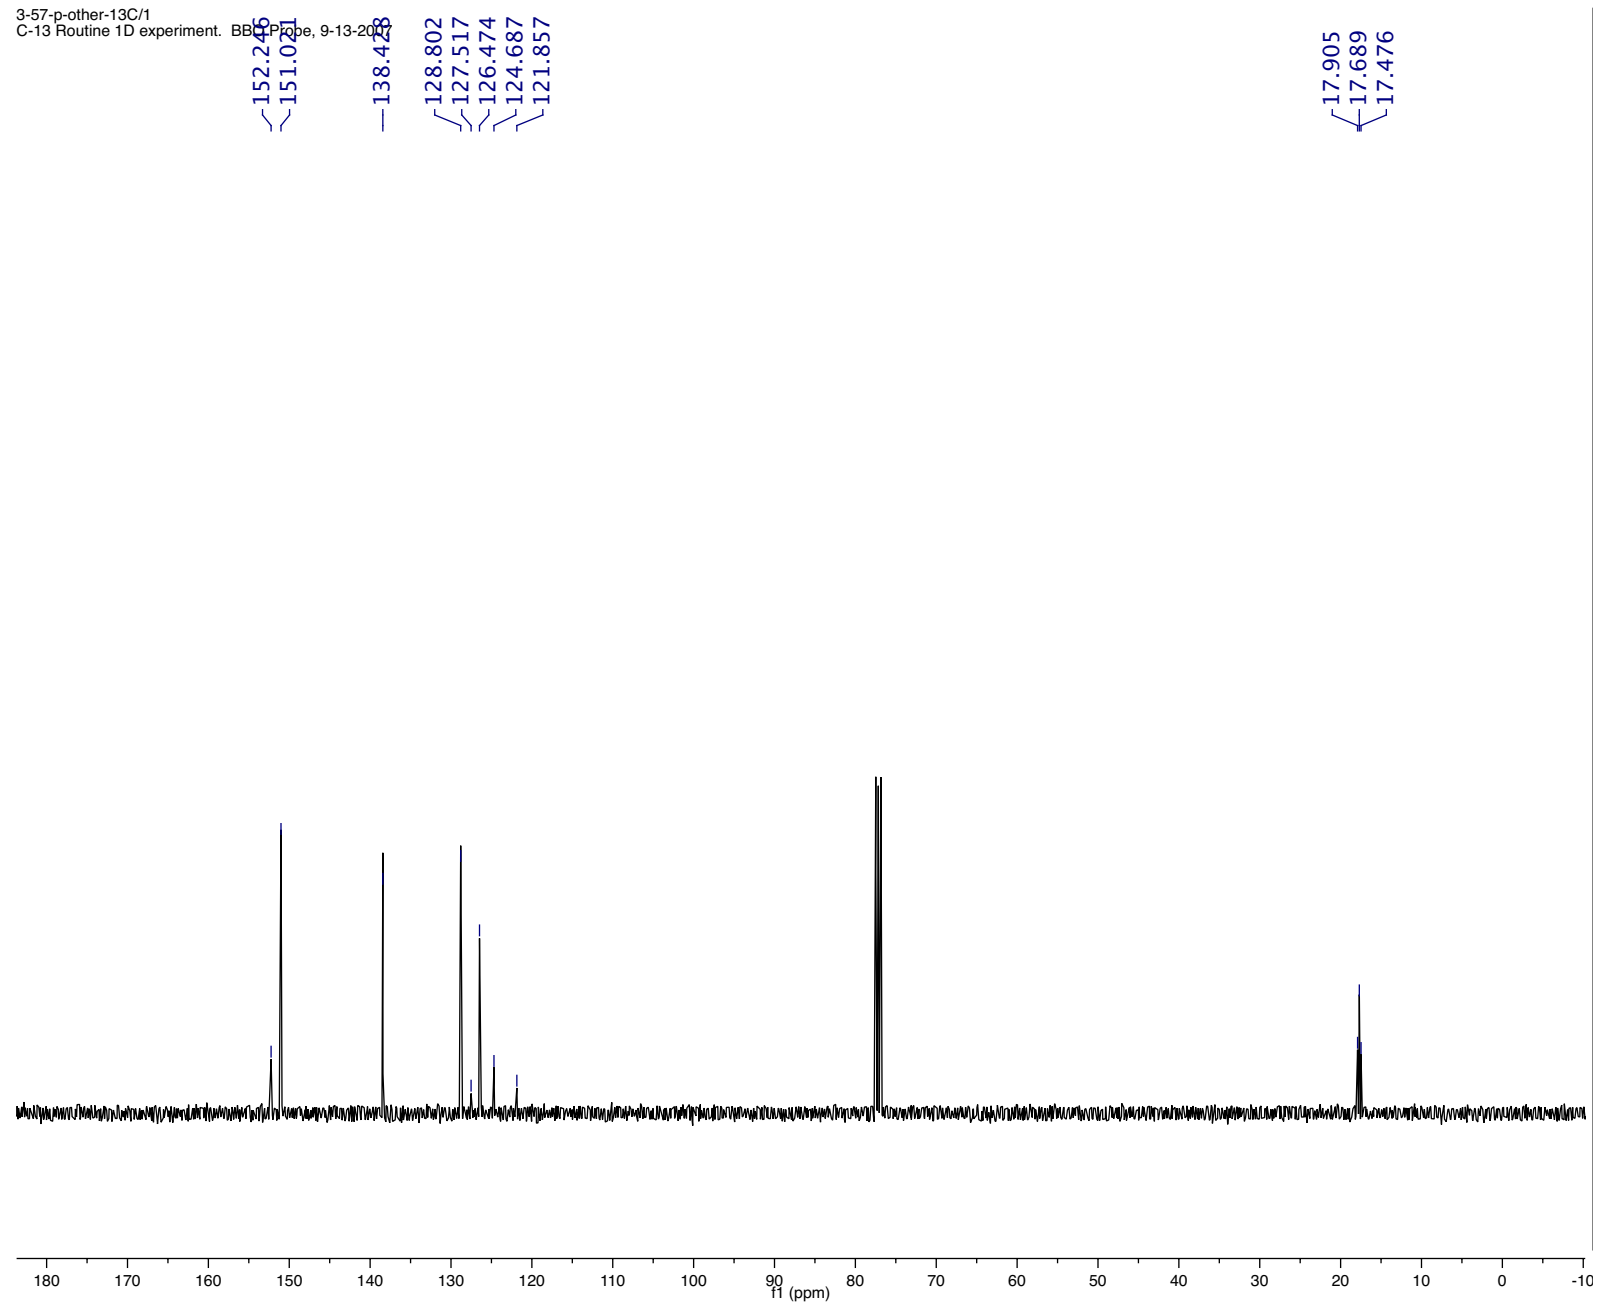

SI-31

3-57-pure-F1  
F-19, CDCl<sub>3</sub>, DPX-400 QNP Probe. CF<sub>3</sub>Cl as Ref at 0 ppm.

---96.048

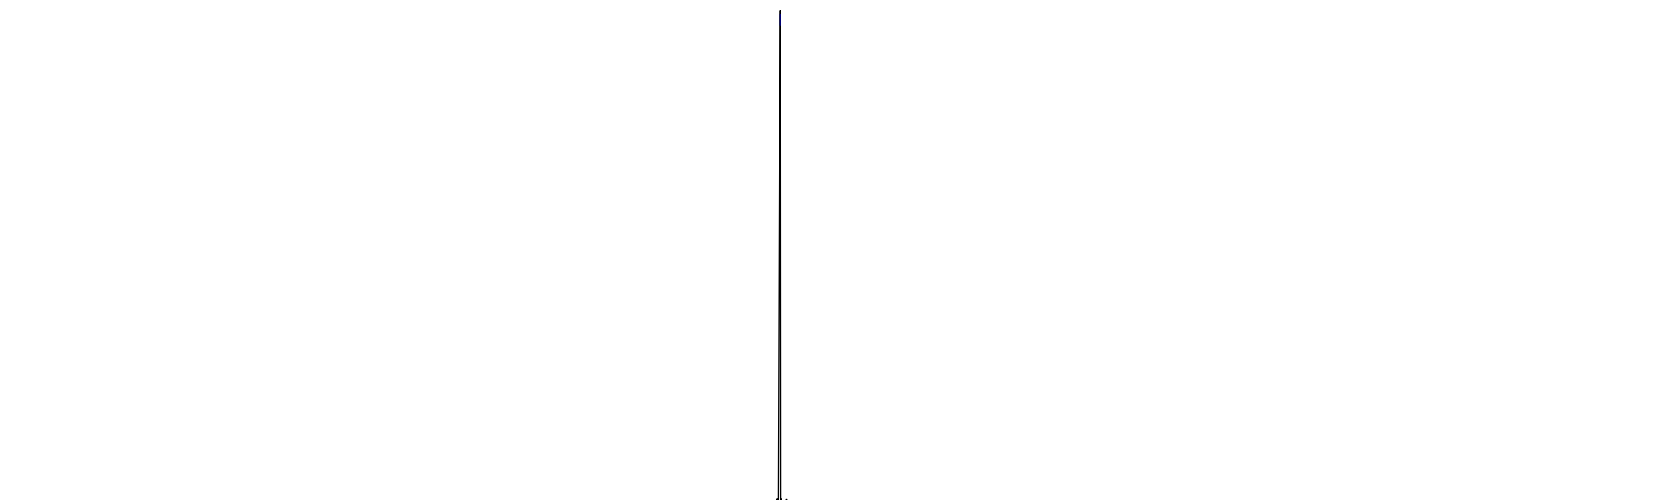

-35 -40 -45 -50 -55 -60 -65 -70 -75 -80 -85 -90 -95 -100 -105 -110 -115 -120 -125 -130 -135 -140 -145 -150 -155 -160 -165  
f1 (ppm)

SI-32



3-70-5\_01  
Std proton

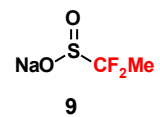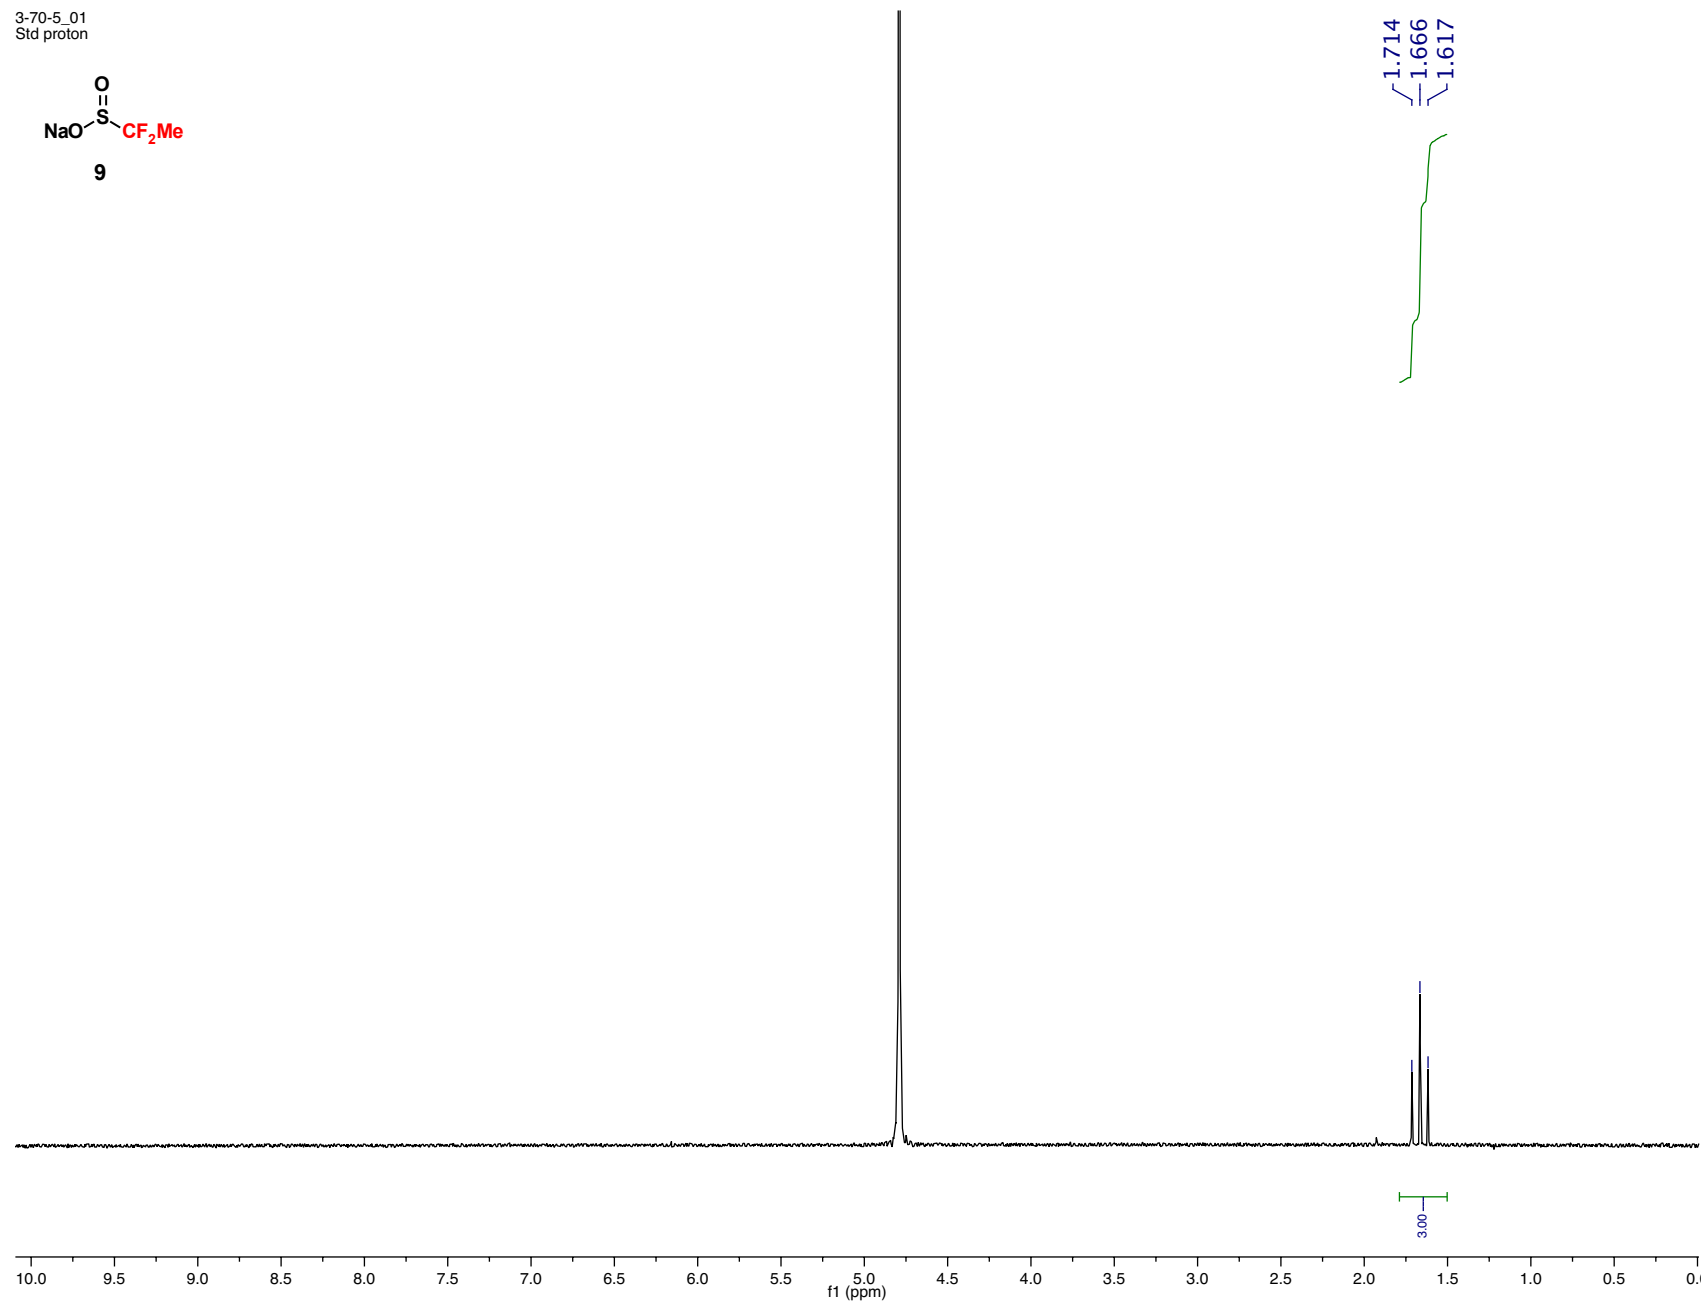

SI-33

3-DFES-13C/1  
C-13 Routine 1D, DCH CryoProbe, 10-26-2006

130.537  
128.686  
126.837

14.602  
14.451  
14.300

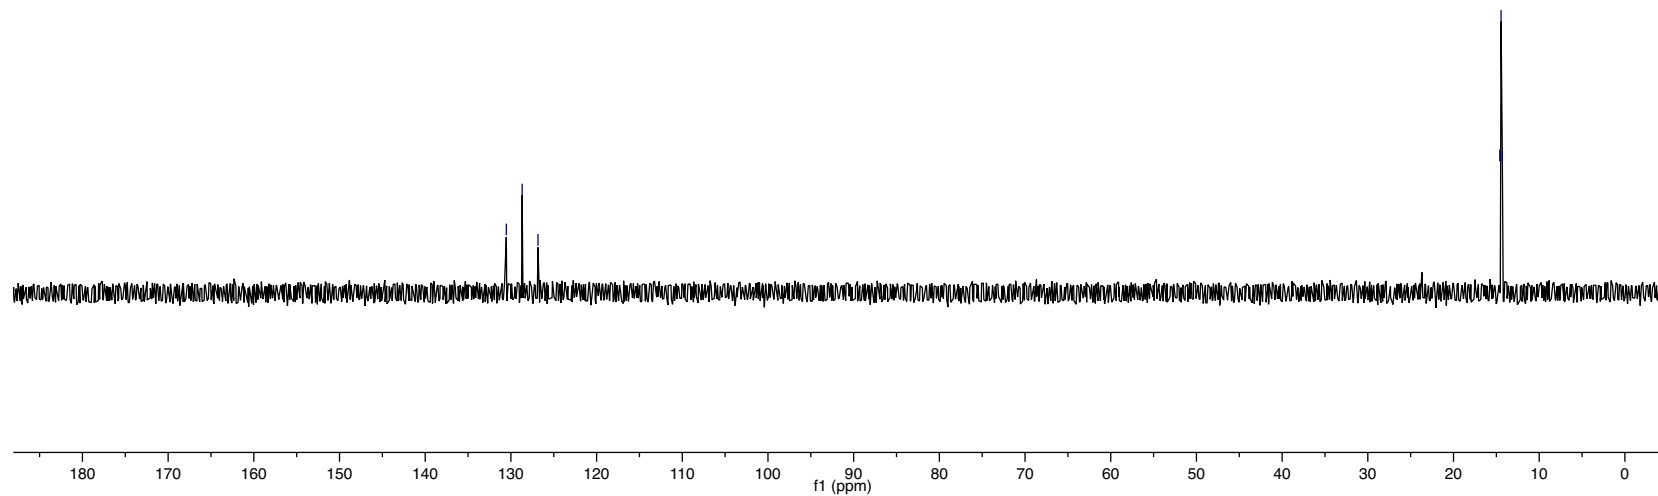

SI-34

3-70-crude-F/999  
F-19/D2O, Ref with CCl3F

--106.828

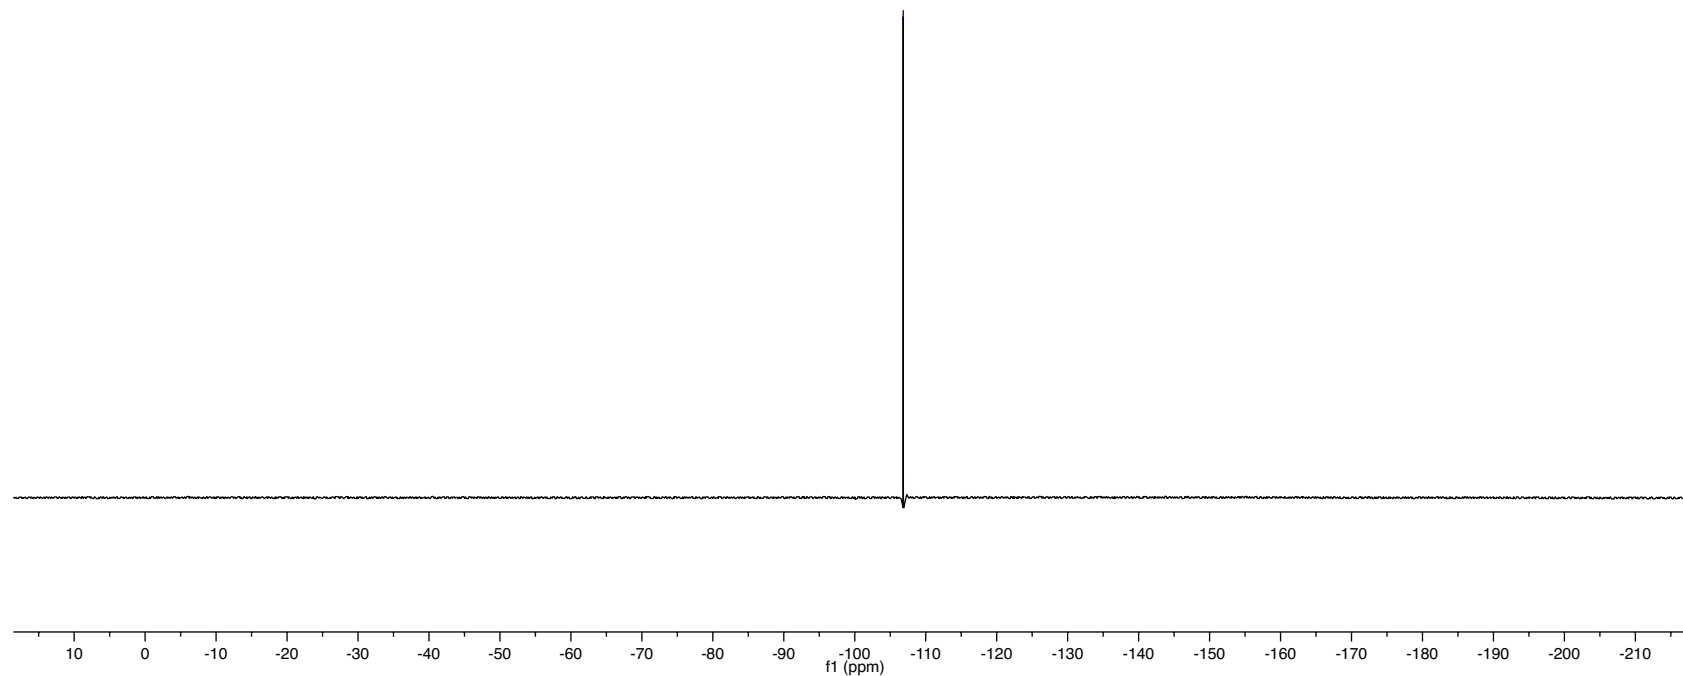

SI-35

3-71-caffeine-2/1  
H-1 Routine 1D experiment. BBO Probe, 9-13-2007

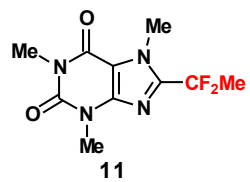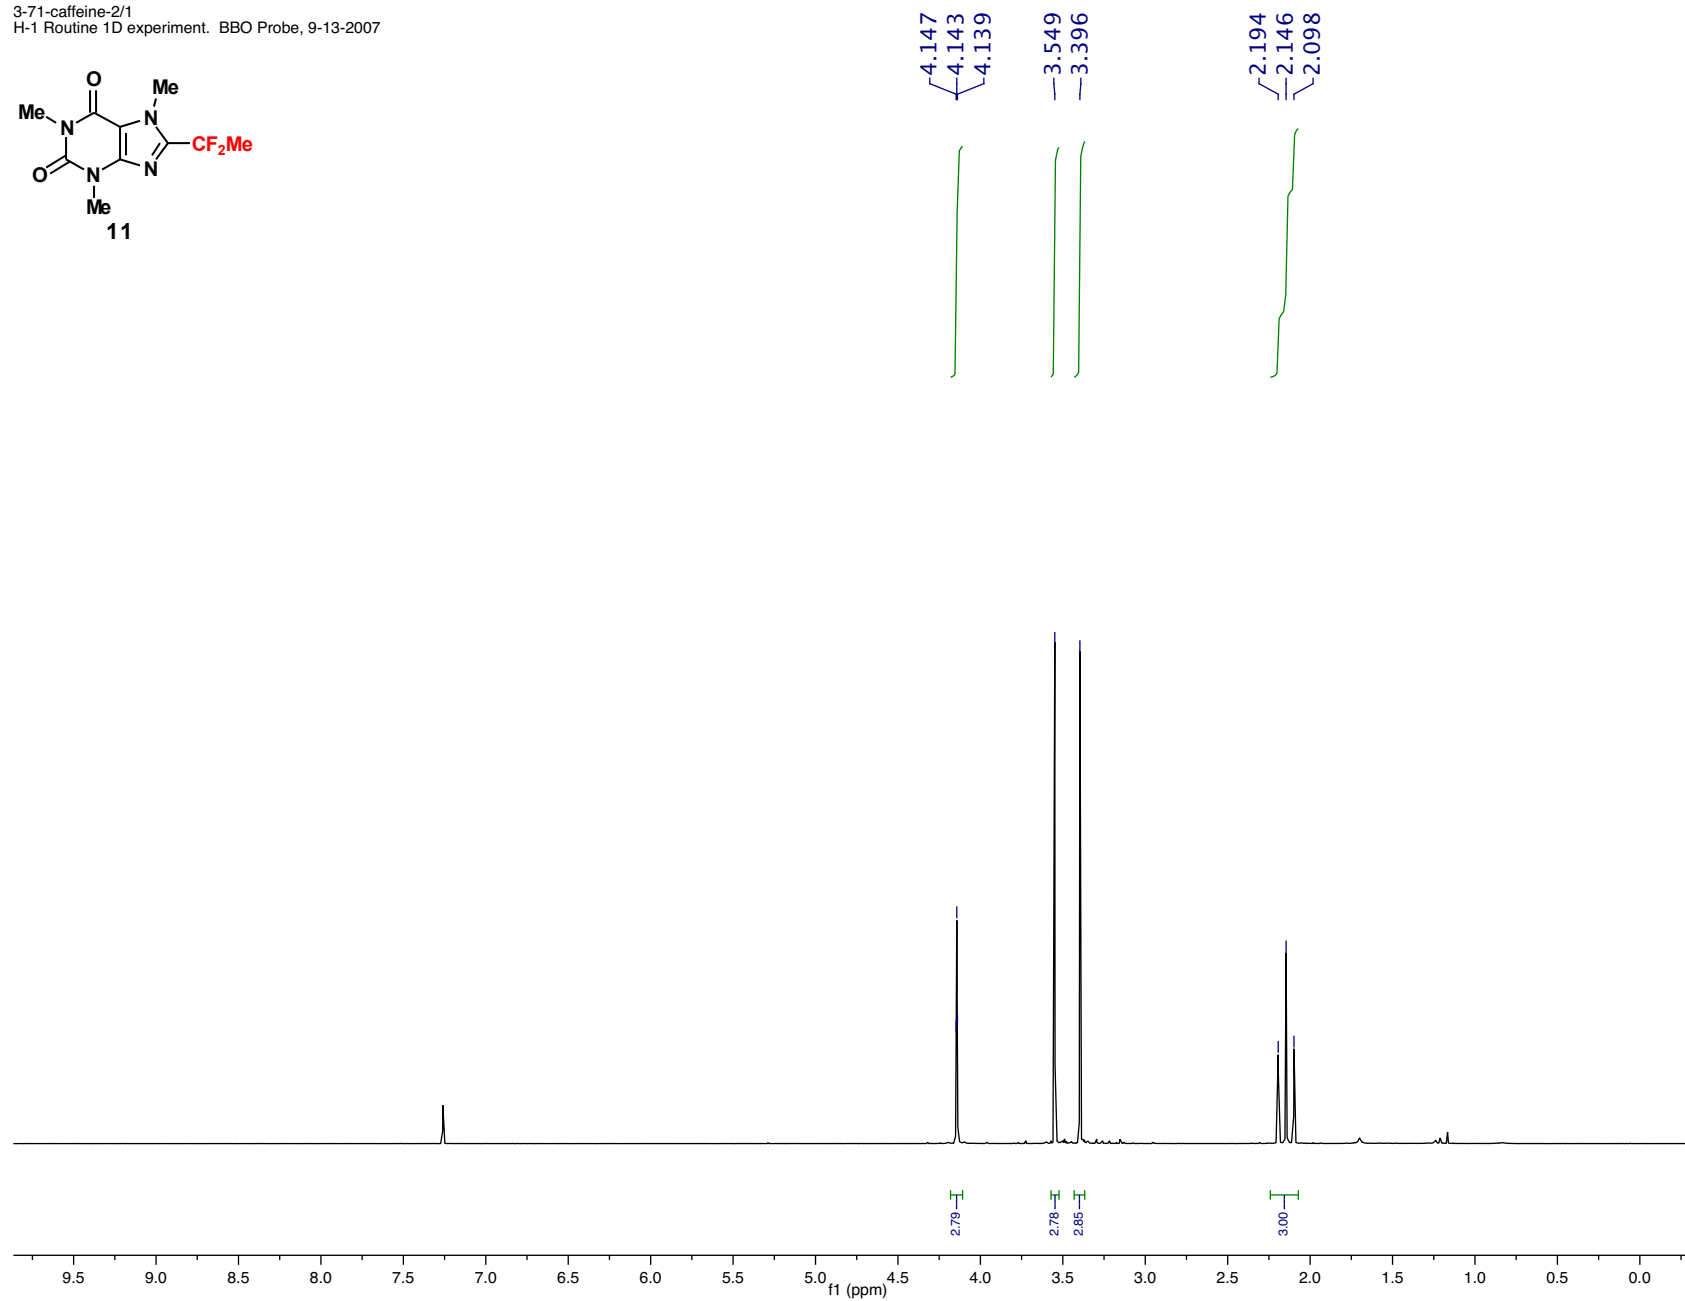

SI-36

3-71-caffeine-2-13C-final/1  
C-13 Routine 1D, DCH CryoProbe, 10-26-2006

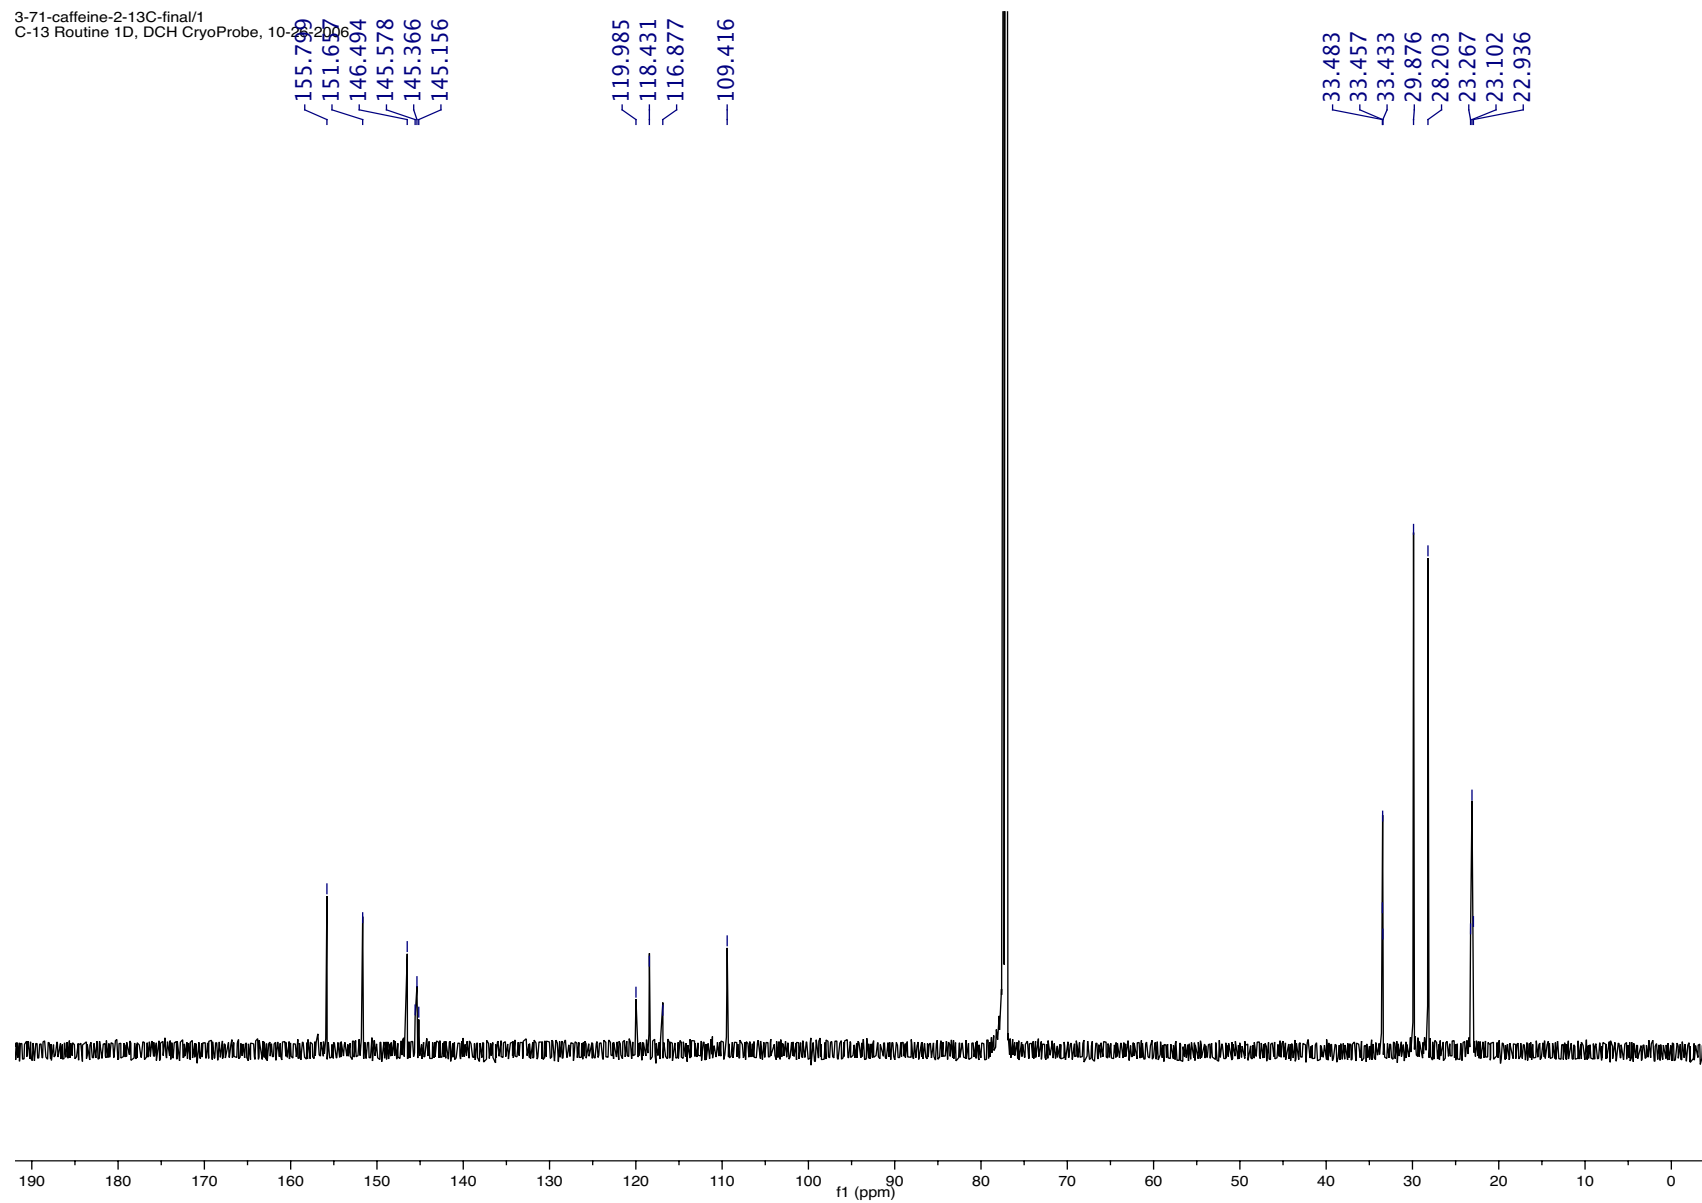

3-90-ZnCl2-F/1  
F-19, CDCl3, DPX-400 QNP Probe. CF3Cl as Ref at 0 ppm.

--87.470

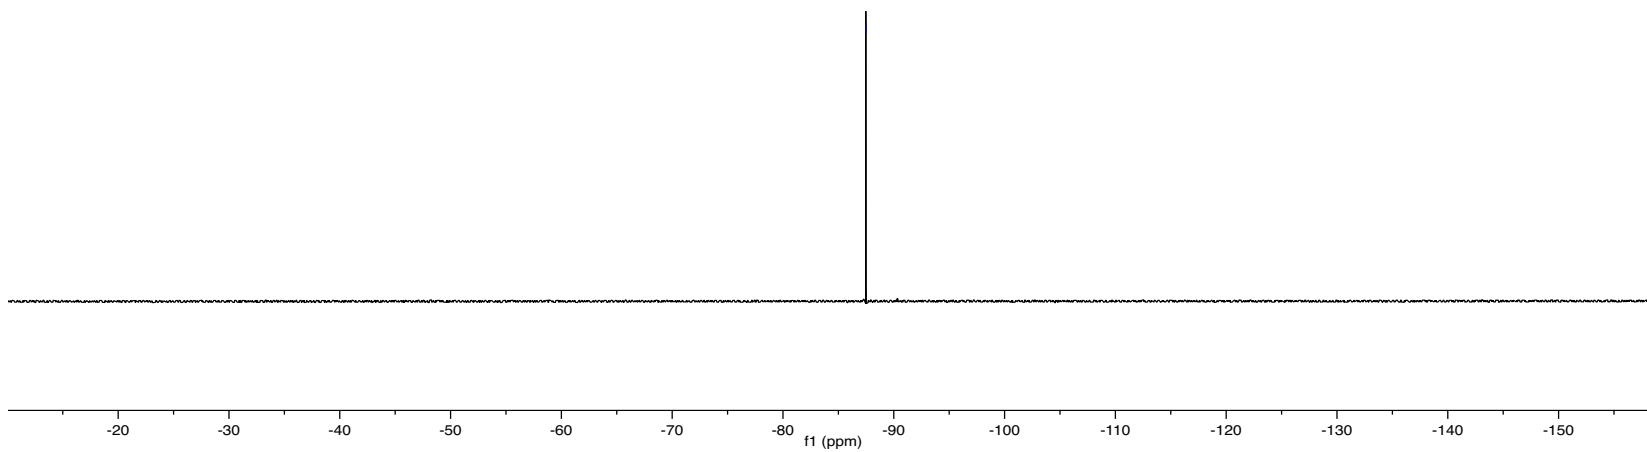

3-71-py-1-second-check-H/1

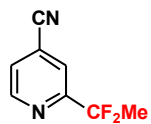

12-C2

8.844  
8.841  
8.839  
8.837  
8.831  
8.829  
8.827  
7.887  
7.884  
7.881  
7.620  
7.619  
7.616  
7.615  
7.613  
7.608  
7.606  
7.604  
7.602

2.076  
2.029  
1.982

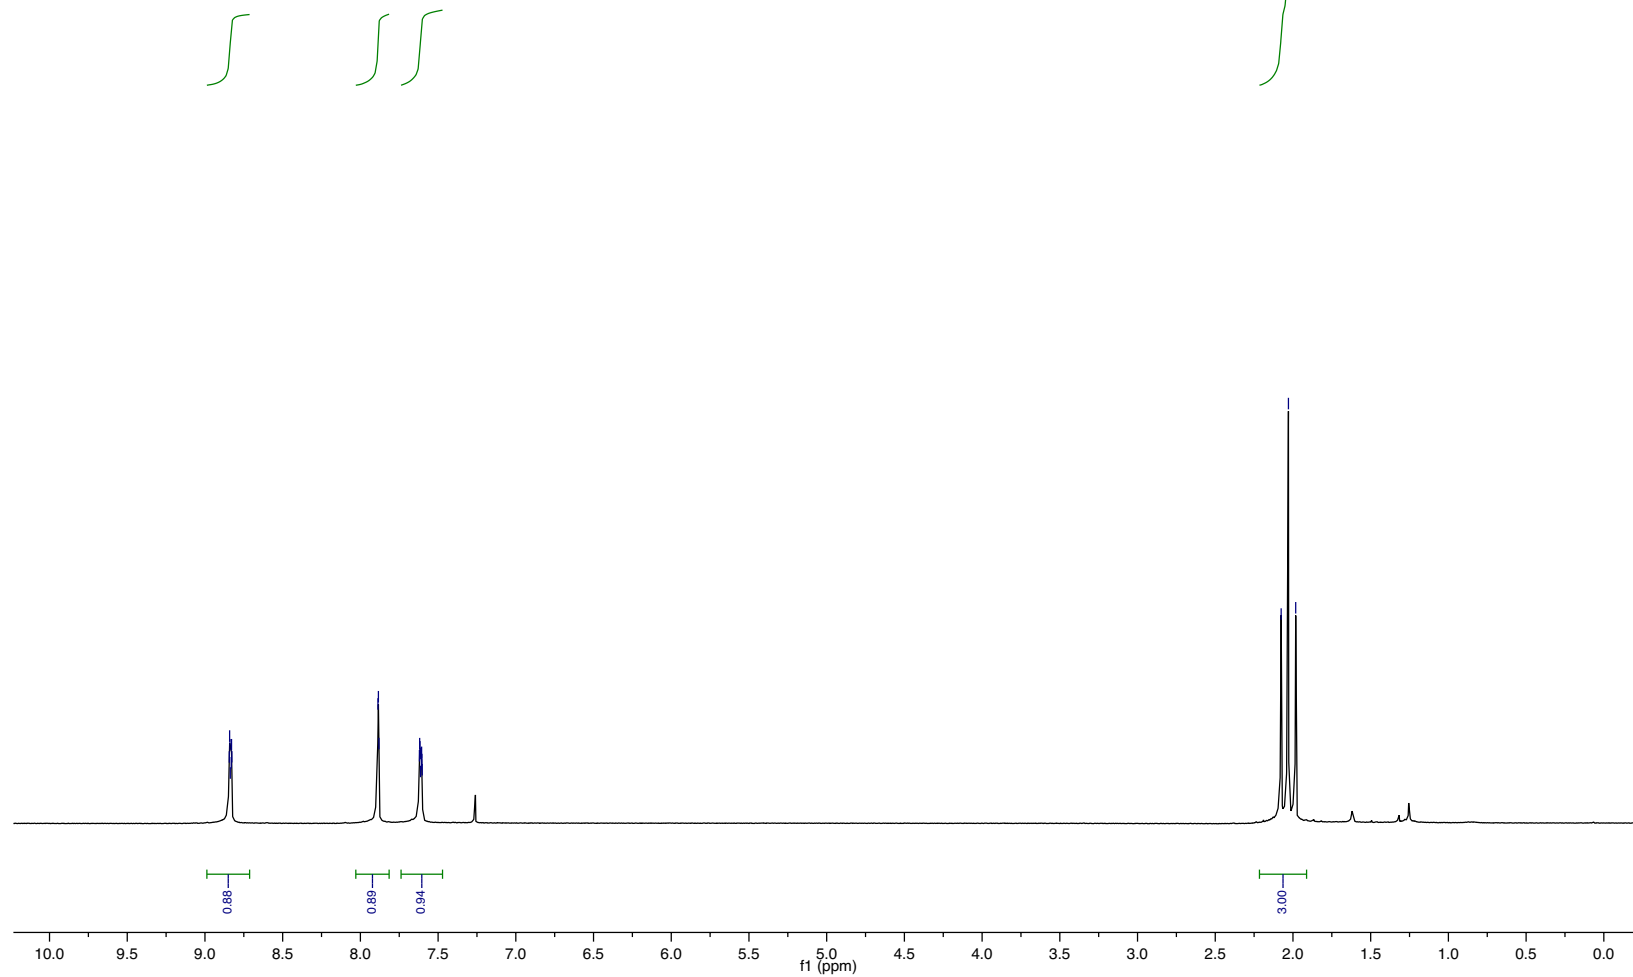

3-71-py-second-13C-re/1  
C-13 Routine 1D, DCH CryoProbe, 200 MHz, 296

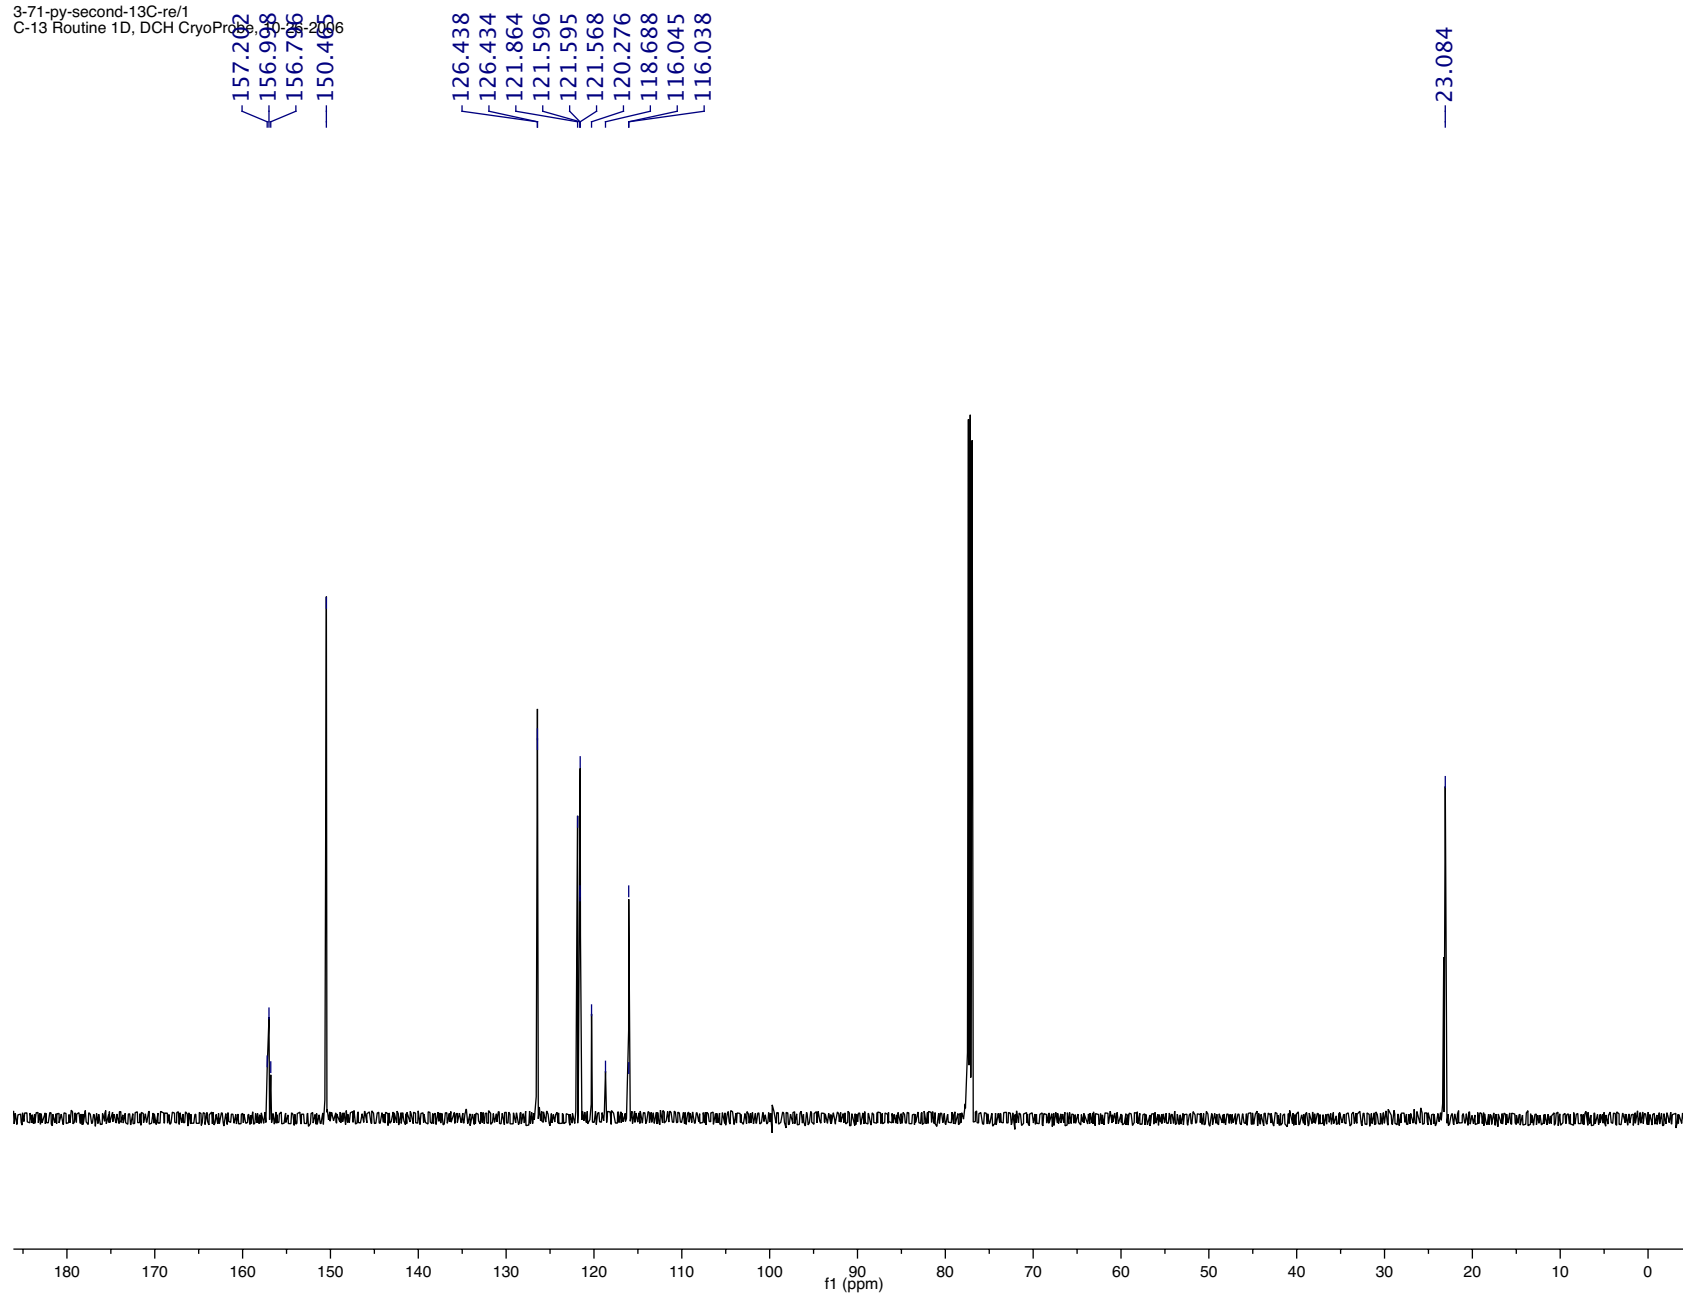

SI-40



3-71-Py-1-F-ref1  
F-19, CDCl3, DPX-400 QNP Probe. CF3Cl as Ref at 0 ppm.

--91.399

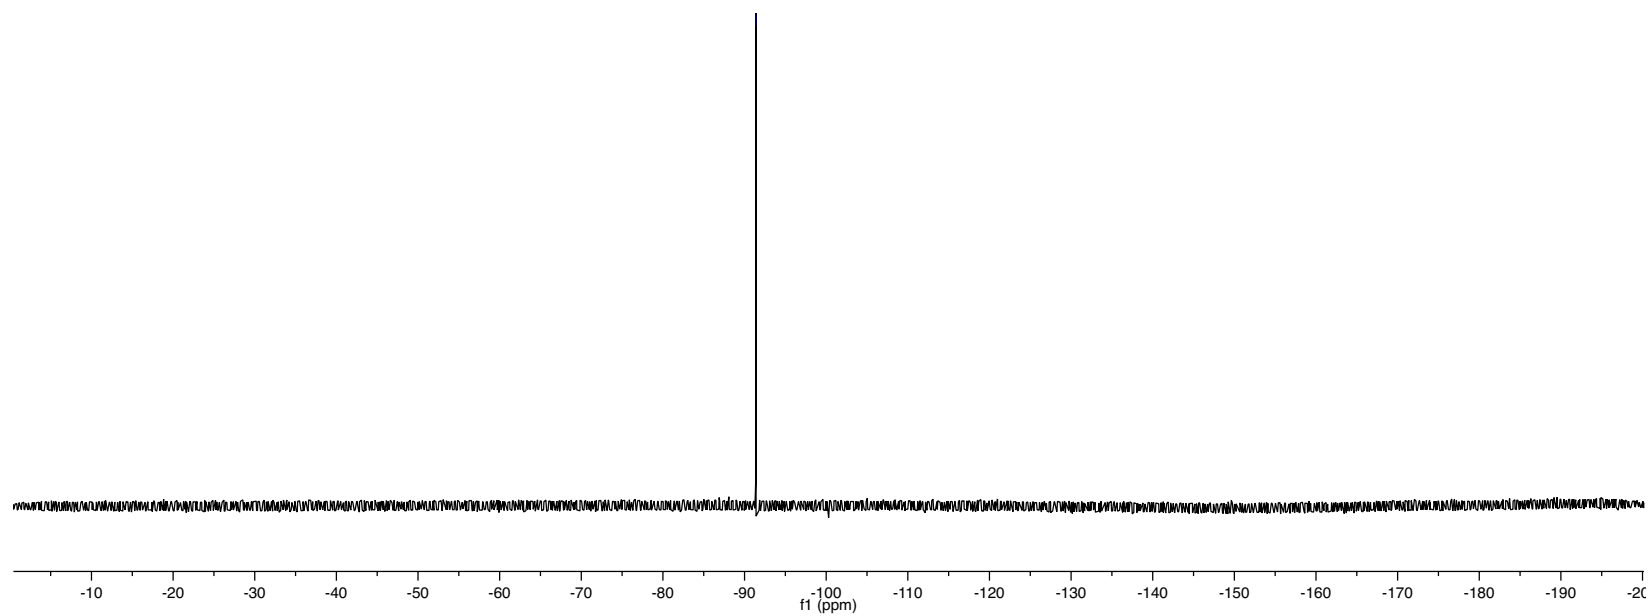

SI-41

3-71-py-2-second-check-H/1

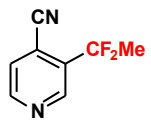

12-C3

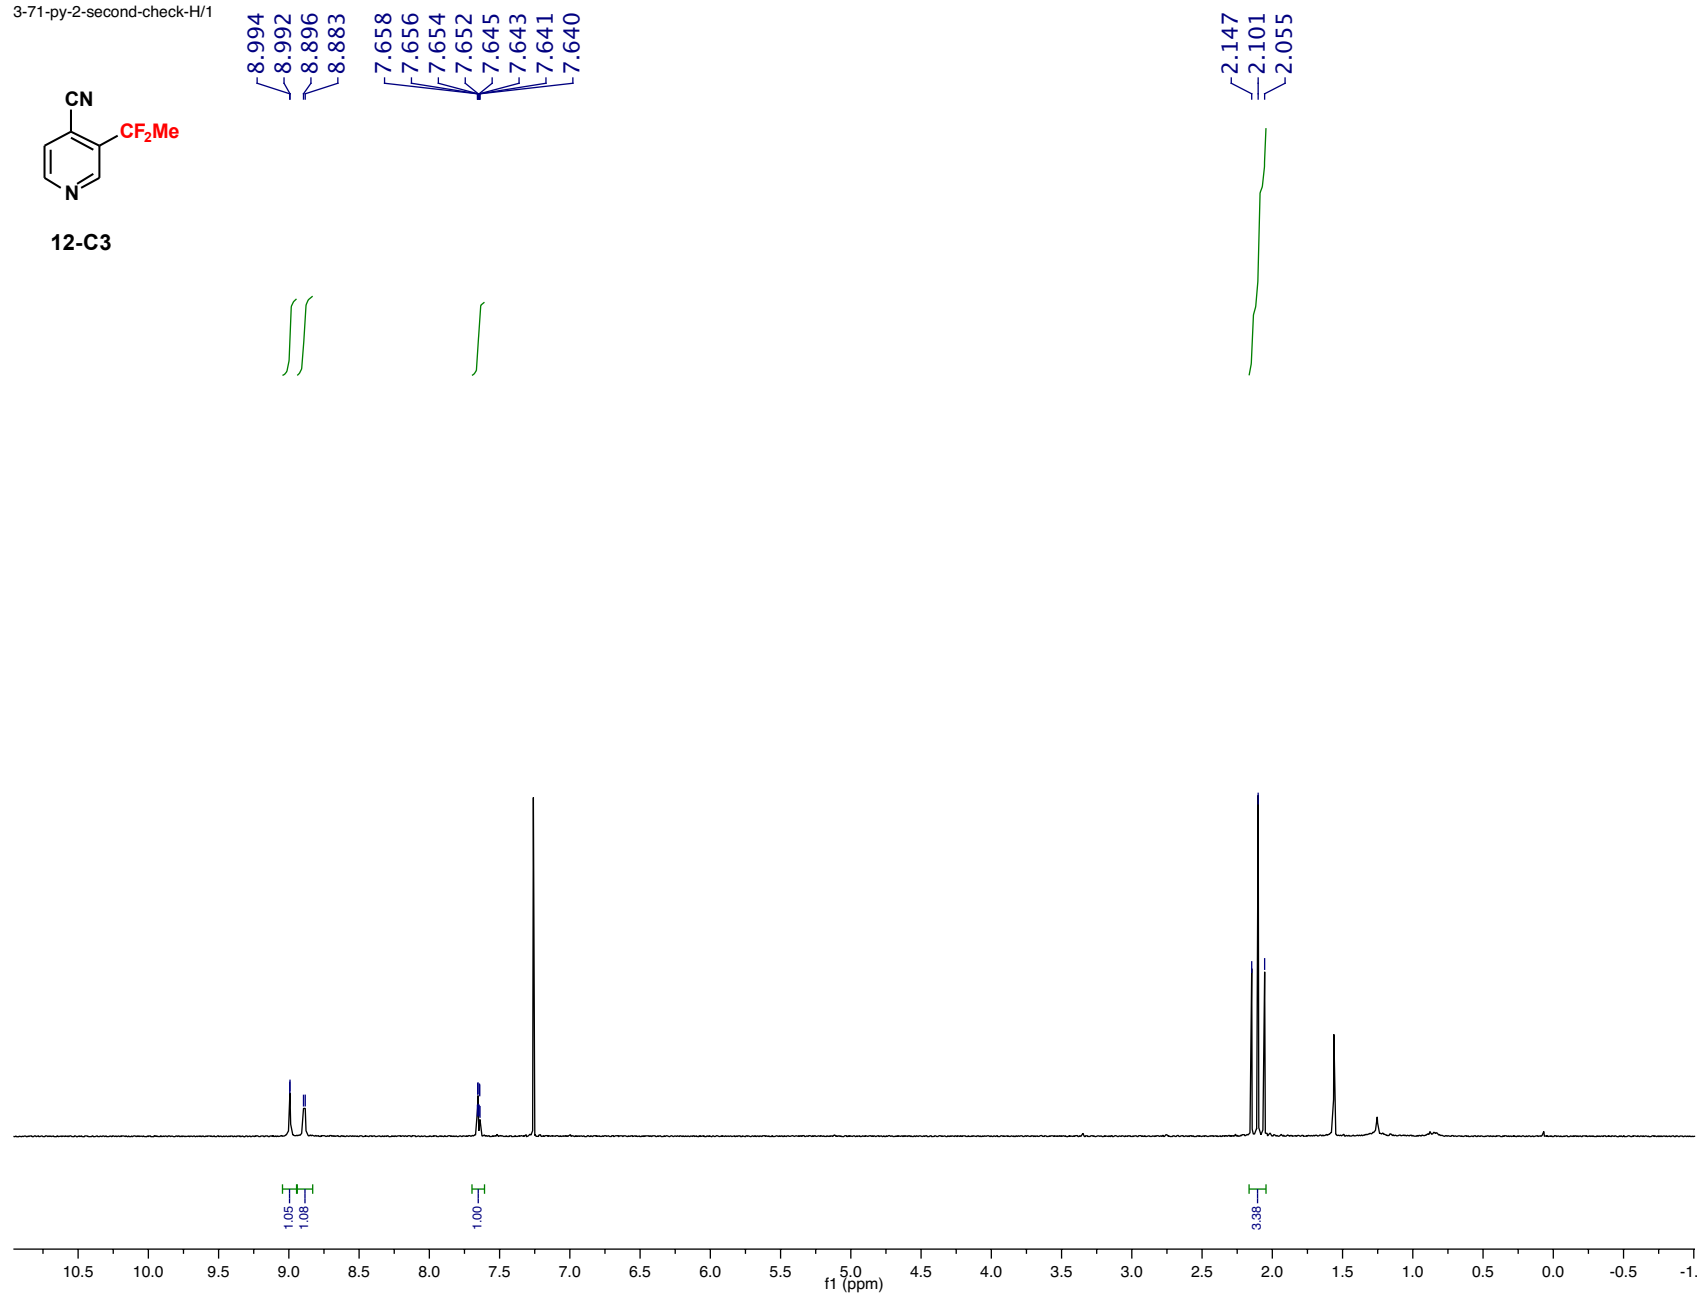

3-71-py-2-second-13C-re/1  
C-13 Routine 1D, DCH CryoProbe, 10-26-2005

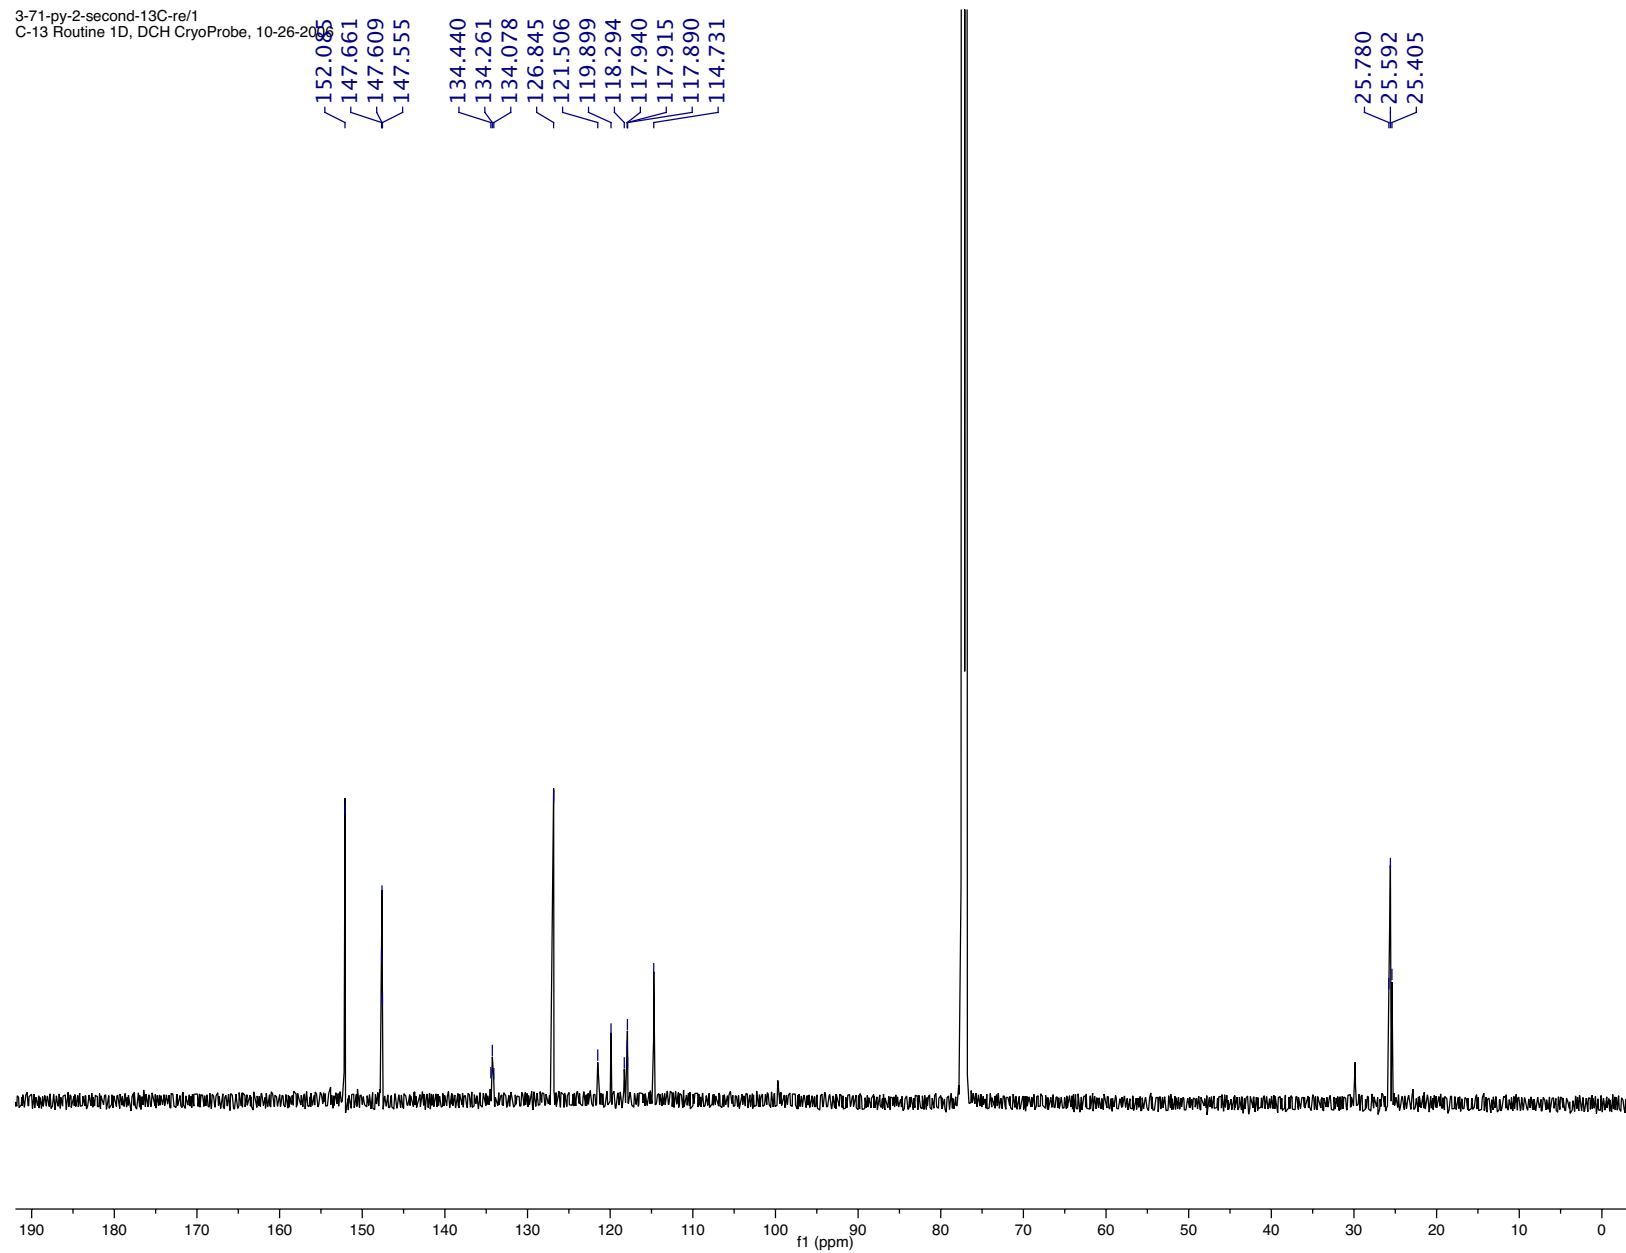

SI-43

3-71-py-2-F1  
F-19, CDCl<sub>3</sub>, DPX-400 QNP Probe. CF<sub>3</sub>Cl as Ref at 0 ppm.

---87.924

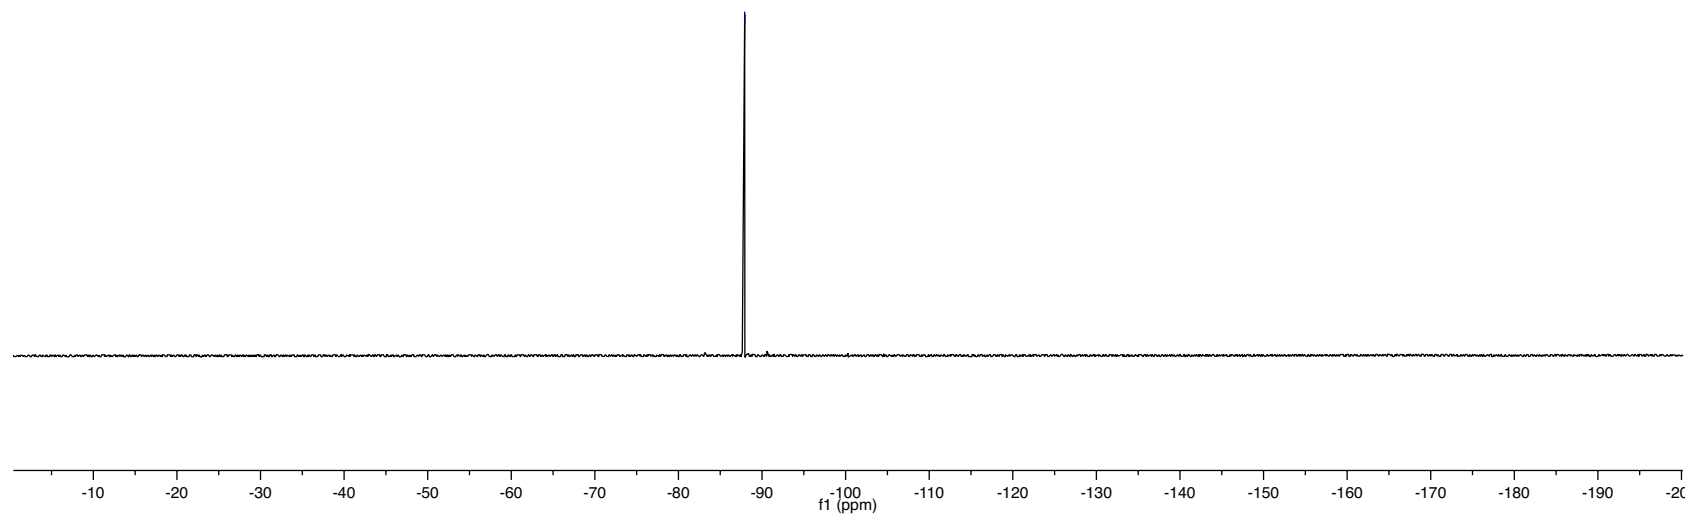

SI-44

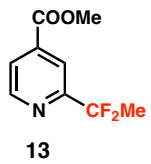

Aler\_174\_clean0  
 StdProc001  
 8.71  
 8.70  
 8.68  
 8.77  
 8.79  
 8.20  
 8.20  
 8.20  
 8.19  
 7.93  
 7.93  
 7.92

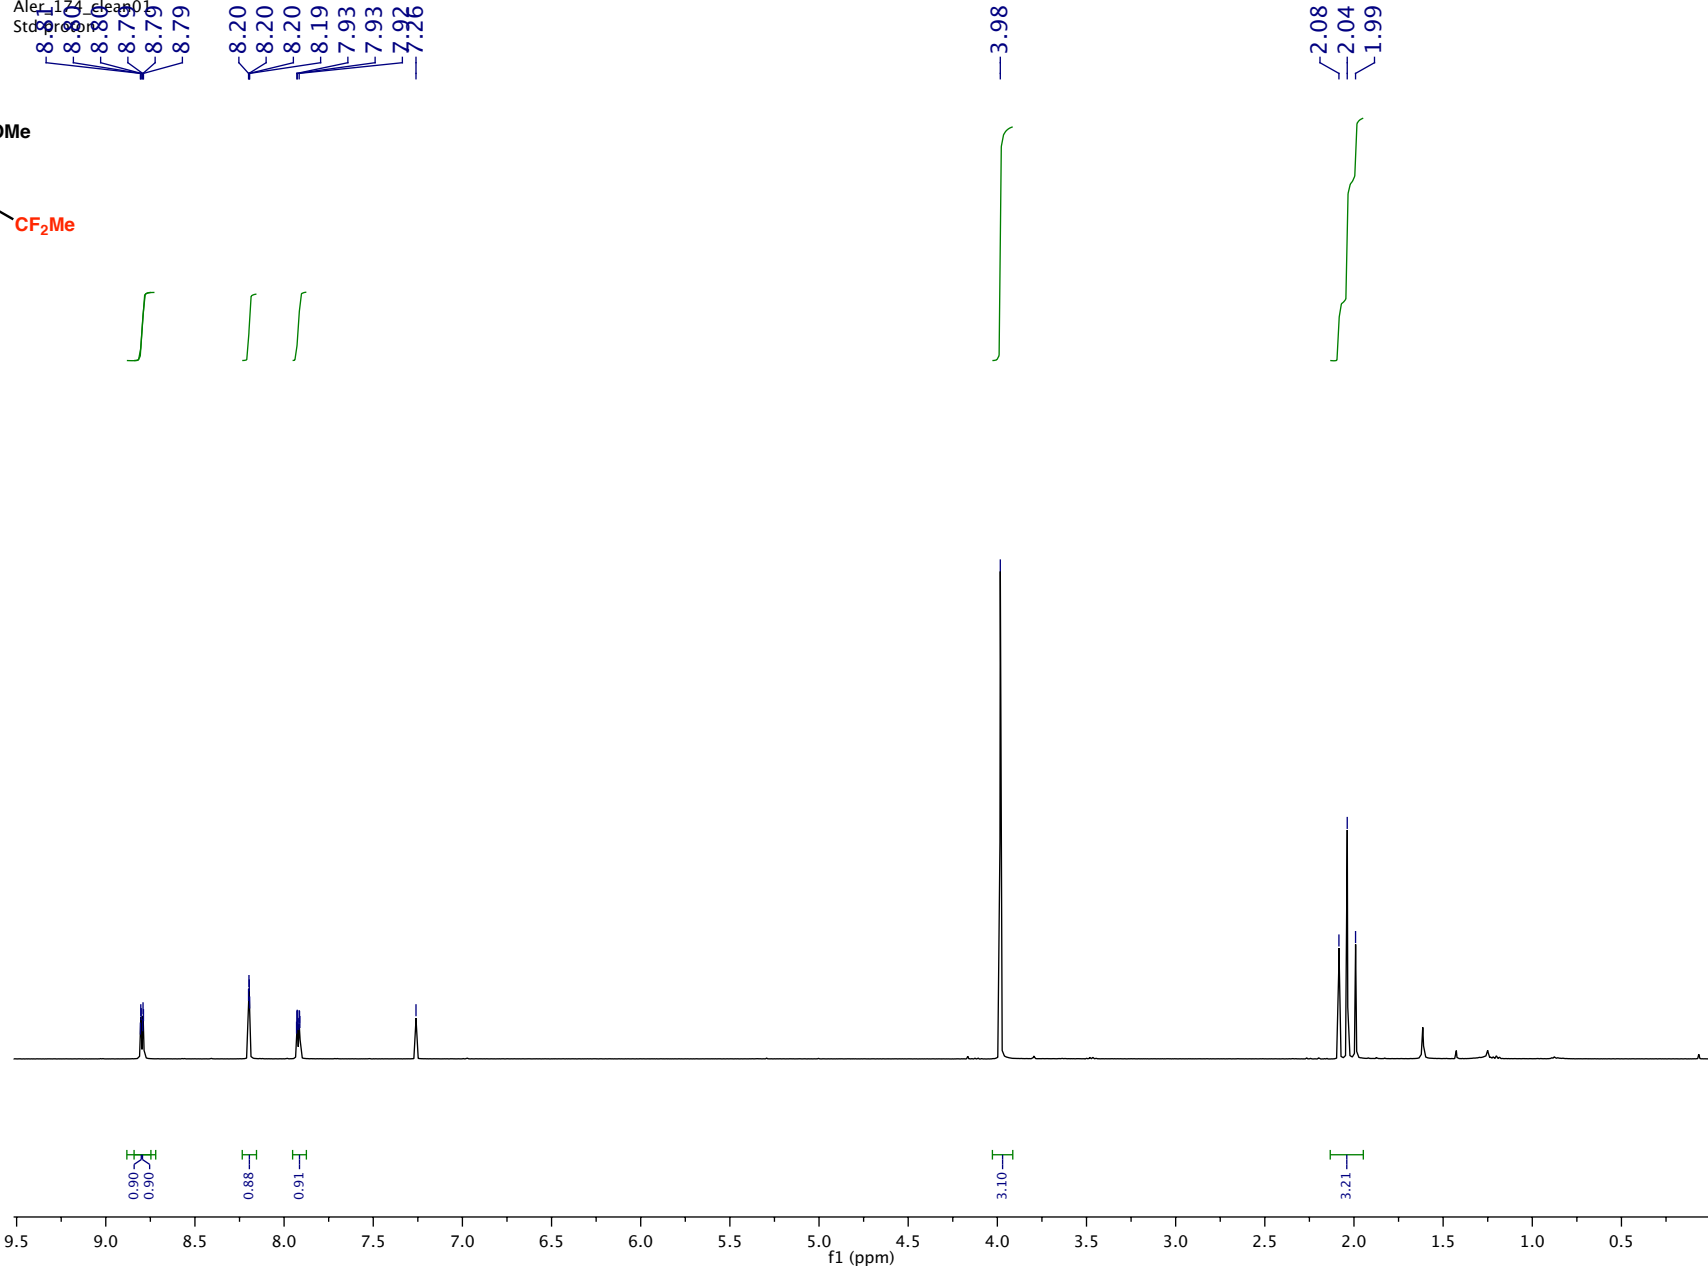

aler-174-13C.1.fid  
C-13 Routine 1D, DCH CryoProbe, 10-26-2006

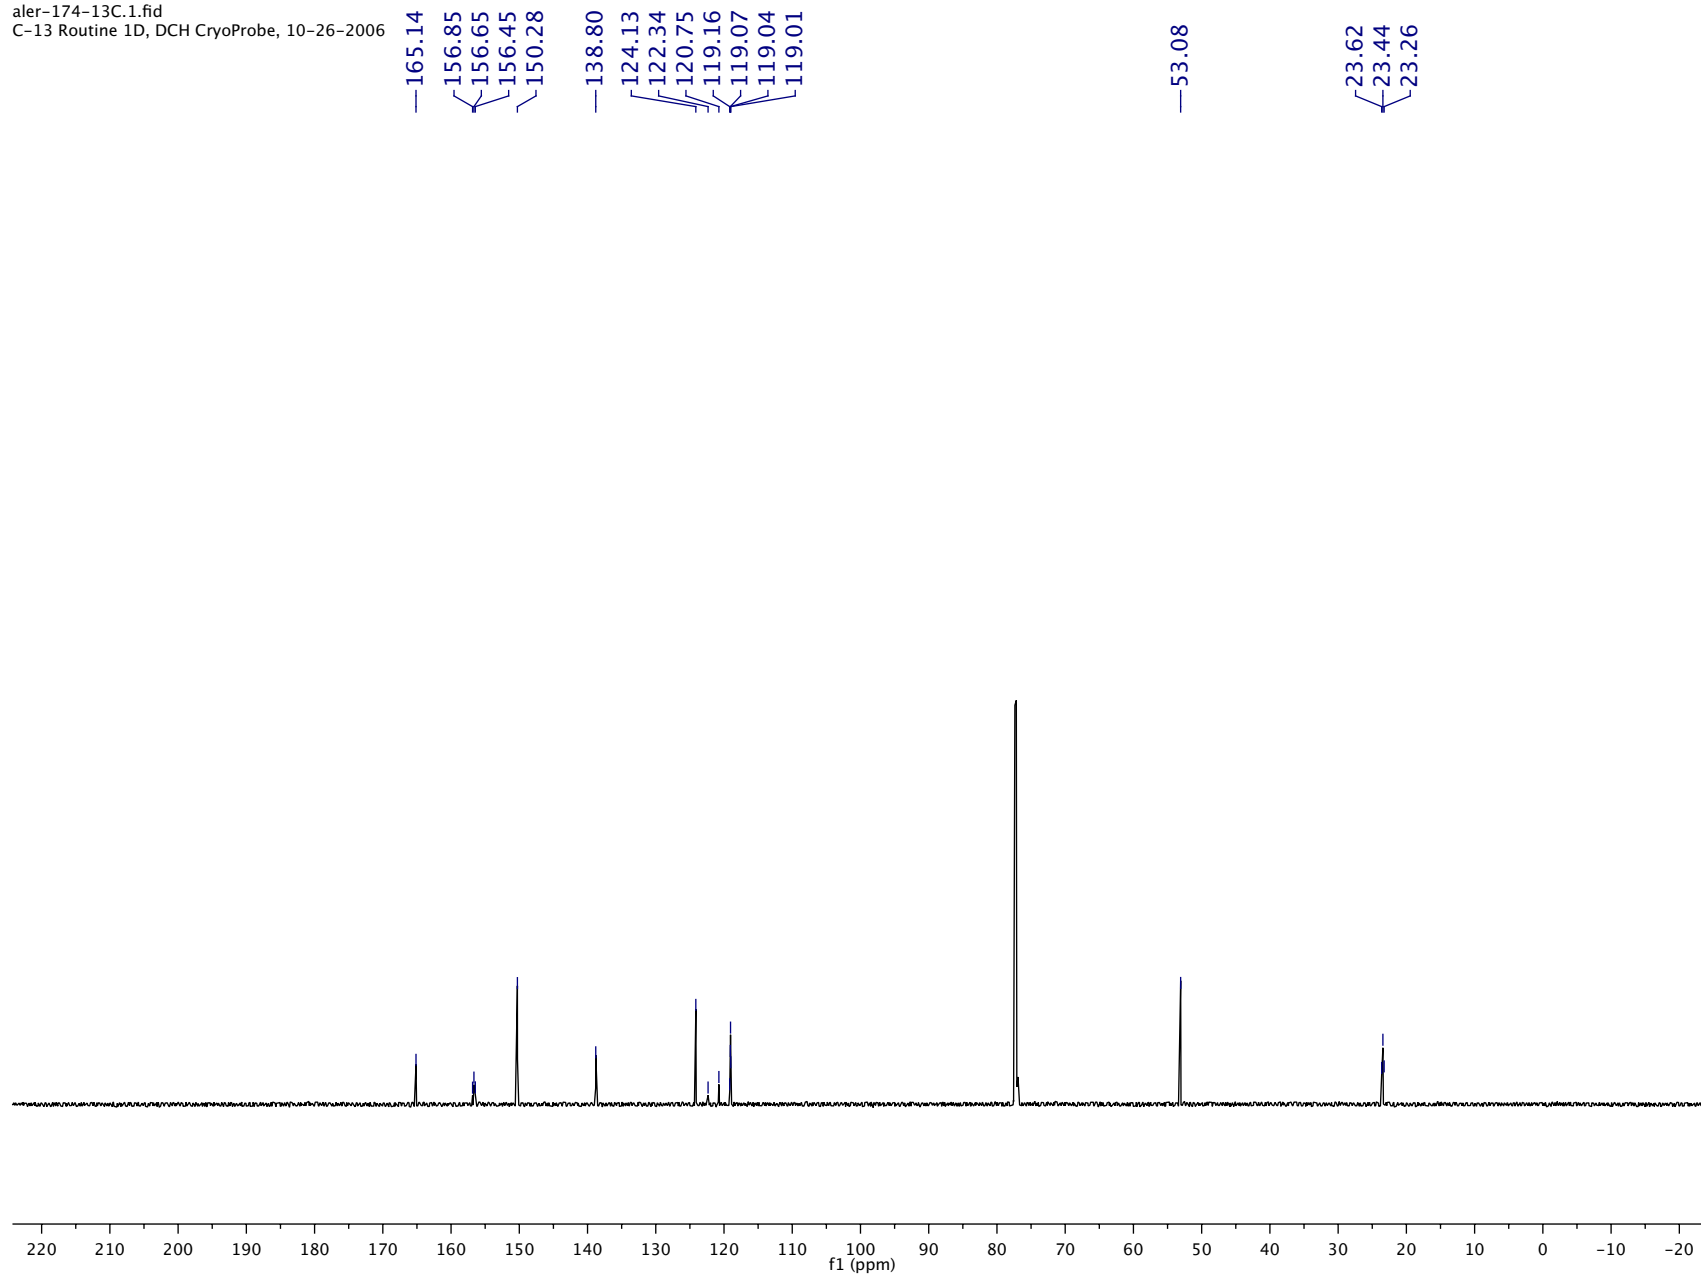

SI-46

A1eF\_1/4\_F-1.n0  
F-19, CDCl3, DPX-400 QNP Probe. CF3Cl as Ref at 0 ppm.

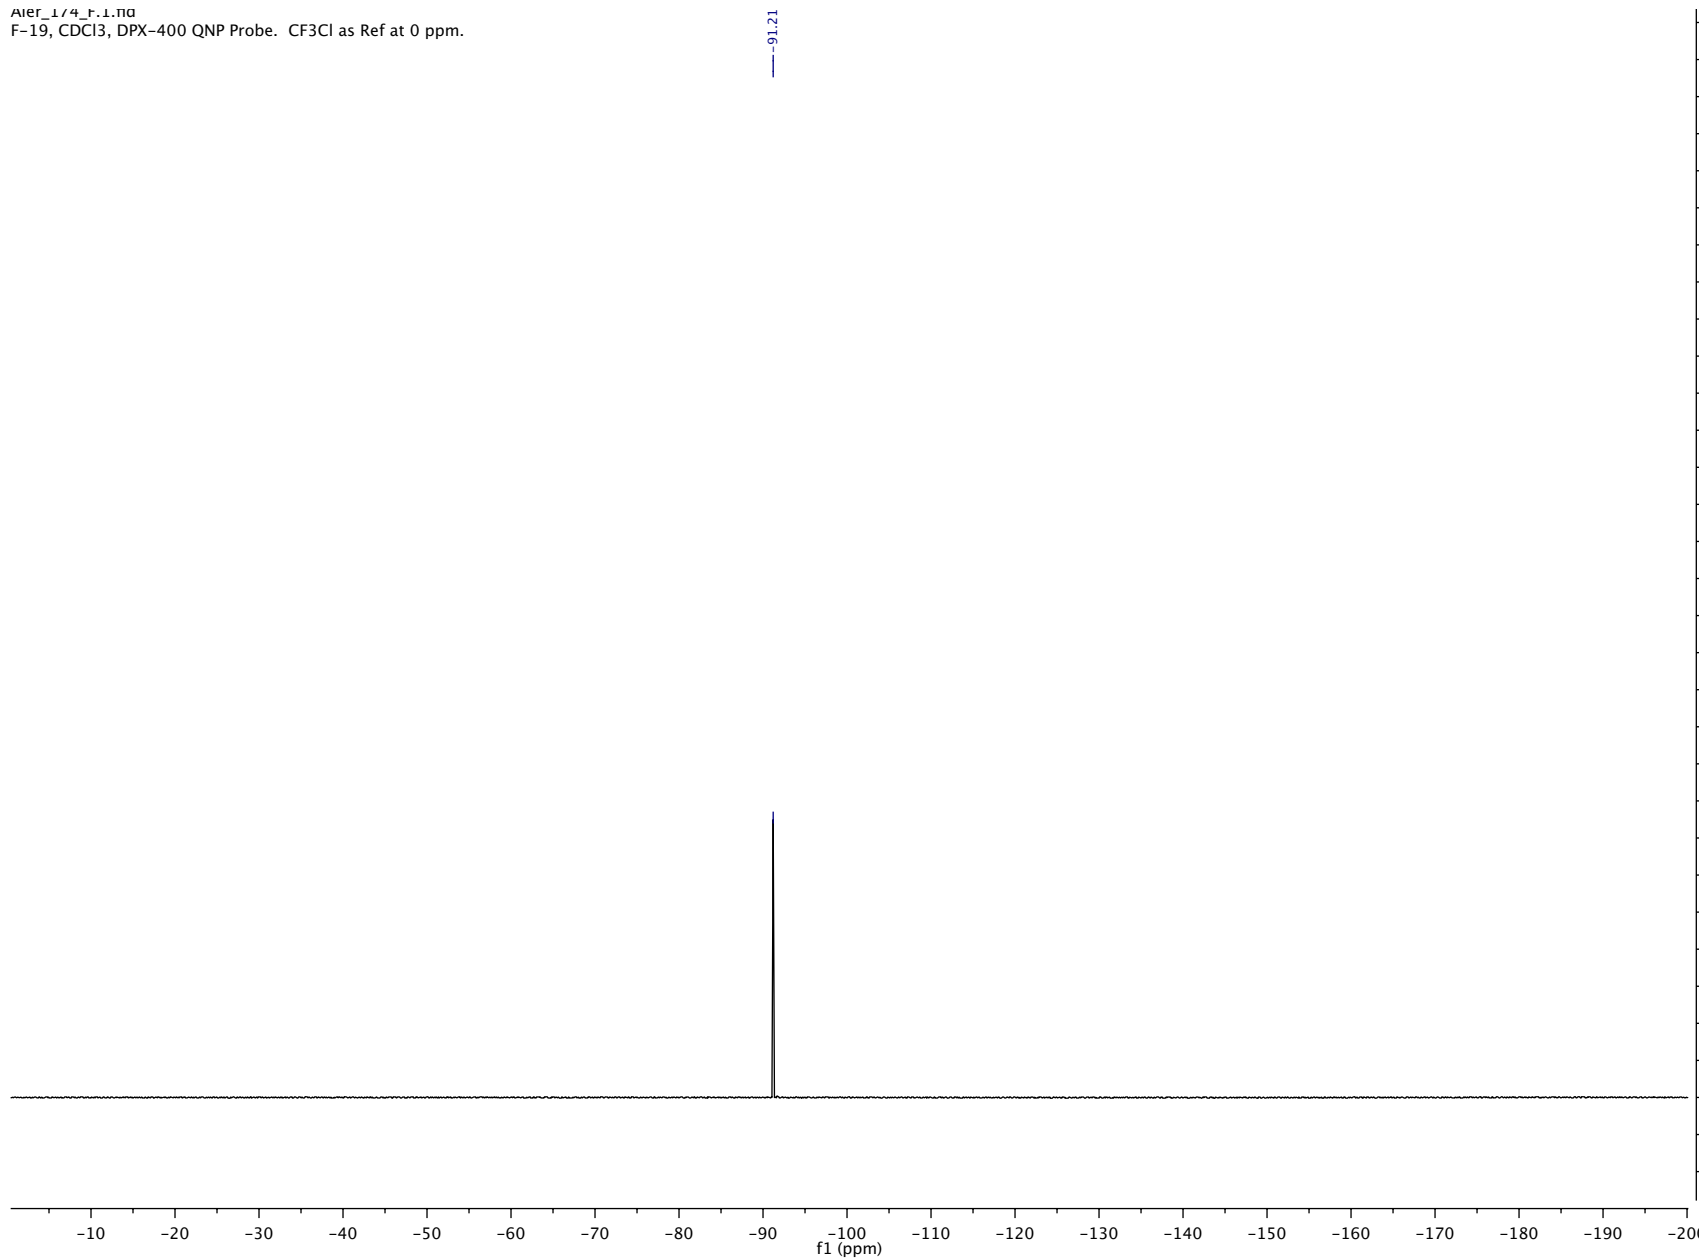

SI-47

Aler\_227\_2D\_01  
Std proton

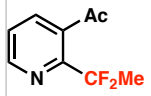

14-C2

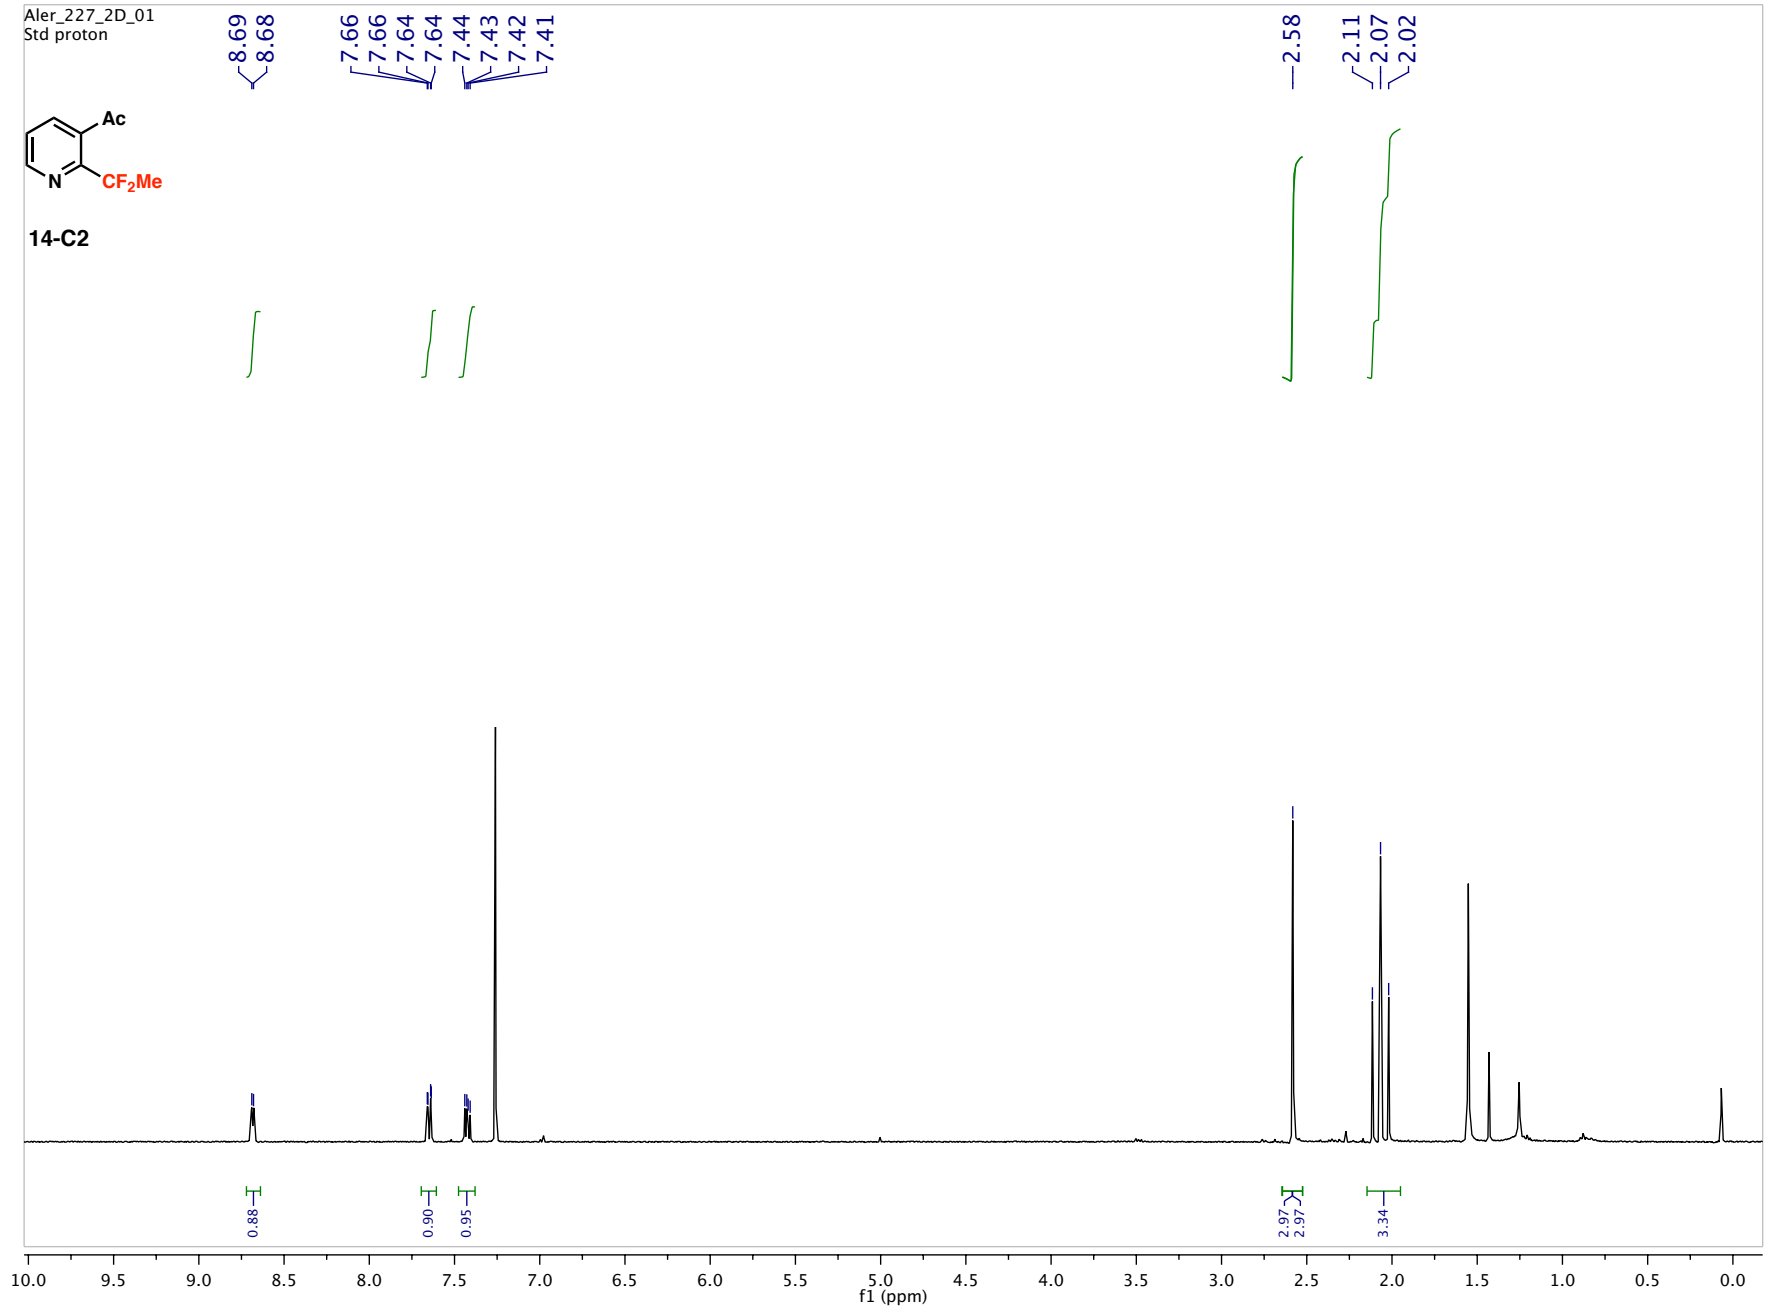



aler-227-2D-13C\_1.fid  
C-13 Routine ID, 13C CH CryoProbe, 10-26-2006

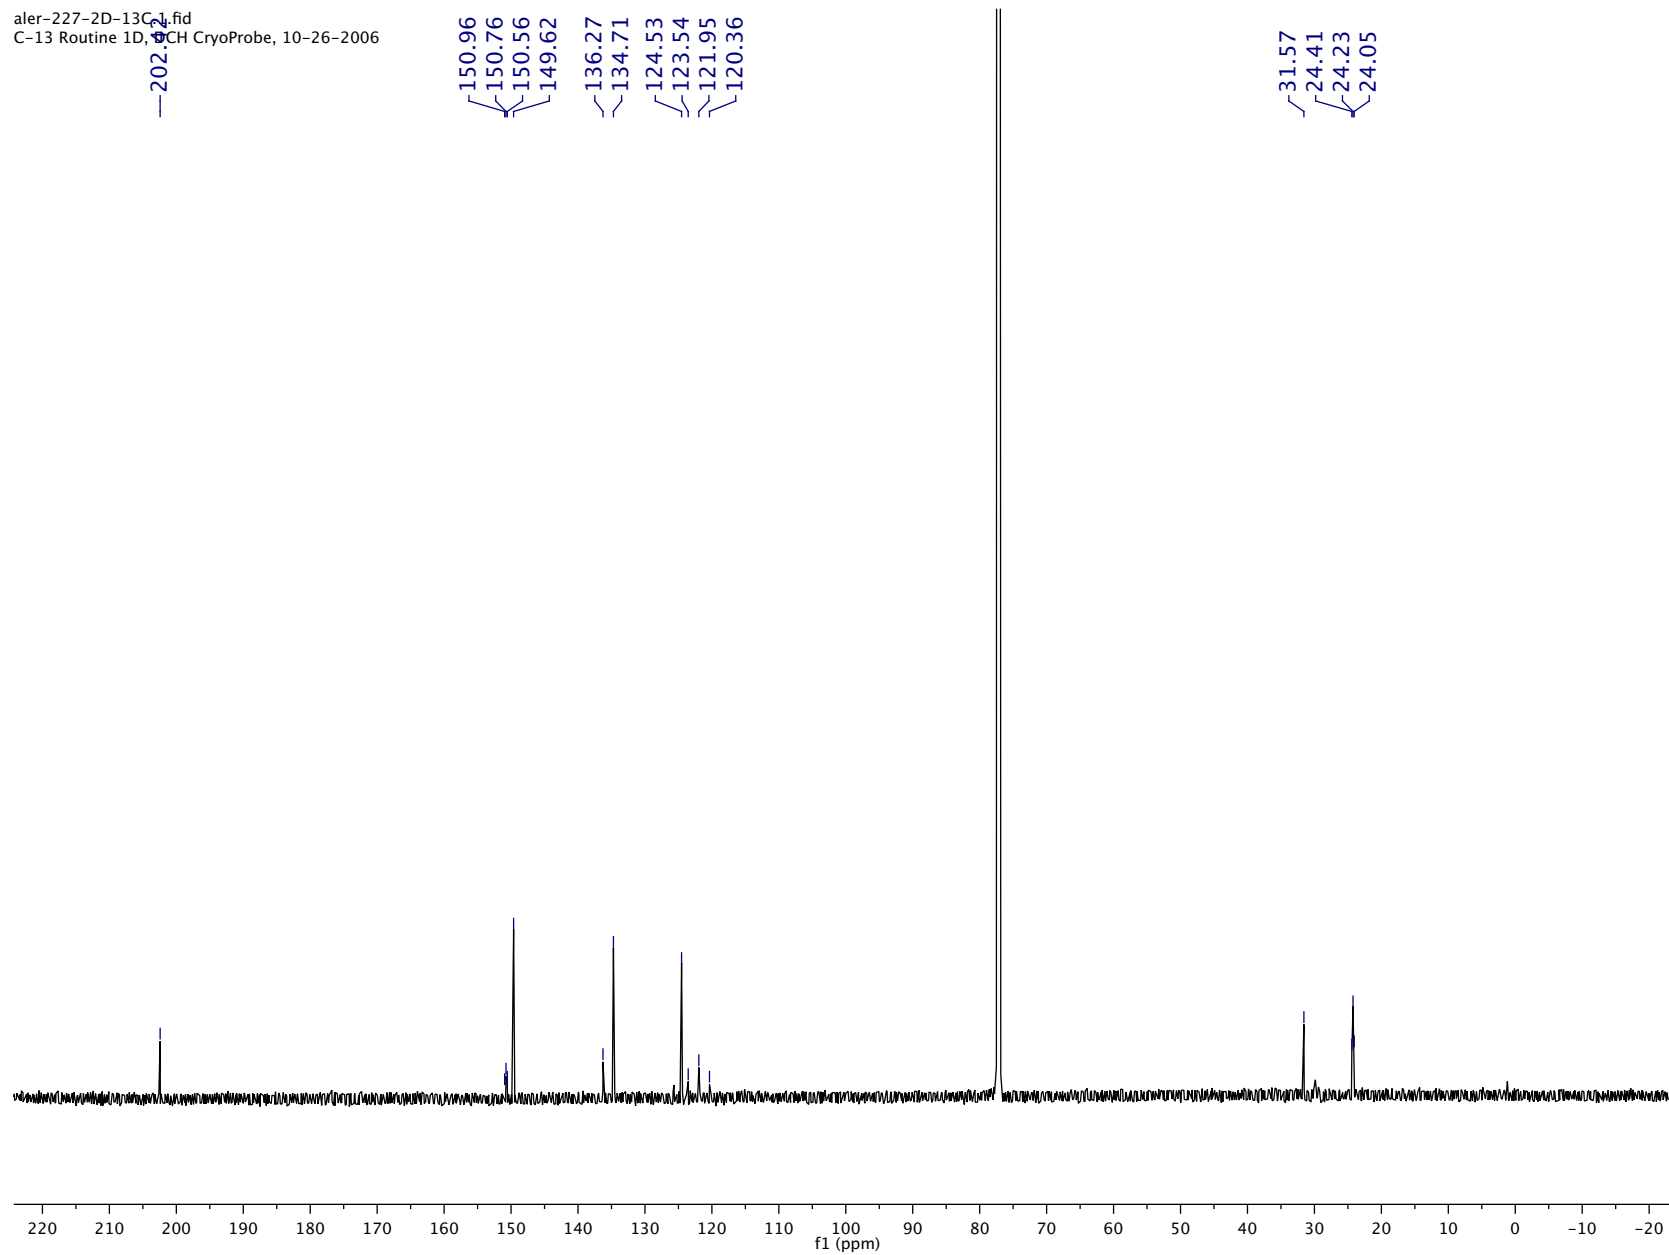

Aler\_227\_1D\_F.1.fid  
F-19, CDCI3, DPX-400 QNP Probe. CF3Cl as Ref at 0 ppm.

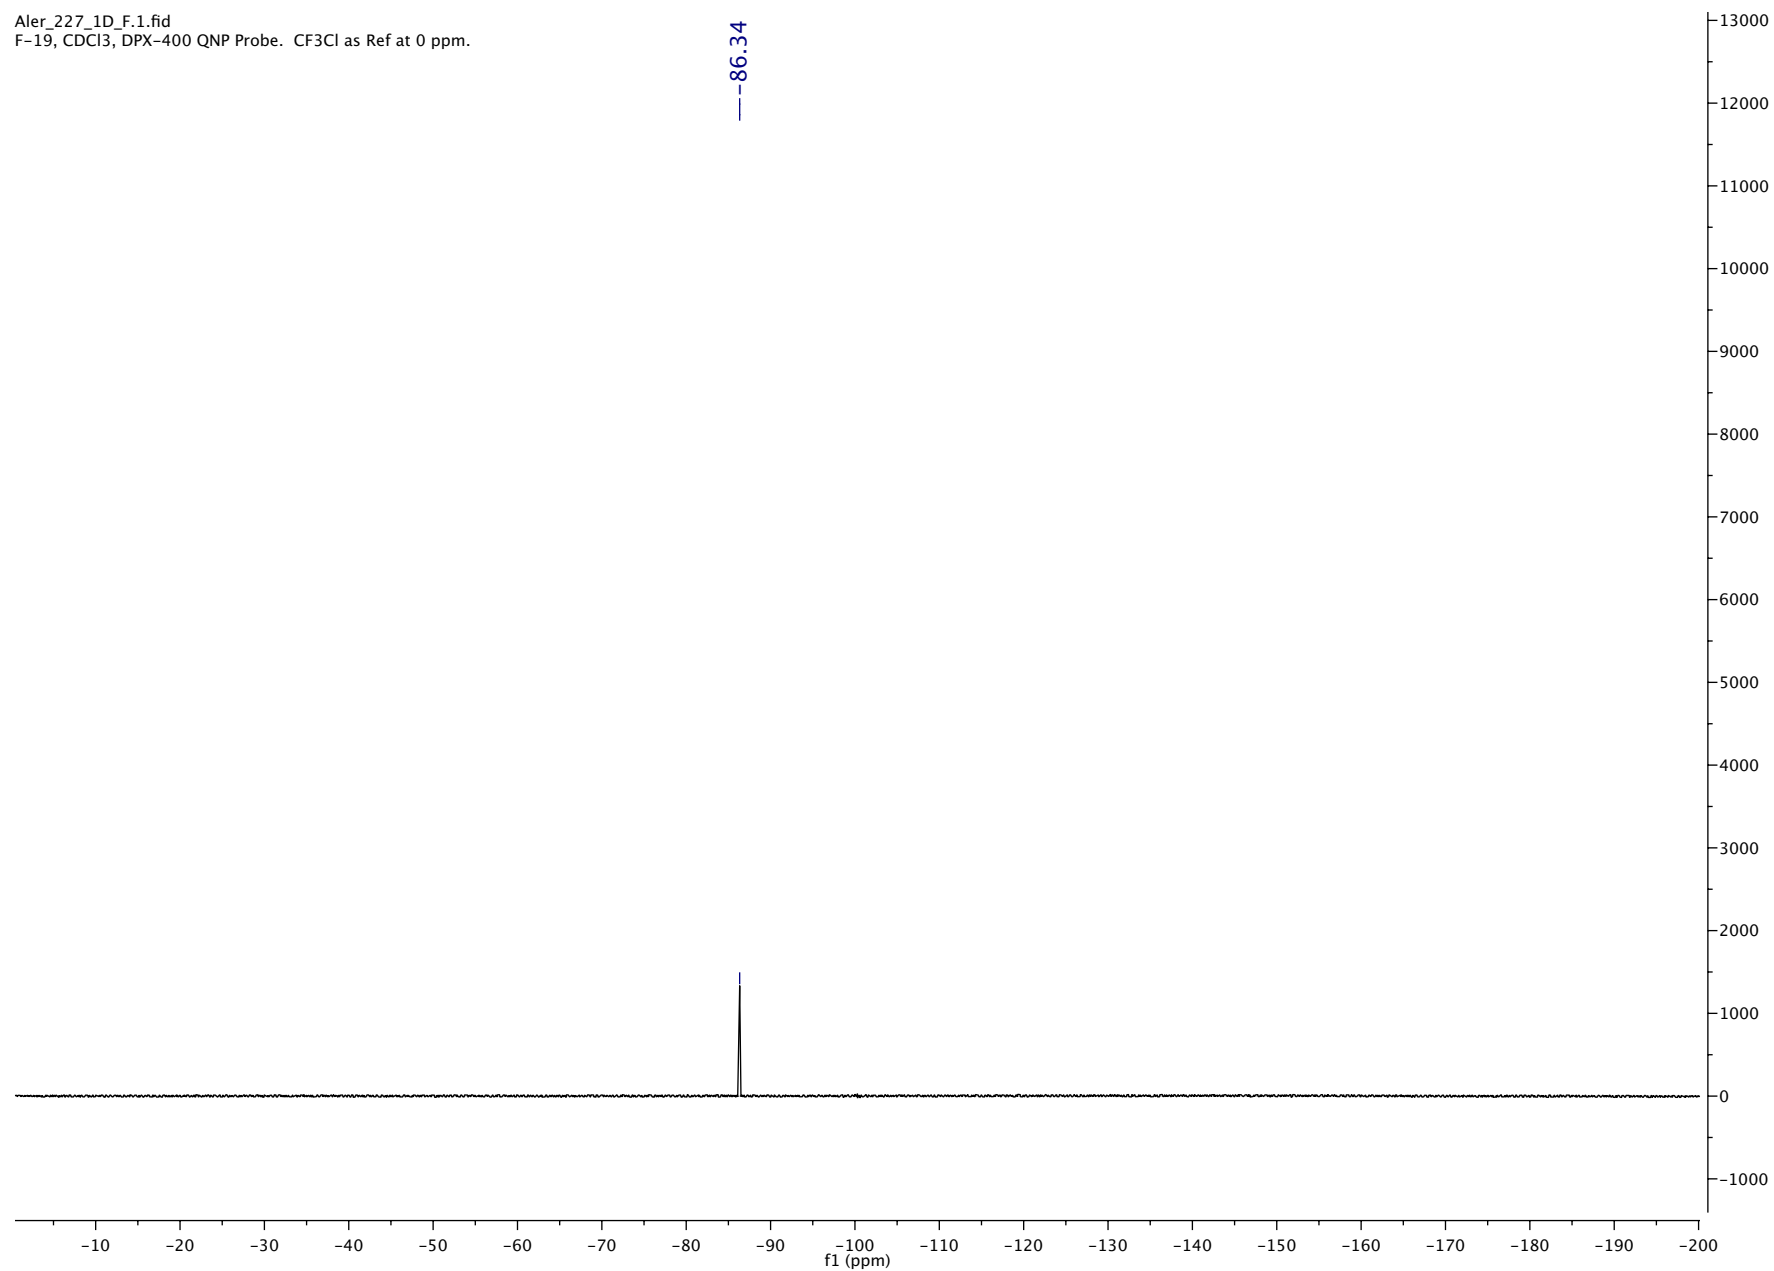

SI-50

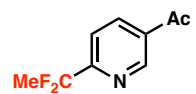

14-C6

Aler\_227\_1A\_01  
Std proton

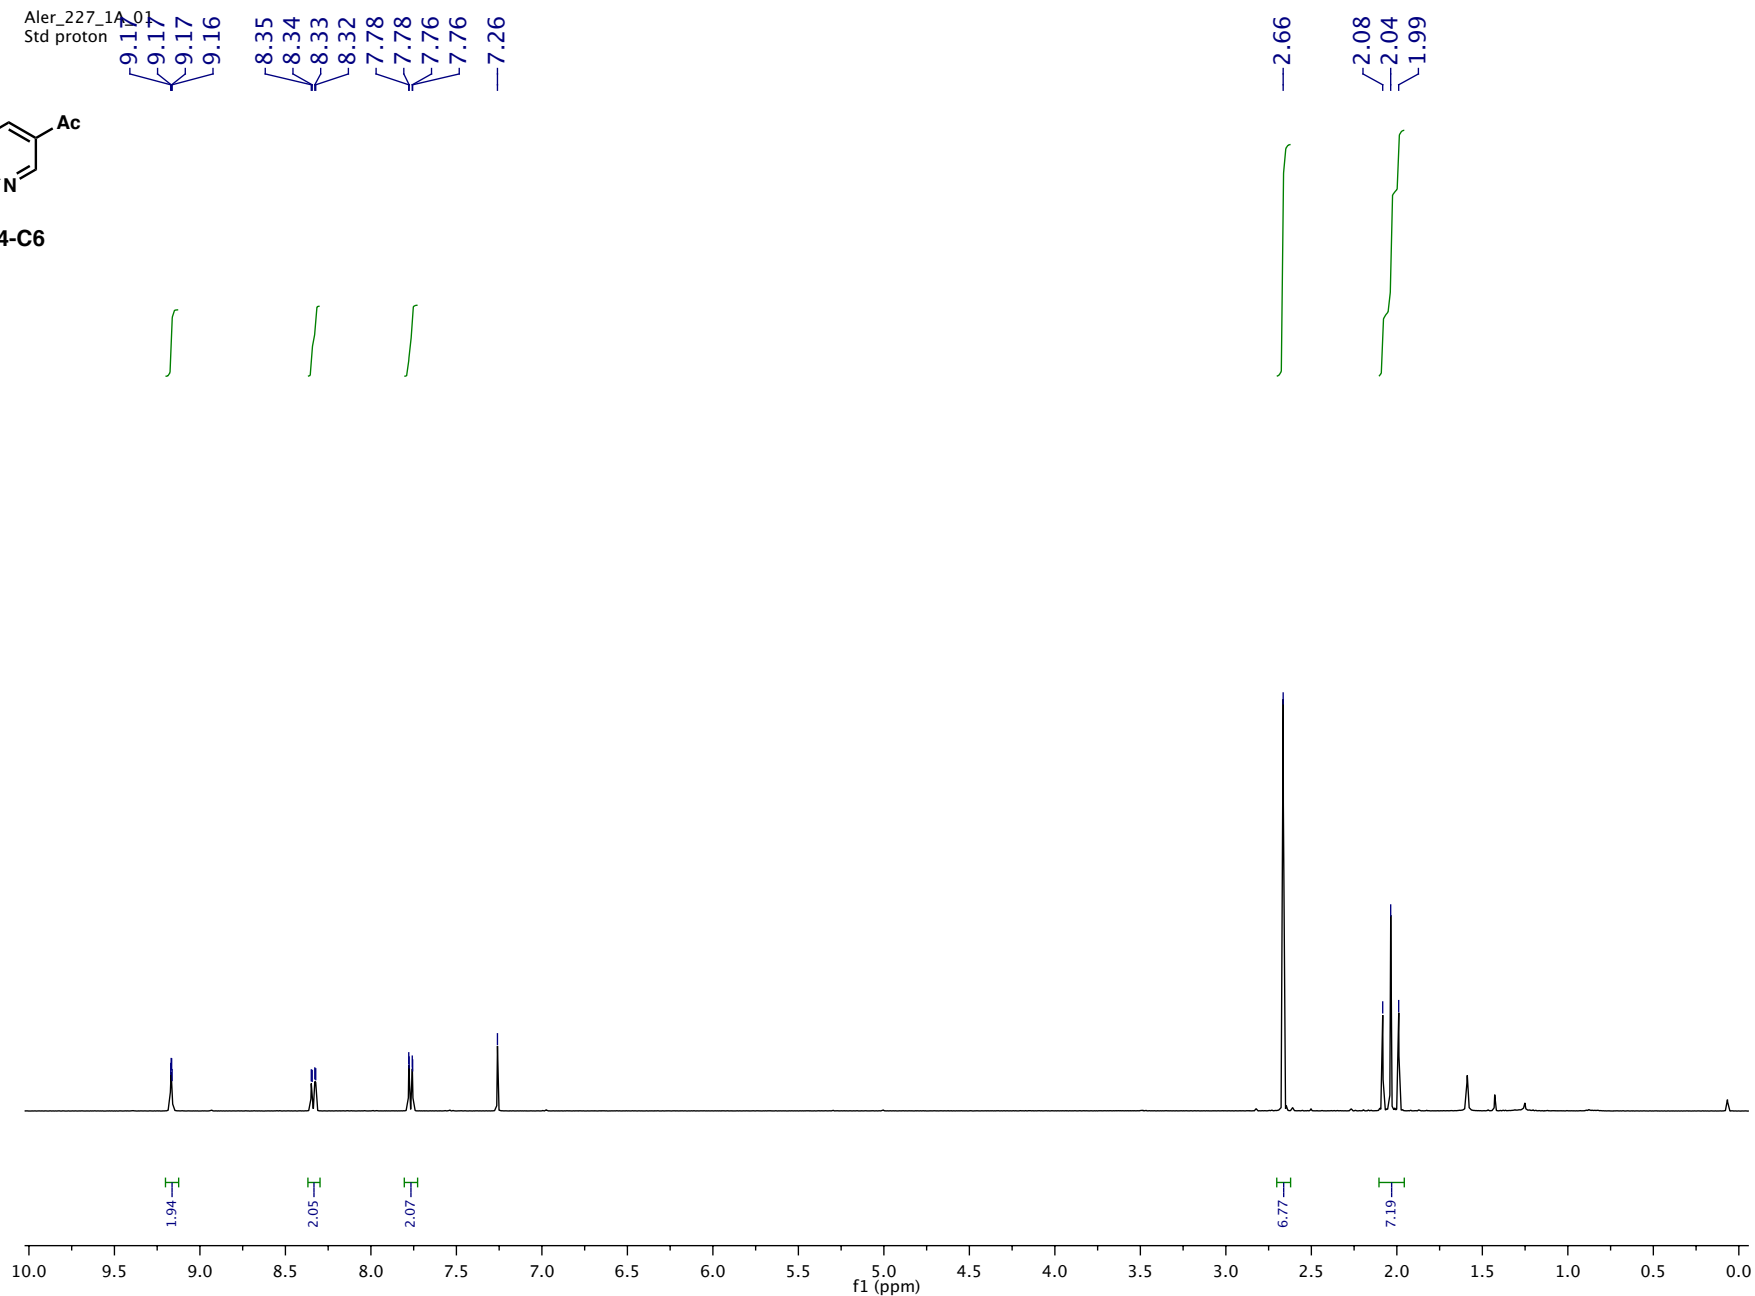

aler-227-1A-13C.1.fid  
C-13 Routine 1D, DCH CryoProbe, 10-26-2006

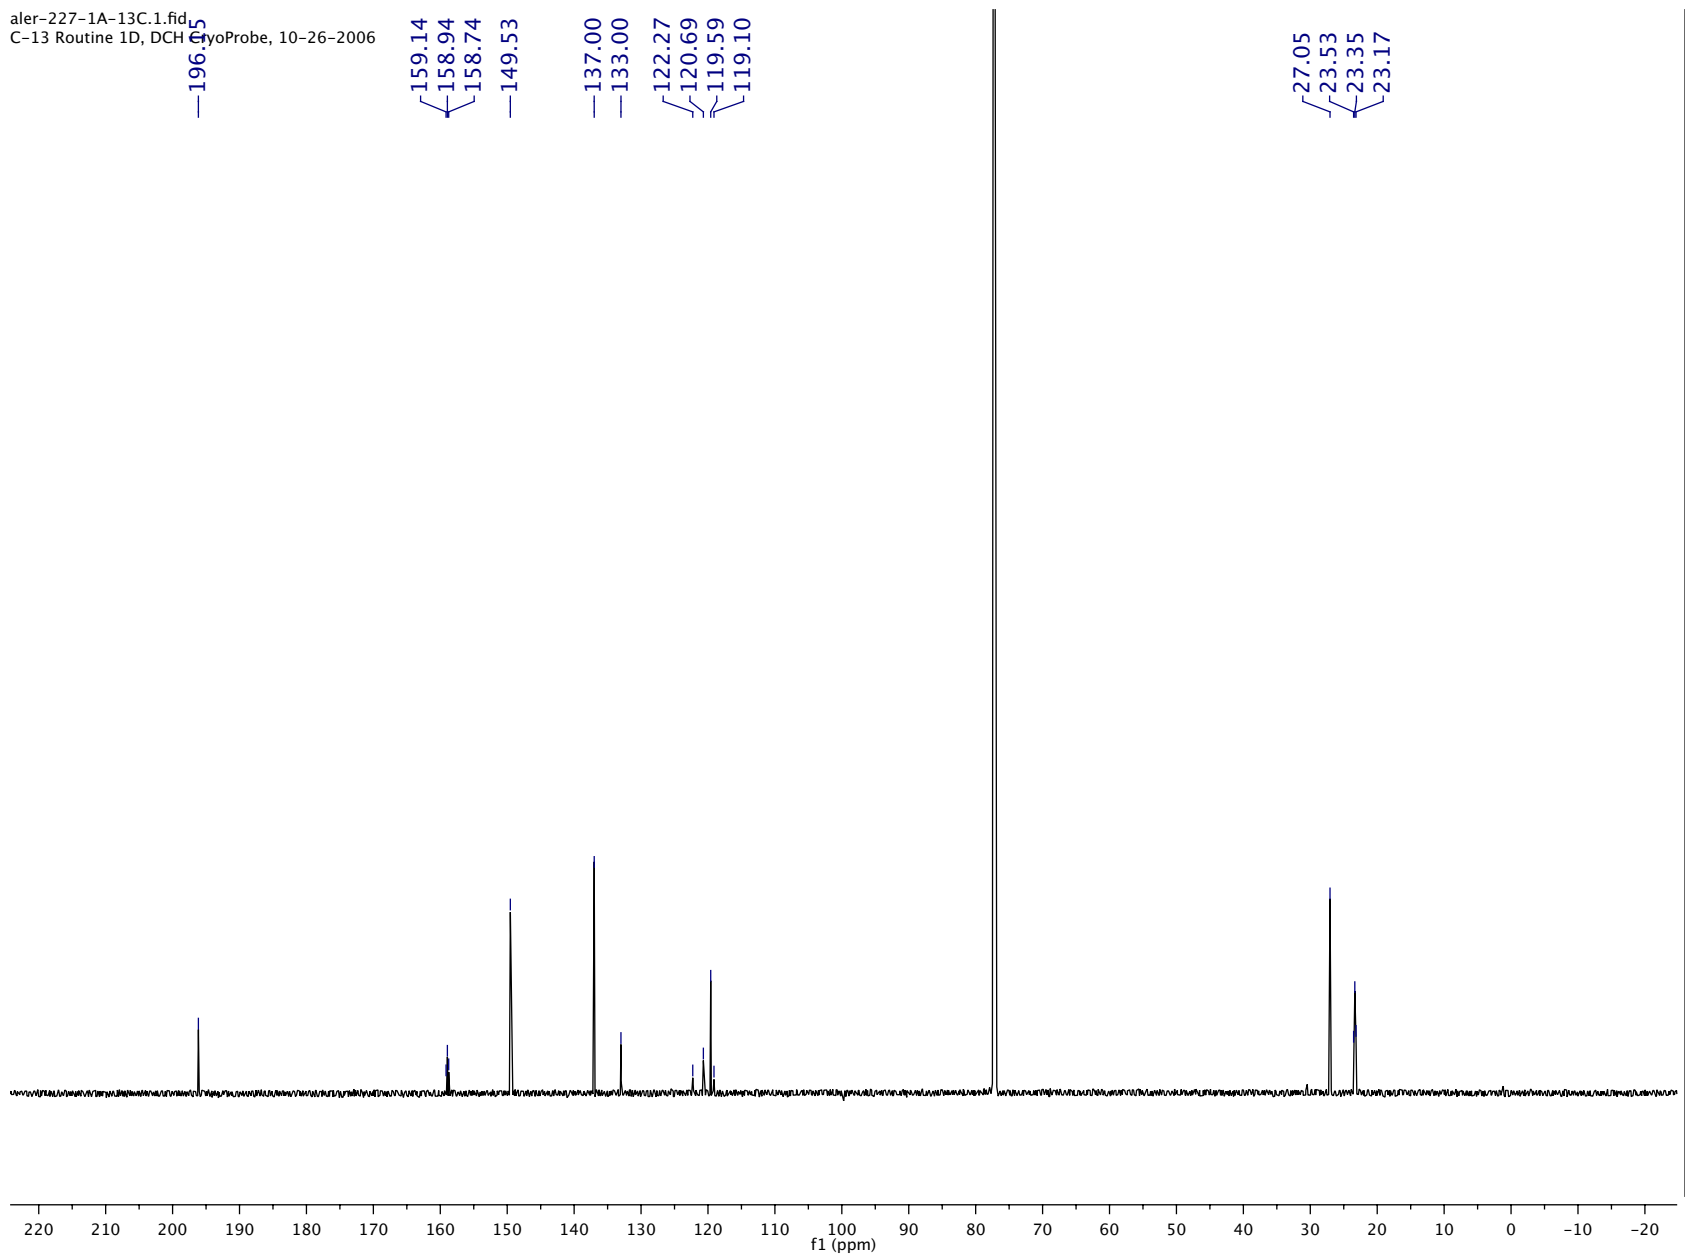

Aler\_227\_1A\_F.1.fid  
F-19, CDCl<sub>3</sub>, DPX-400 QNP Probe. CF<sub>3</sub>Cl as Ref at 0 ppm.

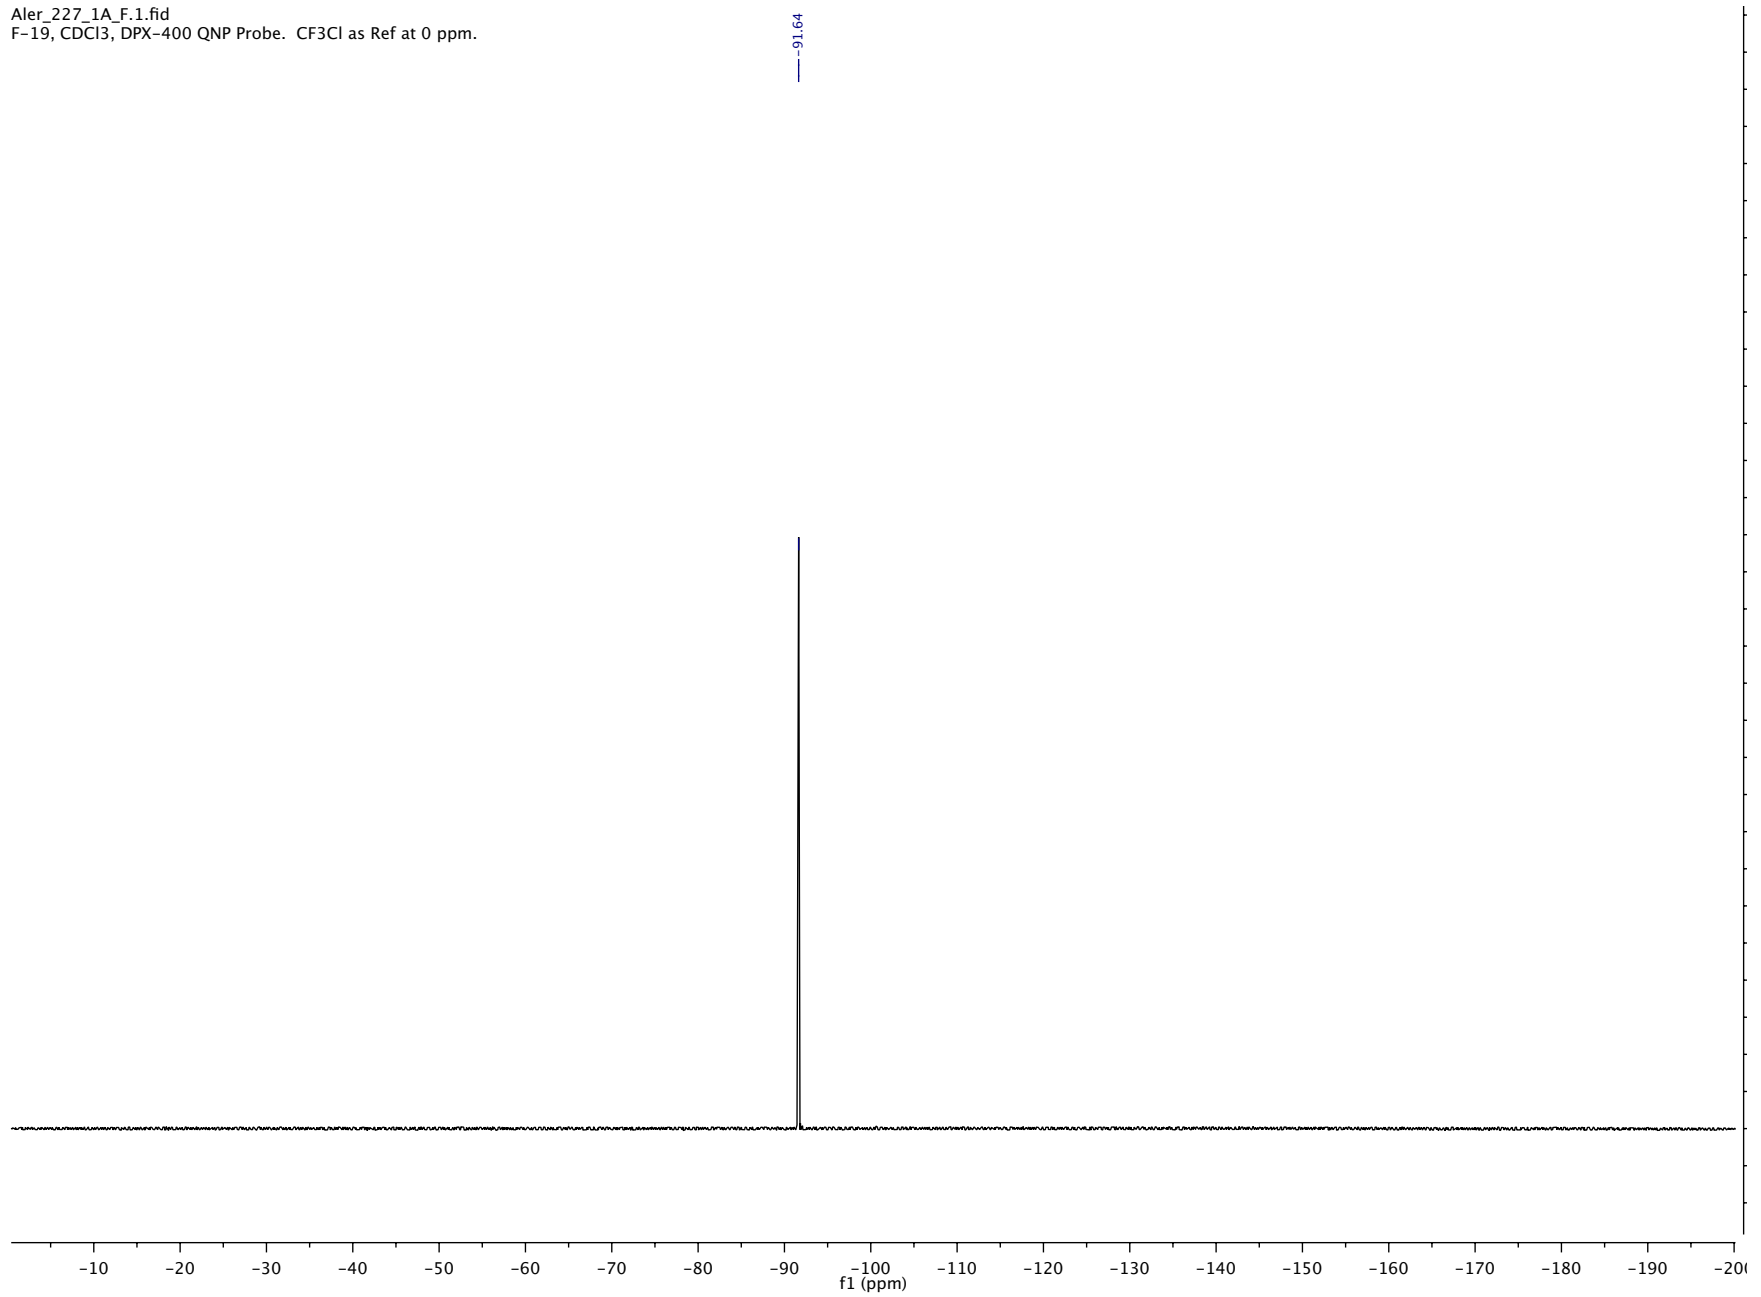

SI-53

Aler\_231\_1CL.1.fid  
Aler-231-1CL

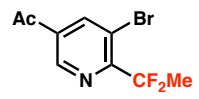

15-C6

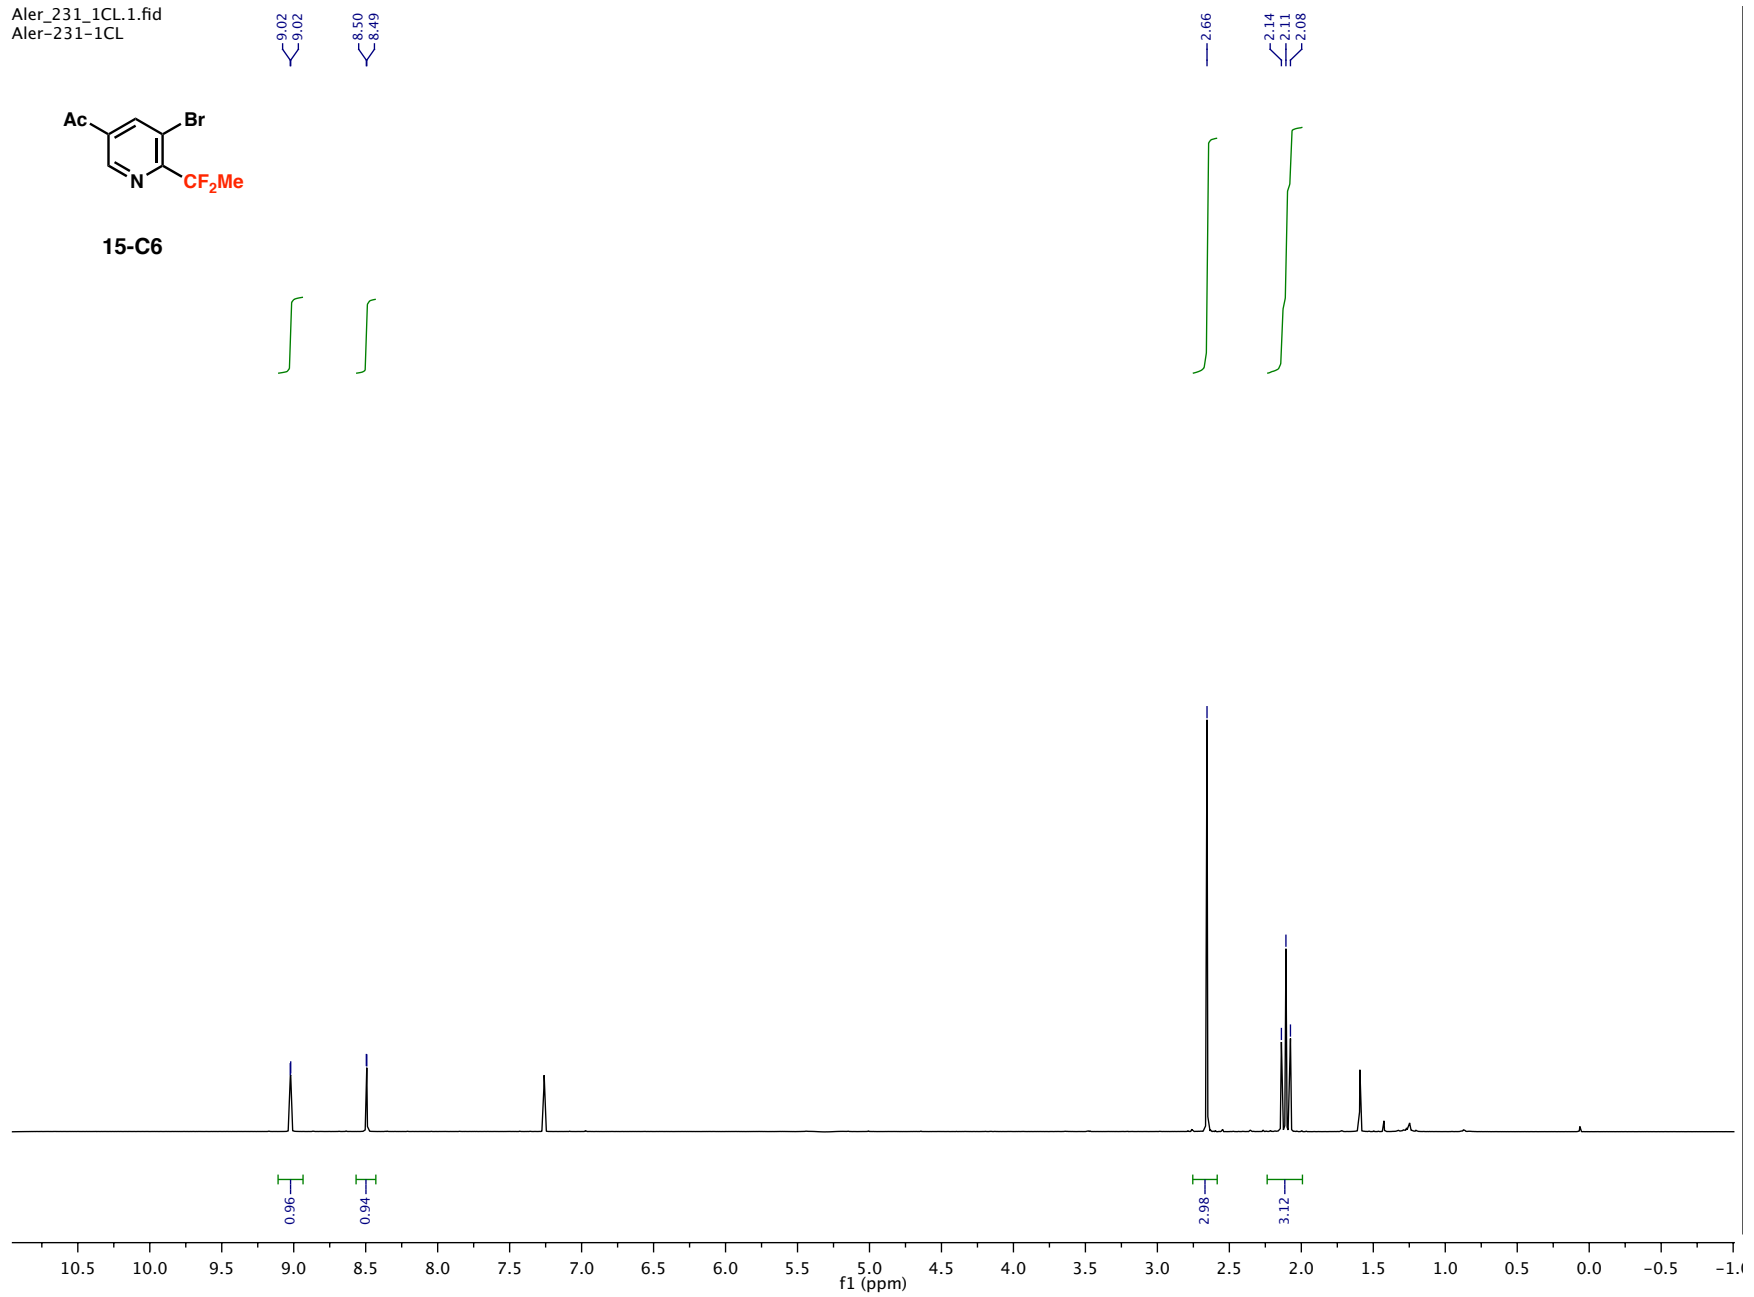

Aler\_231\_1C13.1.fid  
231-1C13

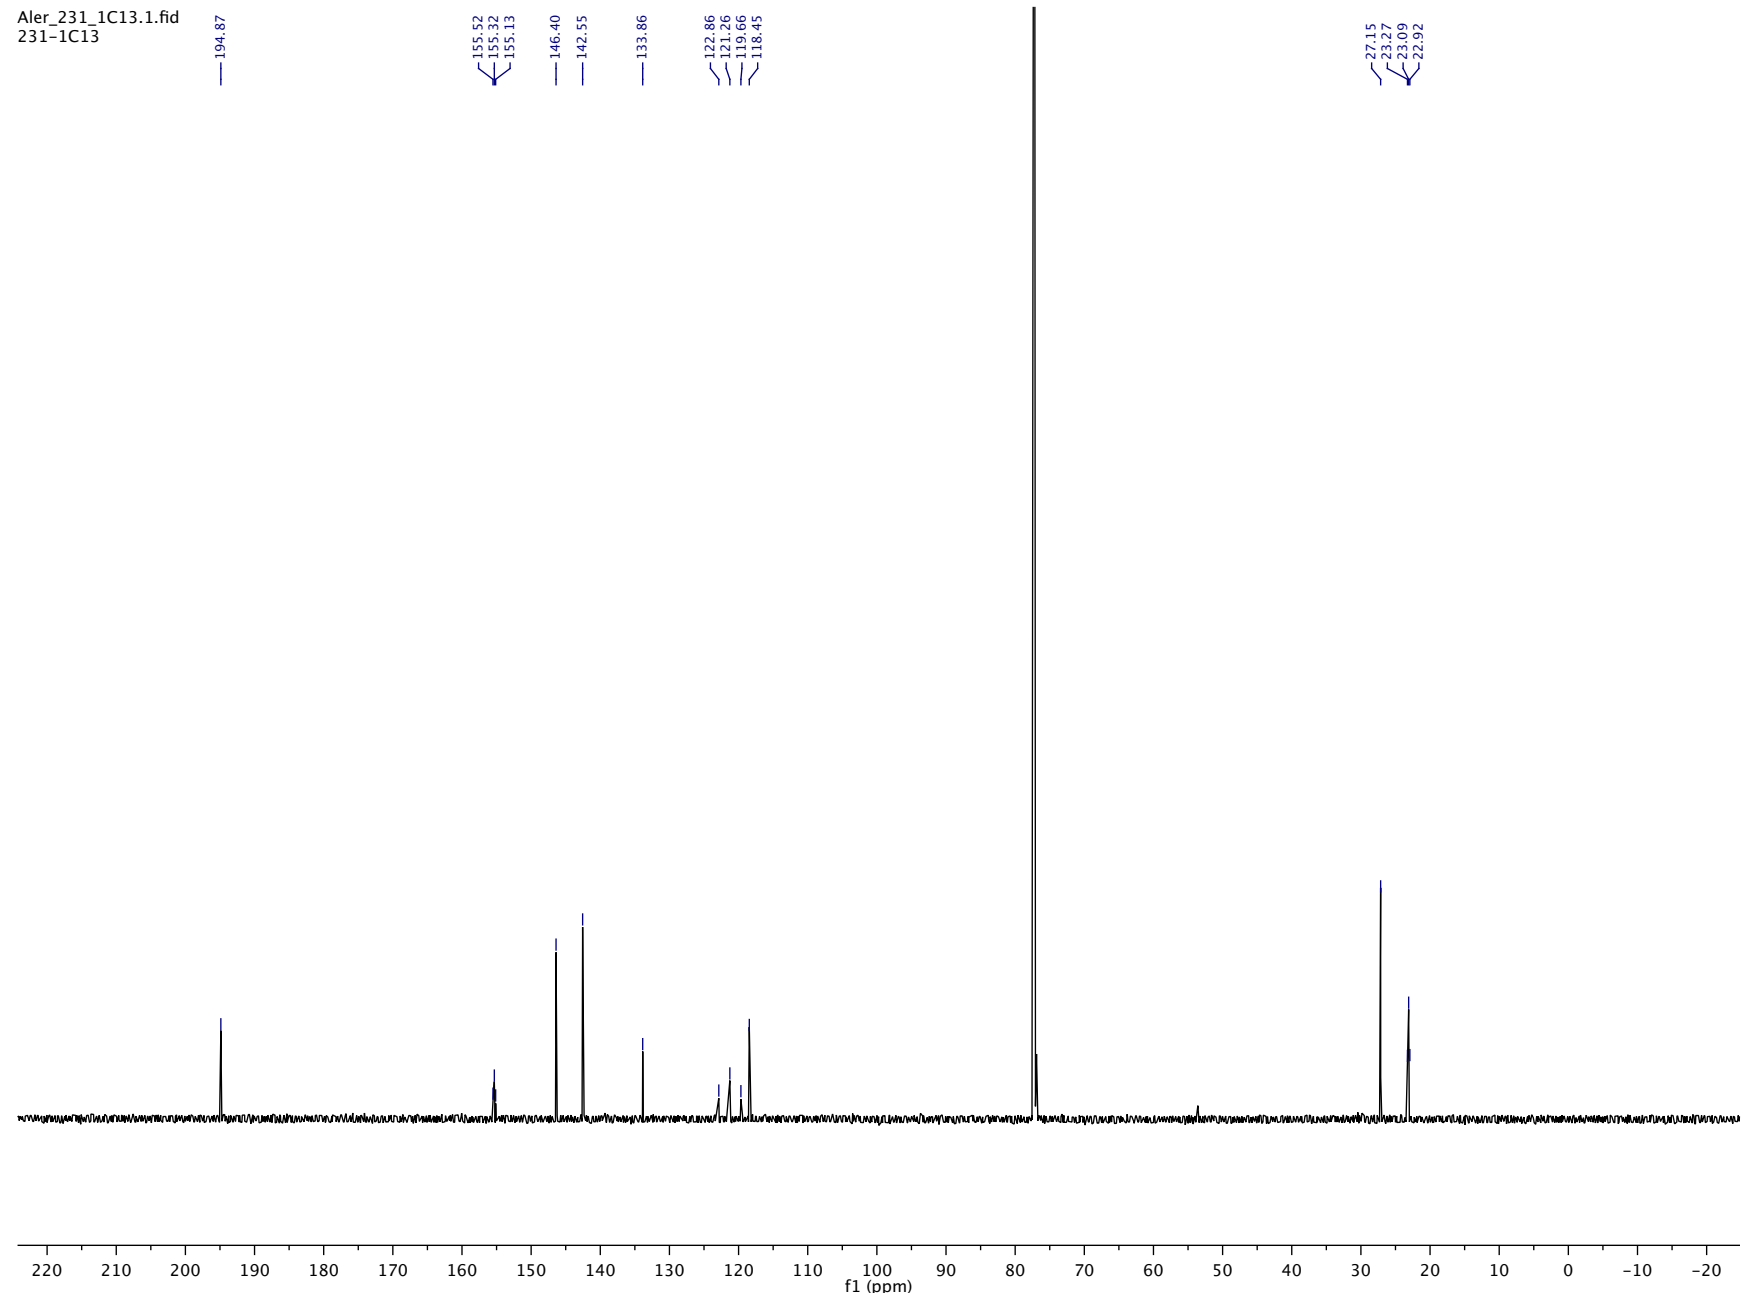

SI-55

Aler\_231\_1t\_F.1.fid  
F-19, CDCl<sub>3</sub>, DPX-400 QNP Probe. CF<sub>3</sub>Cl as Ref at 0 ppm.

--89.94

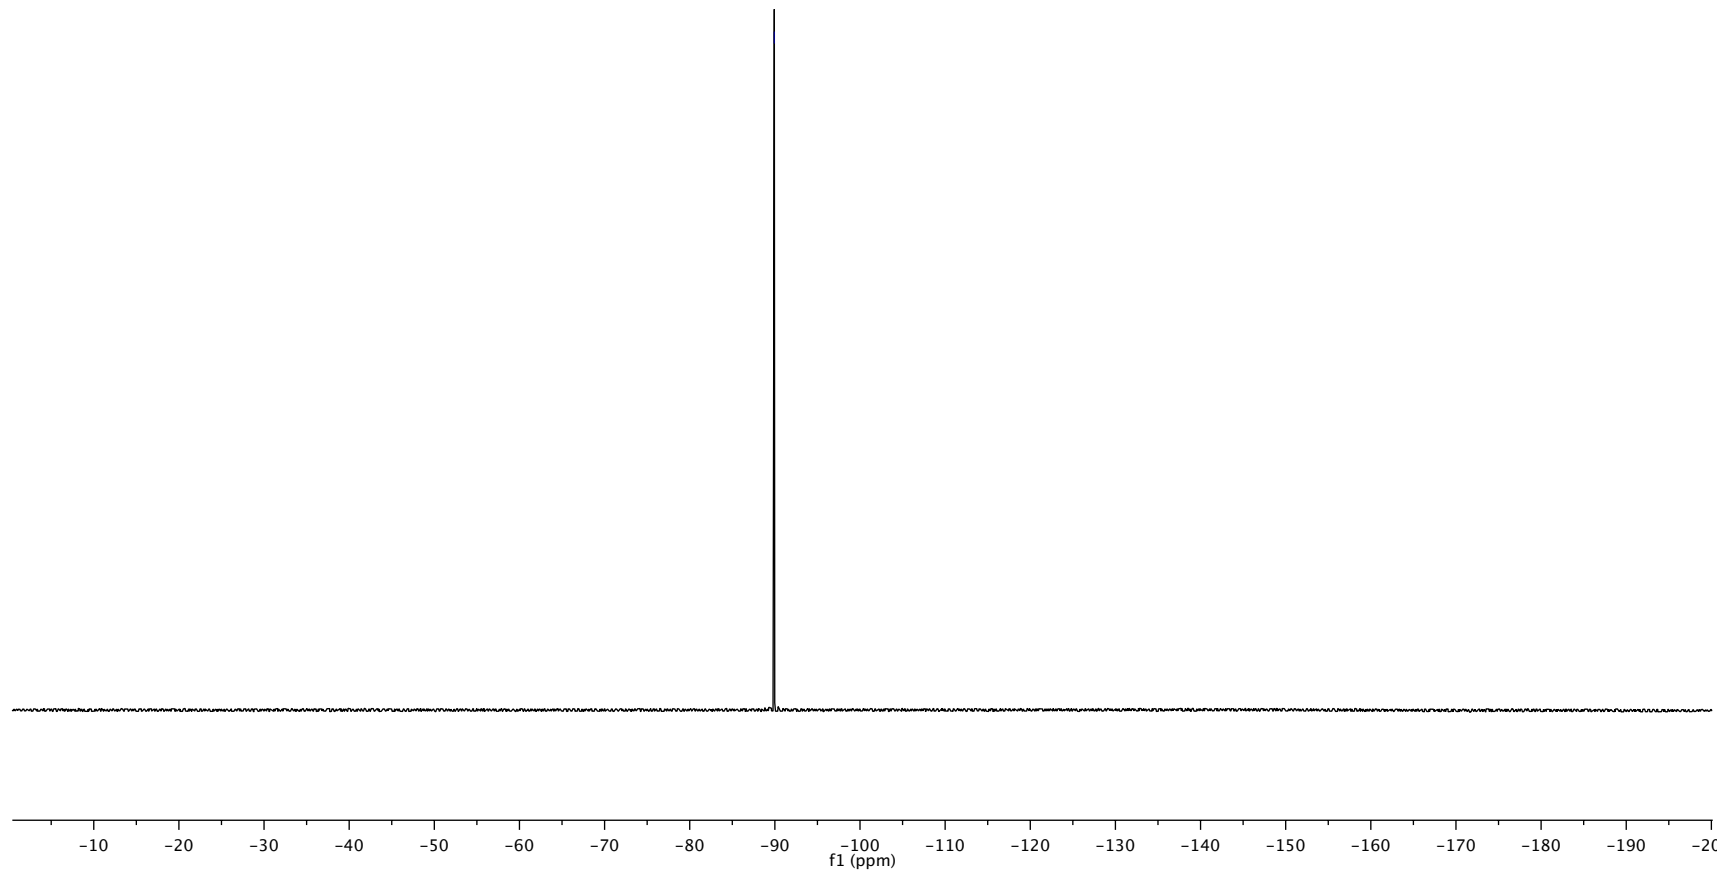

SI-56



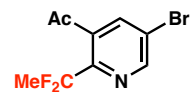

15-C2

8.85

8.43

2.59

2.13

2.09

2.04

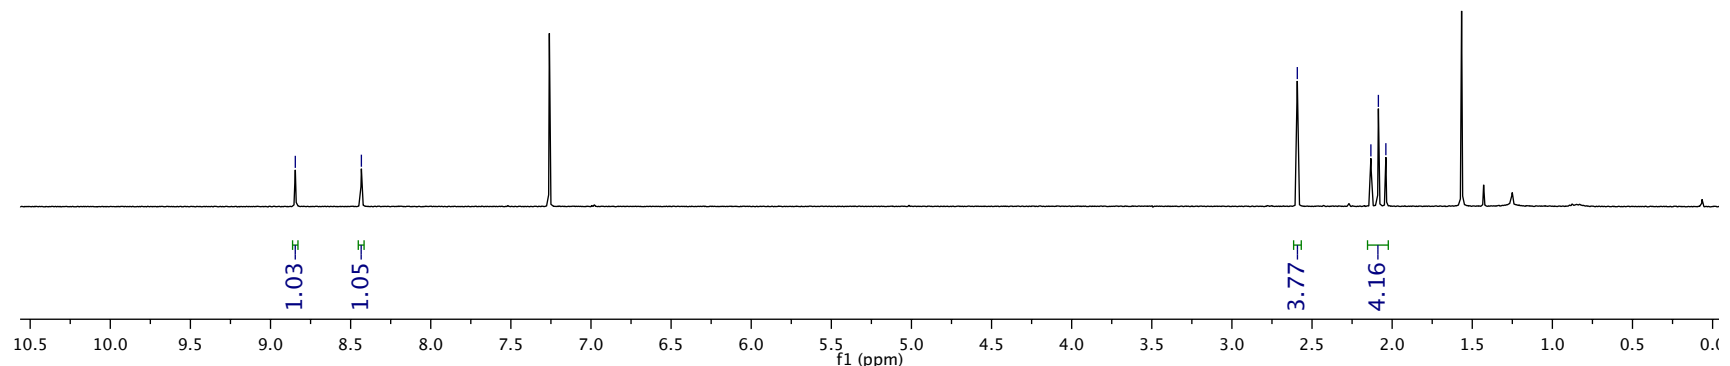

AR-231-C13superdy.1.fid  
C-13 Routine 1D, D<sub>2</sub>O CryoProbe, 10-26-2006

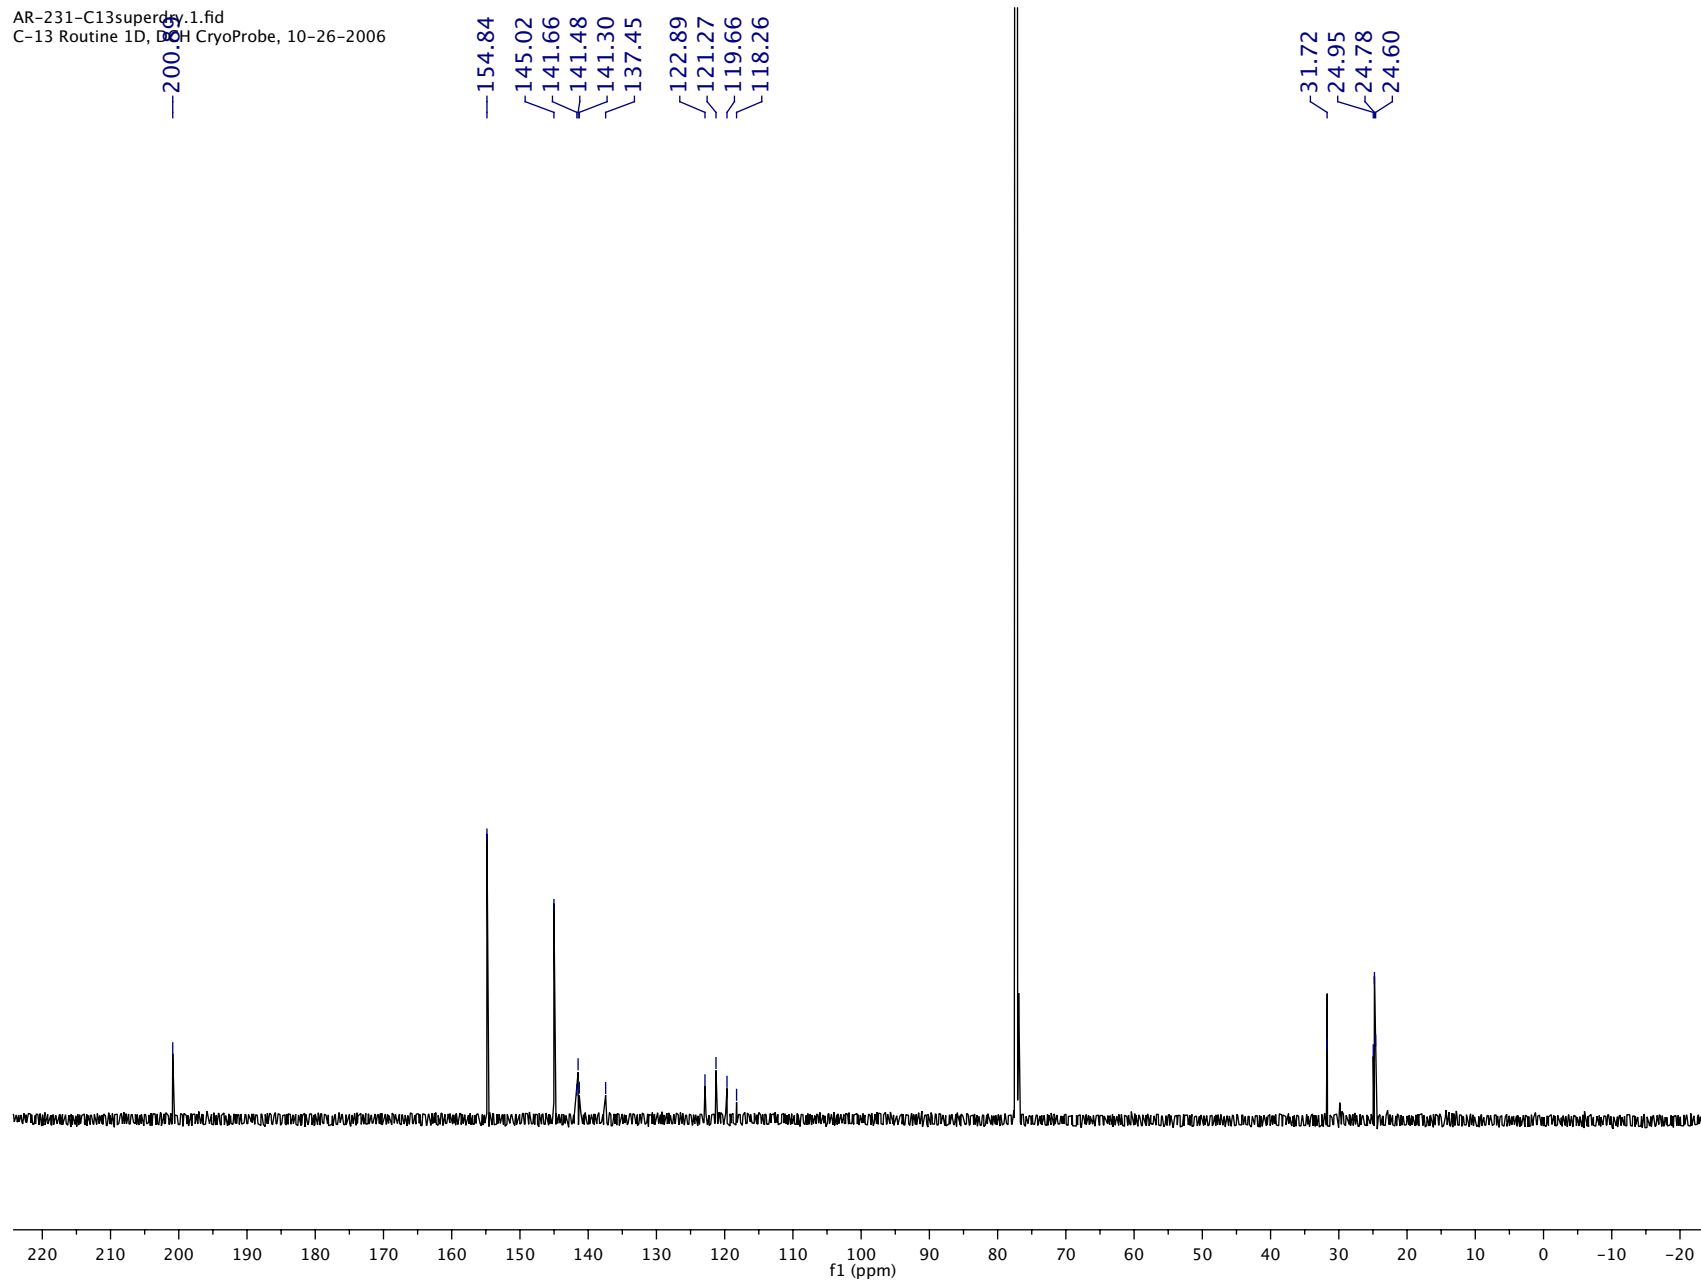

F-19, CDCl3, DPX-400 QNP Probe. CF3Cl as Ref at 0 ppm.

82.8

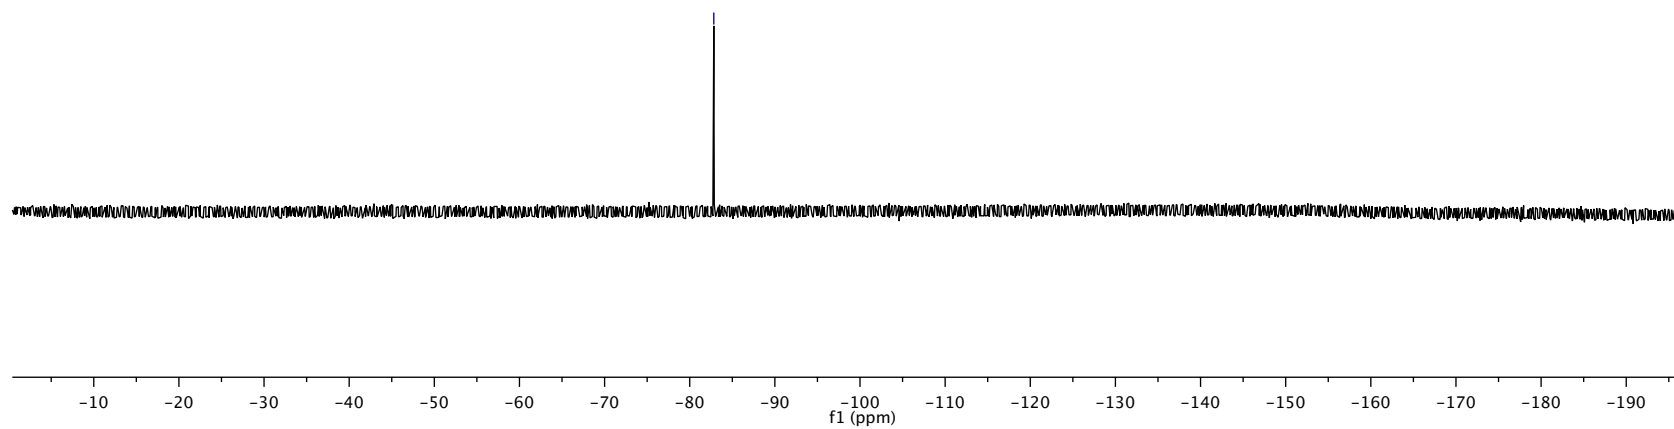

SI-59

Aler\_231\_4cl.1.fid  
H-1 Routine 1D experiment. BBO Probe 9-18-2007

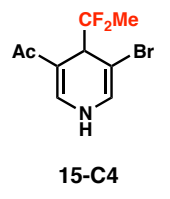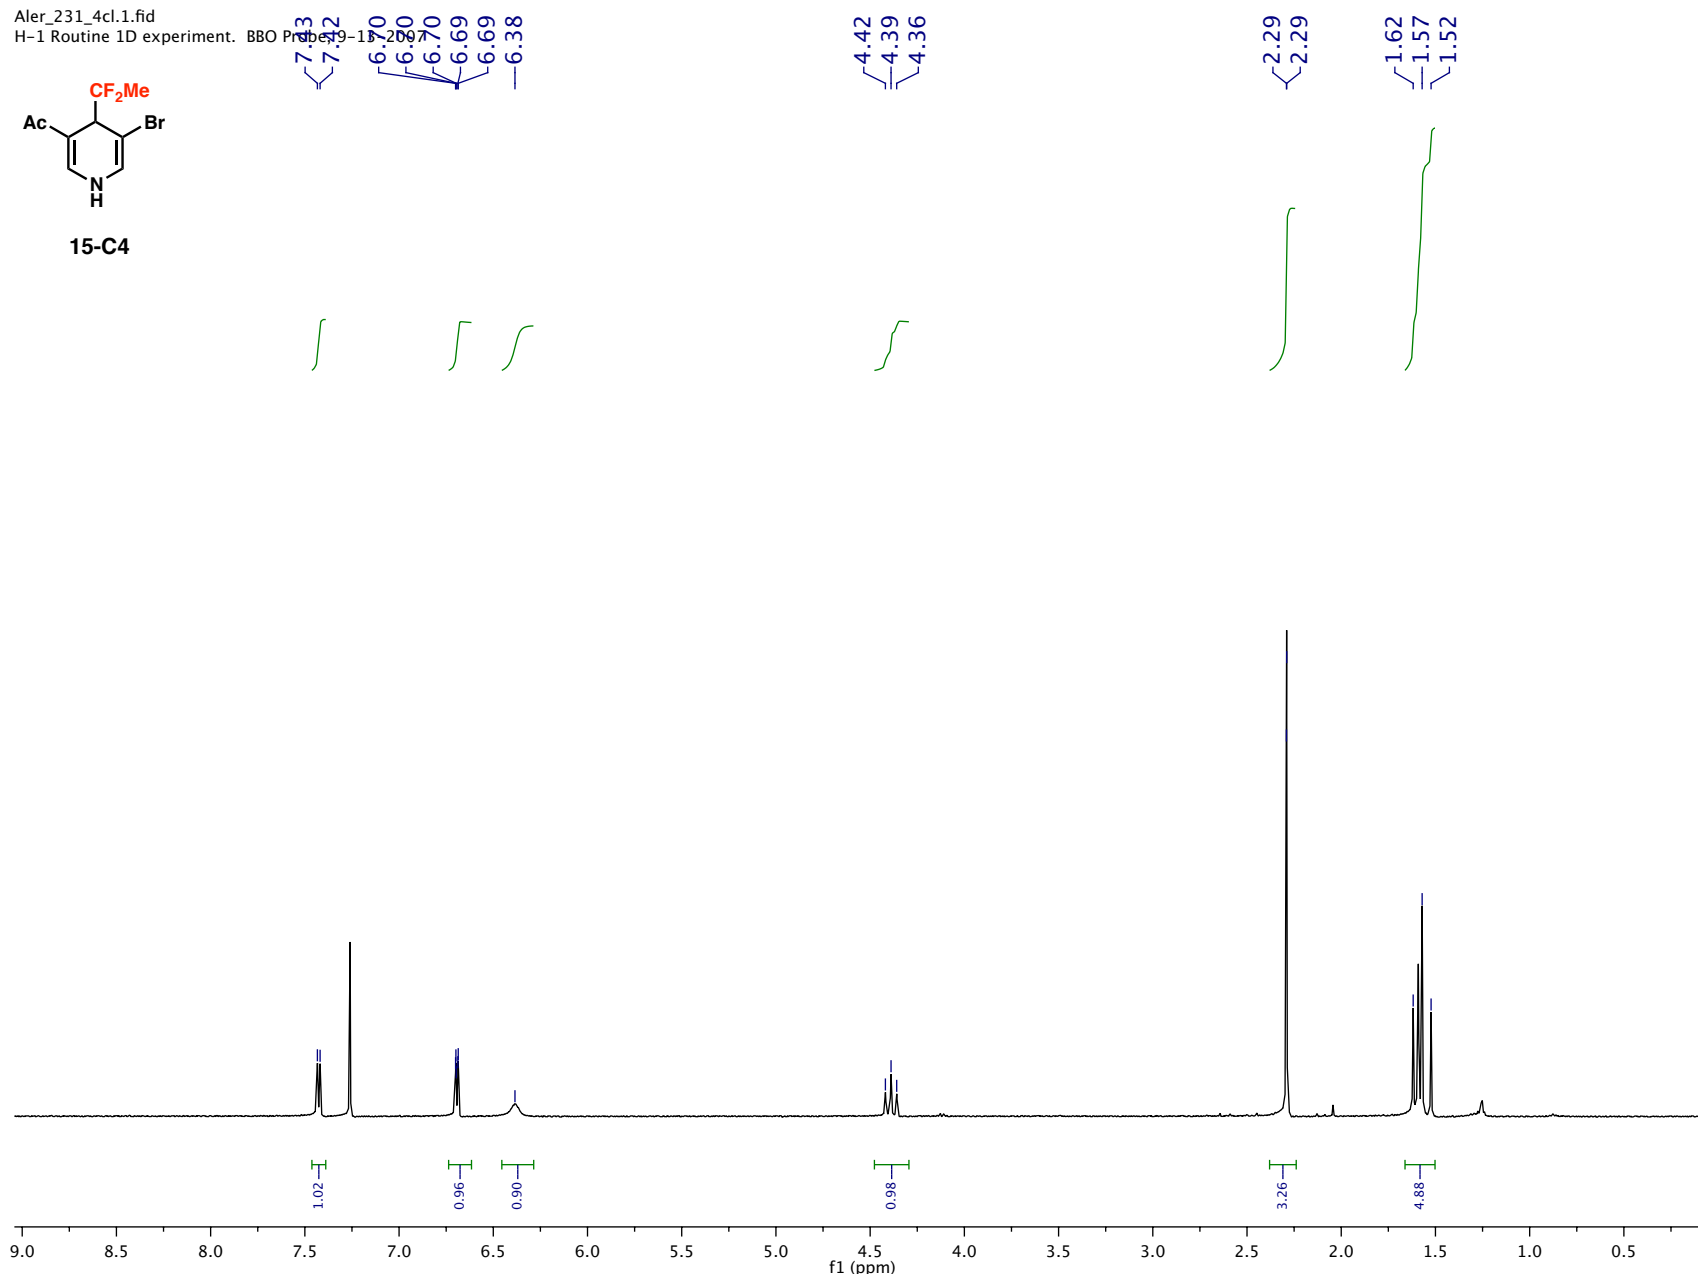

ales-231-4-13C.1.fid  
C-13 Routine 1D, DCH CryoProbe, 10-26-2006

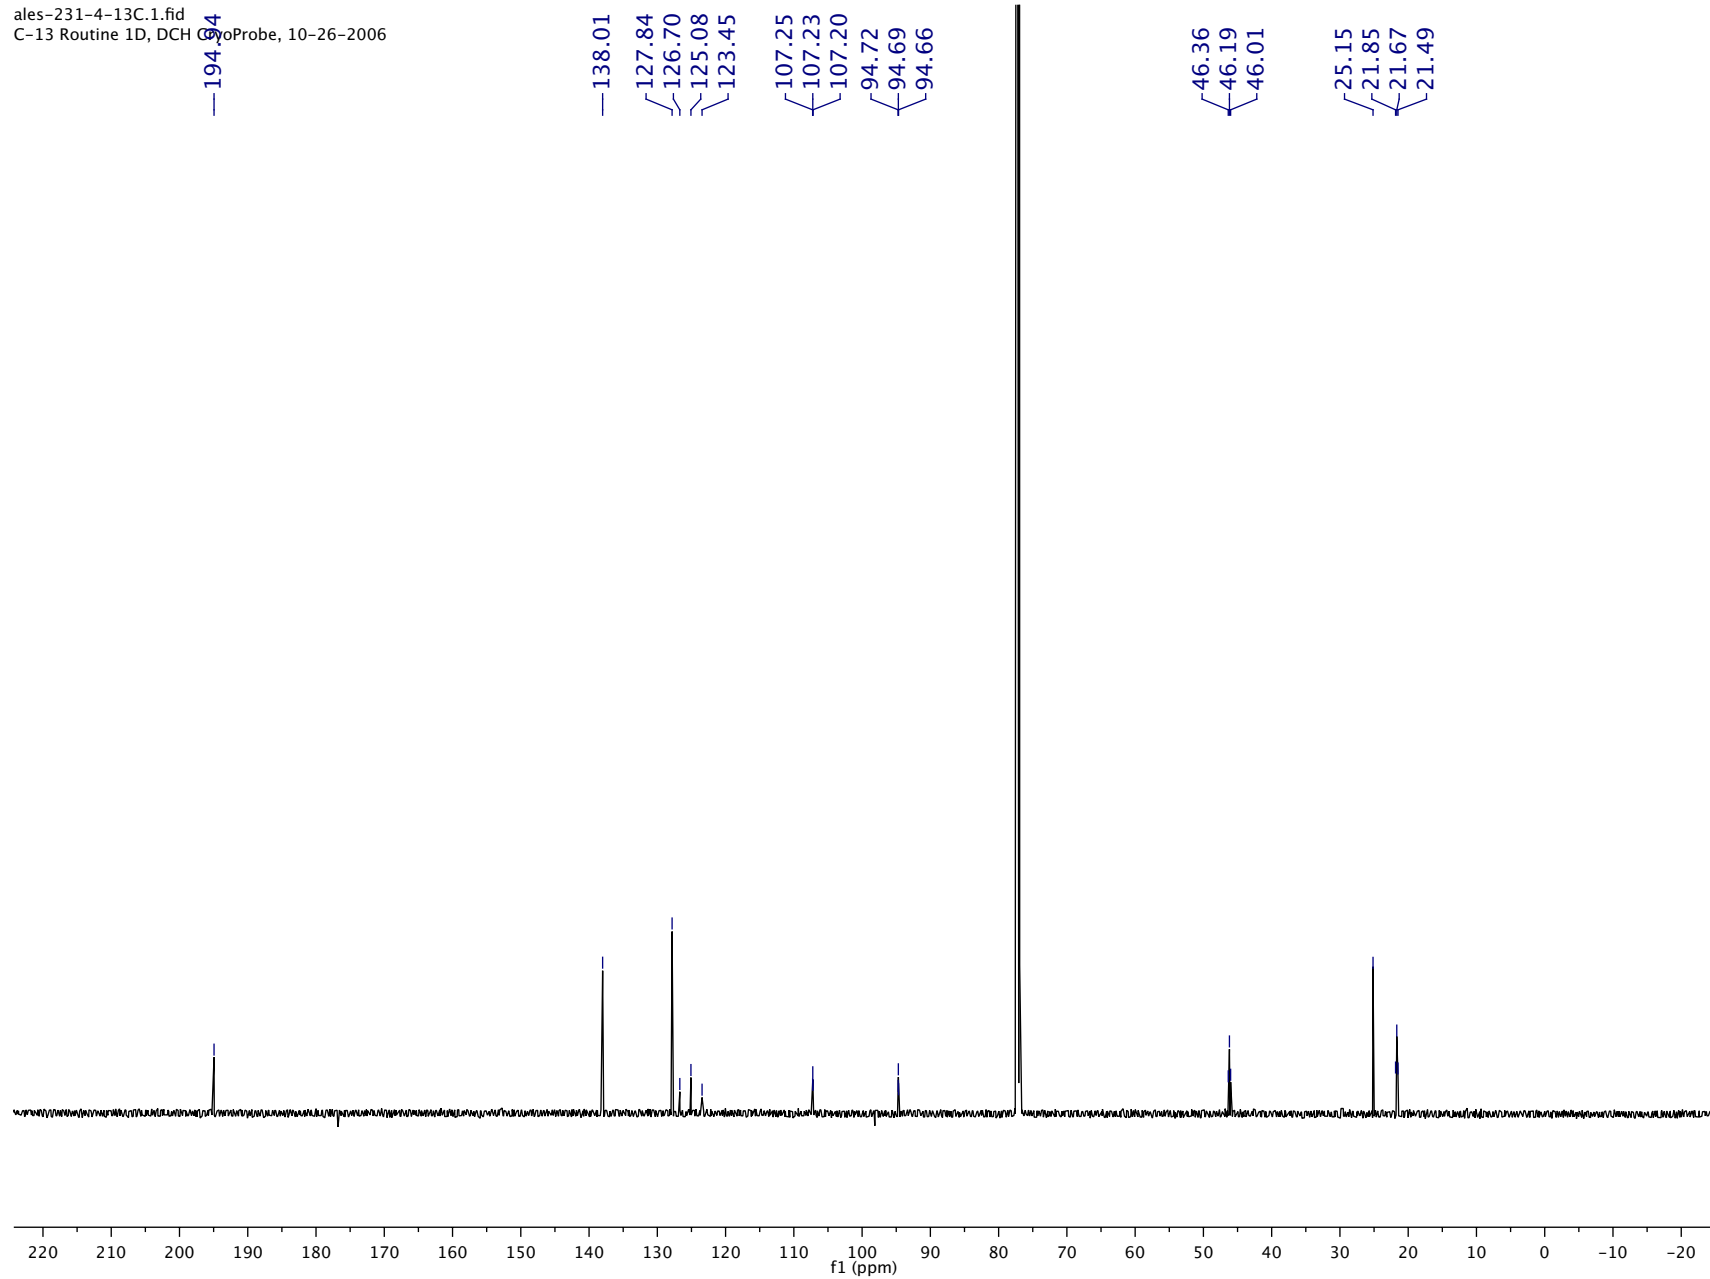

SI-61

Aler\_231\_4\_F.1.fid  
F-19, CDCl3, DPX-400 QNP Probe. CF3Cl as Ref at 0 ppm.

96.57  
97.20  
97.64  
98.28

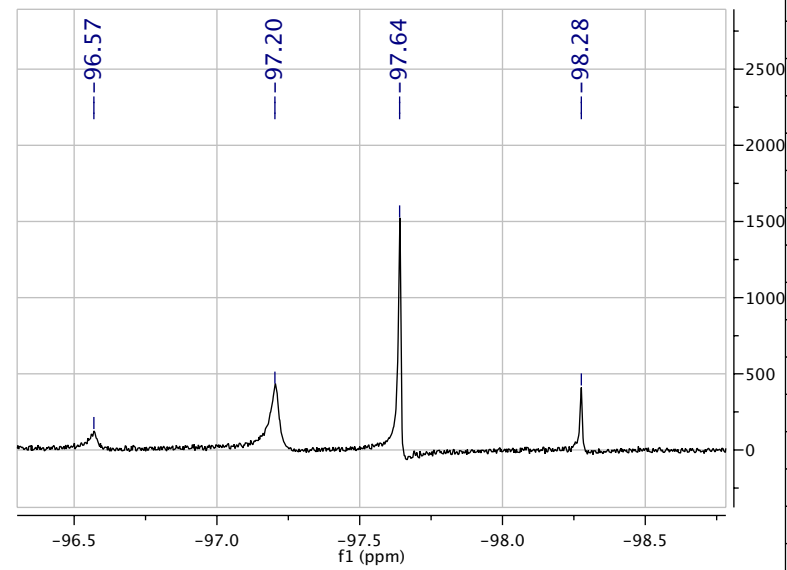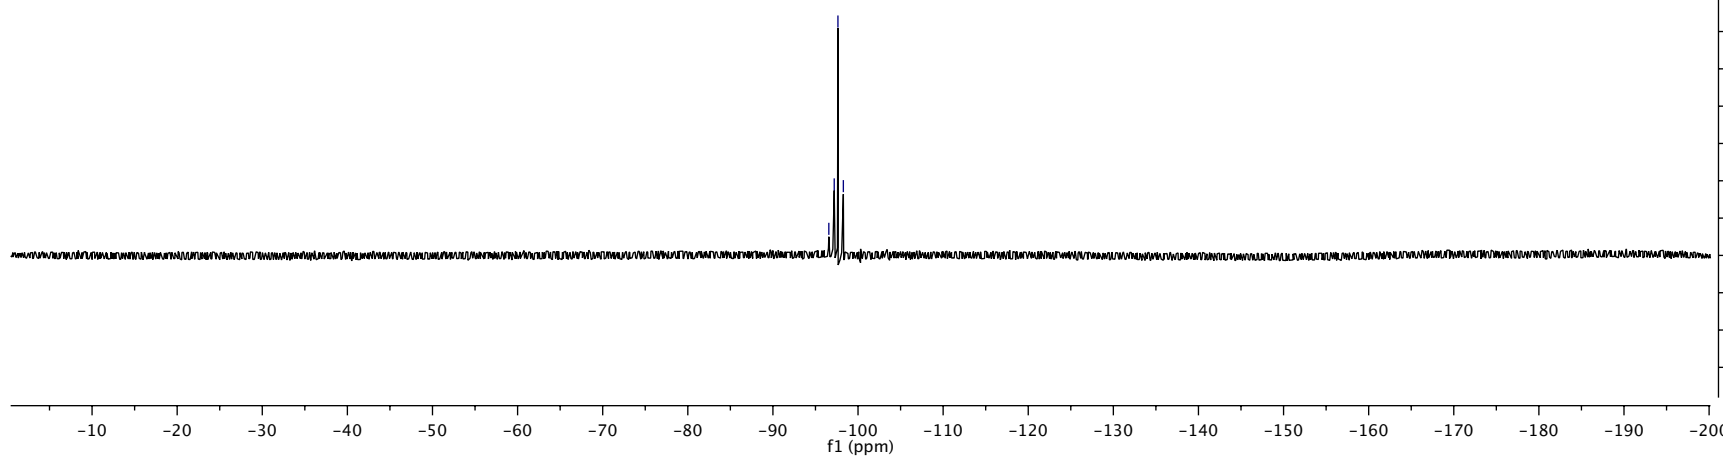

SI-62

Aler\_240\_3coldry.1.fid  
H-1 Routine 1D experiment. BBO Probe 9-13-2007

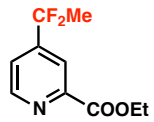

16-C4

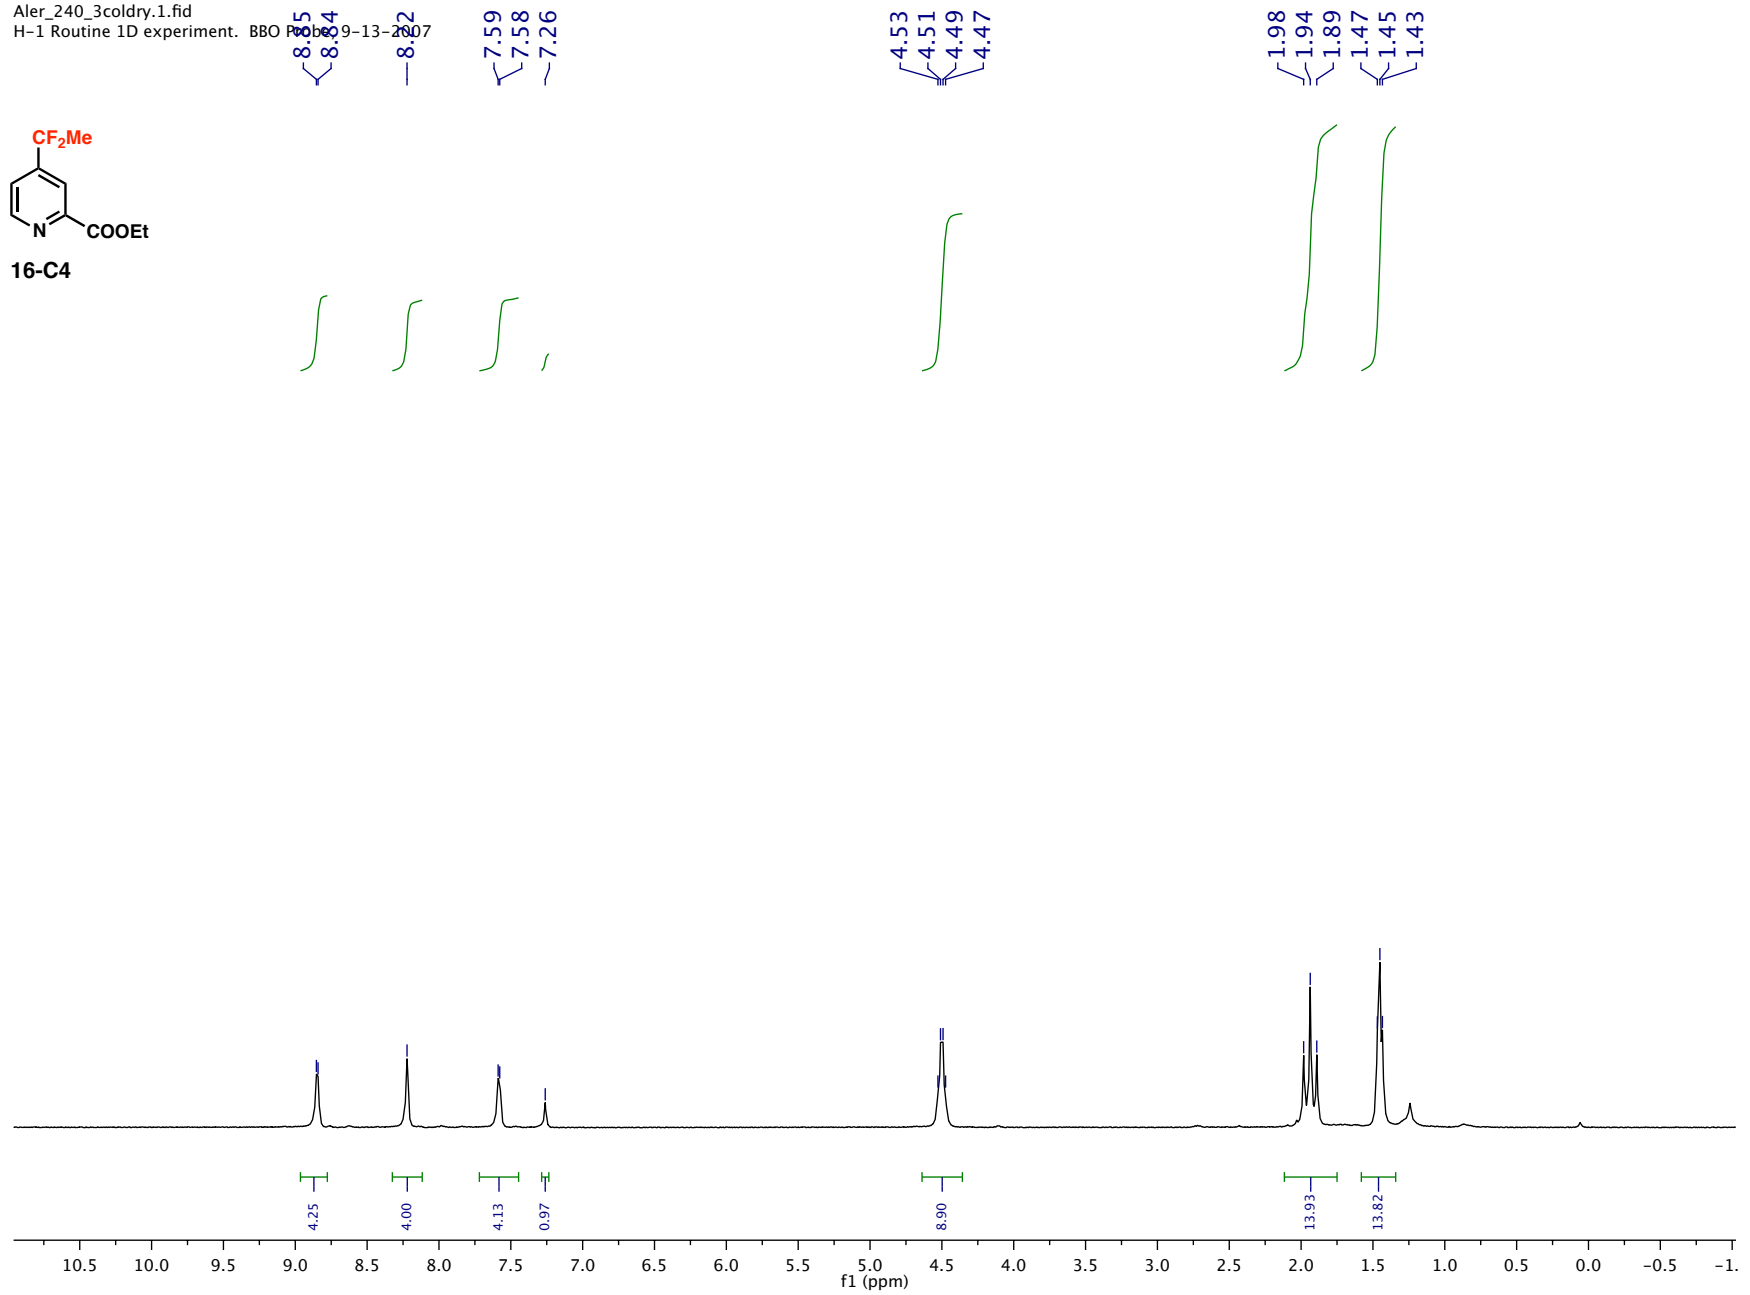

SI-63

AR\_240\_3\_C13.1.fid  
C-13 Routine 1D, 125 MHz CryoProbe

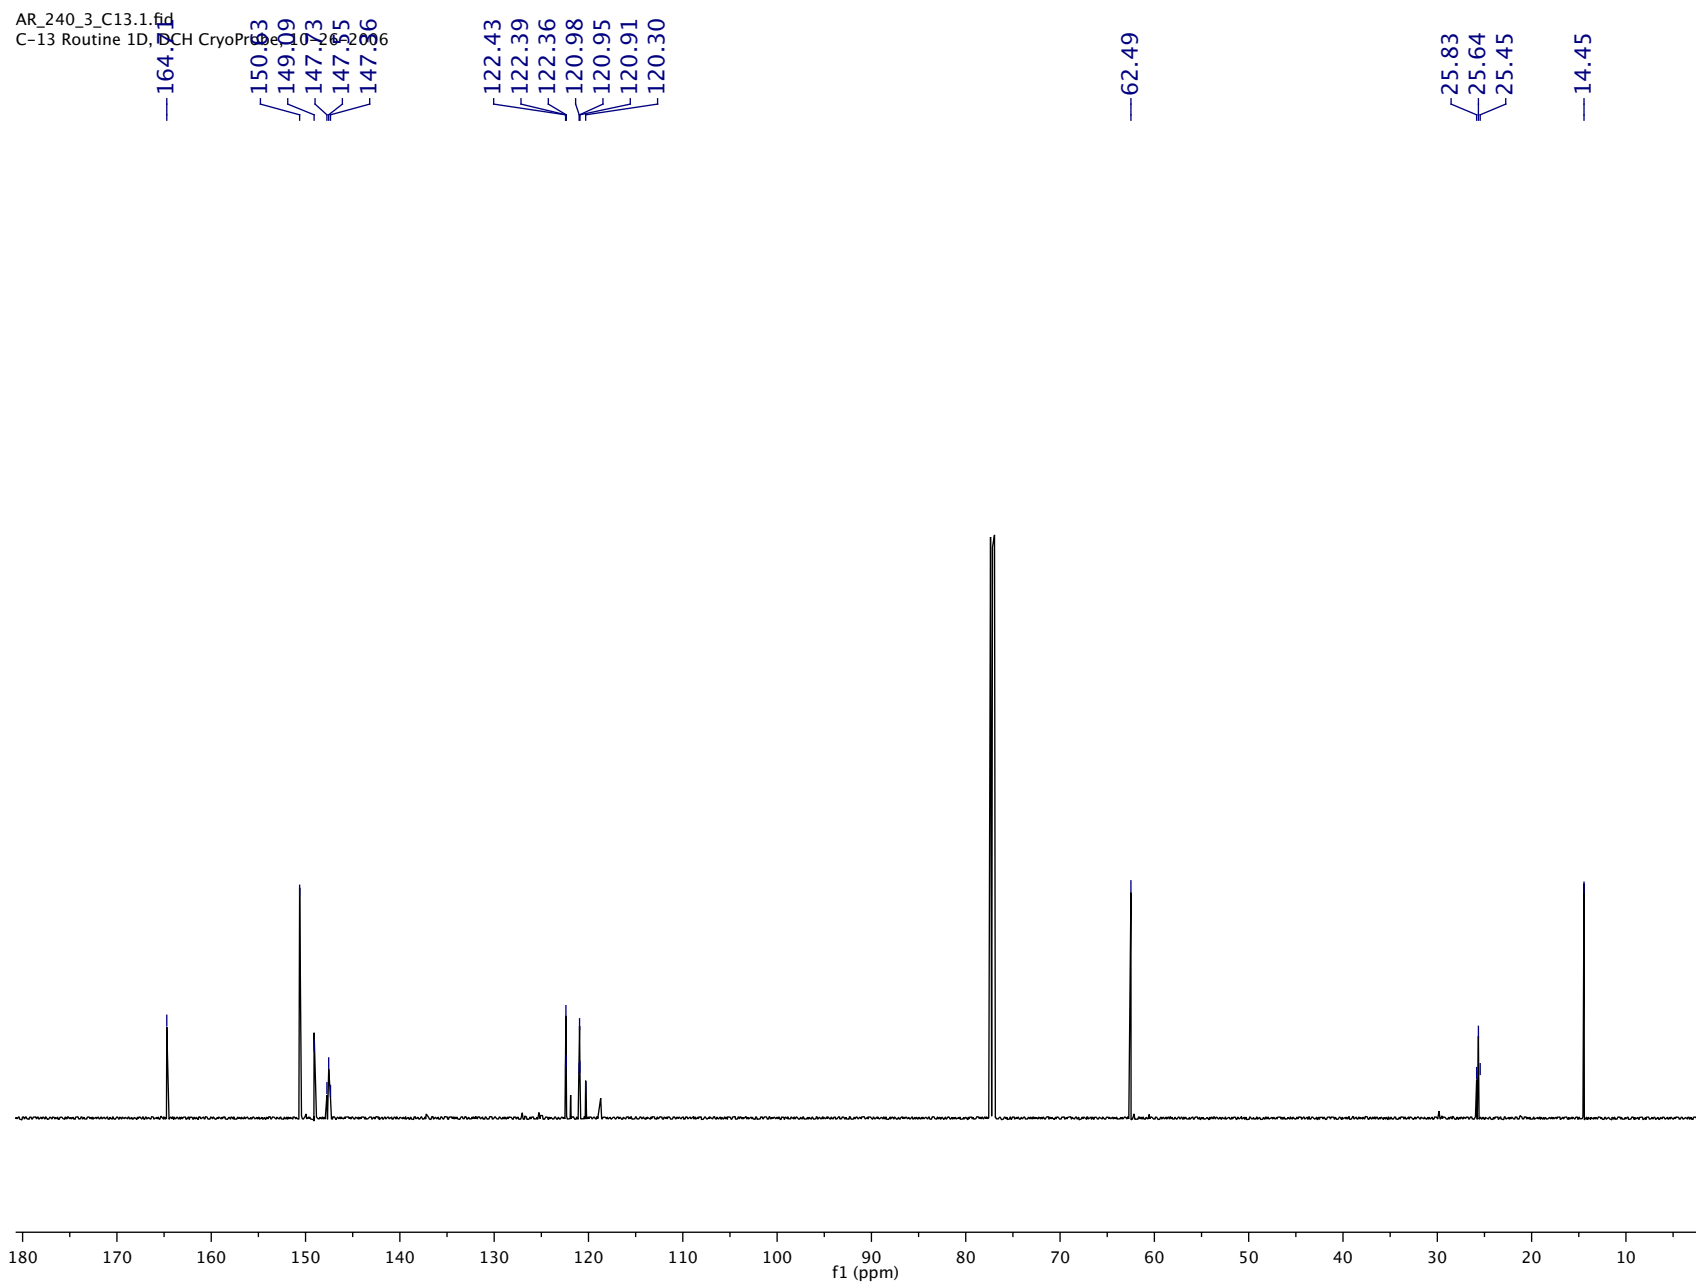



AR-240-3-F.555.fid  
F-19, CDCl3, DPX-400 QNP Probe. CF3Cl as Ref at 0 ppm.

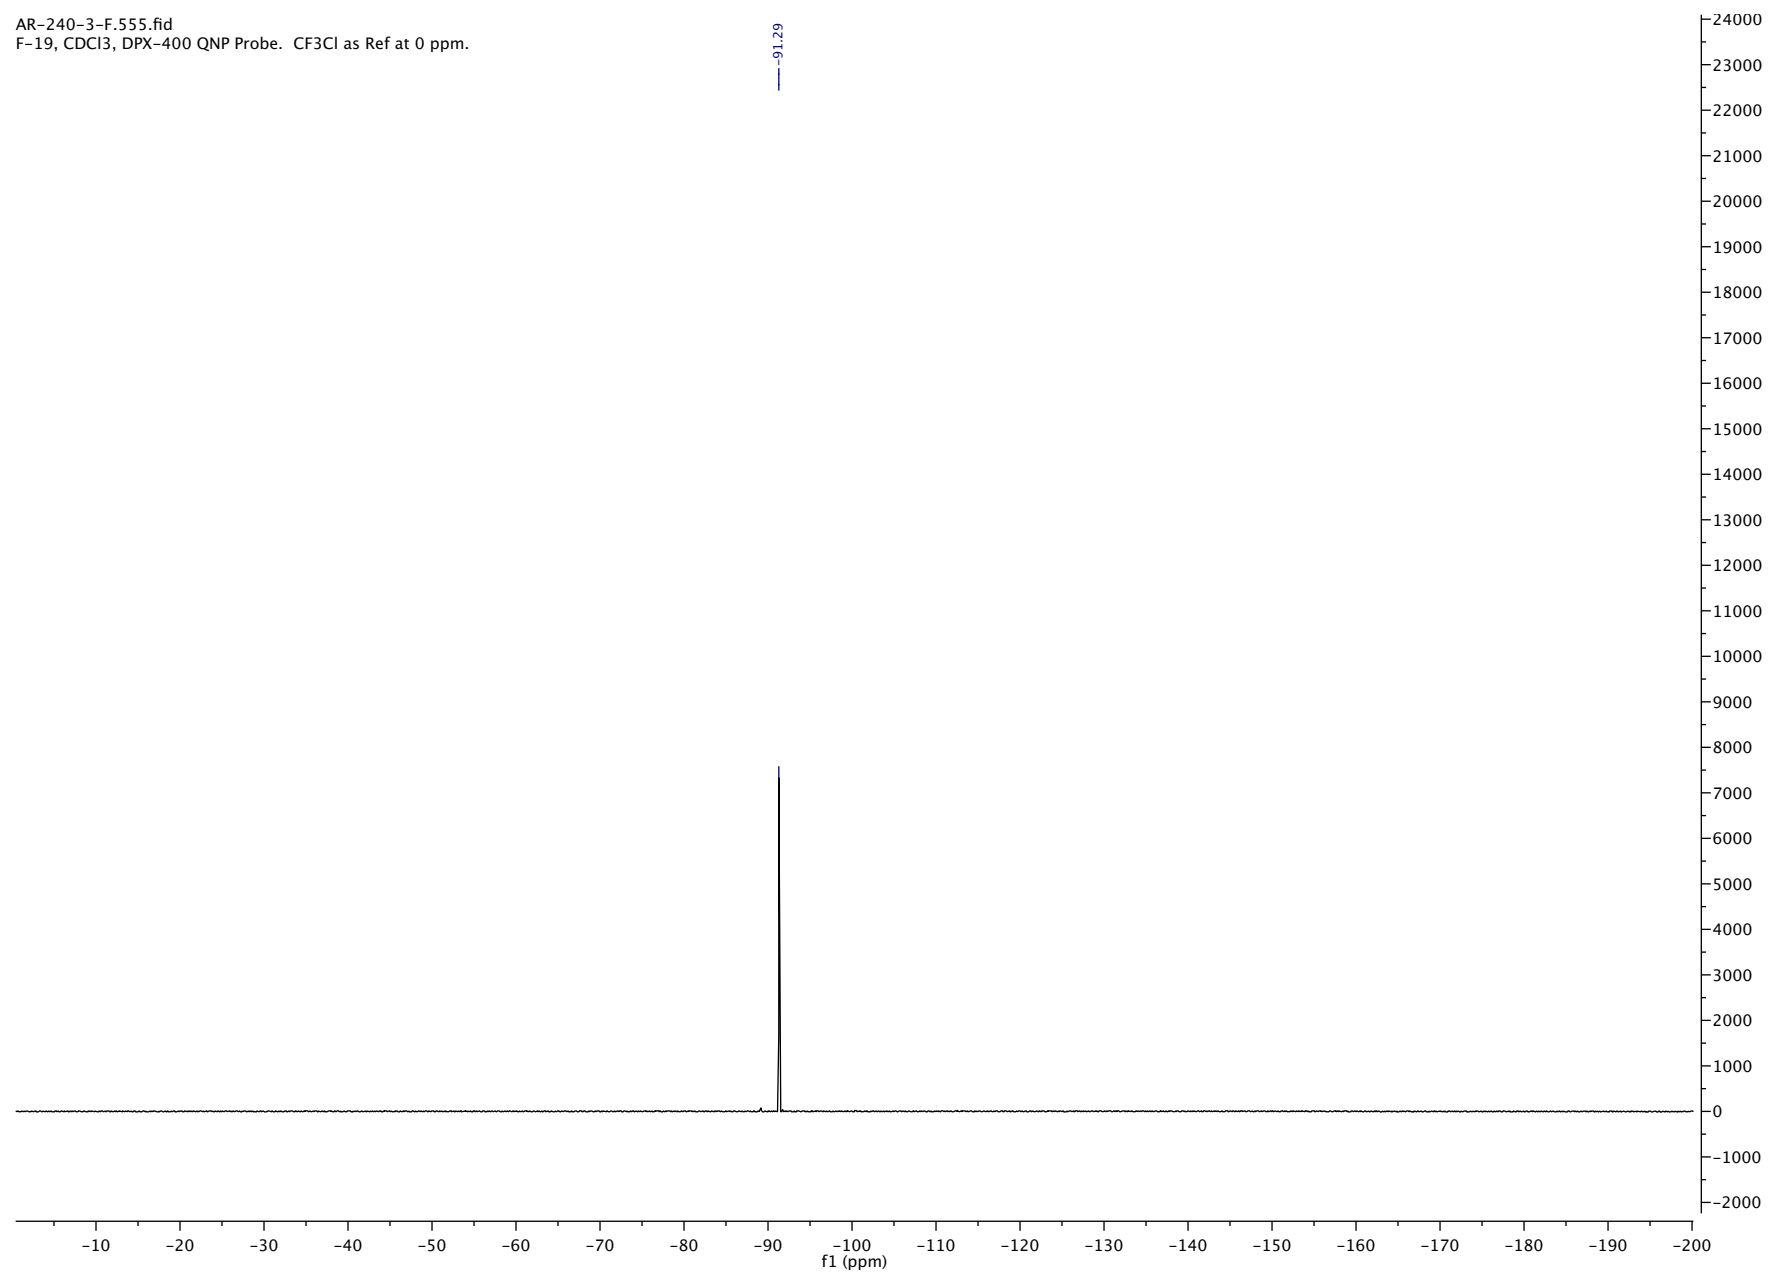

SI-65

AR\_240\_1-2.1.fid  
H-1 Routine 1D, DCH

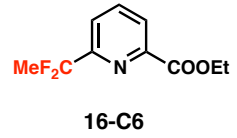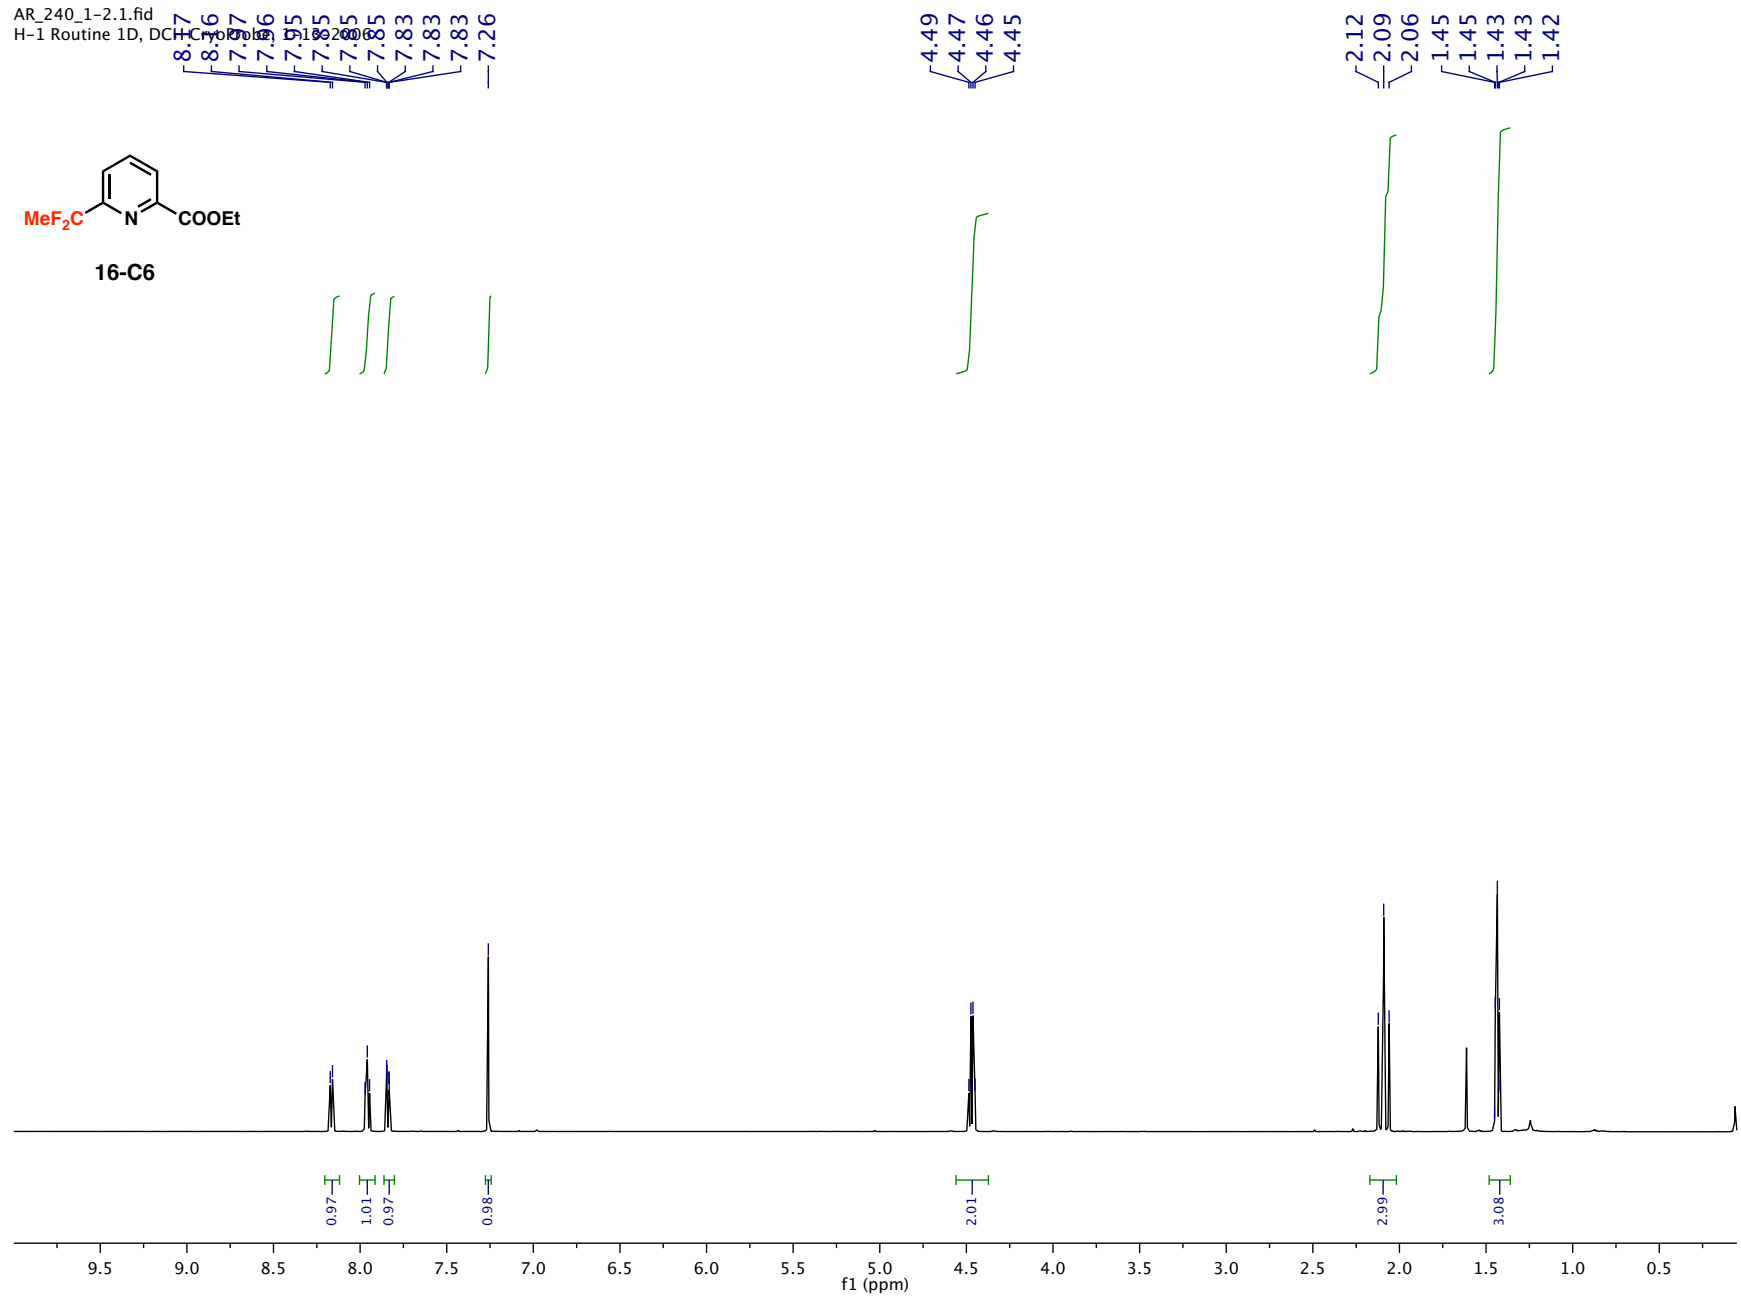

AR\_240\_1-2\_C13.1.hd  
C-13 Routine 1D, DCH CryoProbe, 10-26-2006

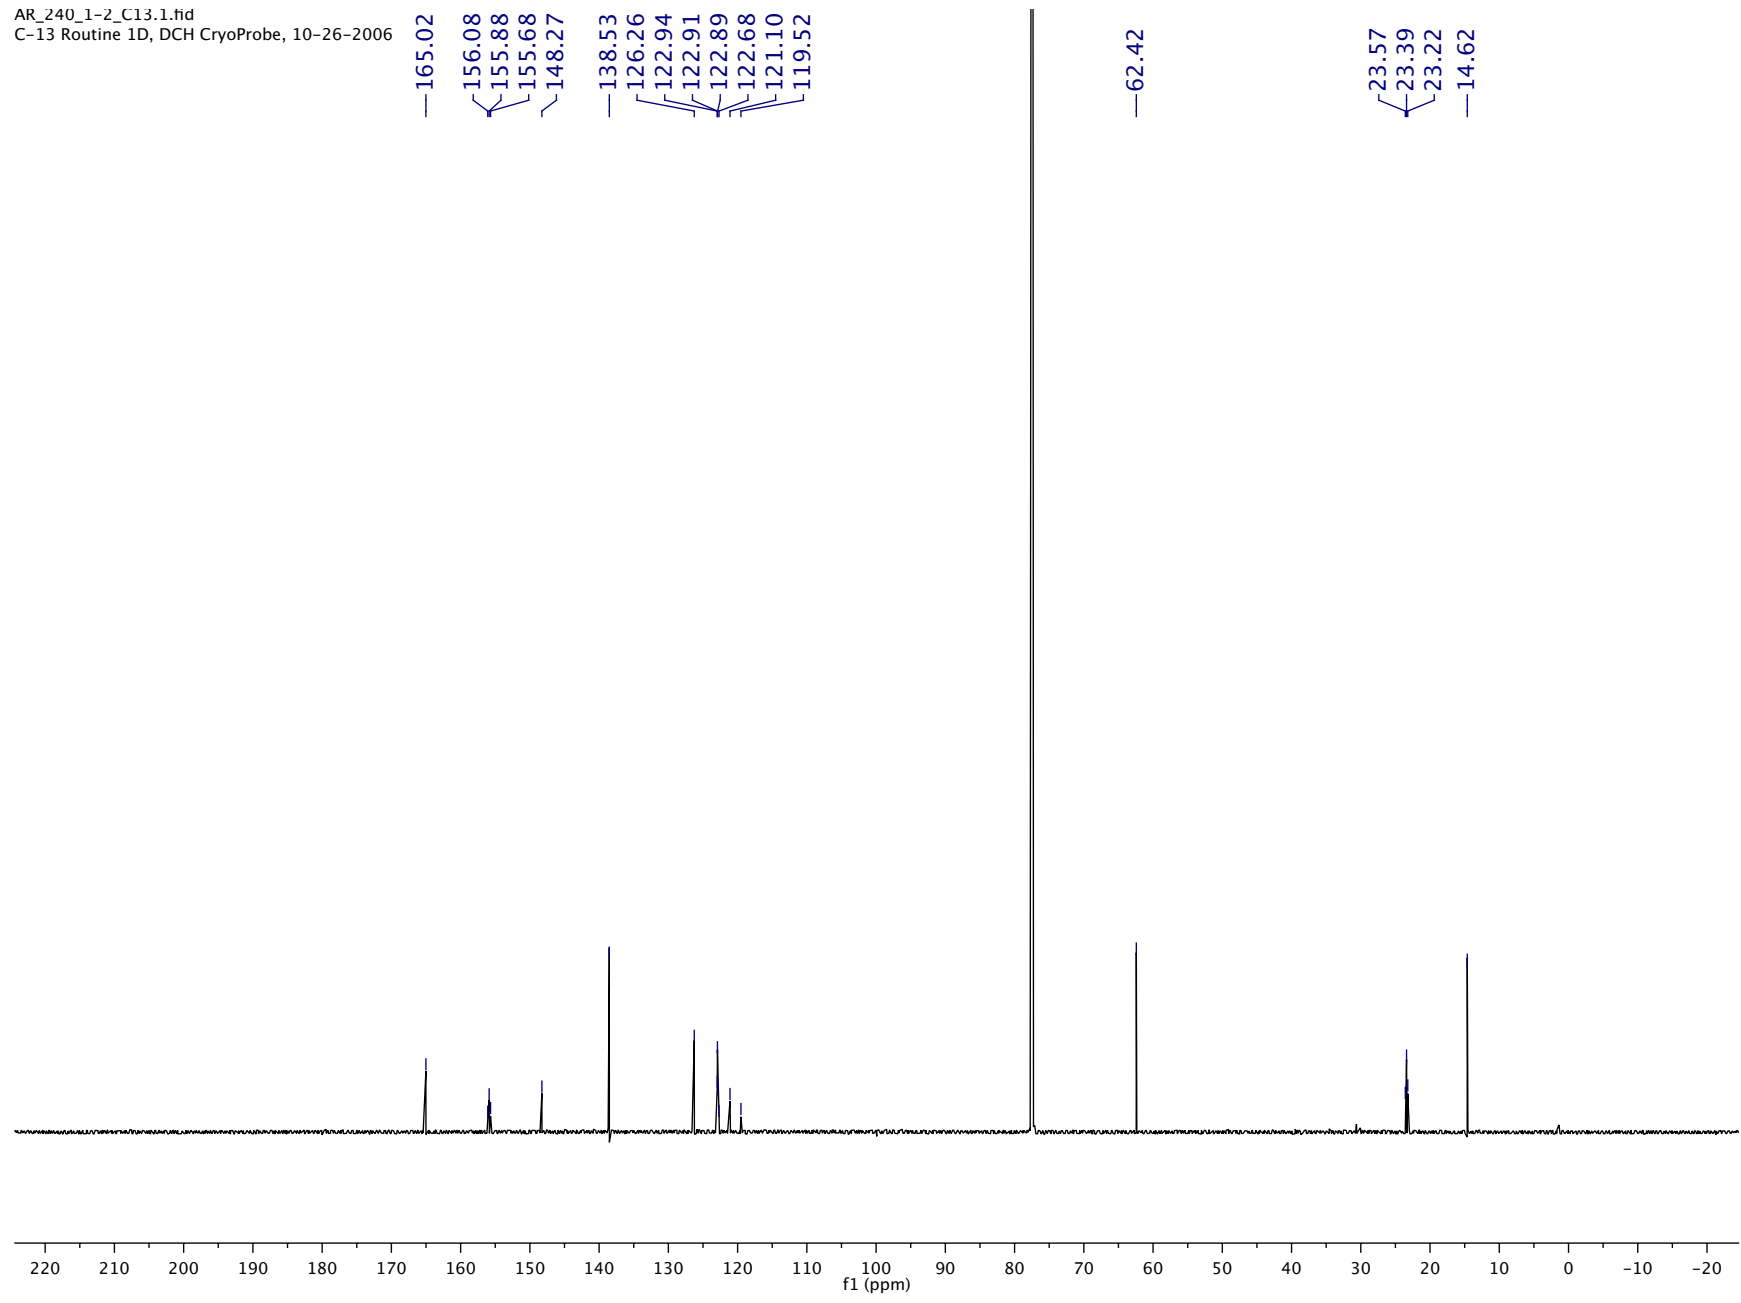

SI-67

AR-240-1-2-F.555.fid  
F-19, CDCl<sub>3</sub>, DPX-400 QNP Probe. CF<sub>3</sub>Cl as Ref at 0 ppm.

---90.09

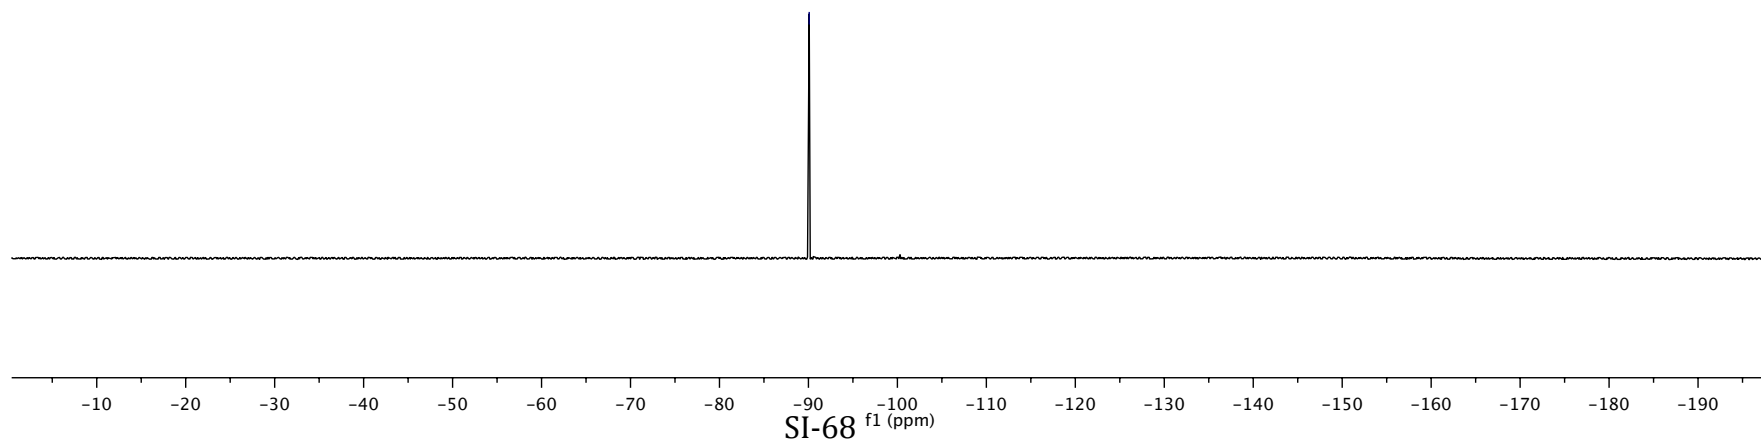

Aler\_228\_2.2\_01  
Std proton

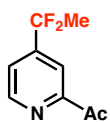

17-C4

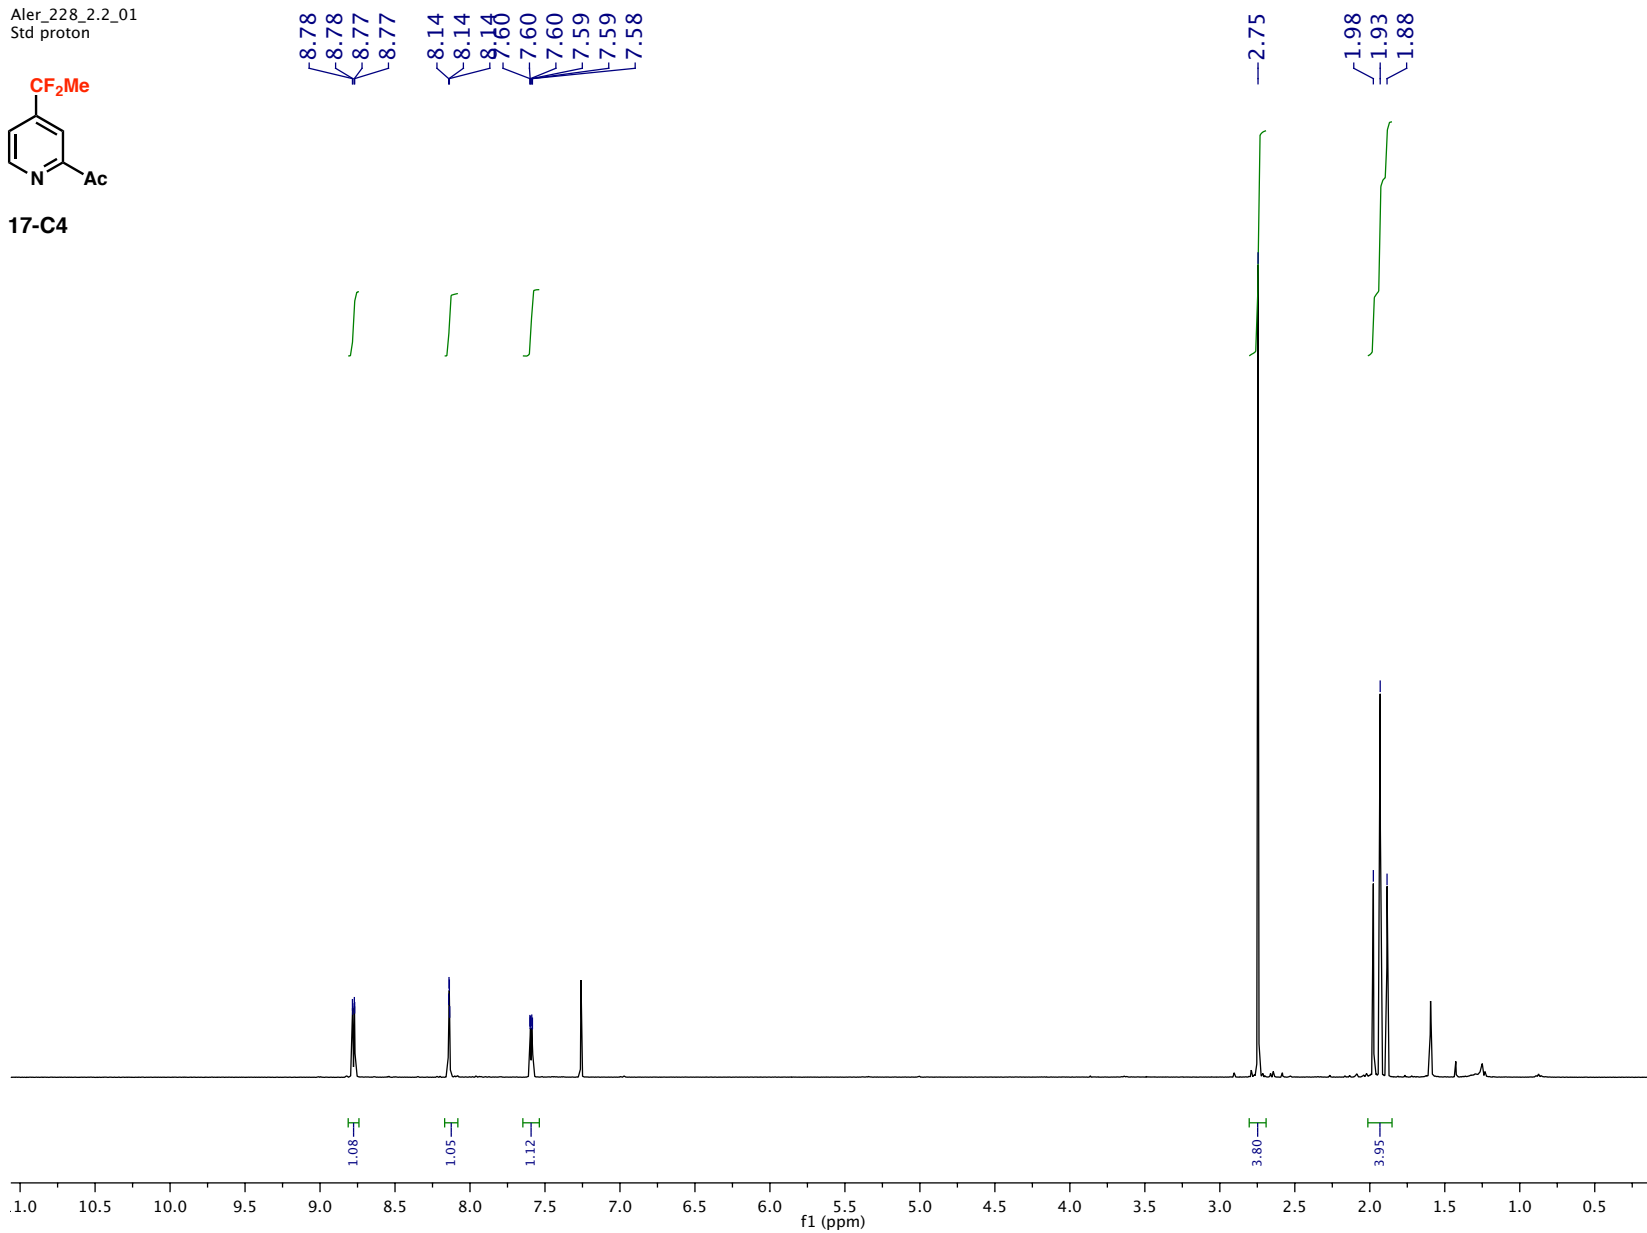

aler-228-2.2-13C.1.fid  
C-13 Routine 1D, DC, CryoProbe, 10-26-2006

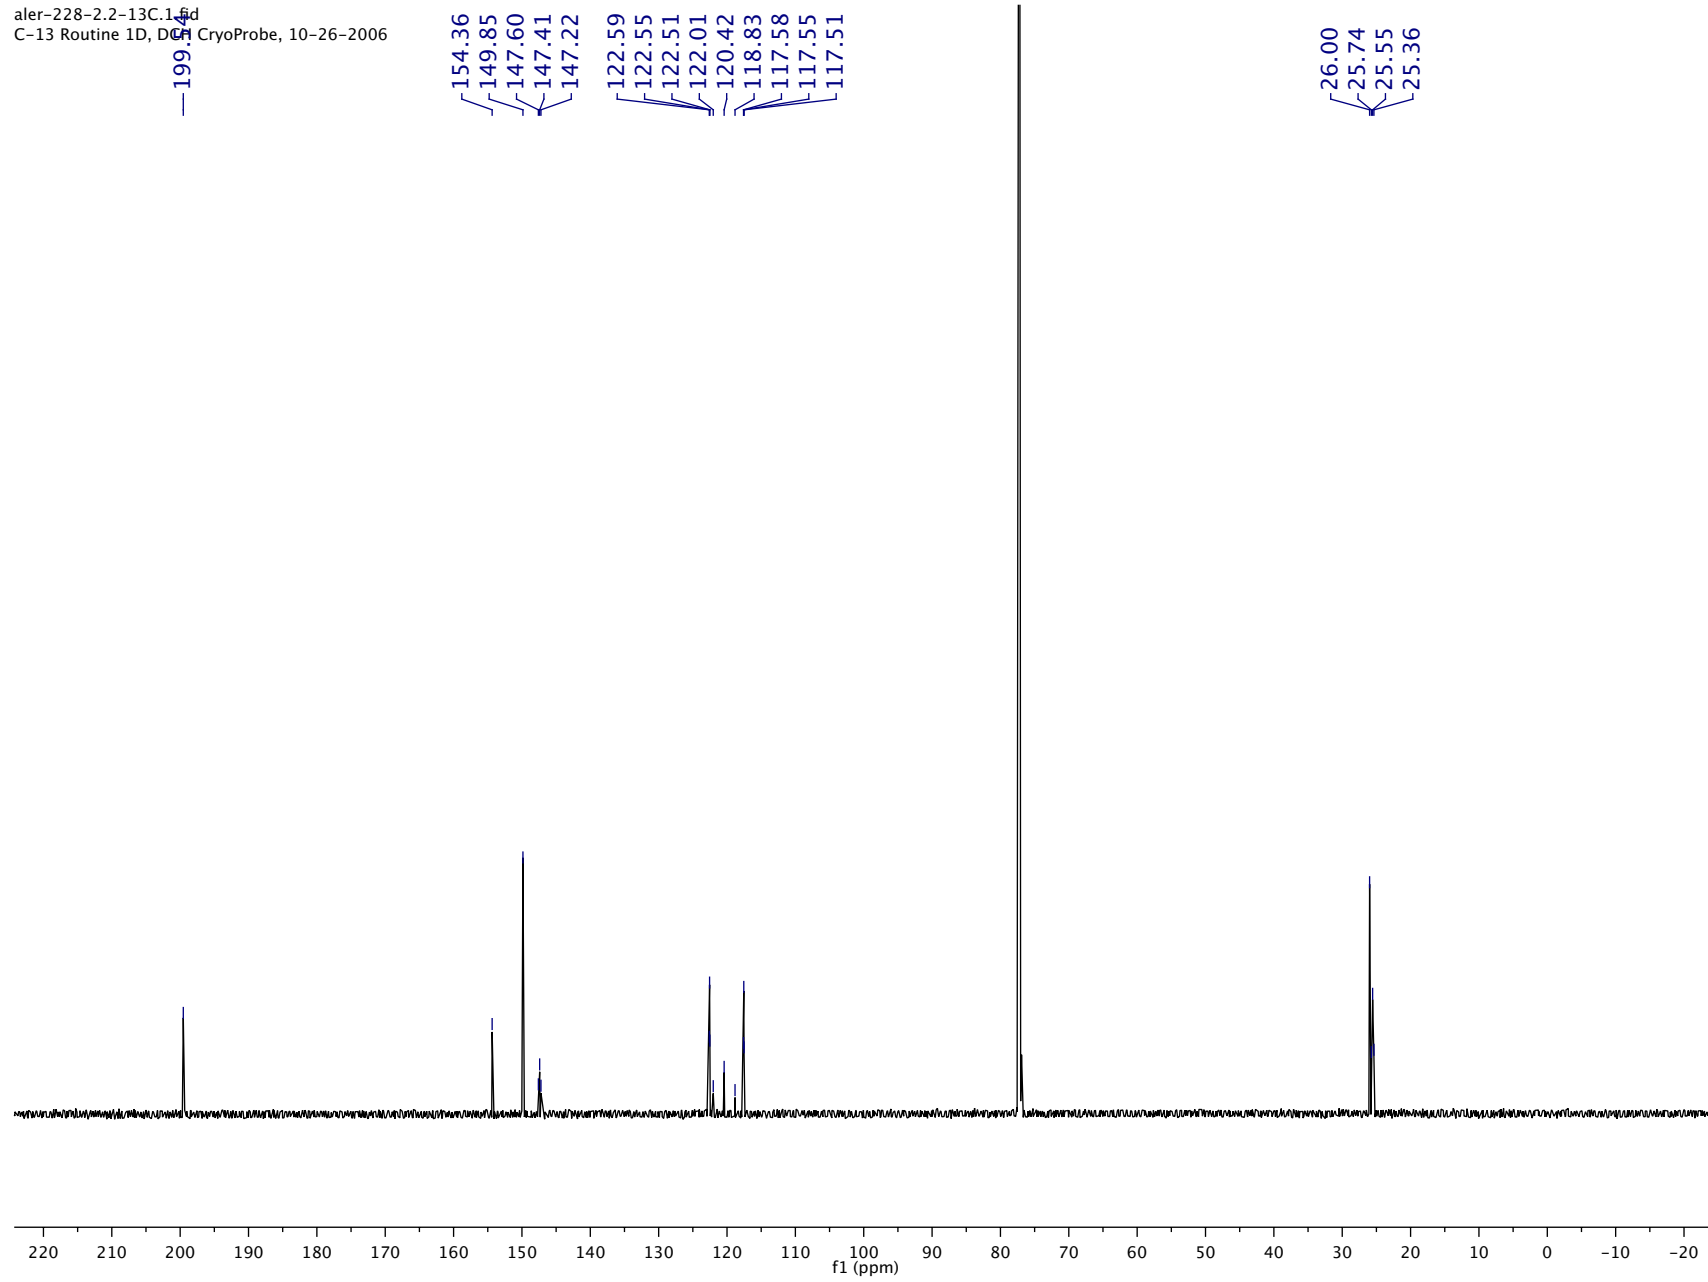

SI-70

Aler\_228\_2Fmw.1.fid  
F-19, CDCl<sub>3</sub>, DPX-400 QNP Probe. CF<sub>3</sub>Cl as Ref at 0 ppm.

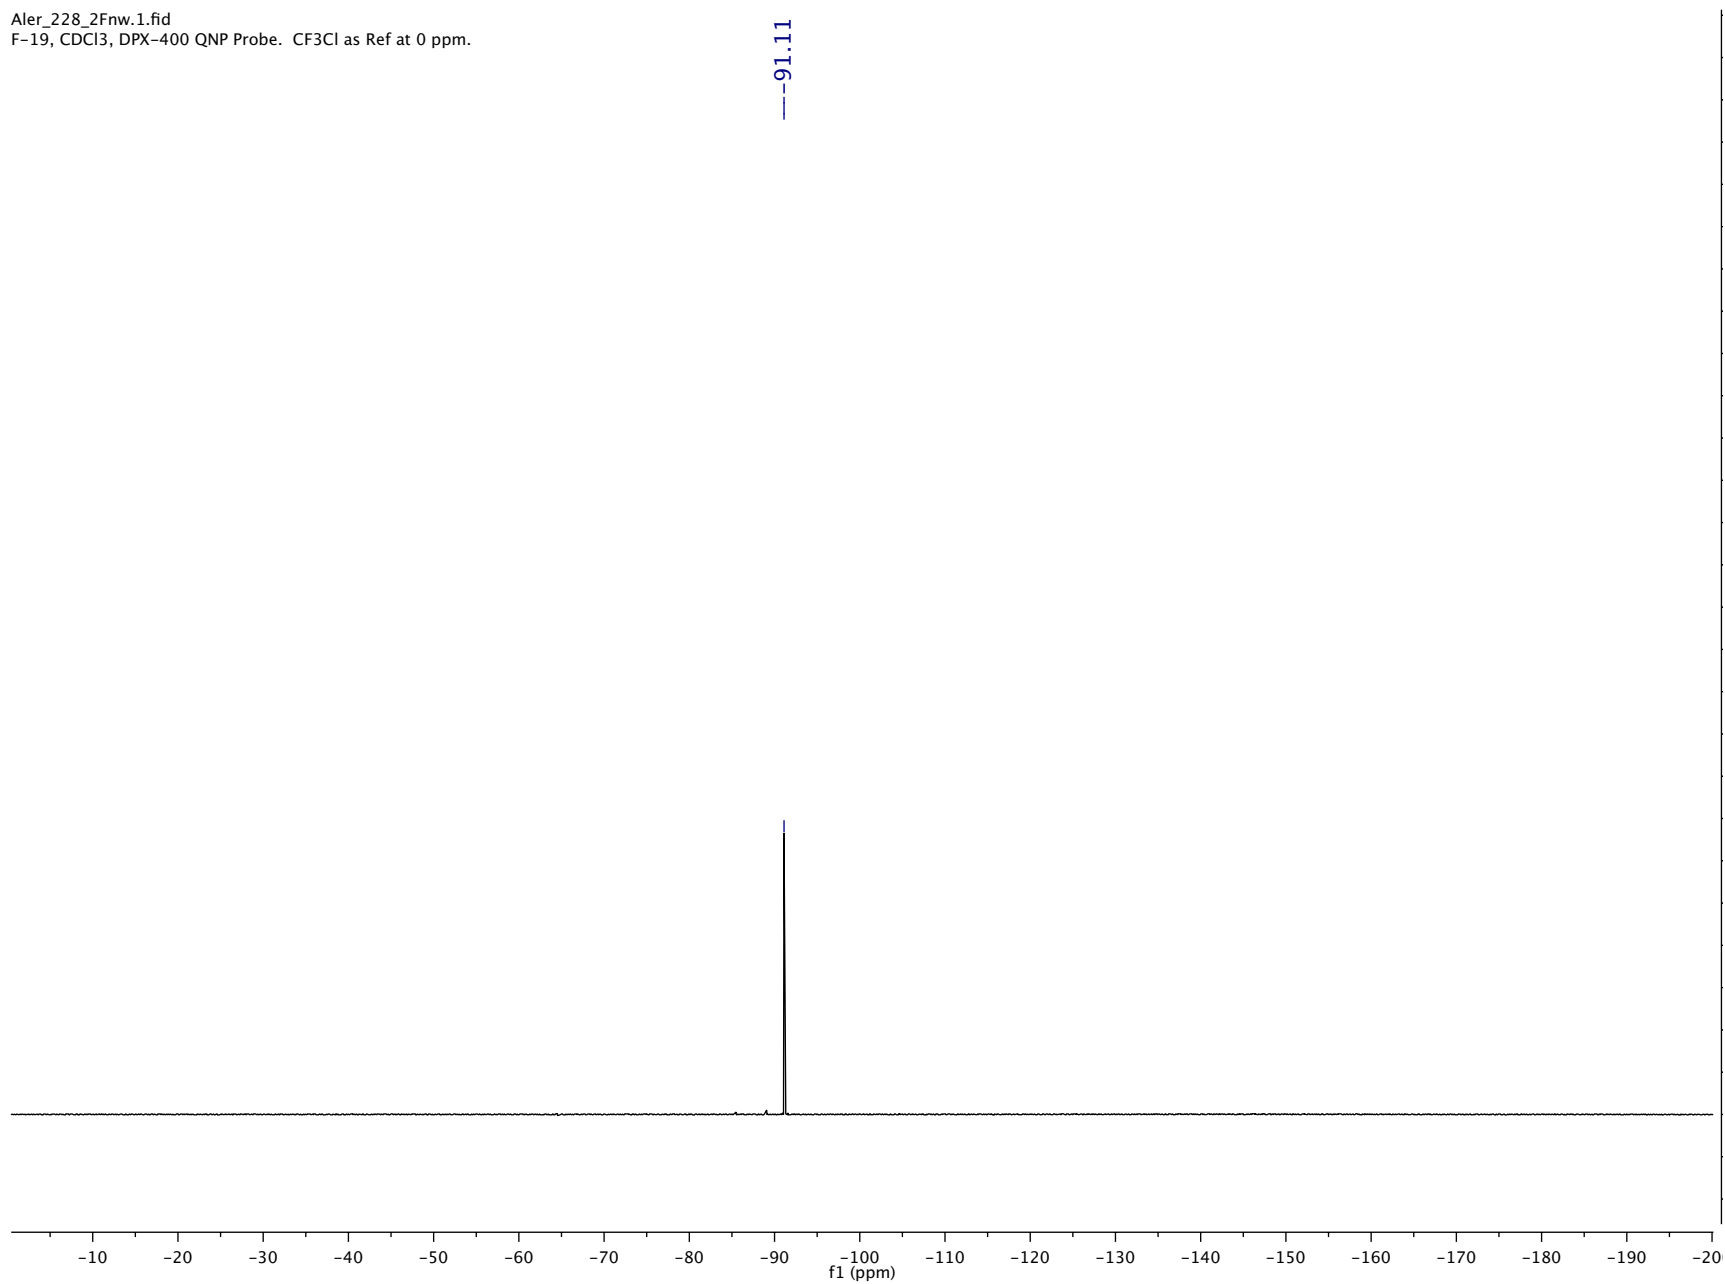

SI-71

AR\_228\_1\_2\_H1.1.fid  
H-1 Routine 1D, DCH CryoProbe, 1-13-20

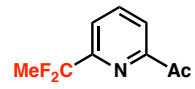

17-C6

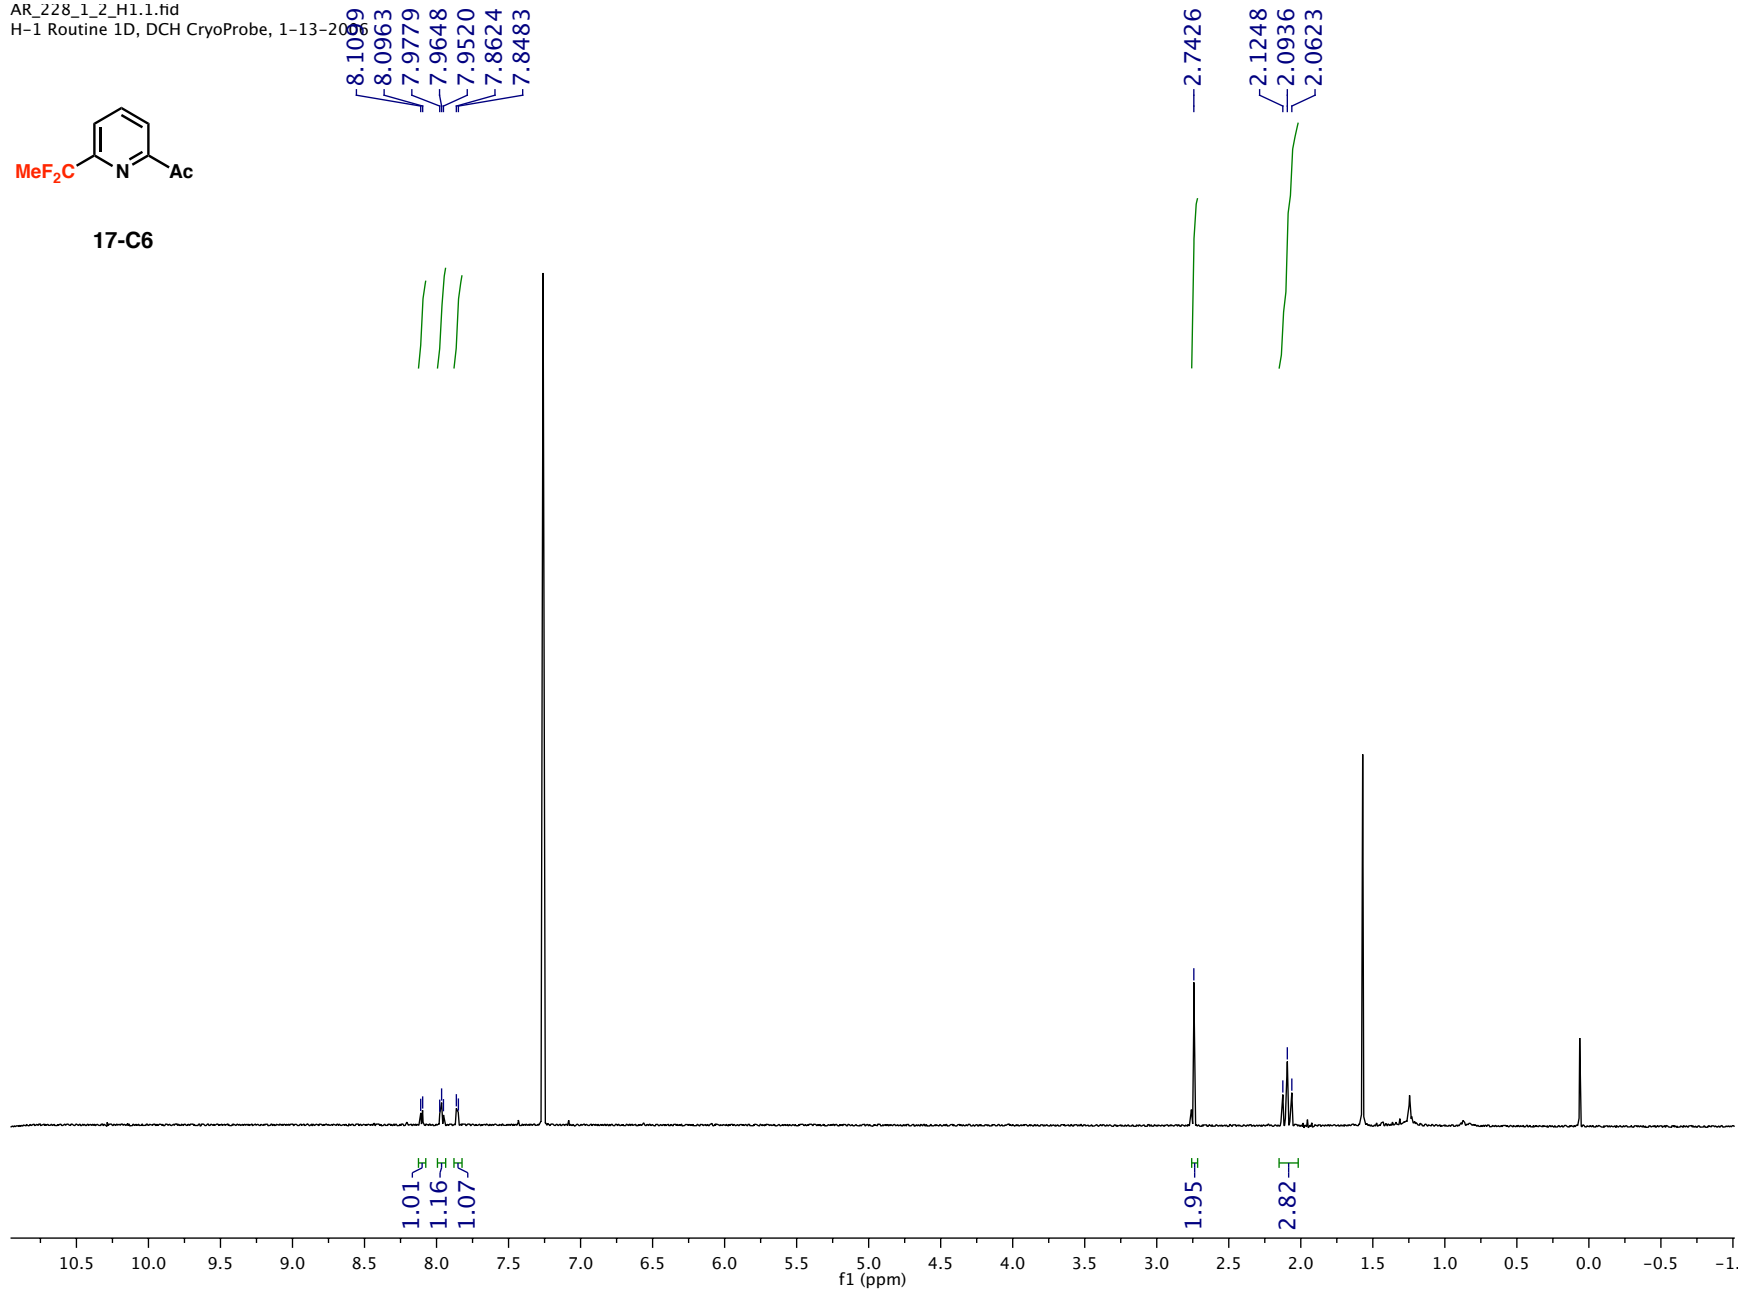

SI-72



AR-228-mixC.1.fid  
C-13 Routine 1D, D CryoProbe, 10-26-2006

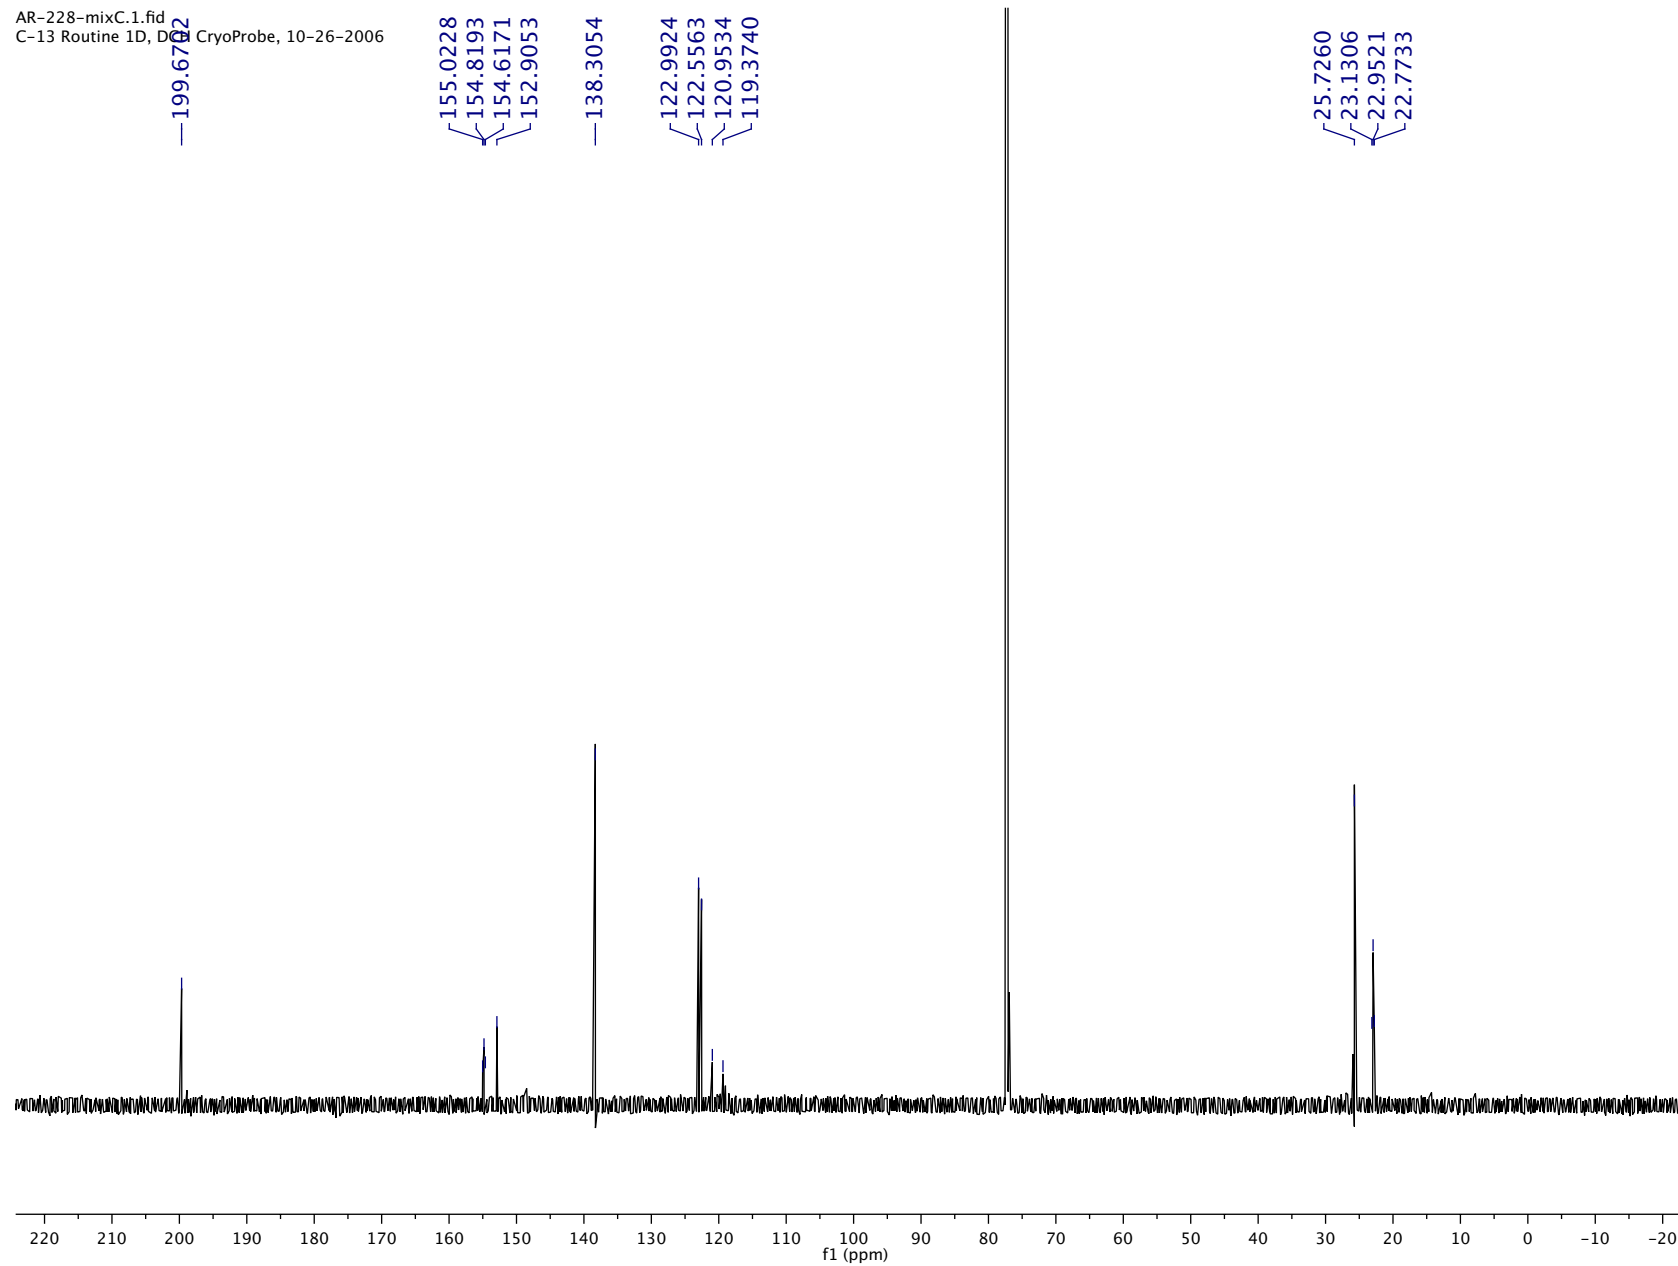

SI-73

F-19, CDCl3, DPX-400 QNP Probe. CF3Cl as Ref at 0 ppm.

50.06

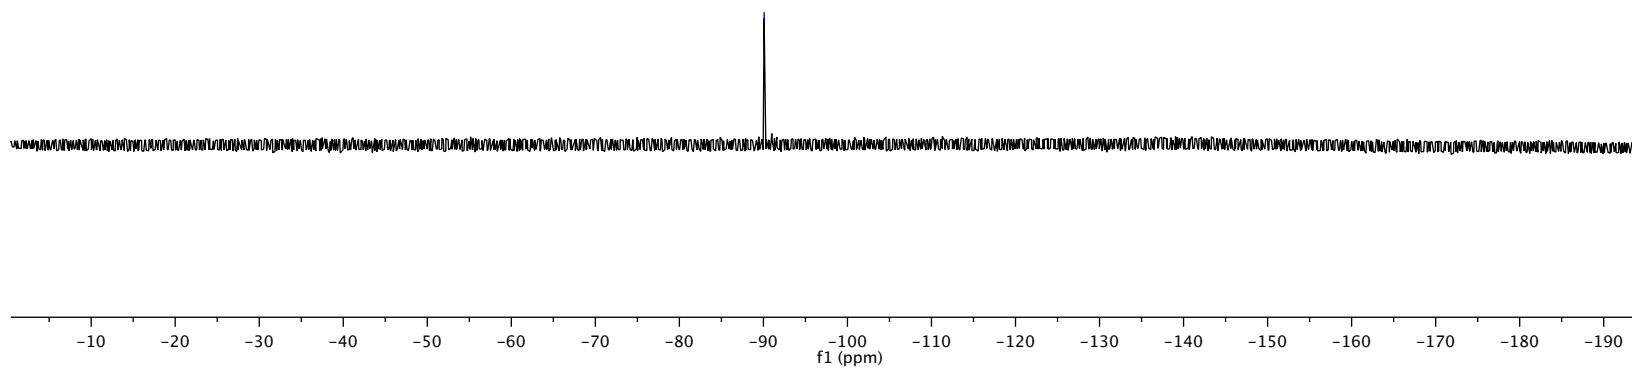

SI-74

Aler\_230\_1CO\_01  
Std proton

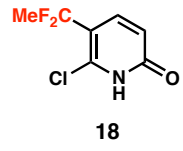

7.79  
7.79  
7.79  
7.77  
7.77  
7.77

6.66  
6.64

2.11  
2.06  
2.01

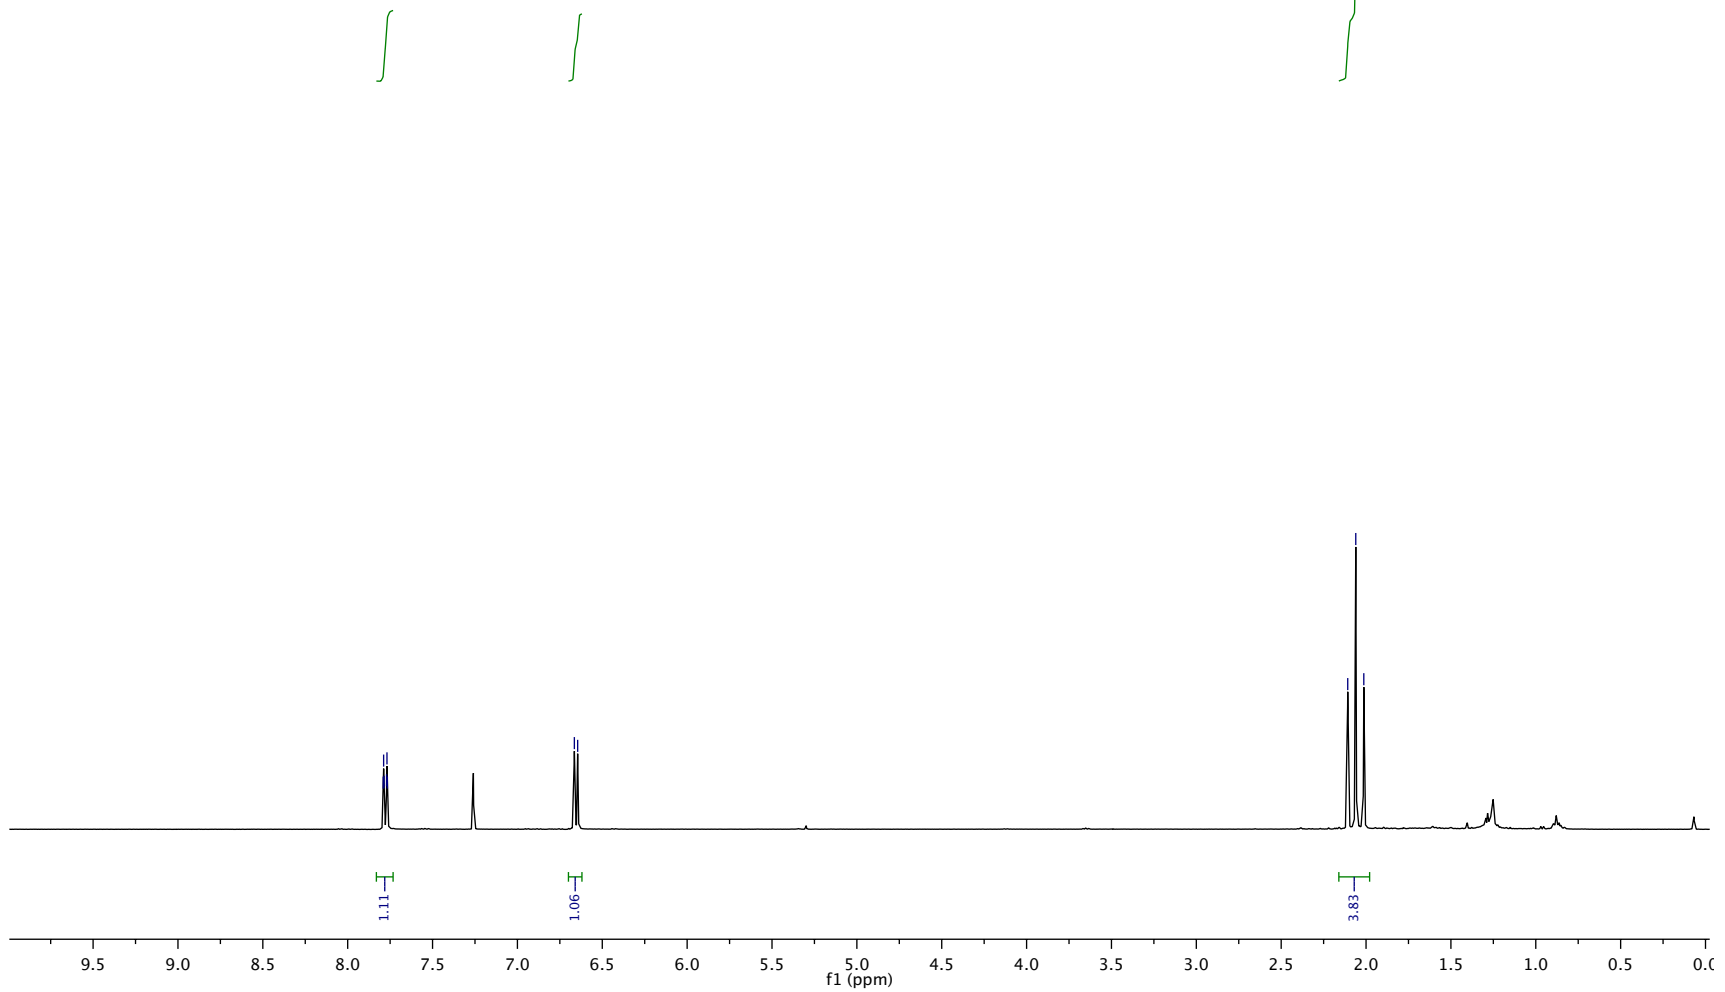

aler-230-CO-13C.1.fid  
C-13 Routine 1D, DC CryoProbe, 10-26-2006

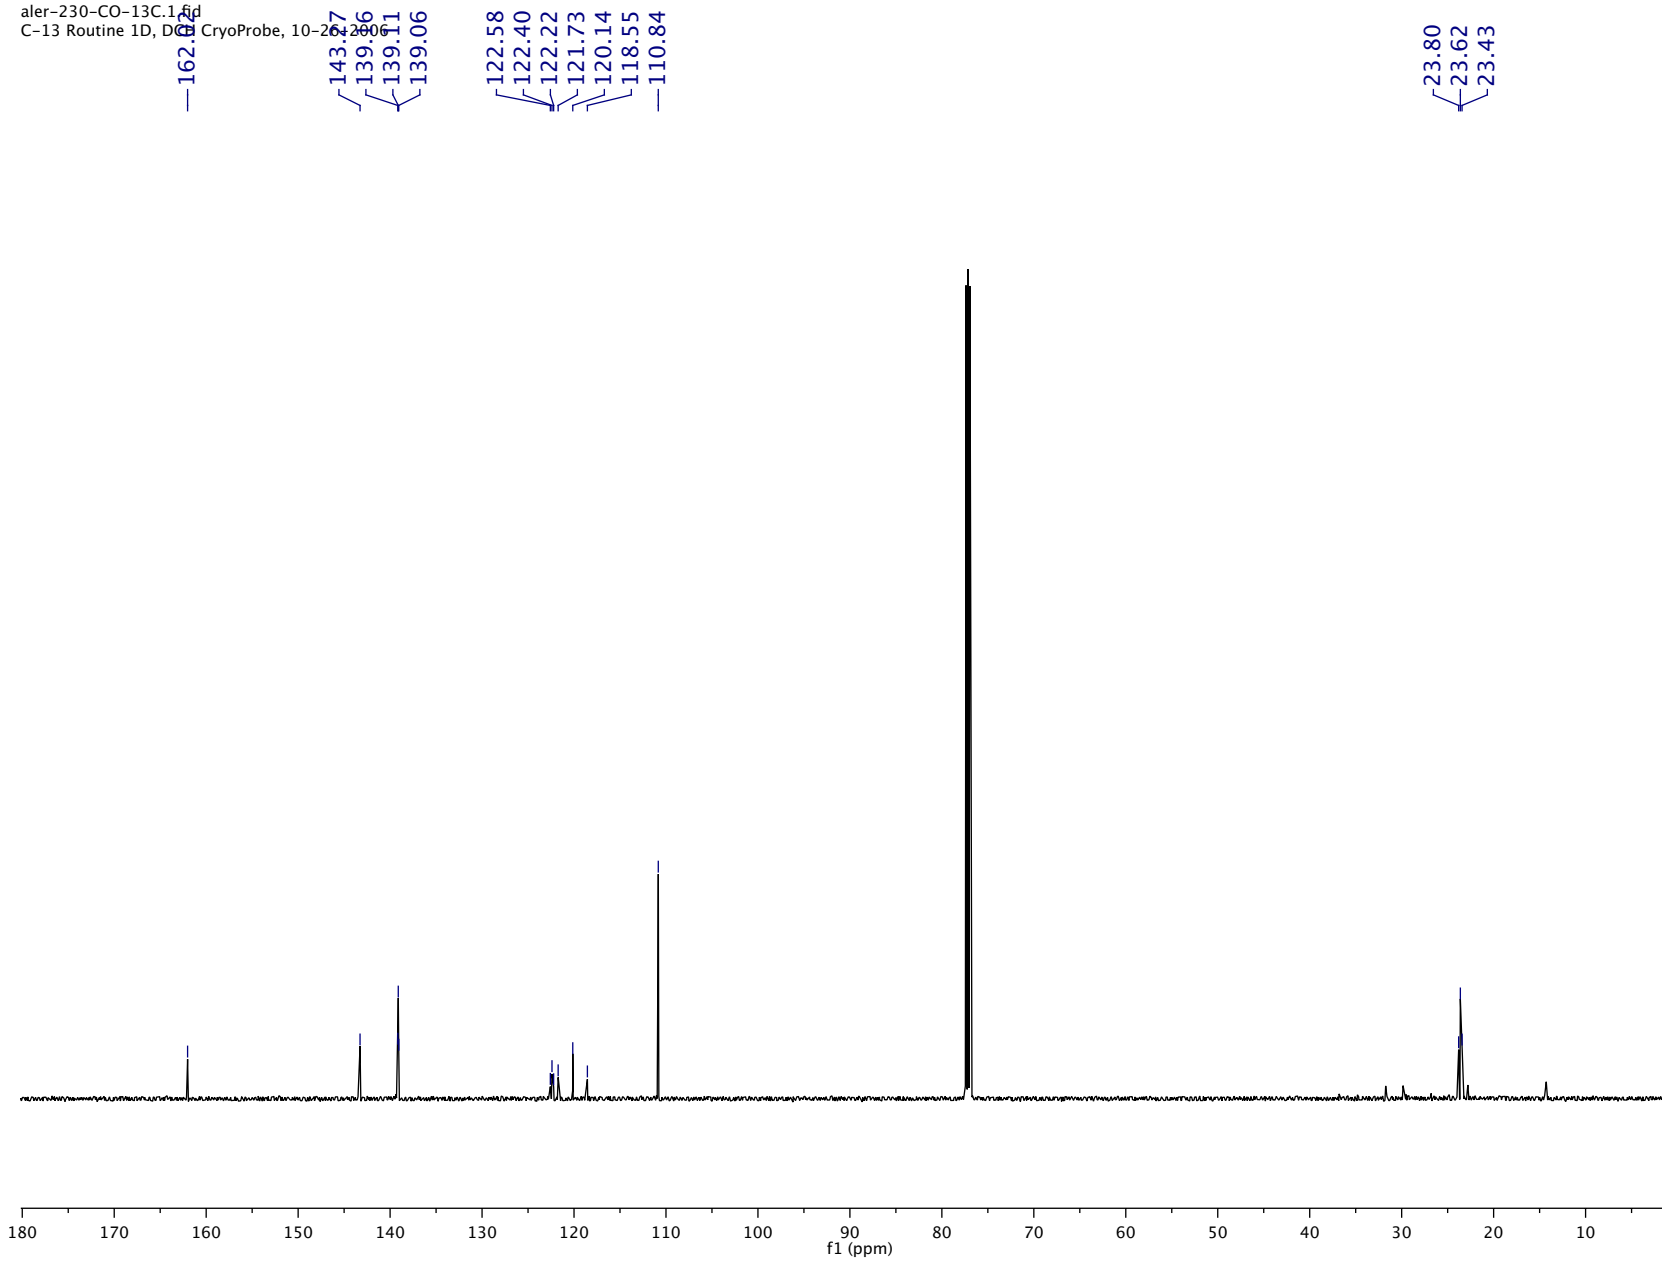

SI-76

Aler\_230\_F.1.fid  
F-19, CDCl3, DPX-400 QNP Probe. CF3Cl as Ref at 0 ppm.

---89.30

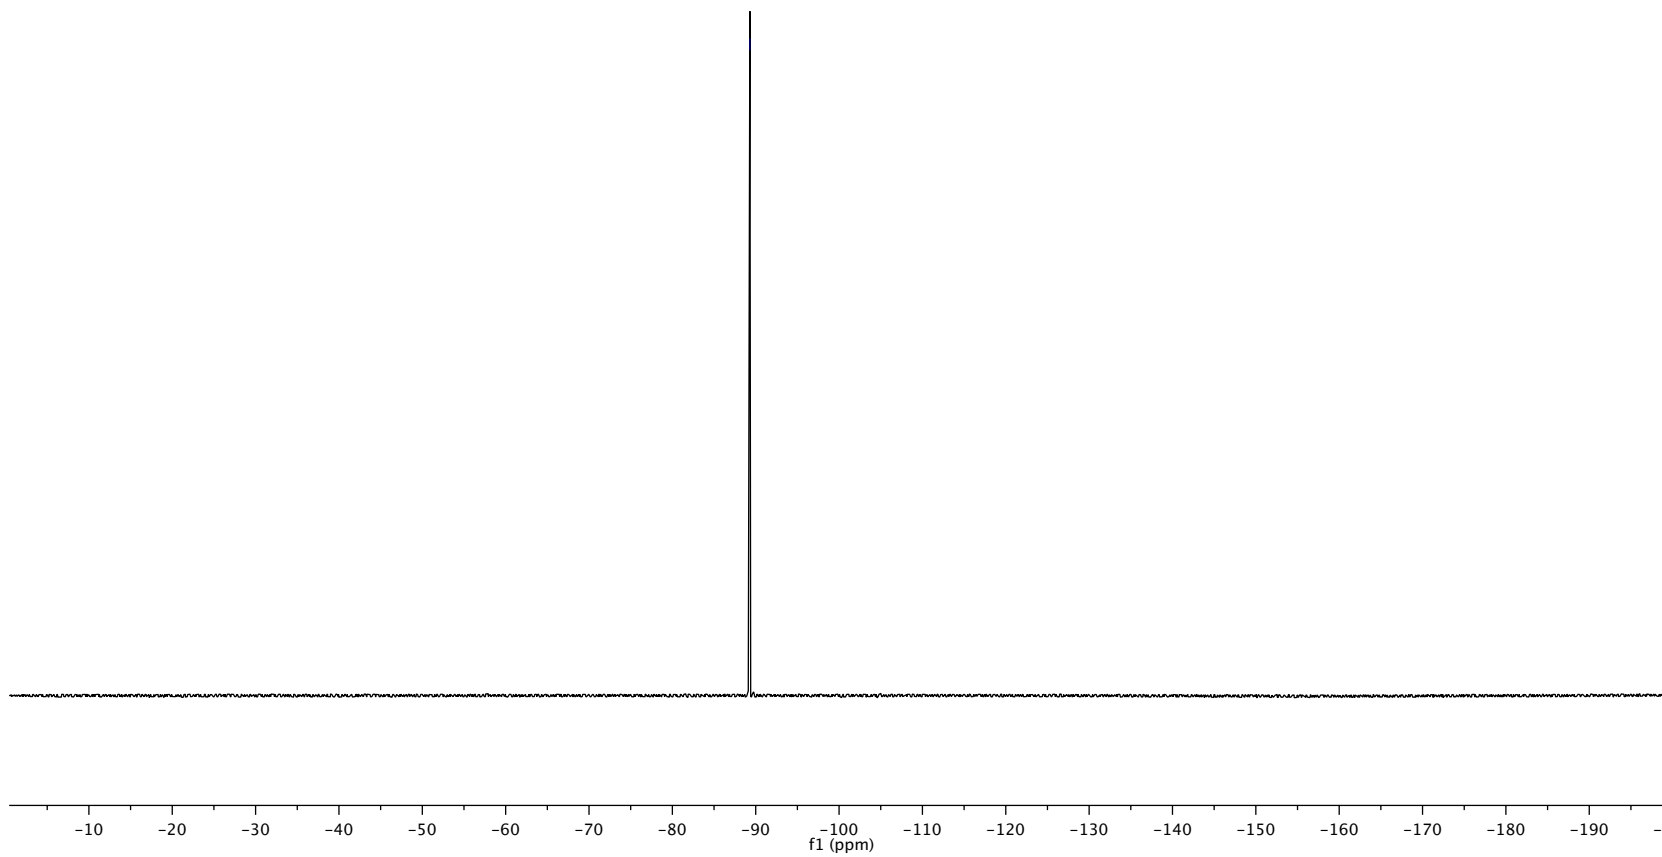

SI-77

3-71-pyrazine-second-check-H/1

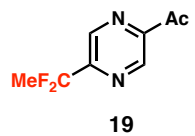

9.211  
9.213  
9.211  
8.978  
8.975

2.105  
2.058  
2.011

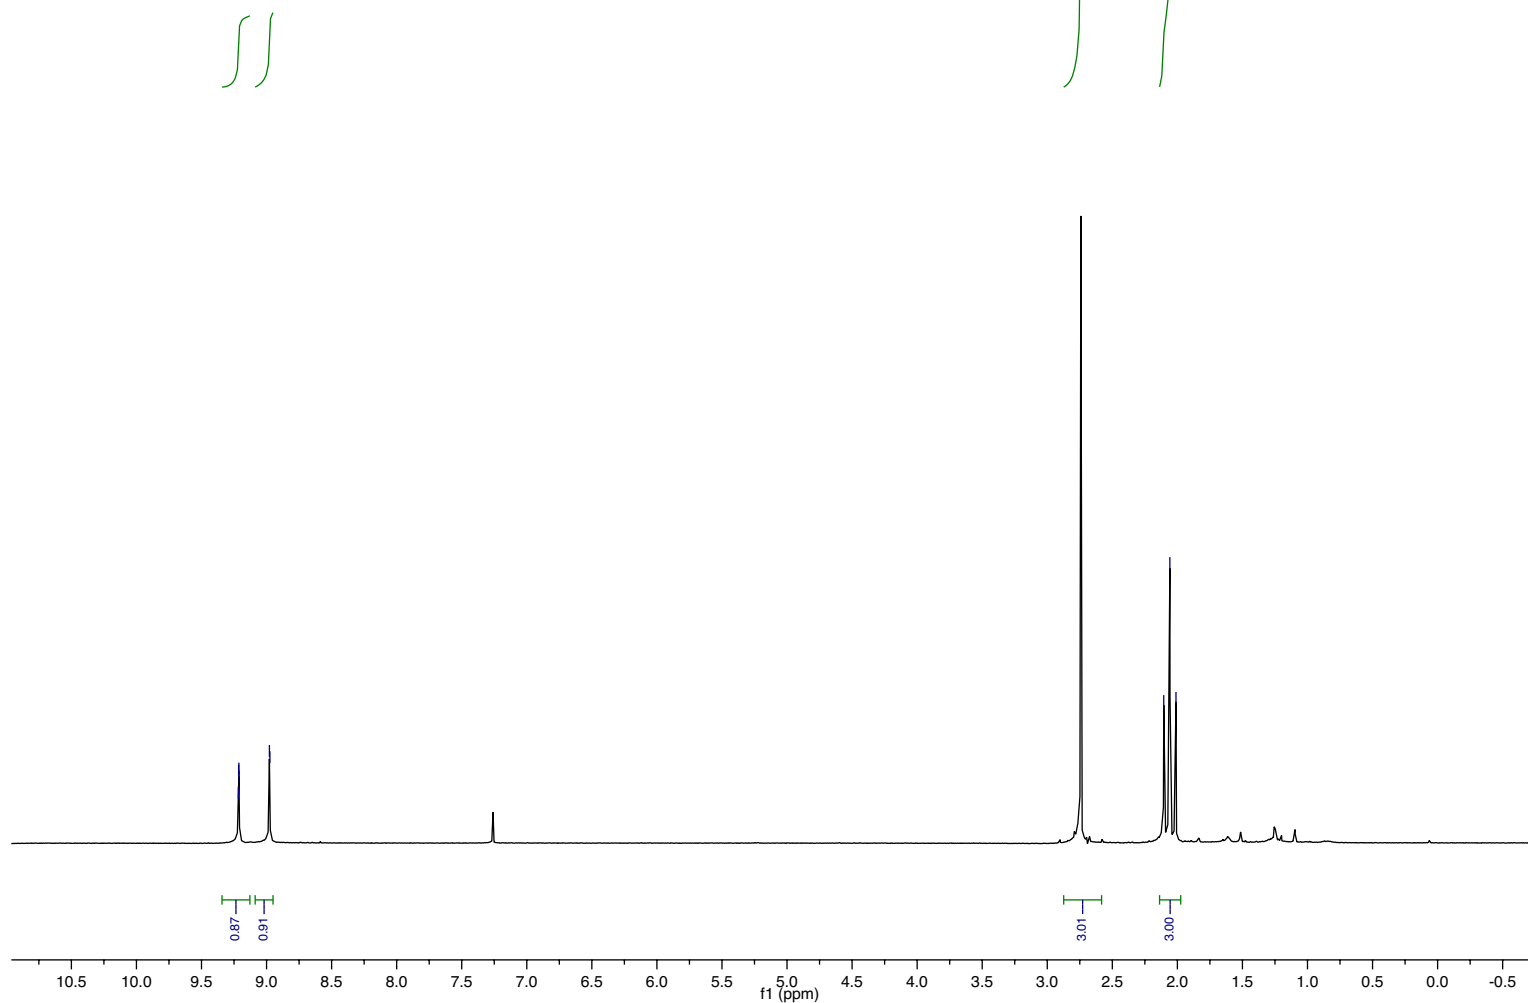

SI-78

3-71-pyrazine-second-13C/1  
C-13 Routine 1D, DCHCl<sub>3</sub> CryoProbe 101-26-2006

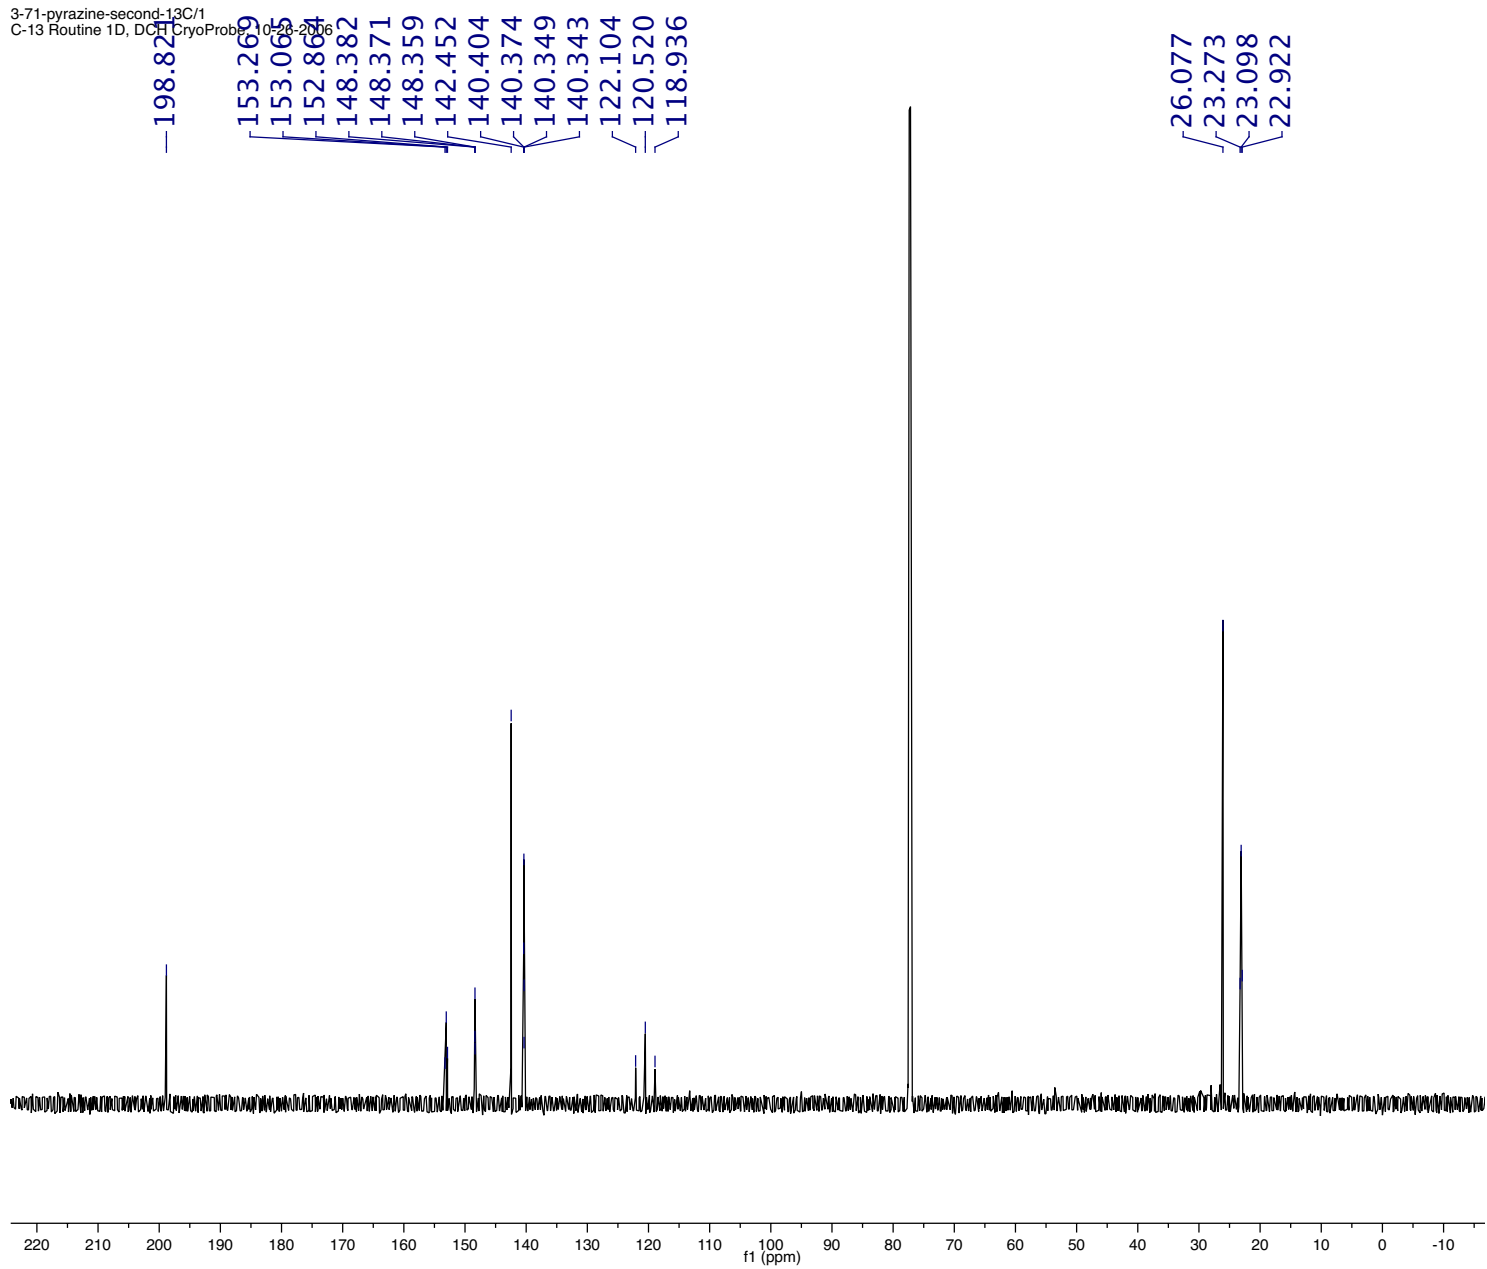

3-71-3-acylazine-TsOH-crude-F/1  
F-19, CDCl<sub>3</sub>, DPX-400 QNP Probe. CF<sub>3</sub>Cl as Ref at 0 ppm.

---91.712

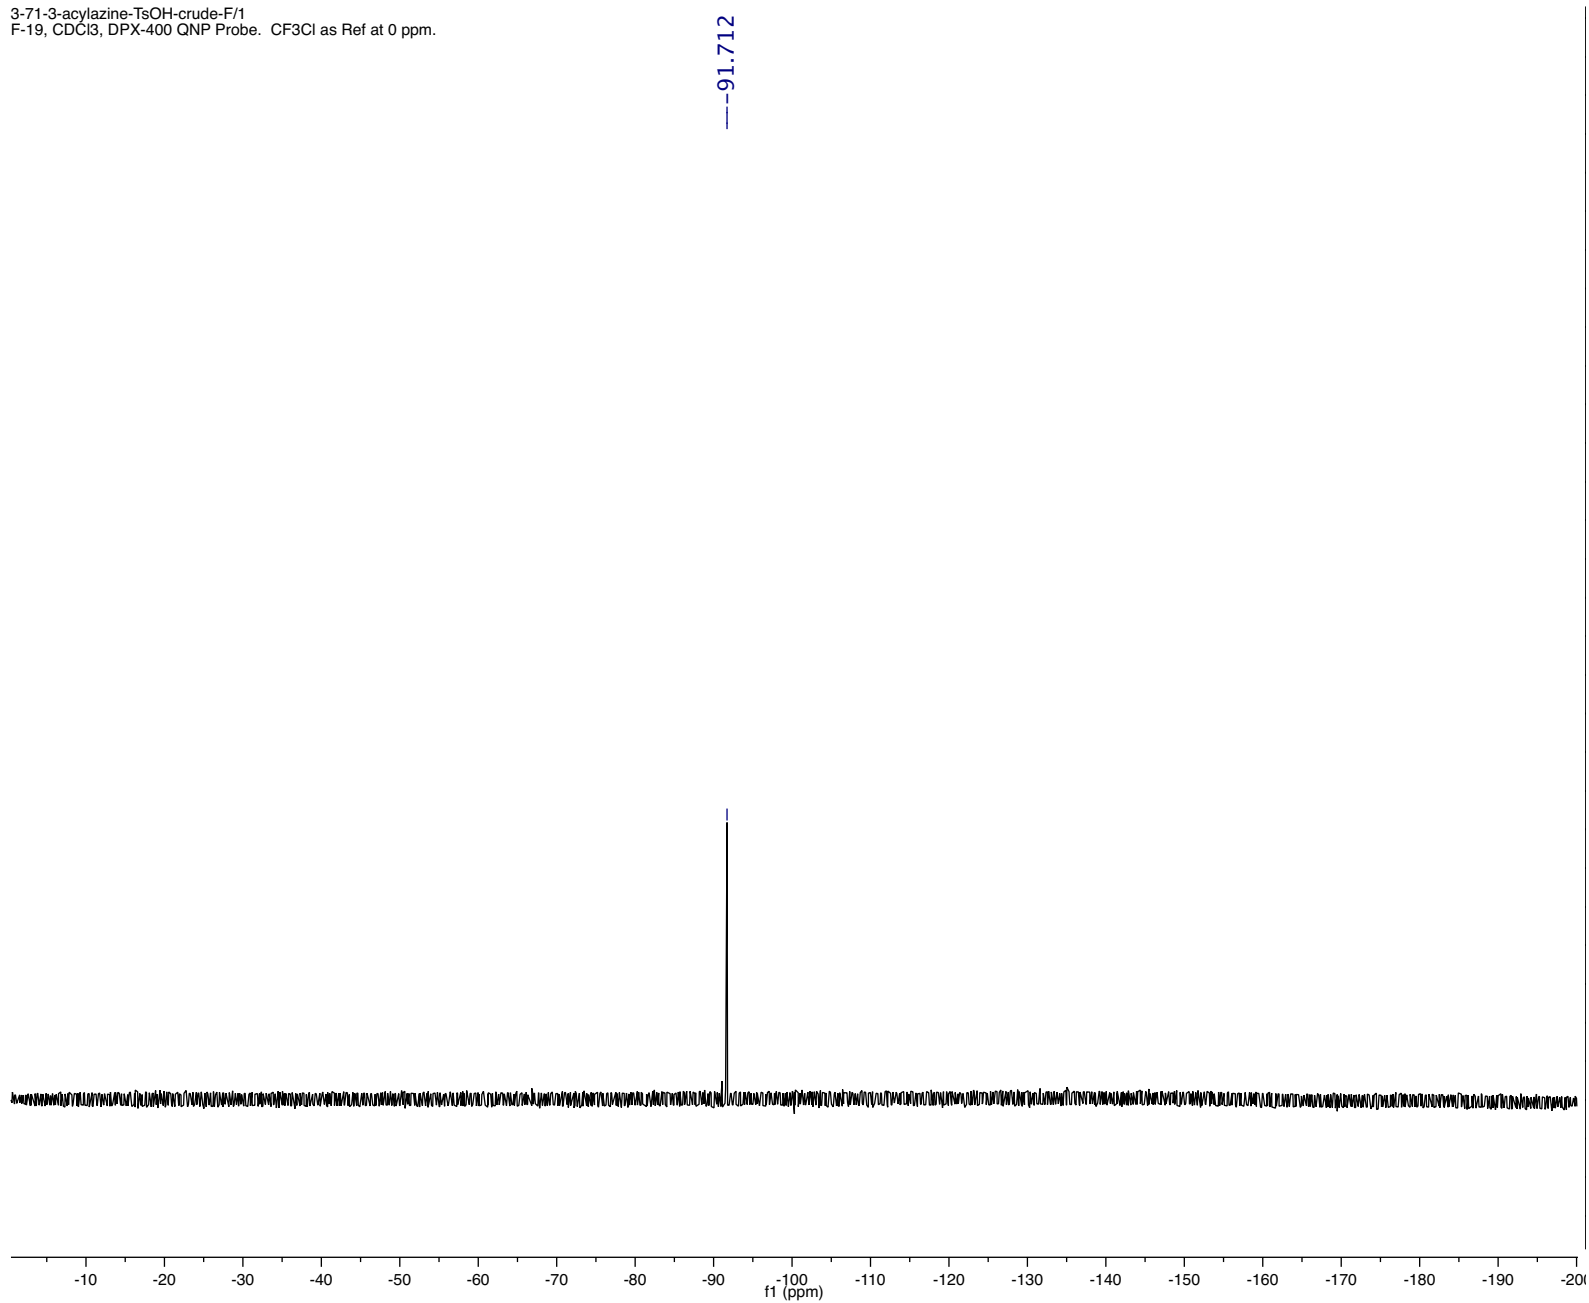

SI-80



Aler\_232\_1.1.fid  
H-1 Routine 1D experiment. 800 MHz, 9-13-2007

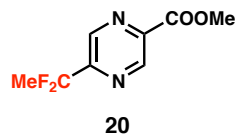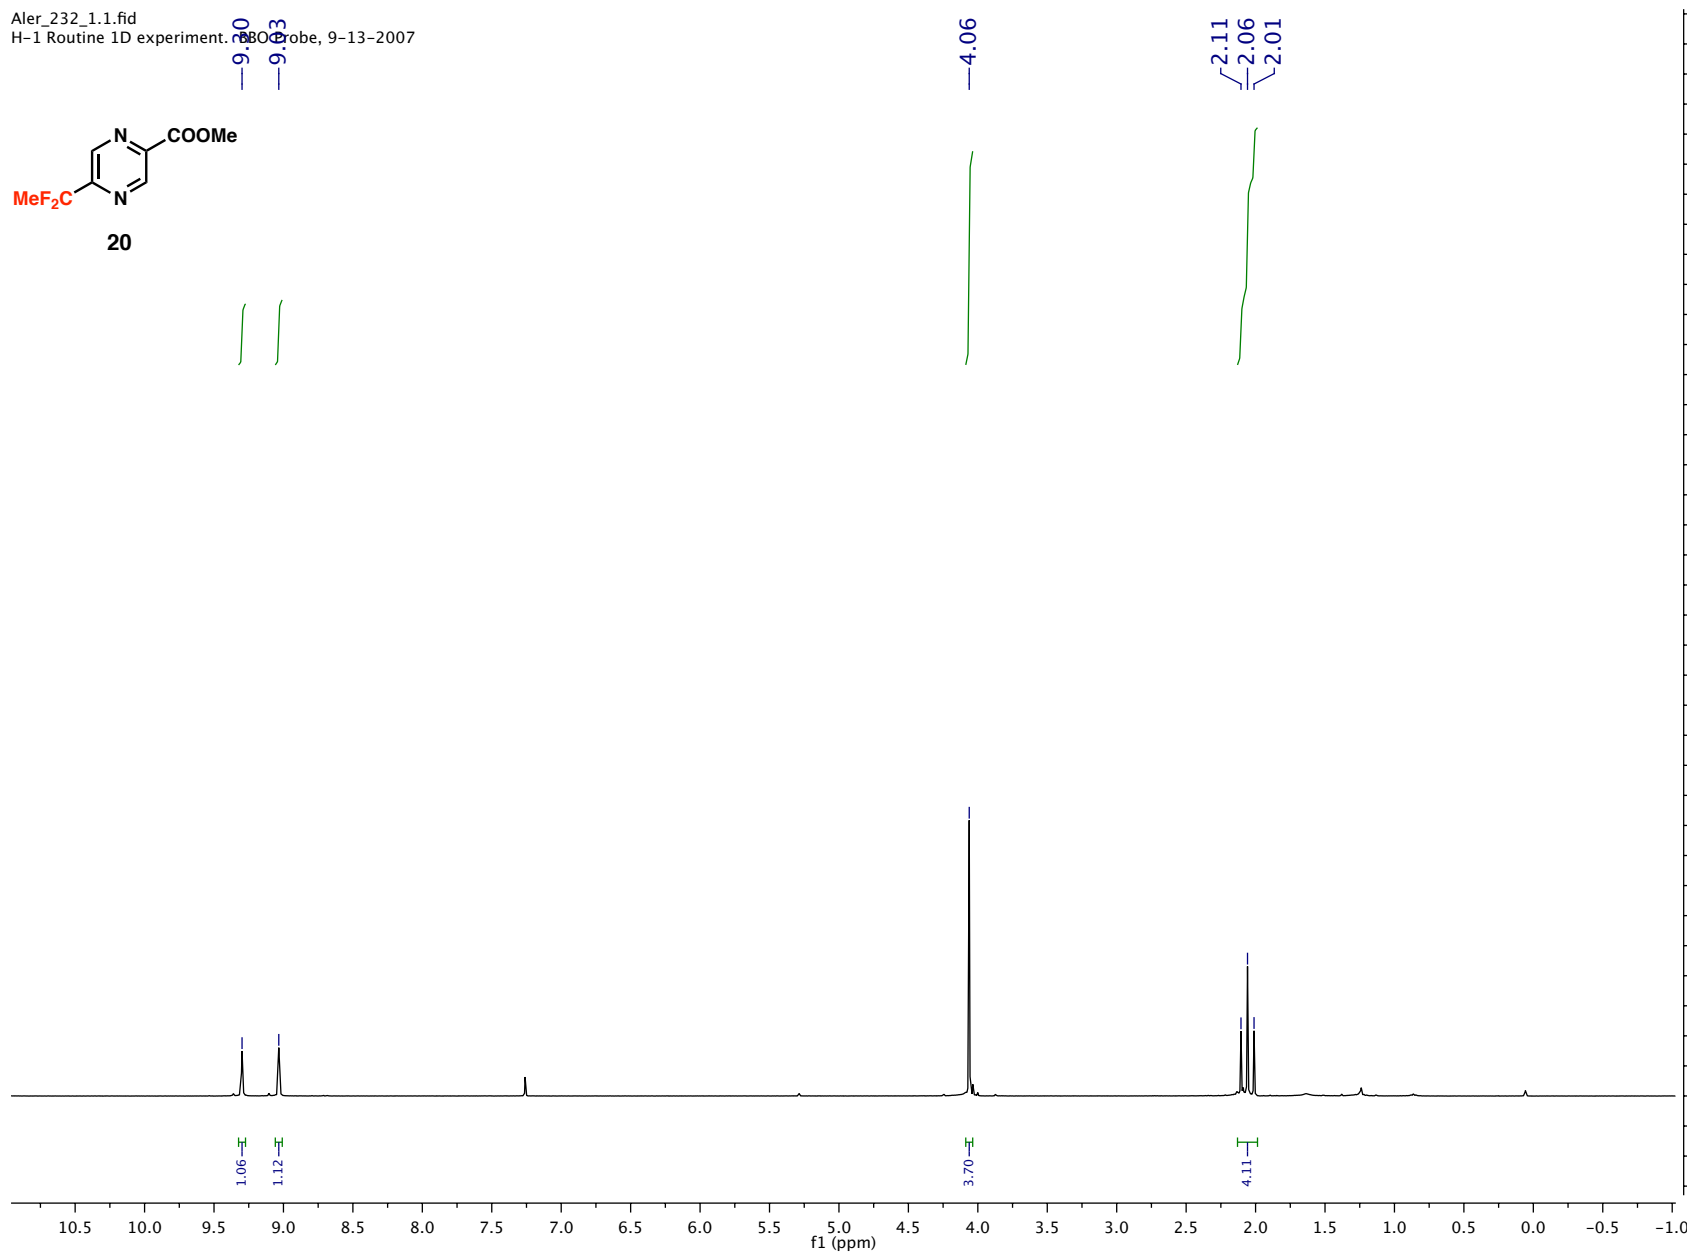

Aler\_232\_C13.1.fid  
C-13 Routine 1D, DCH CryoProbe, 10-26-2006

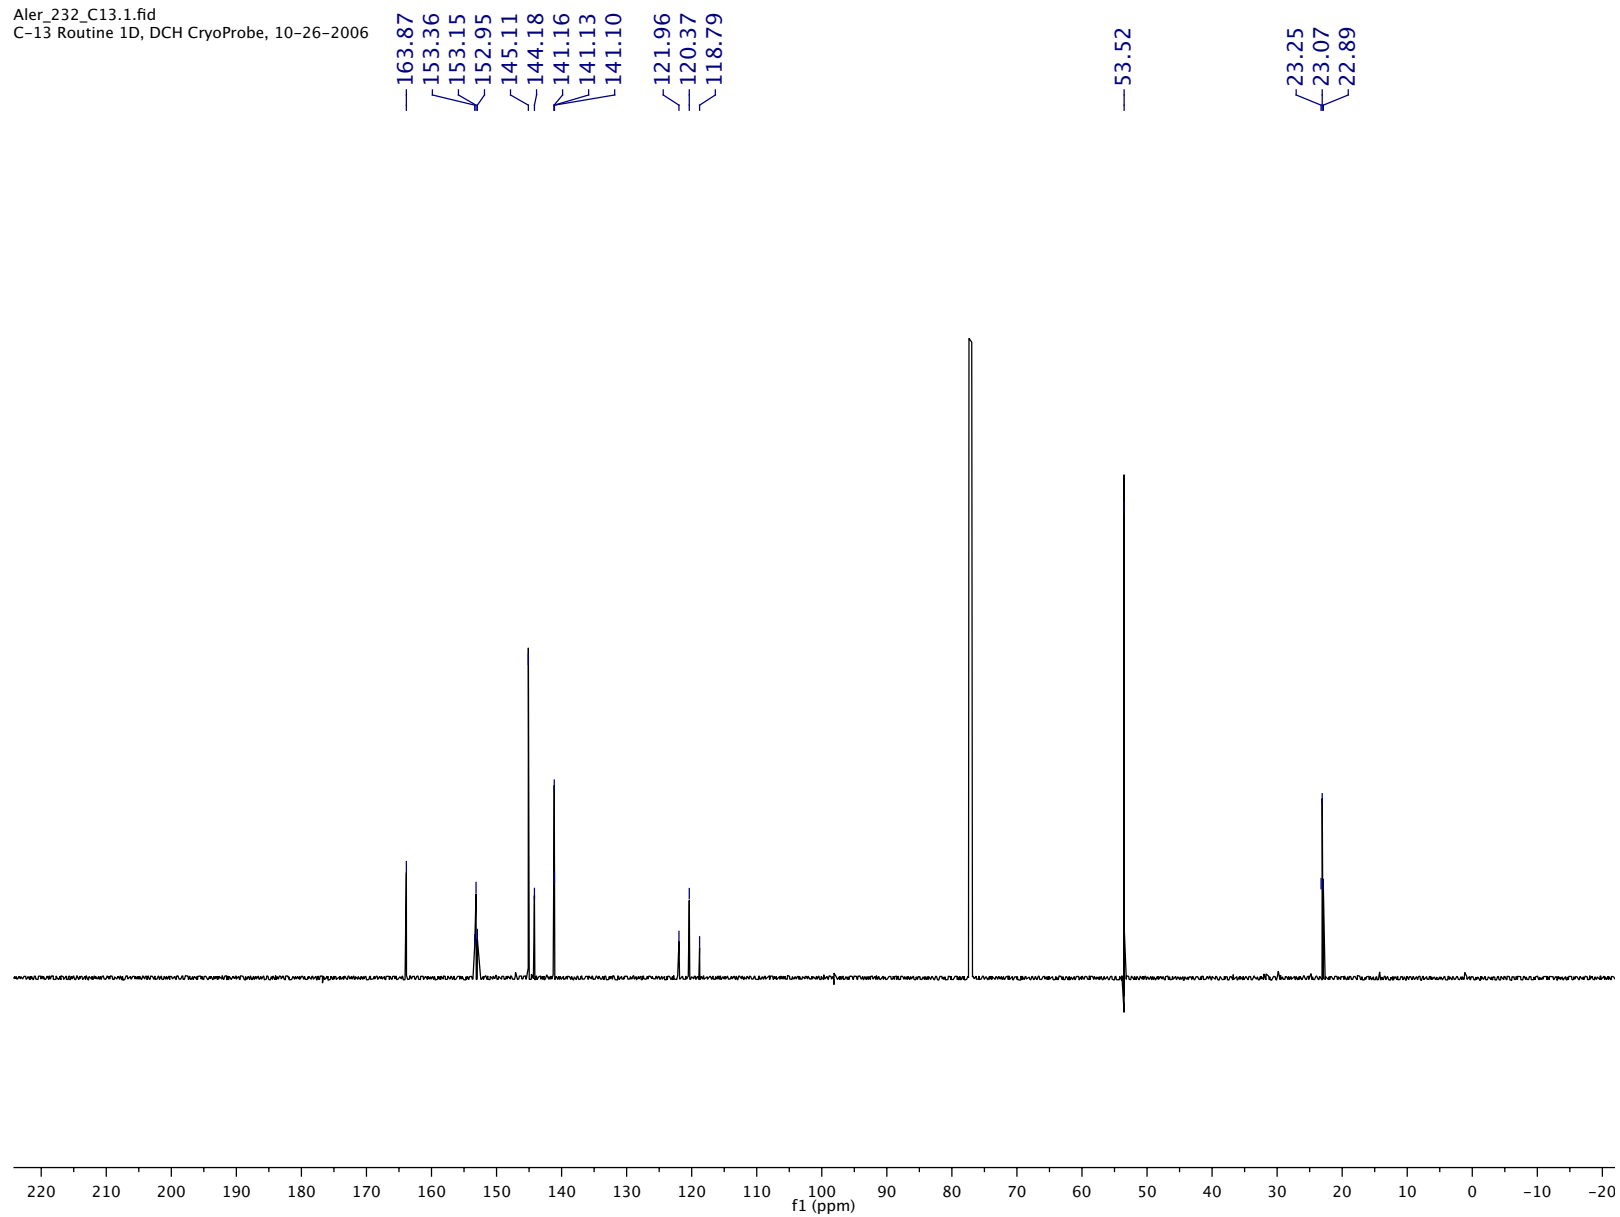

Aler\_232\_1\_F.1.fid  
F-19, CDCl<sub>3</sub>, DPX-400 QNP Probe. CF<sub>3</sub>Cl as Ref at 0 ppm.

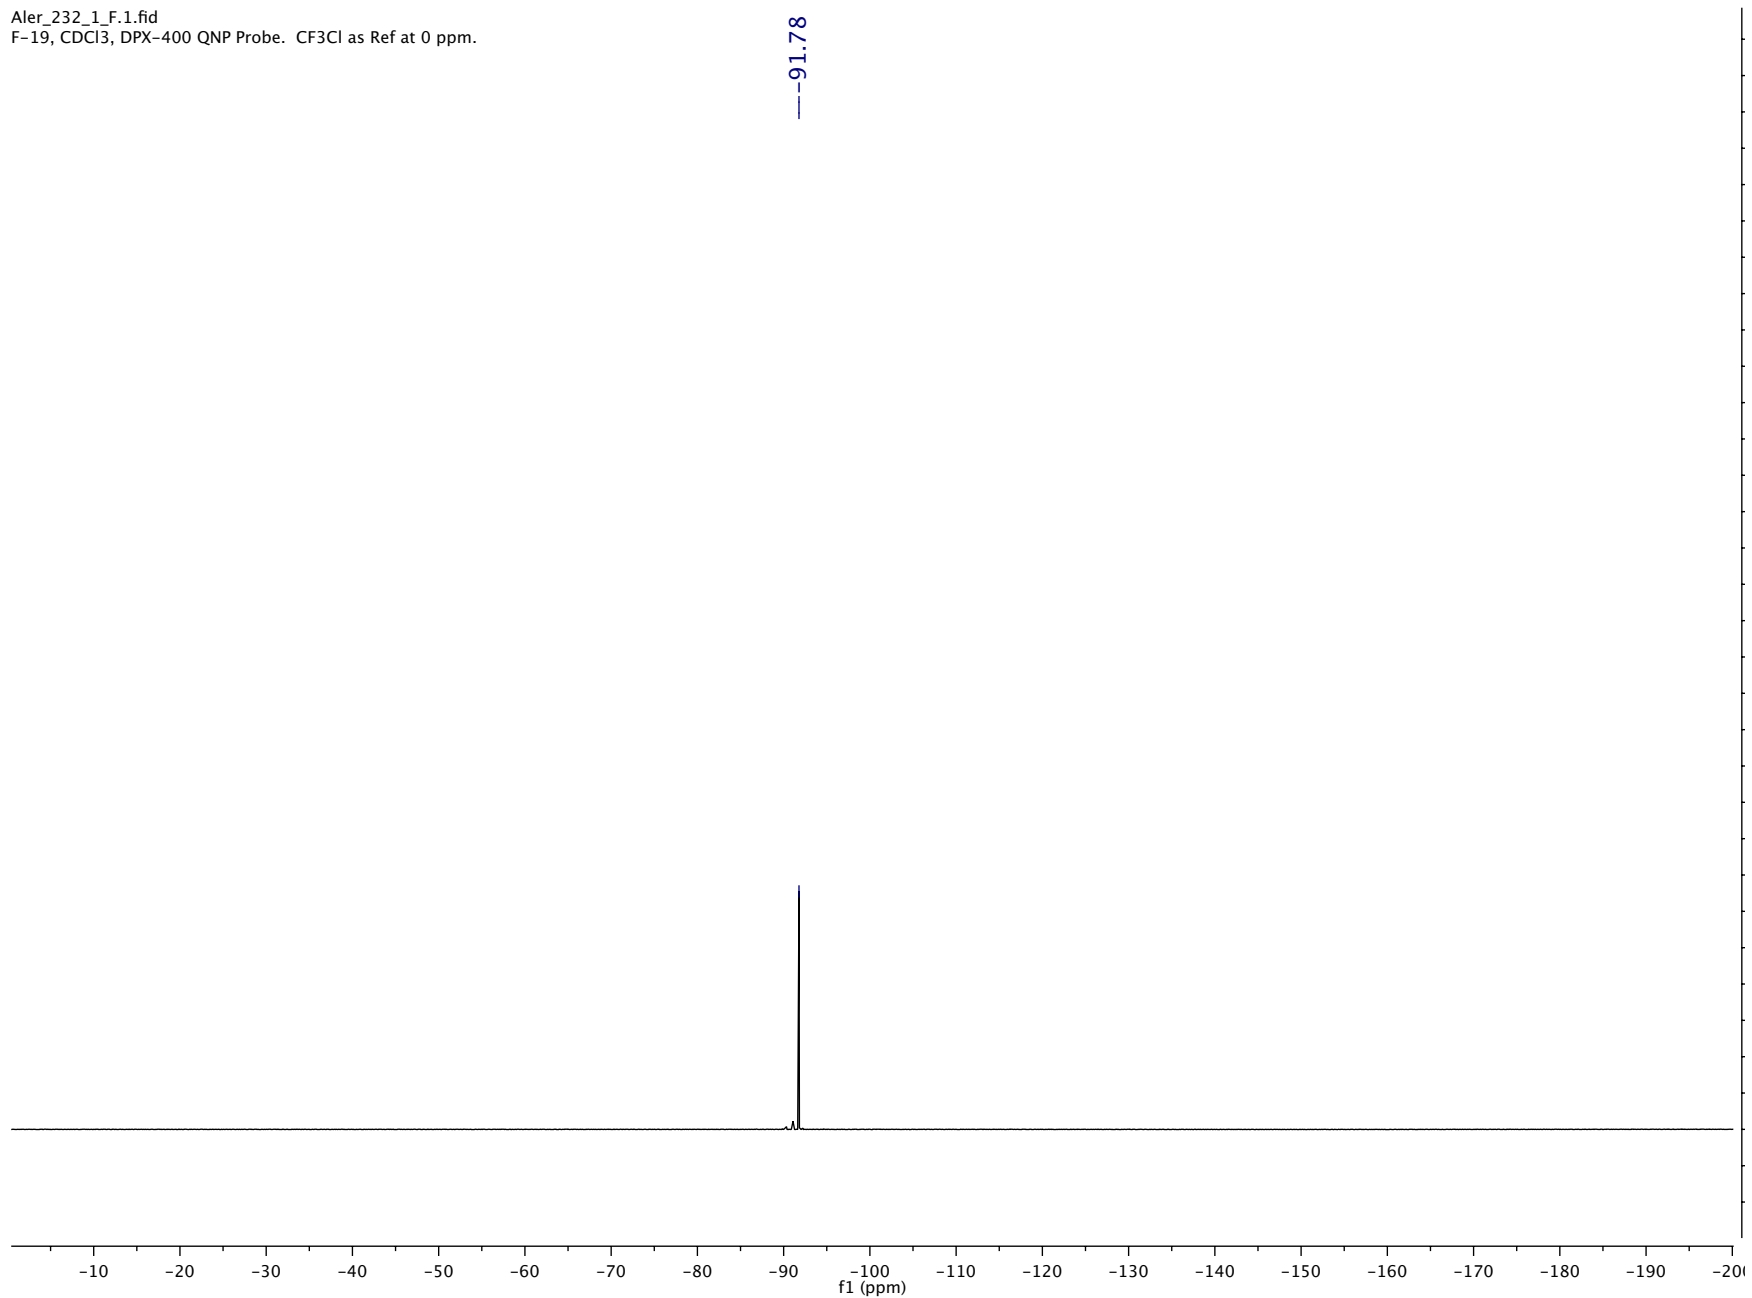

SI-83

3-88-1-MeOD-H-re/1  
H-1 Routine 1D experiment. 13C Probe, 9-13-2007

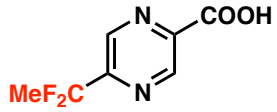

21

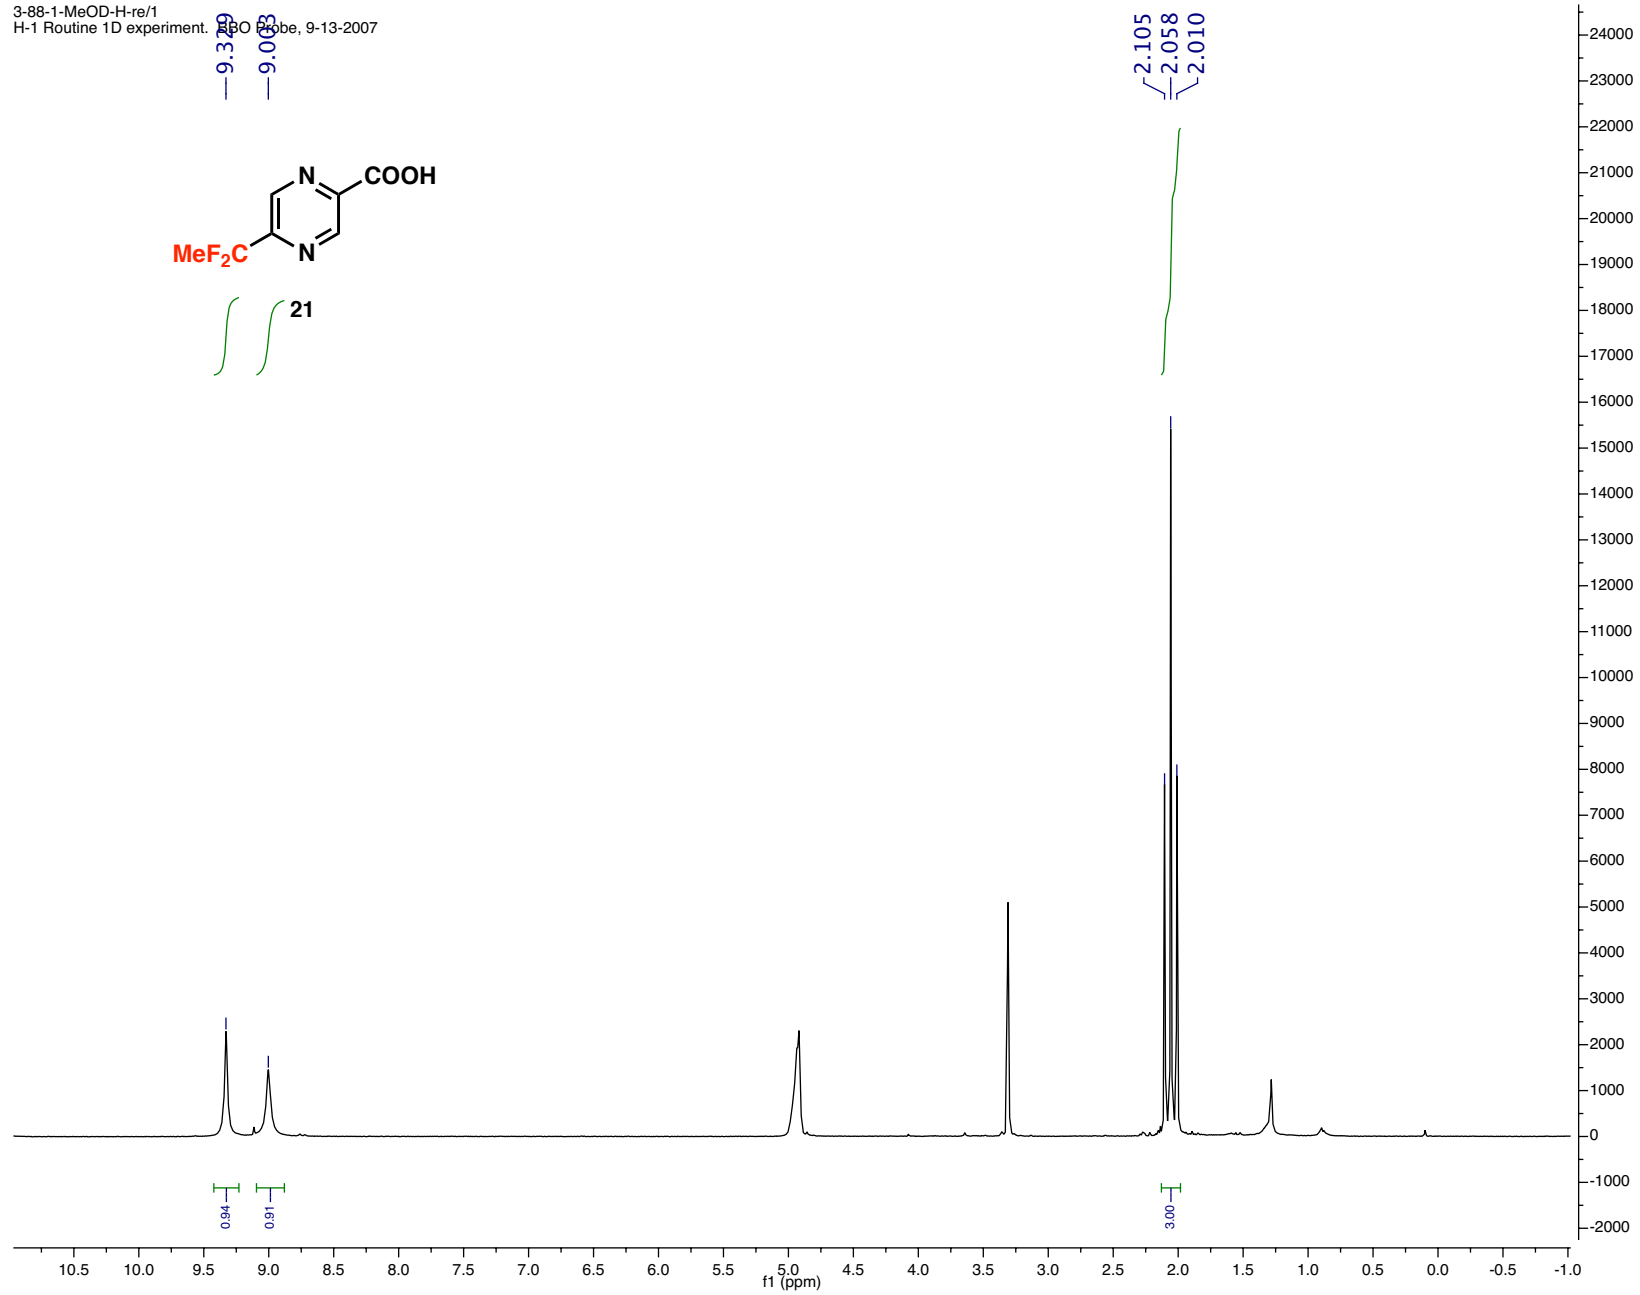

SI-84

3-88-1--MeOD-13C/1  
C-13 Routine 1D, DCH CryoProbe, 10-26-2006

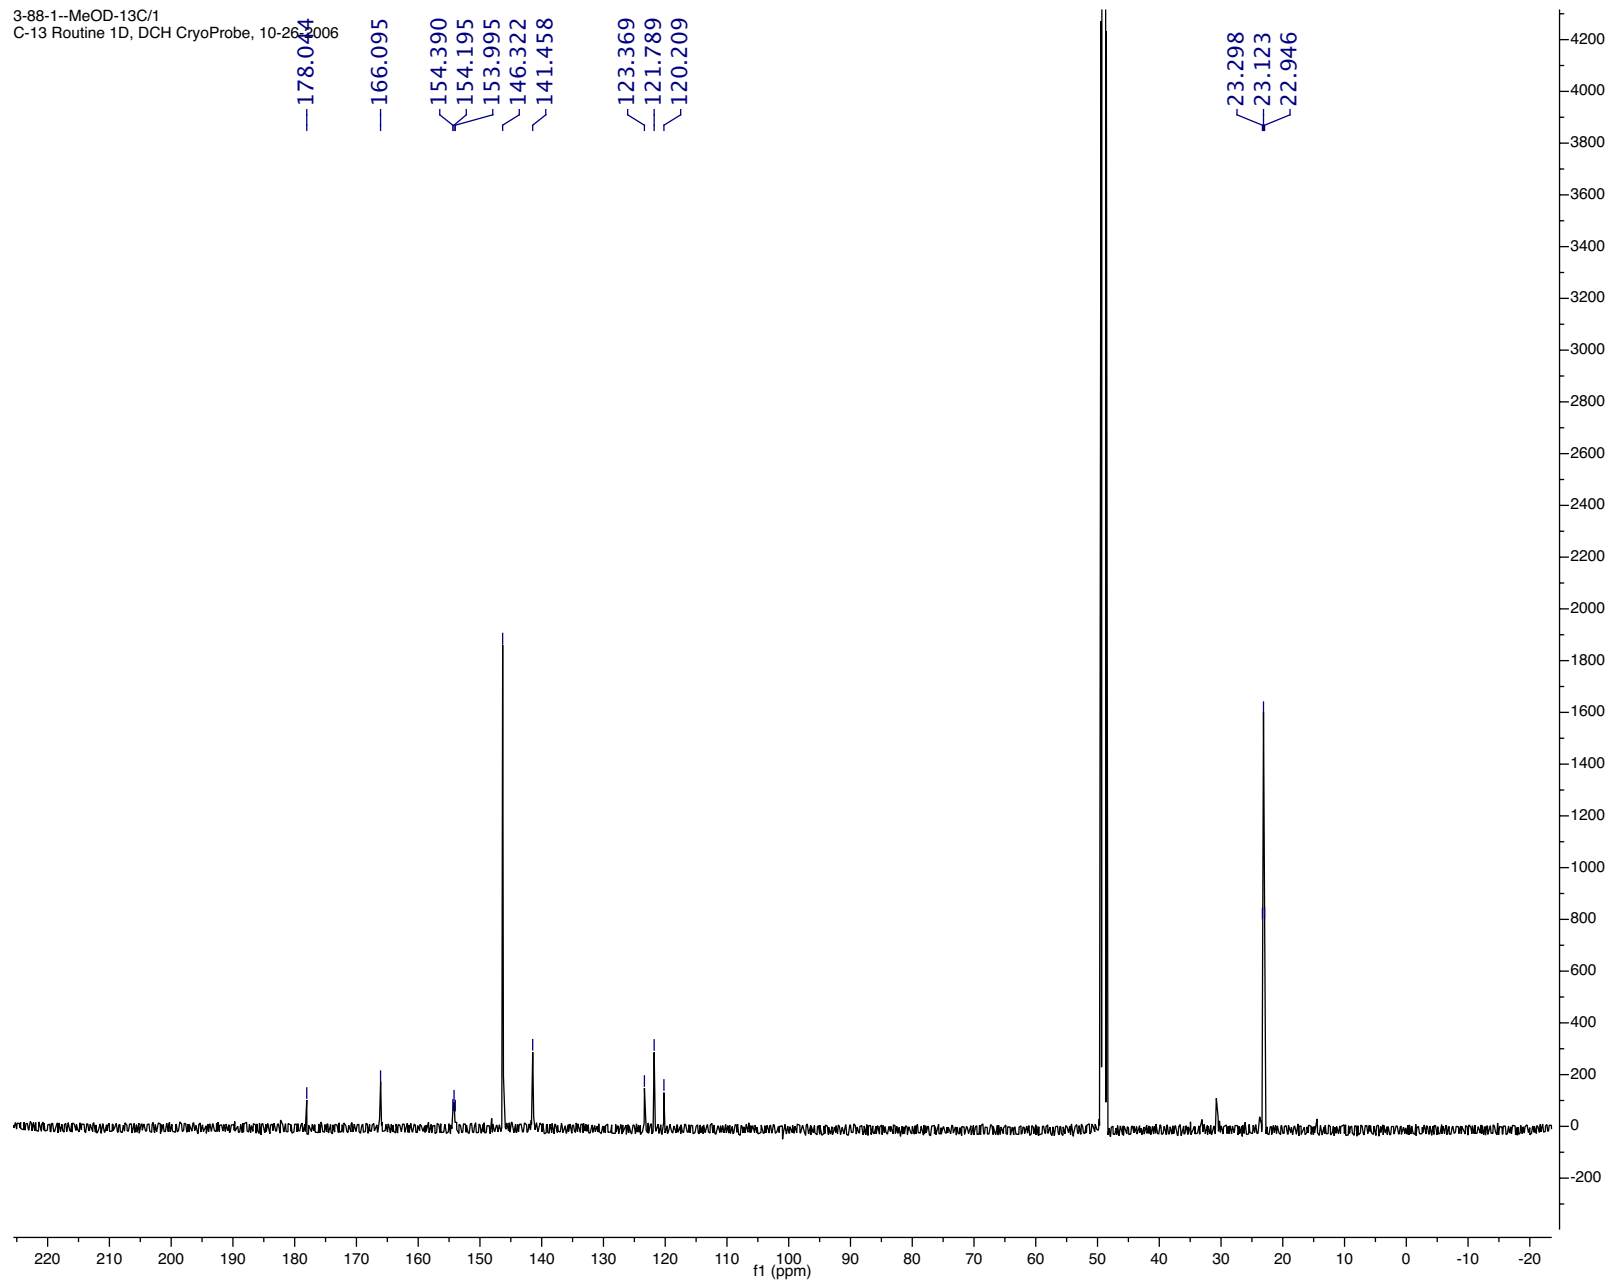

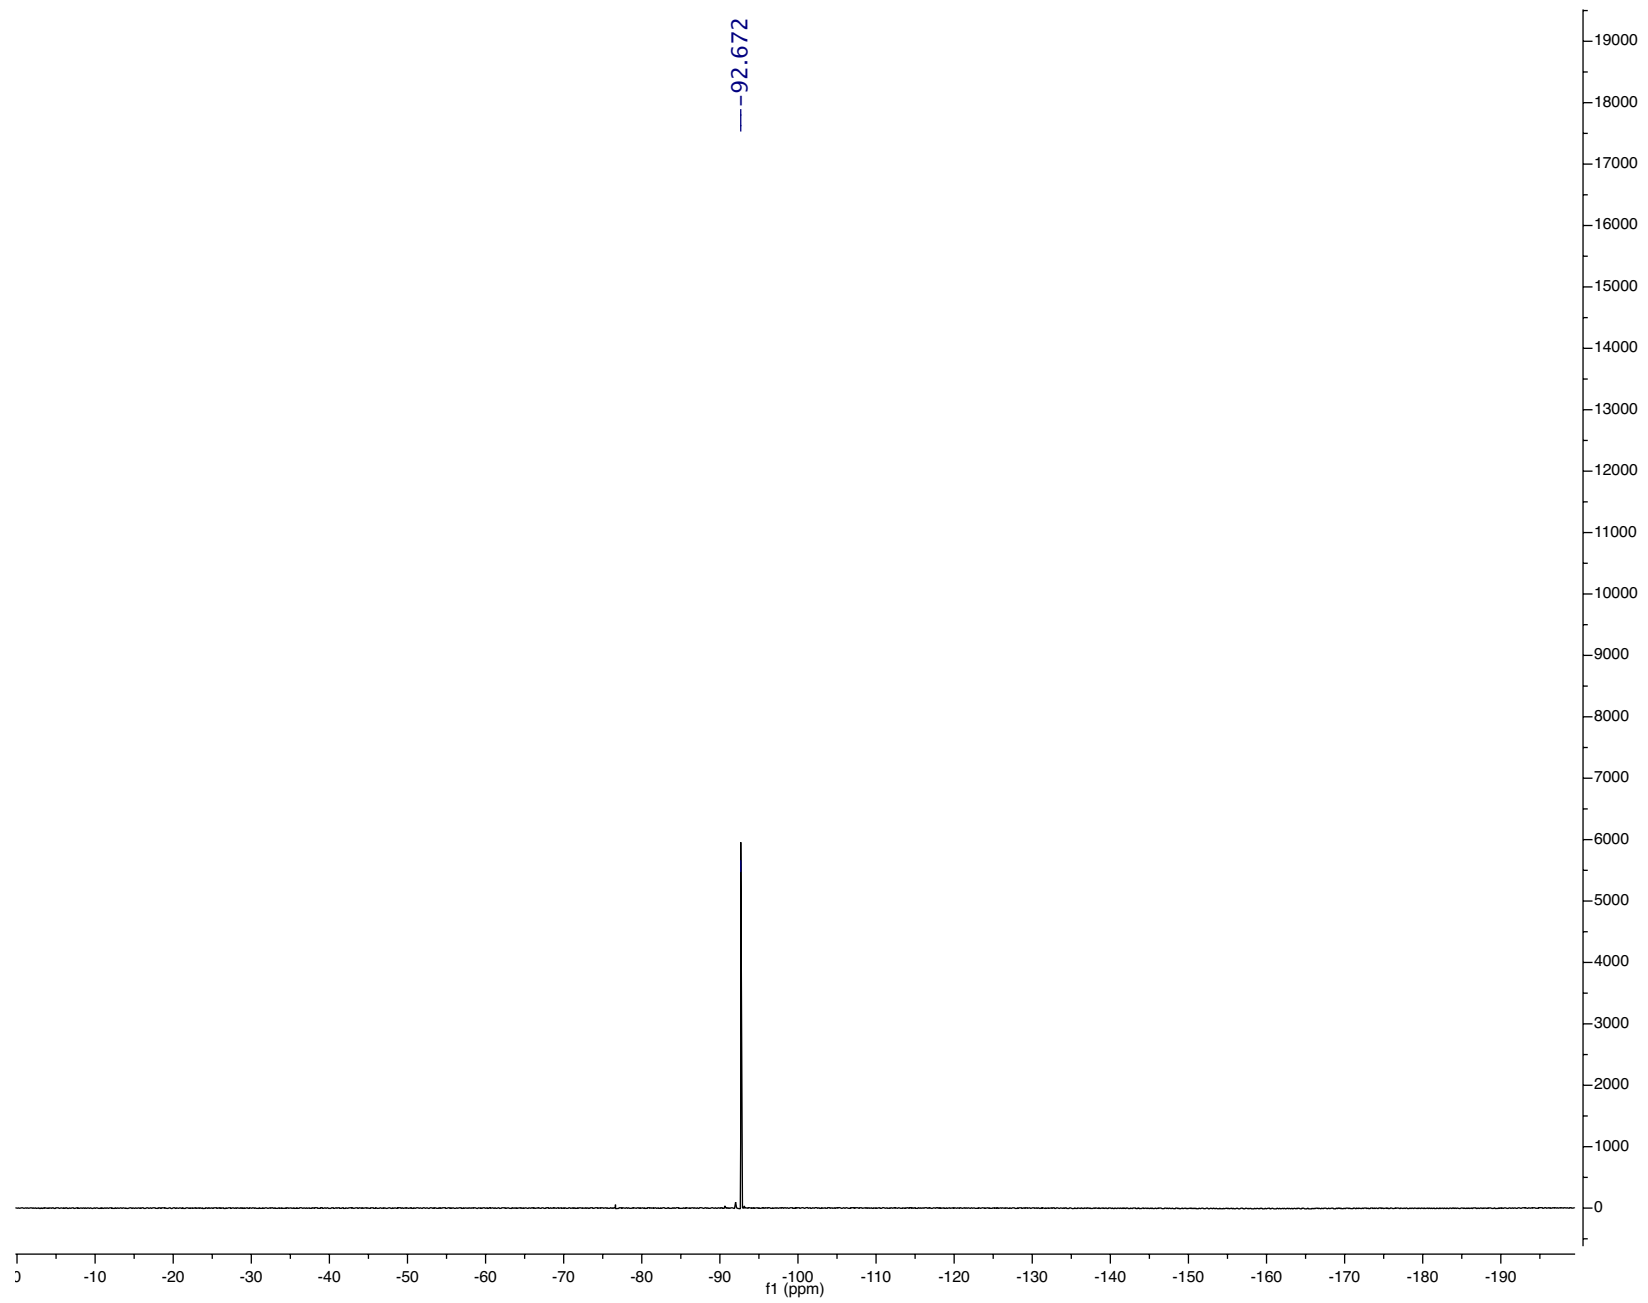

--92.672

SI-86

3-82-1-p/1  
H-1 Routine 1D, DC

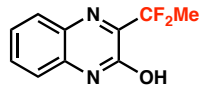

22

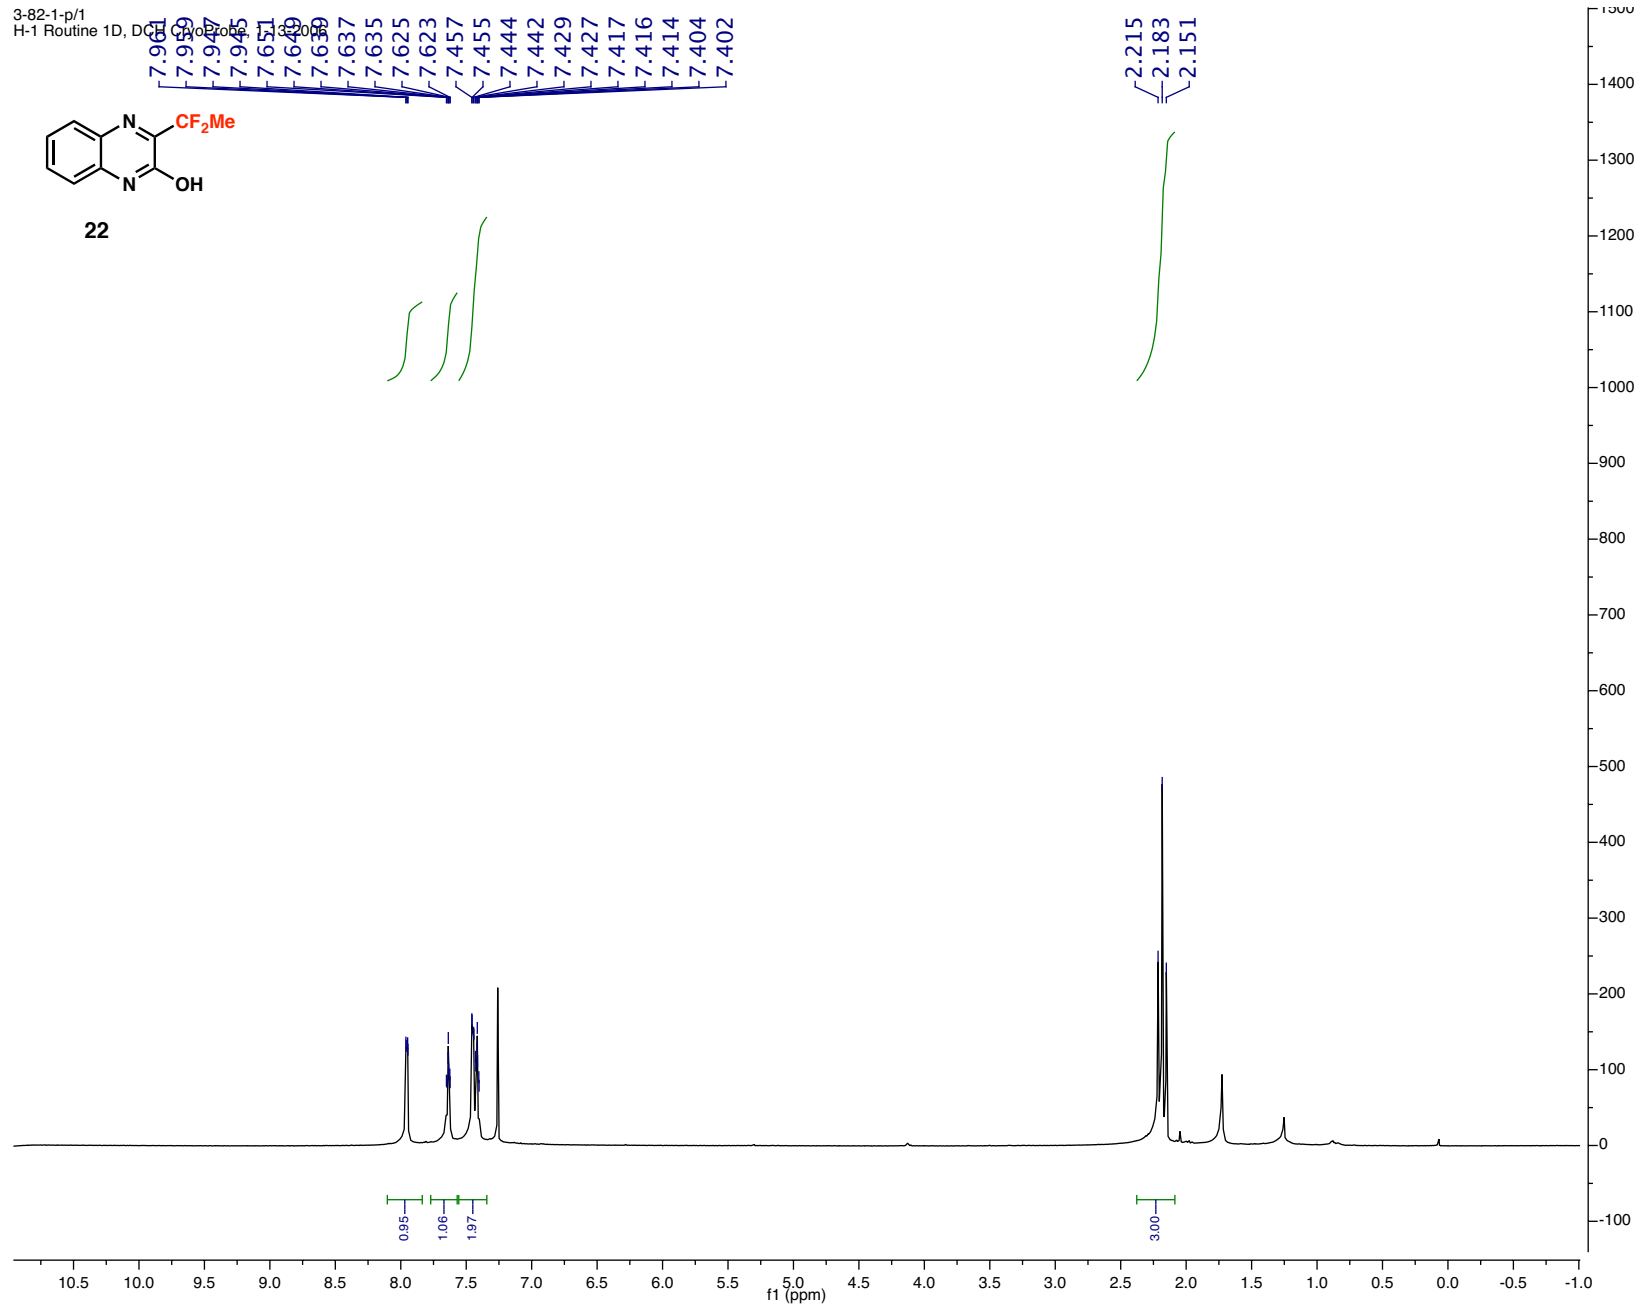

SI-87

3-82-1-p-13C/1  
C-13 Routine 1D, DCH CryoProbe, 10-26-2006

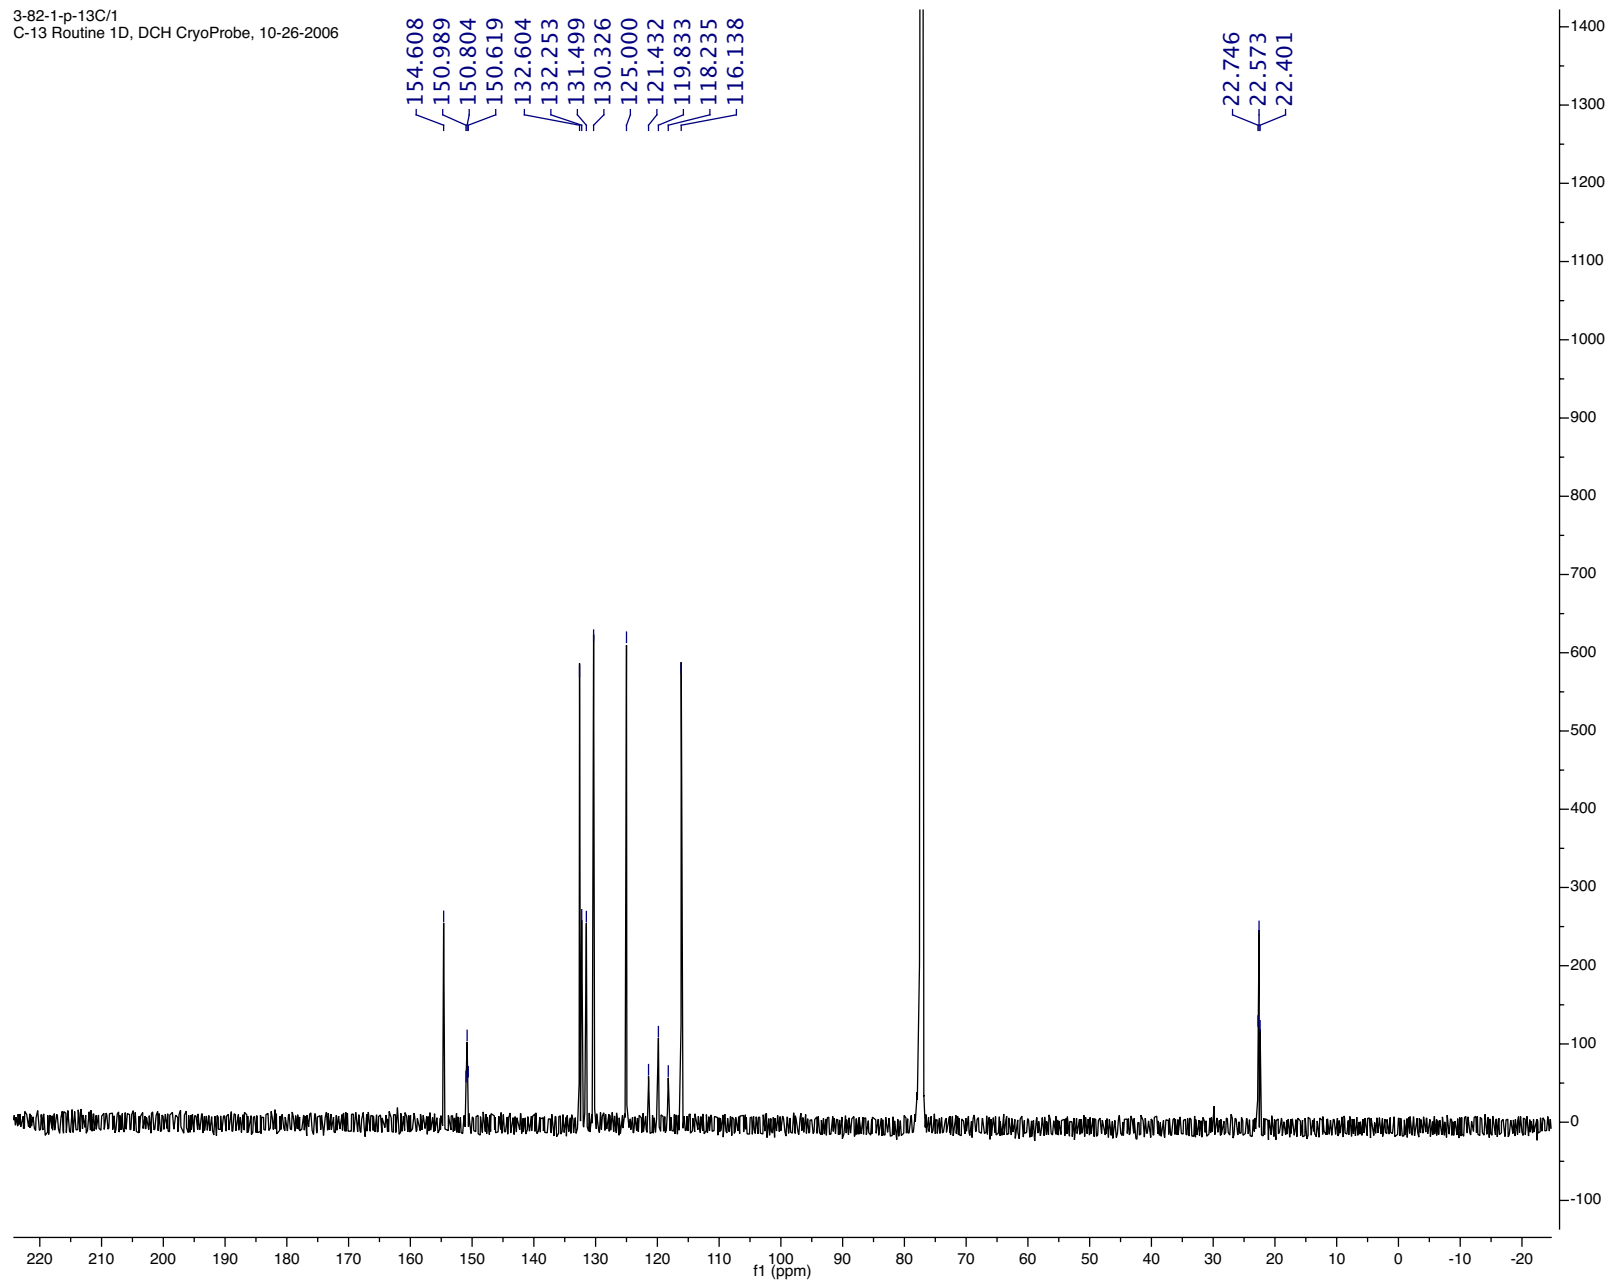

SI-88



3-82-1-crude-F/1  
F-19, CDCl<sub>3</sub>, DPX-400 QNP Probe. CF<sub>3</sub>Cl as Ref at 0 ppm.

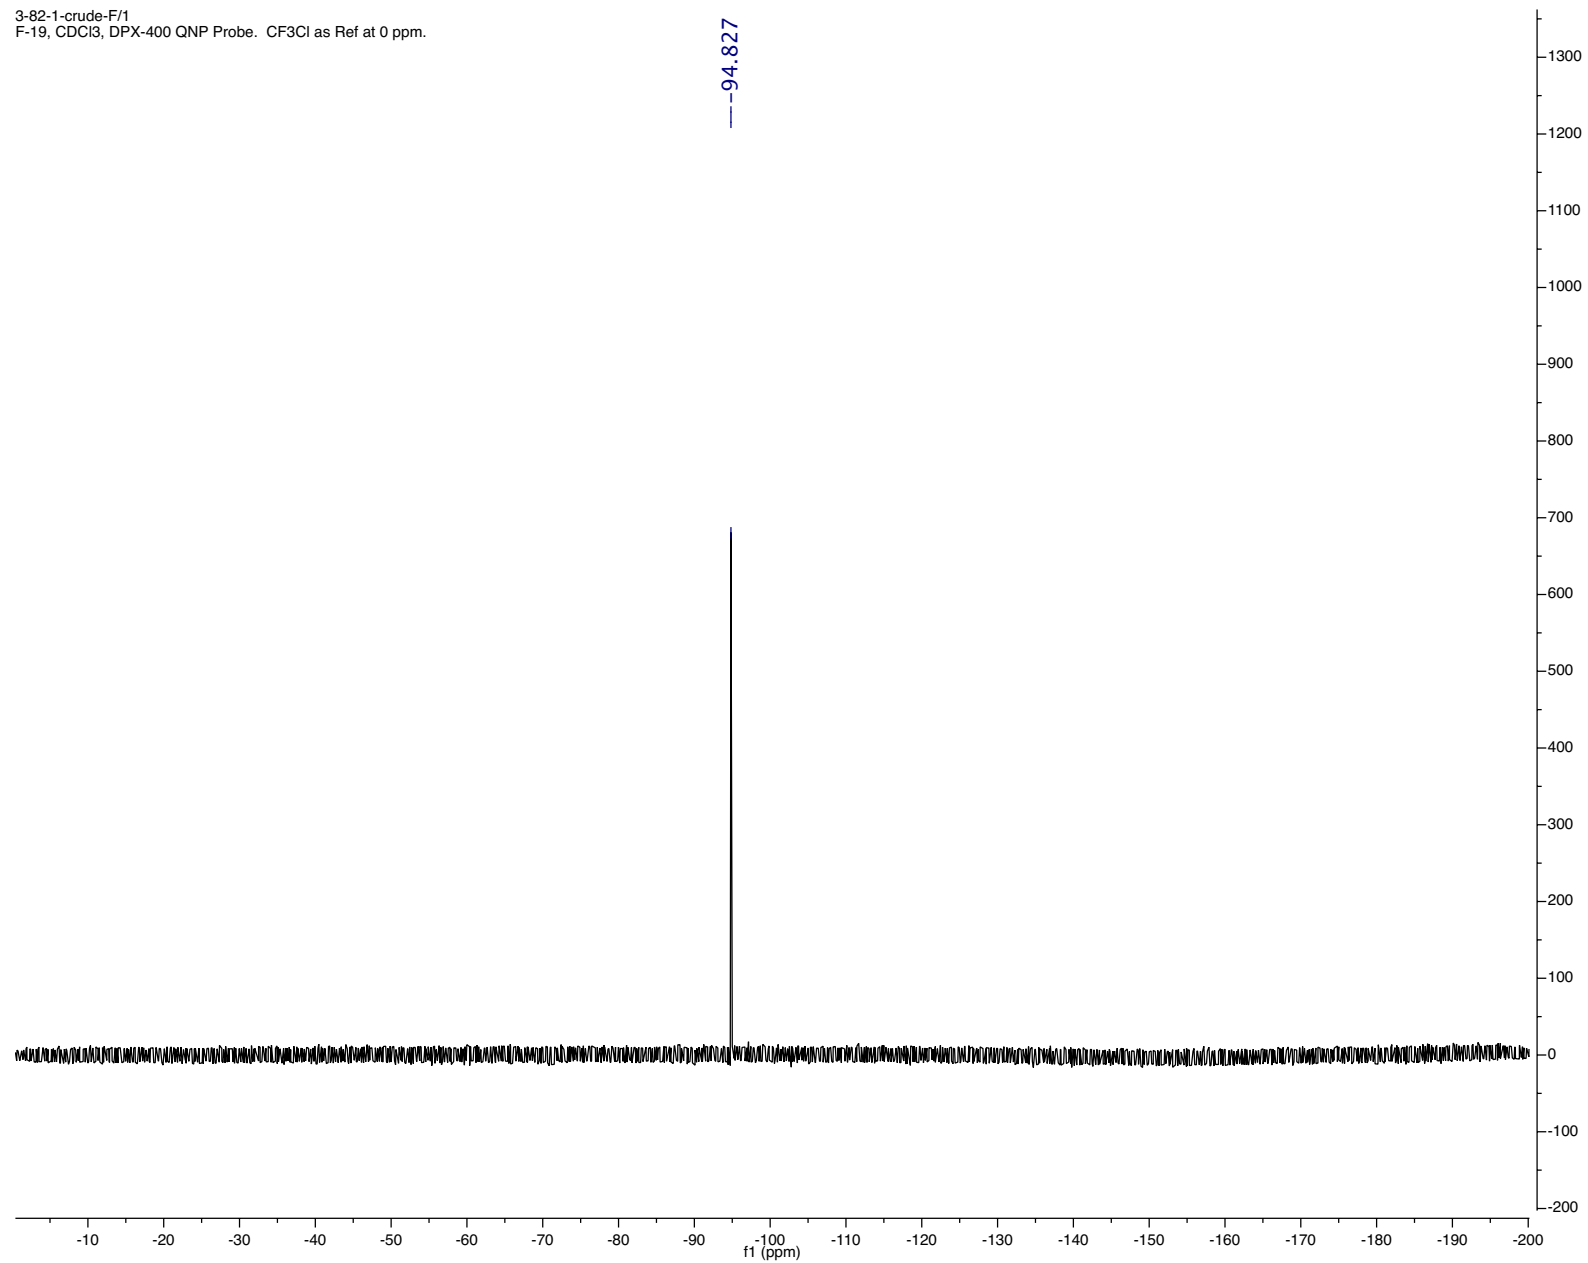

SI-89

3-85-3-3-column-H/1  
H-1 Routine 1D experiment

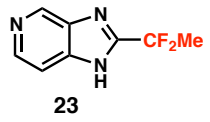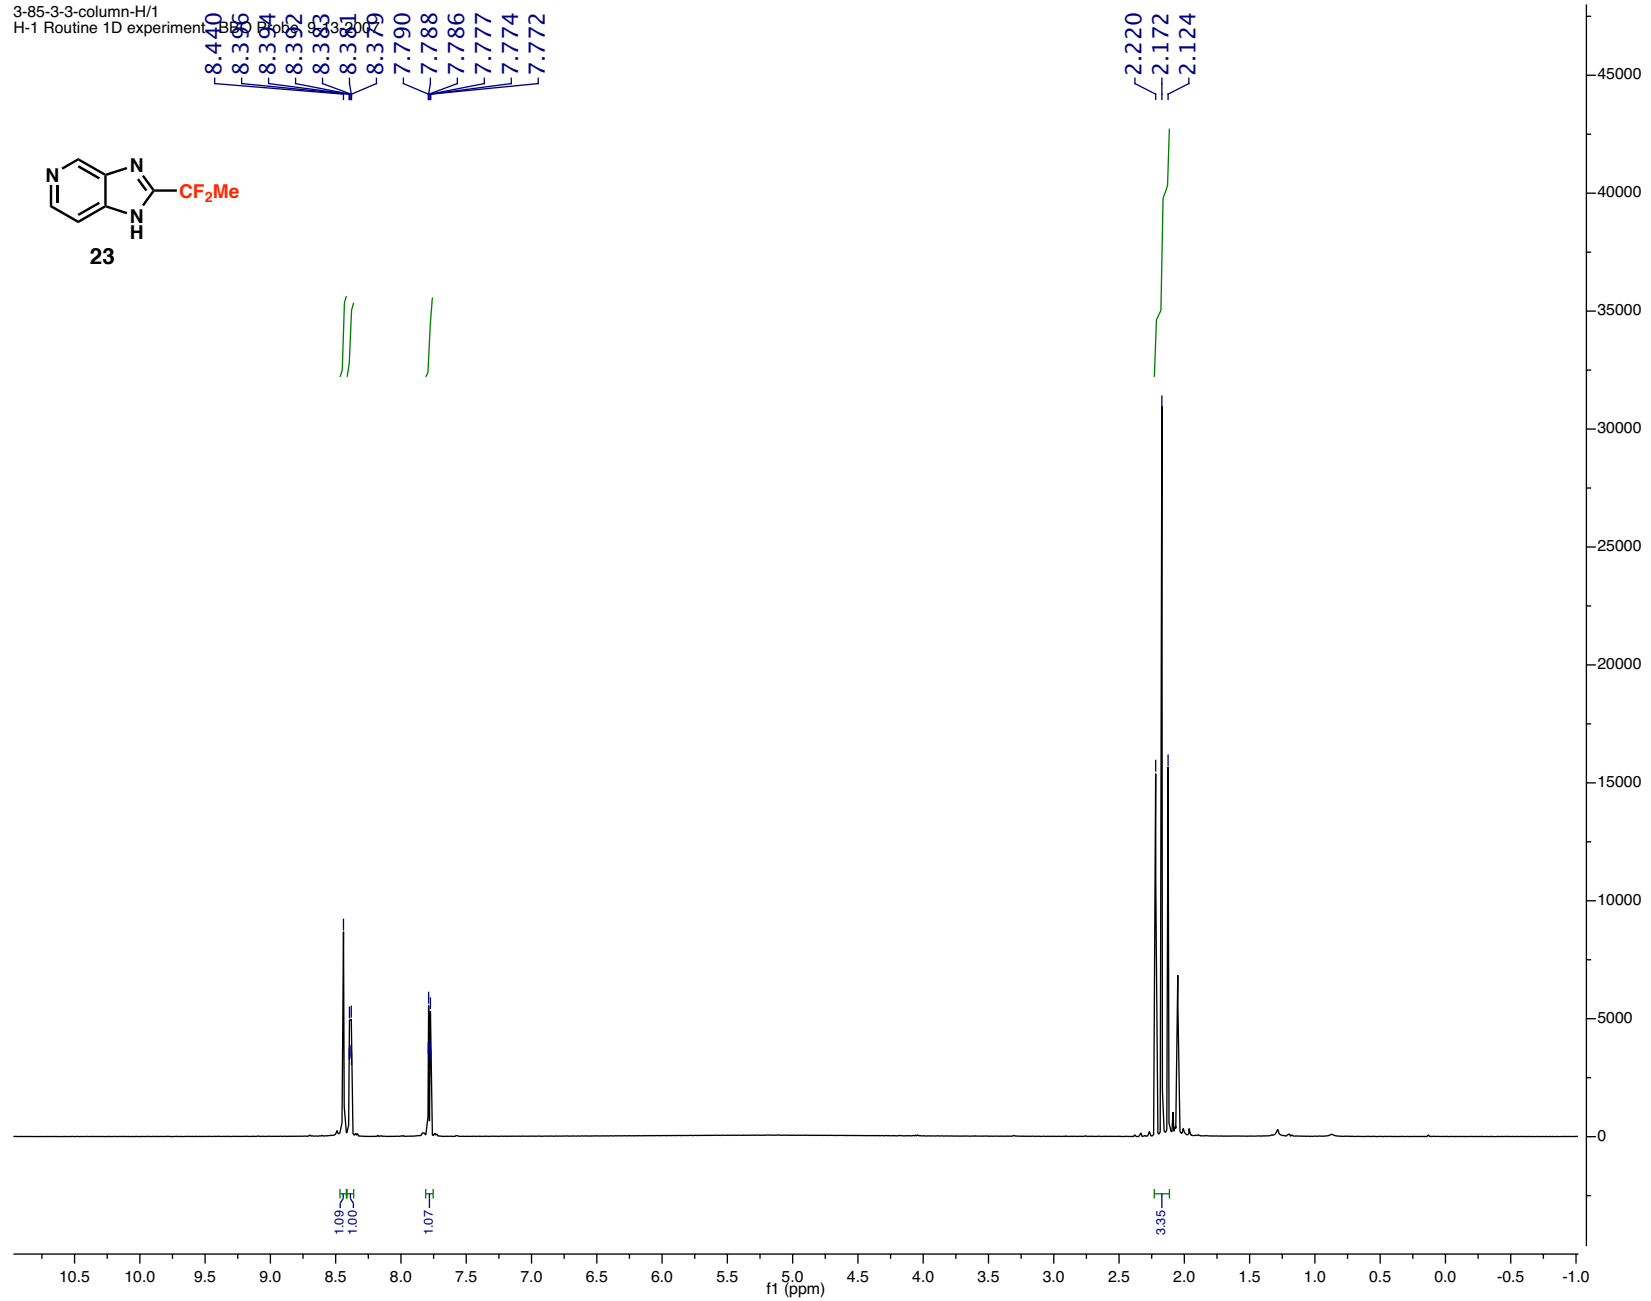

SI-90

3-85-3-3-column13C-final/1  
C-13 Routine 1D, DCH CryoProbe, 10-26-2006

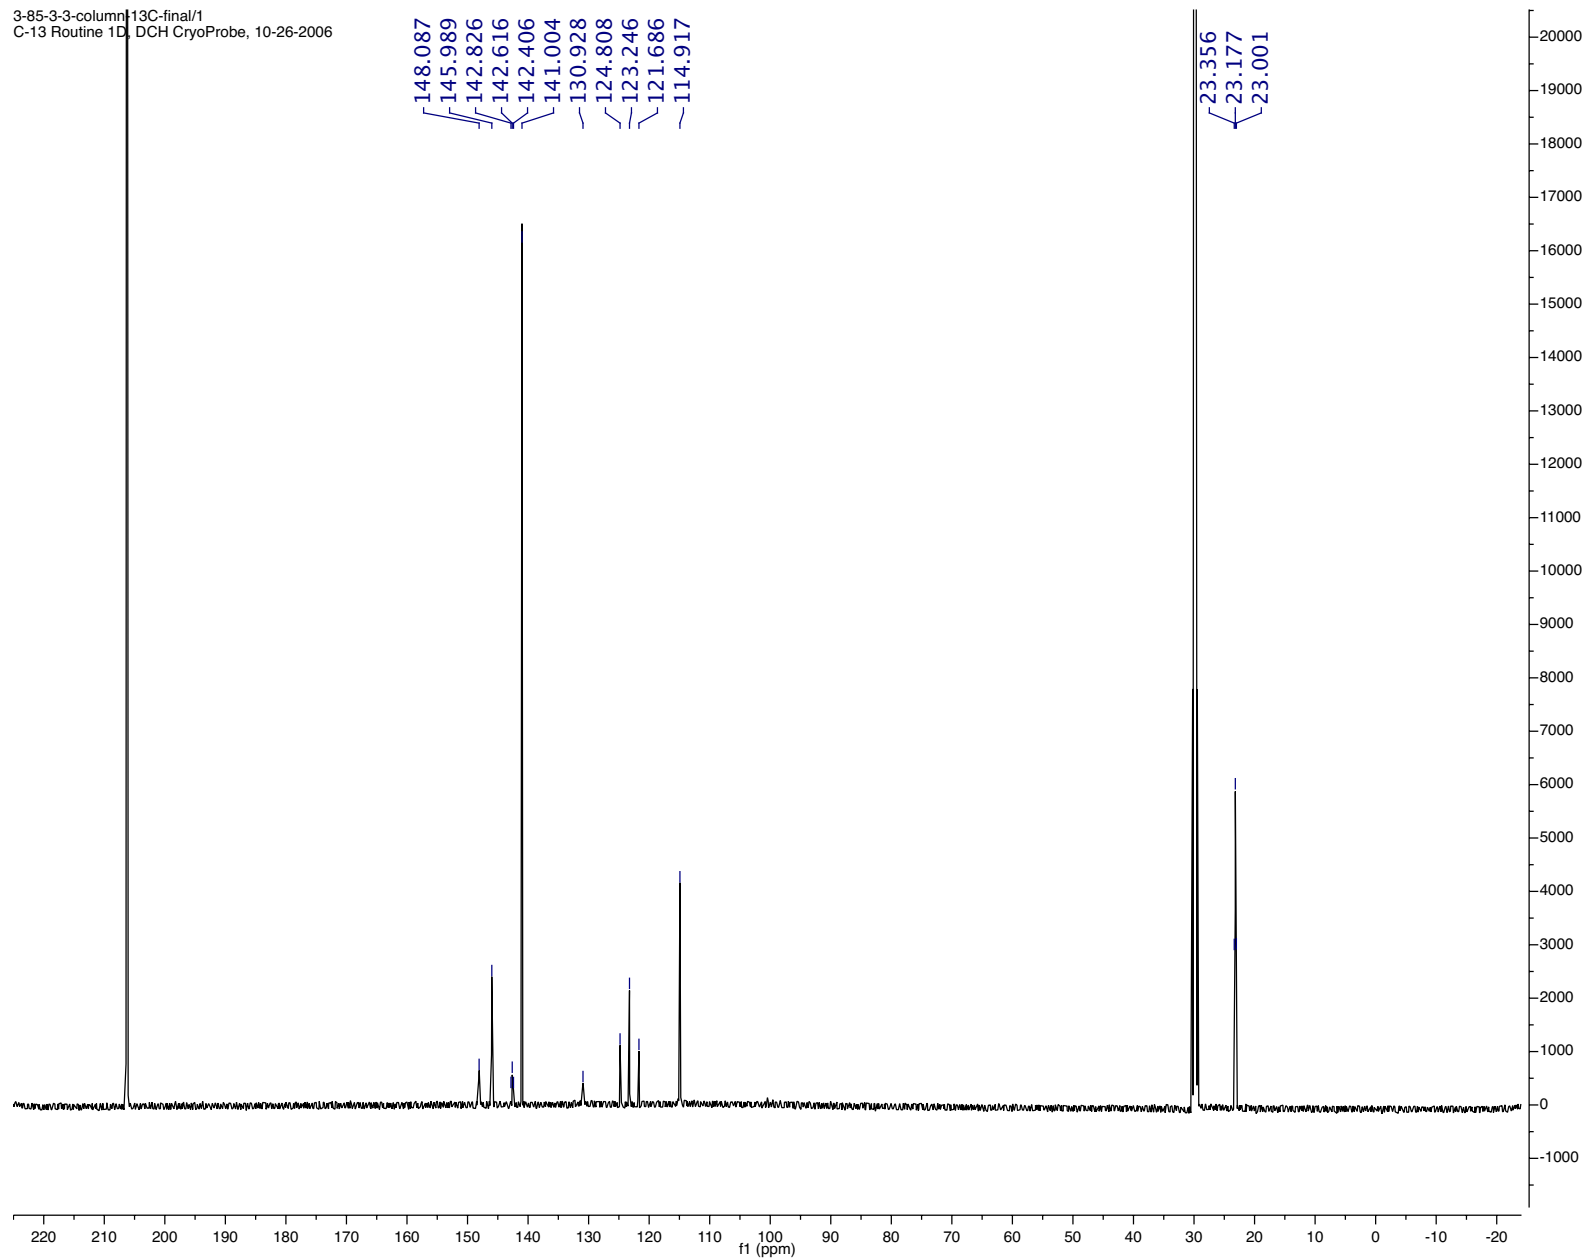

3-85-3-3-F-acetone/1  
F-19, Acetone, DPX-400 QNP Probe. CF3Cl as Ref at 0 ppm.

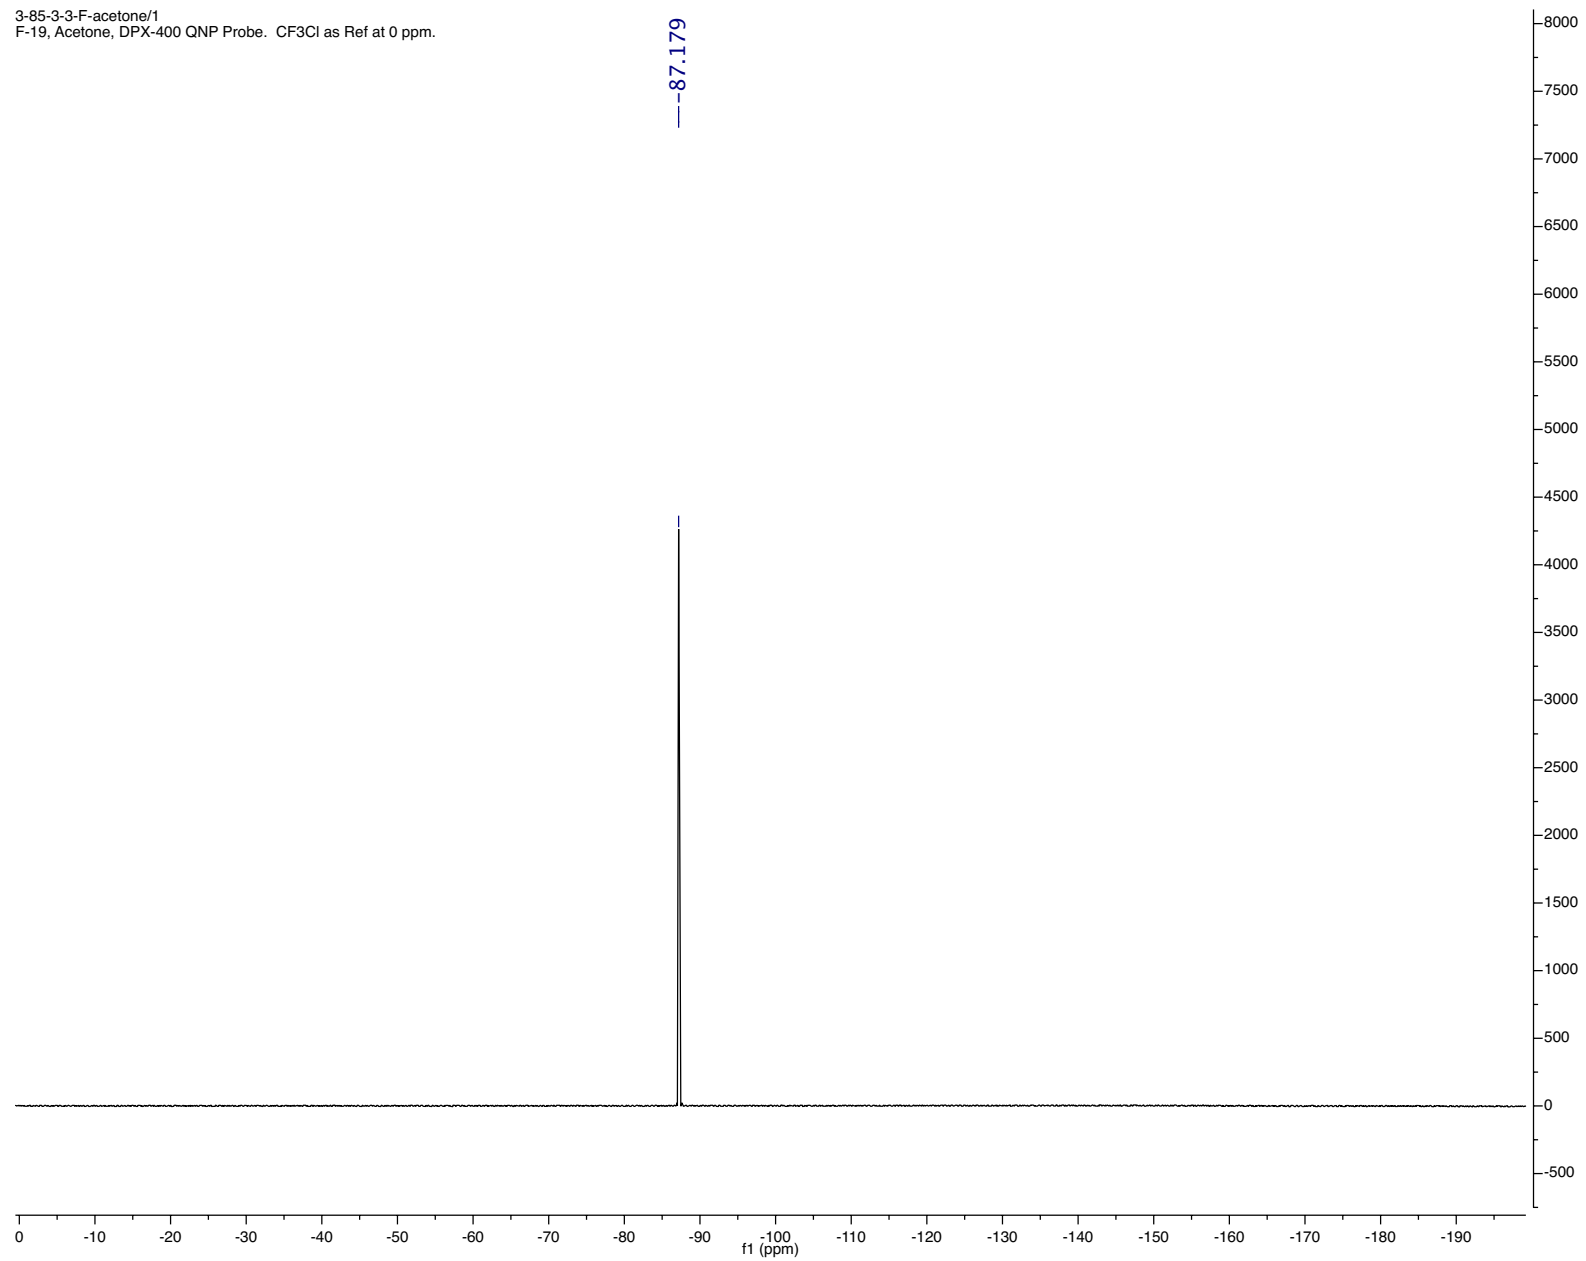

SI-92

3-73-3-1-H-fina/1  
H-1 Routine experiment.

BBO Probe, 9/13/2007

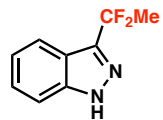

24

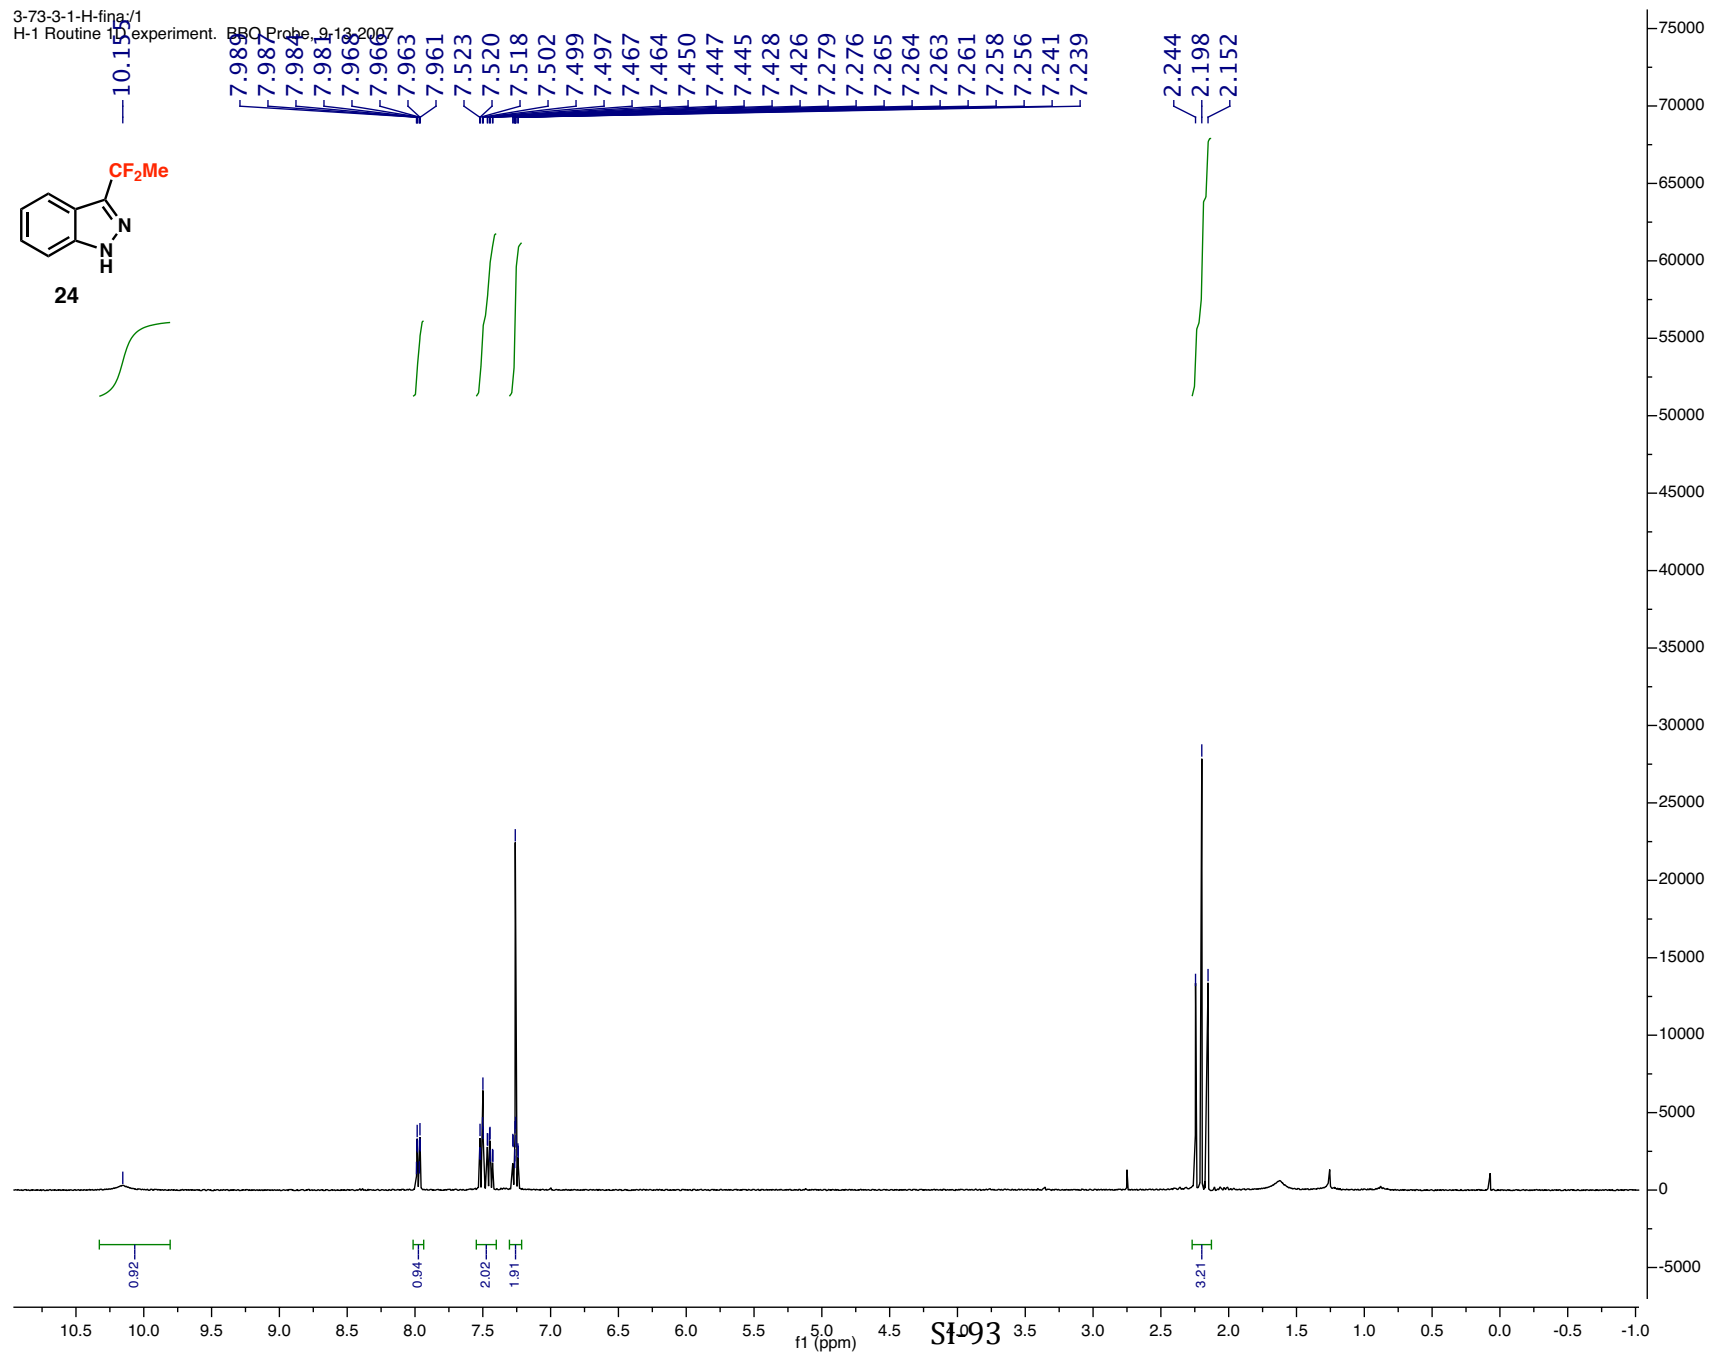

3-73-3-1-13C/1  
C-13 Routine 1D, DCH CryoProbe, 10-26-2006

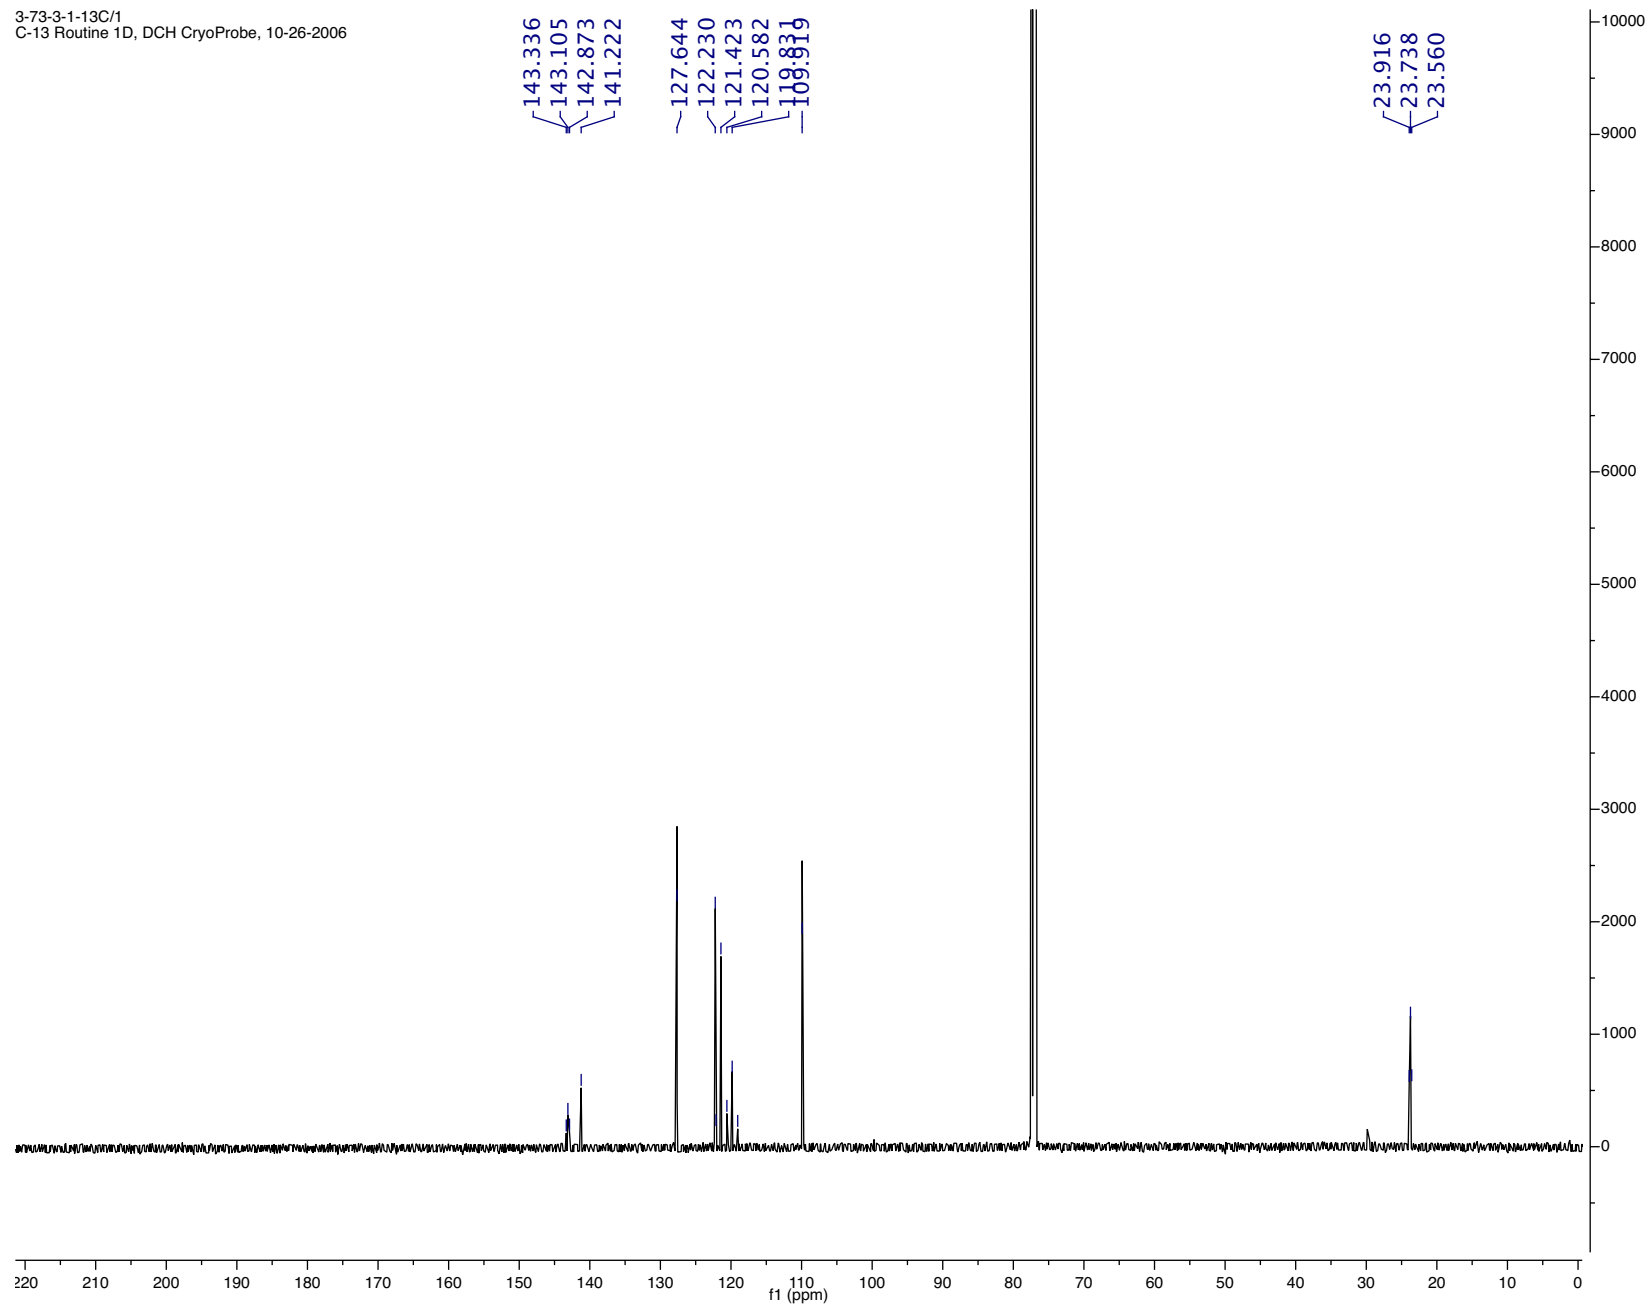

SI-94

3-73-3-1-F/1  
F-19, CDCl<sub>3</sub>, DPX-400 QNP Probe. CF<sub>3</sub>Cl as Ref at 0 ppm.

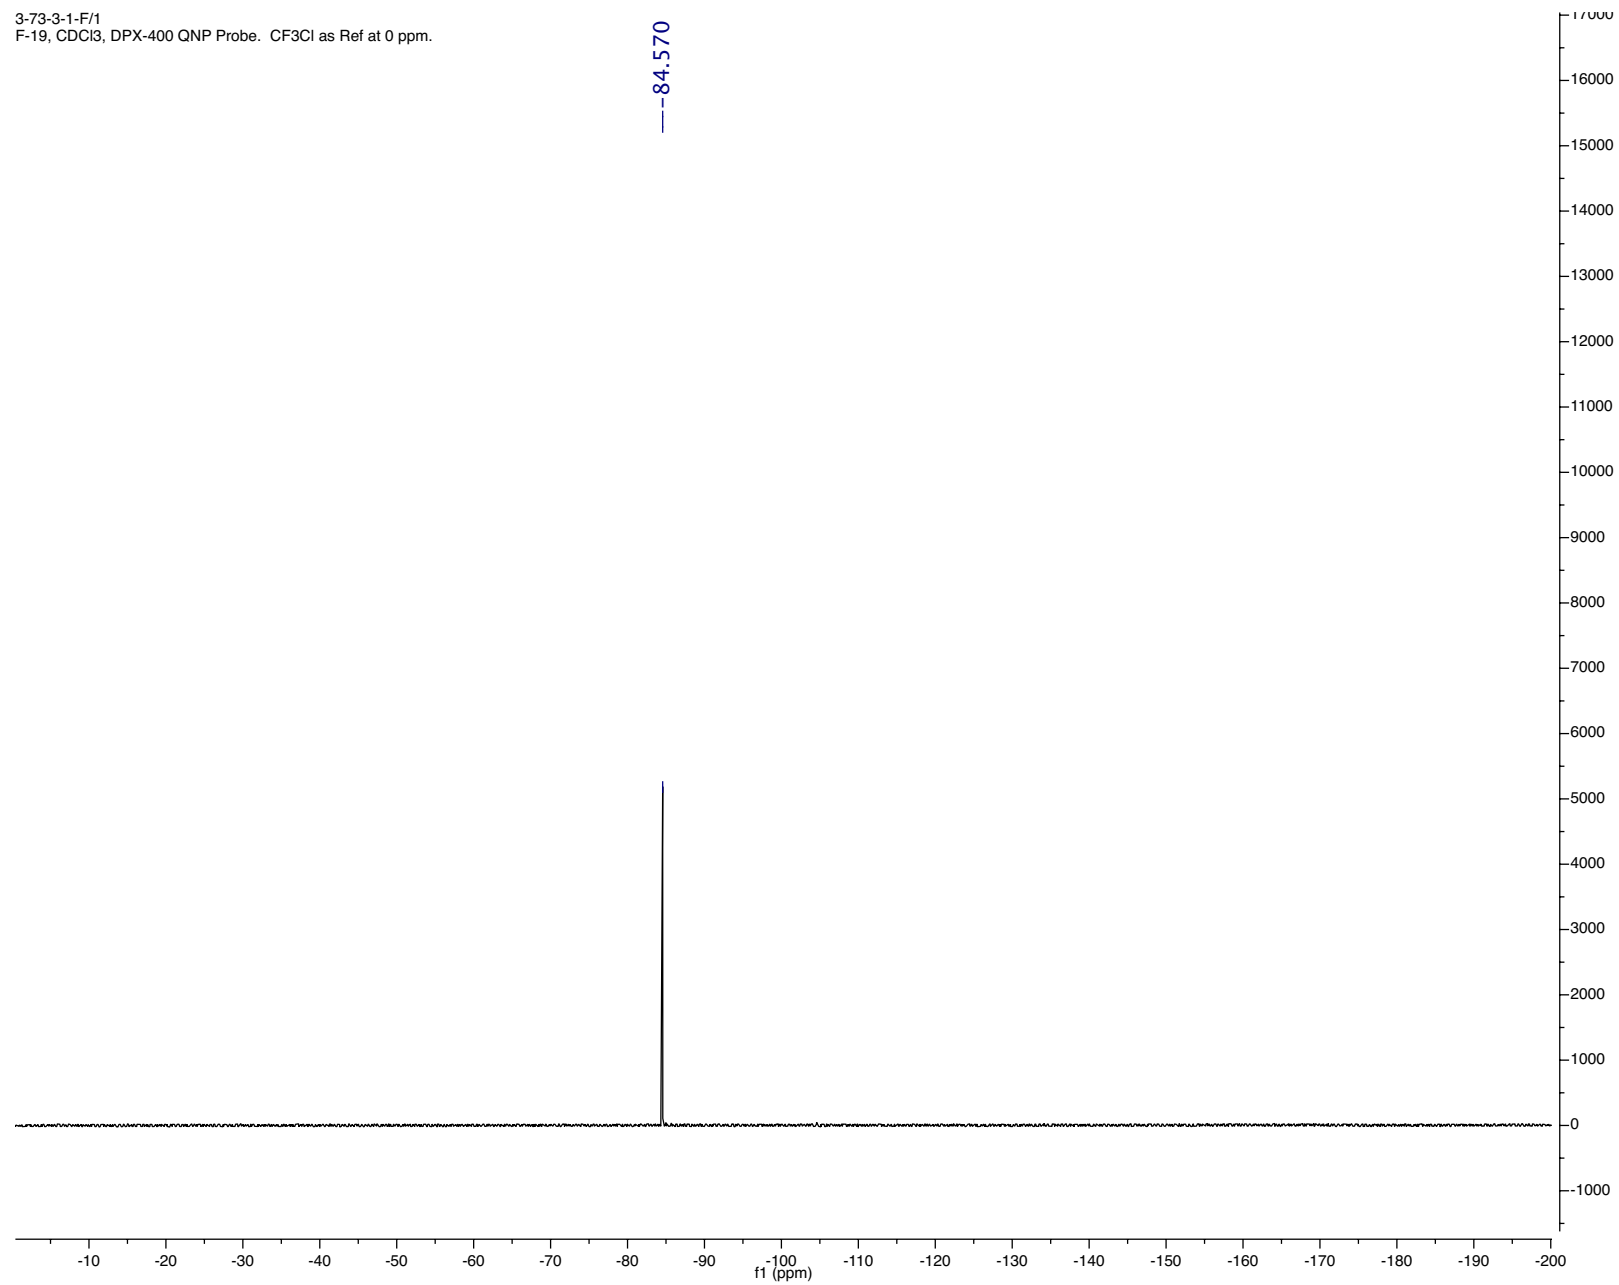

SI-95

3-73-benzimidazole-H-re\_01  
Std proton

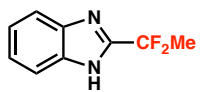

25

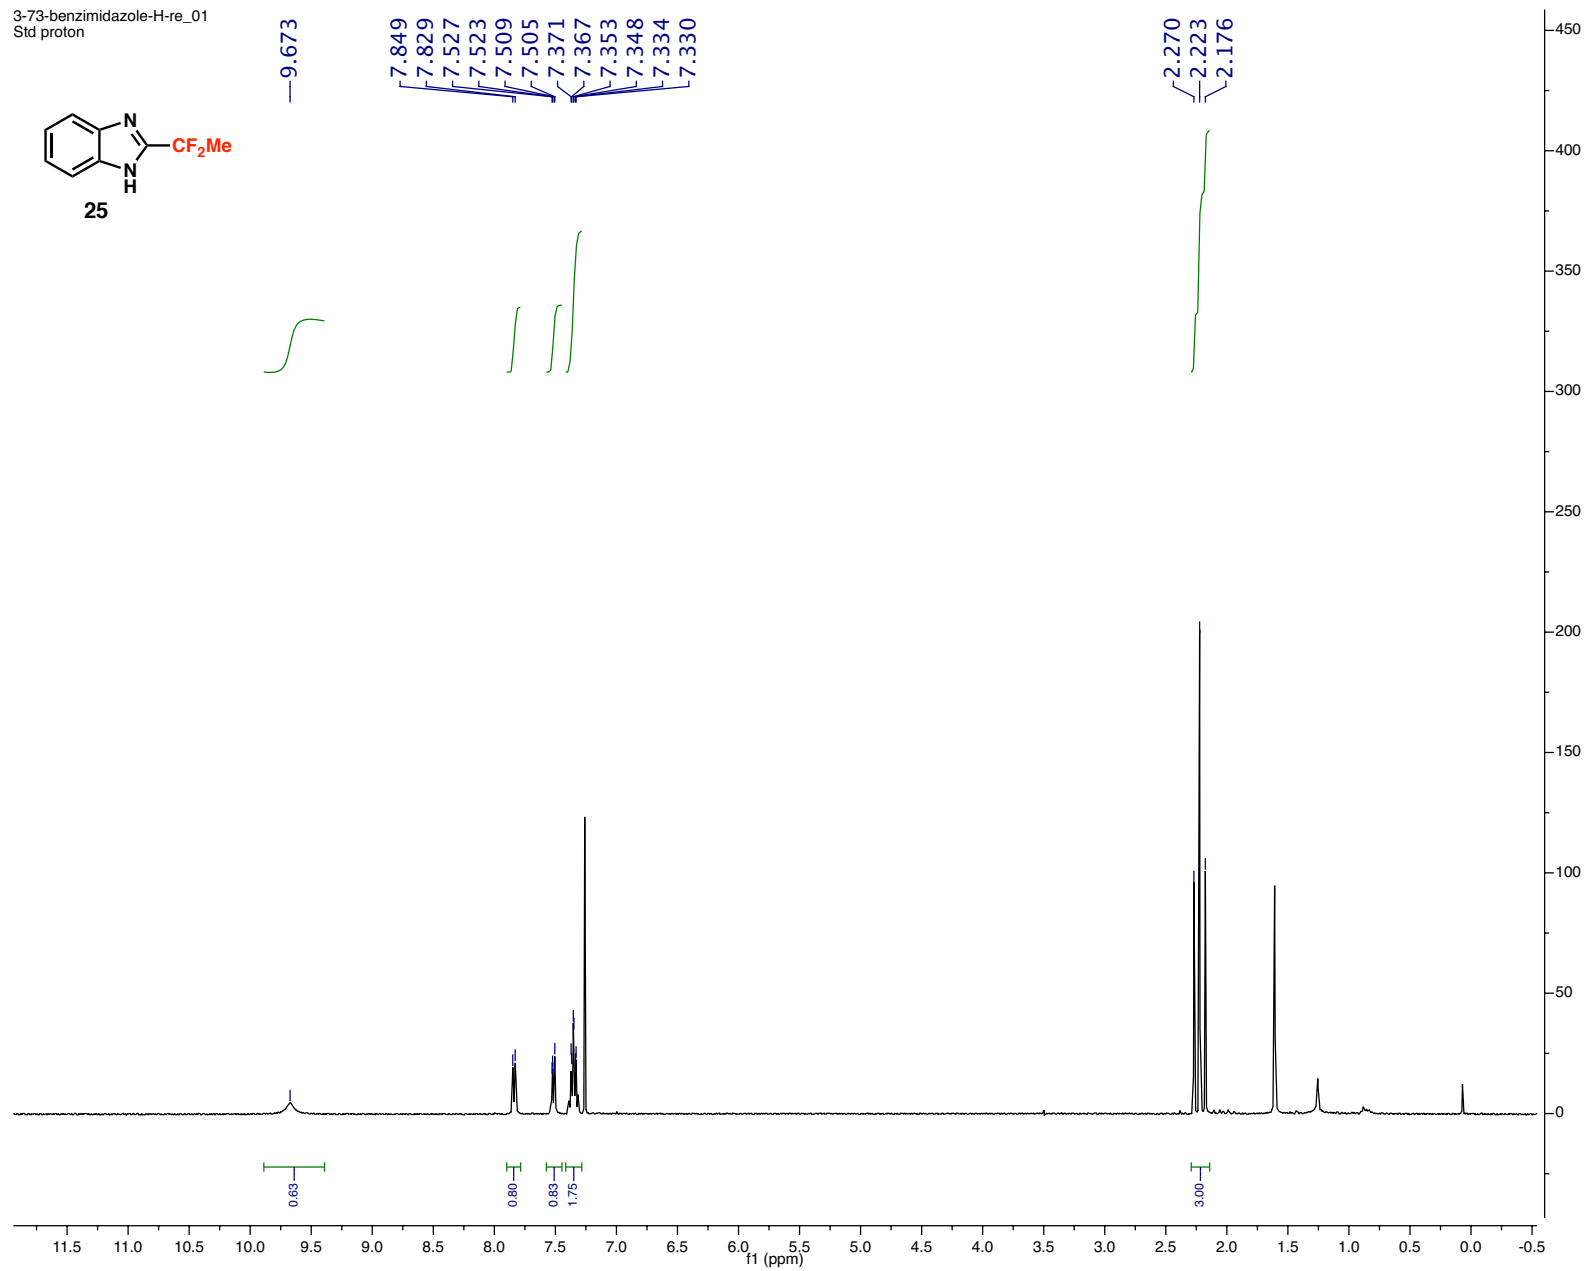



3-73-benzimidazole-13C/1  
C-13 Routine 1D, DCH CryoProbe, 10-26-2006

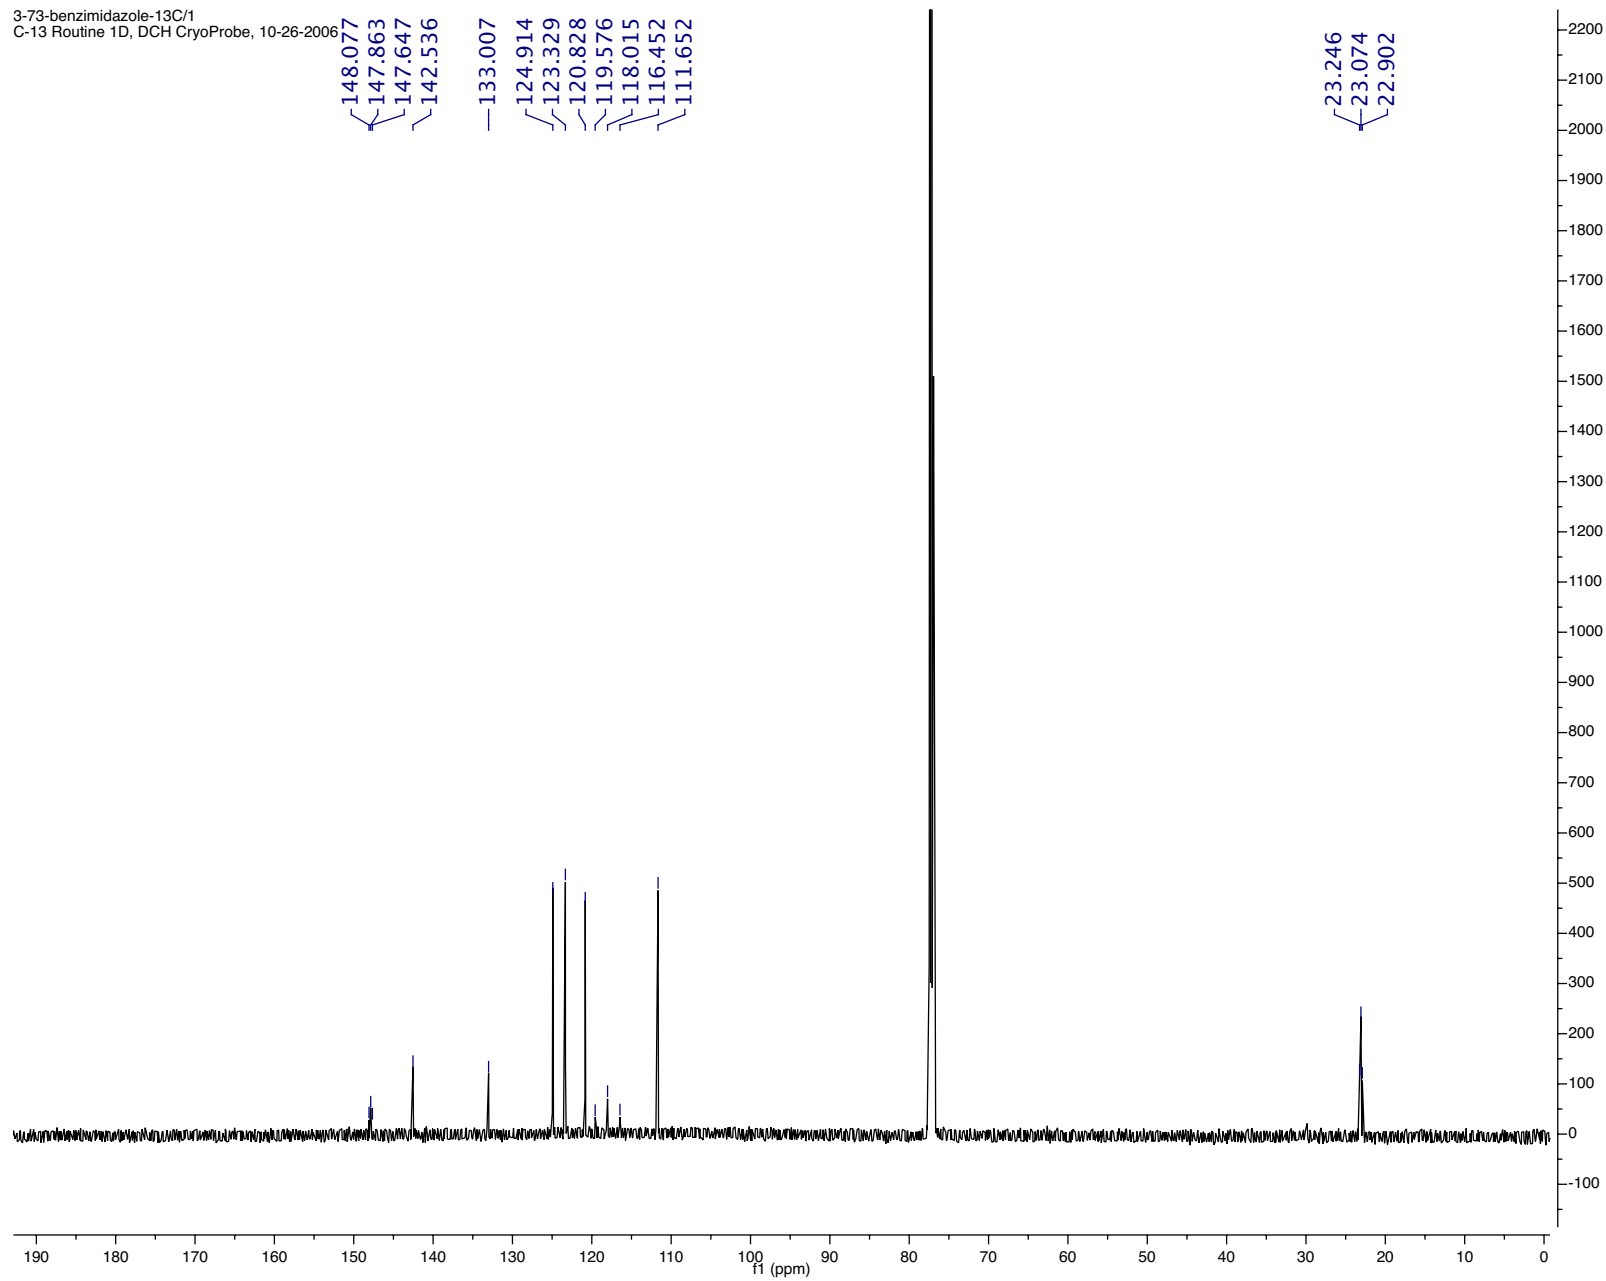

3-73-benzimidazole-F/1  
F-19, CDCl<sub>3</sub>, DPX-400 QNP Probe. CF<sub>3</sub>Cl as Ref at 0 ppm.

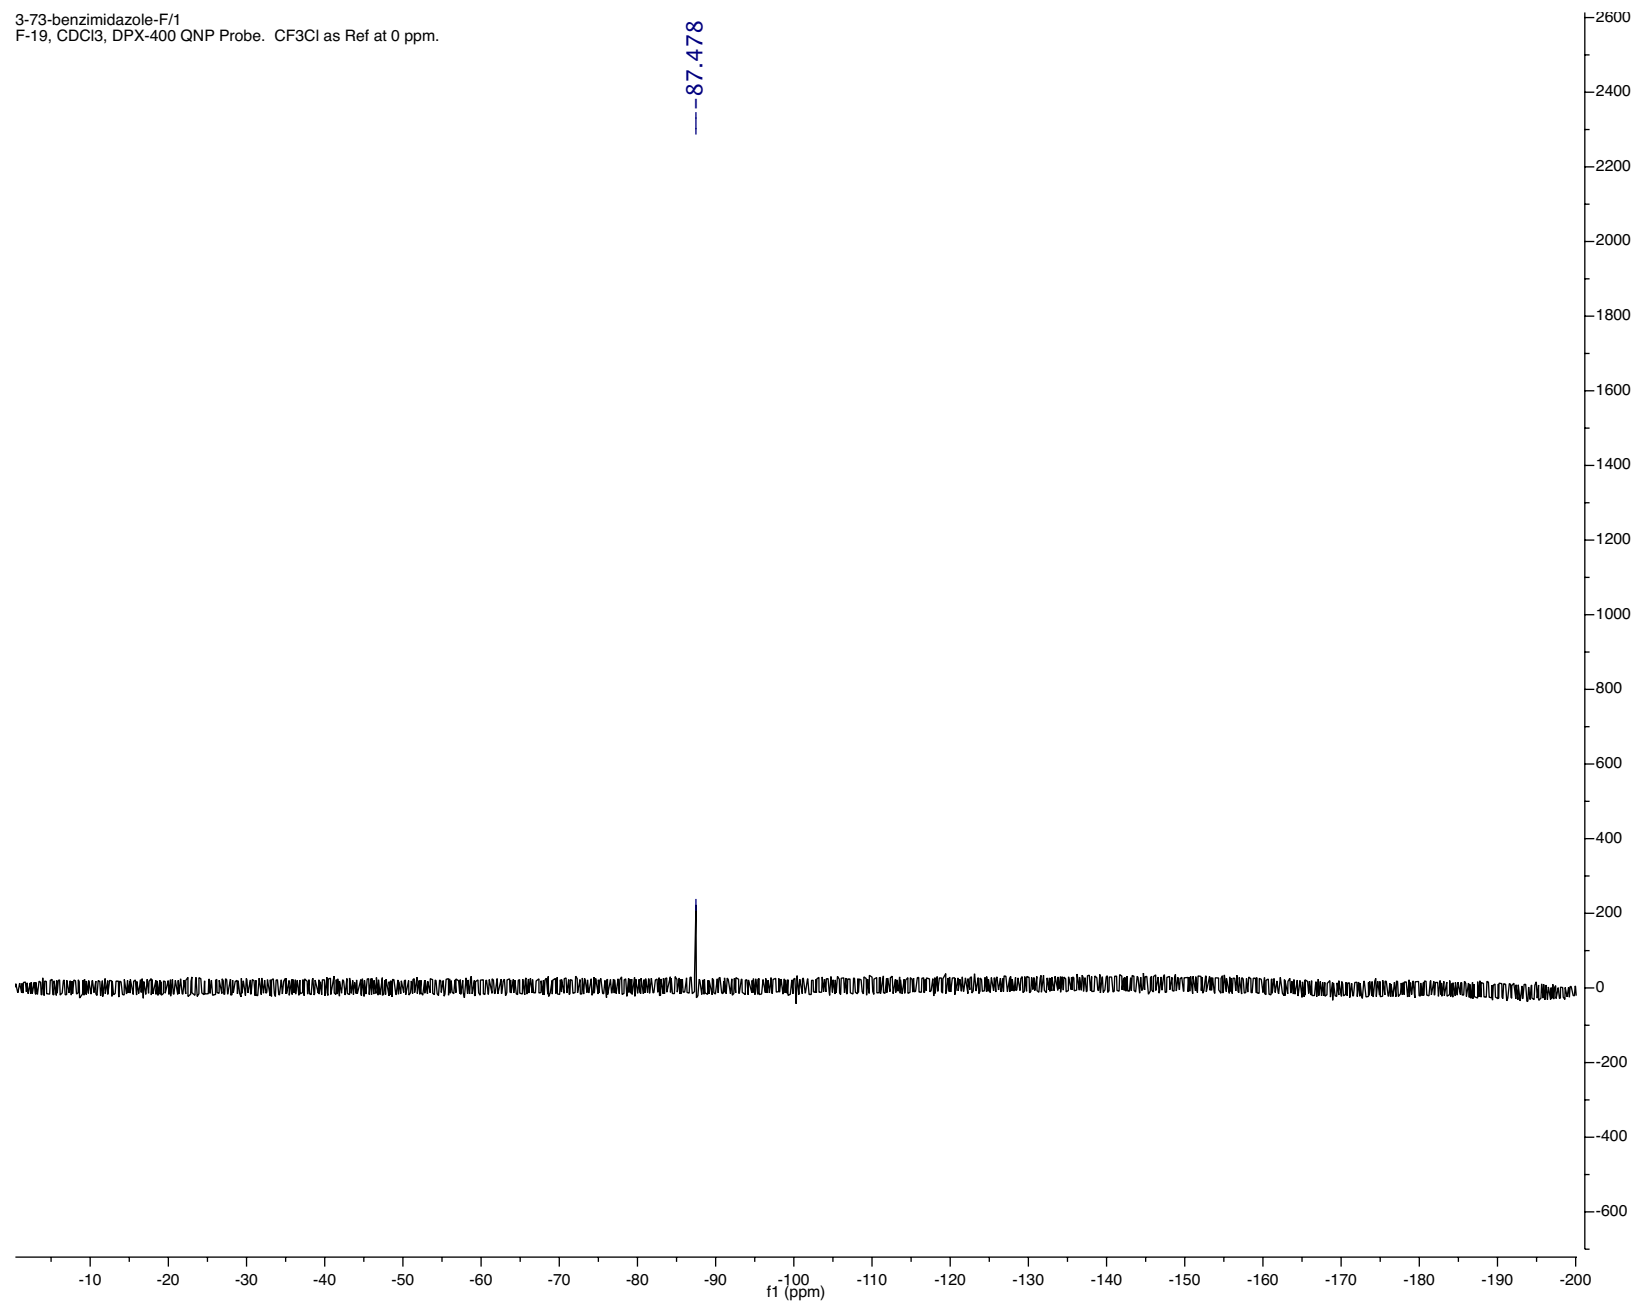

SI-98

3-85-2-1-H/1  
H-1 Routine 1D experiment. BBO probe, 90 MHz

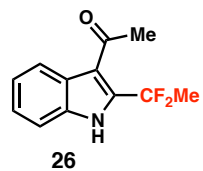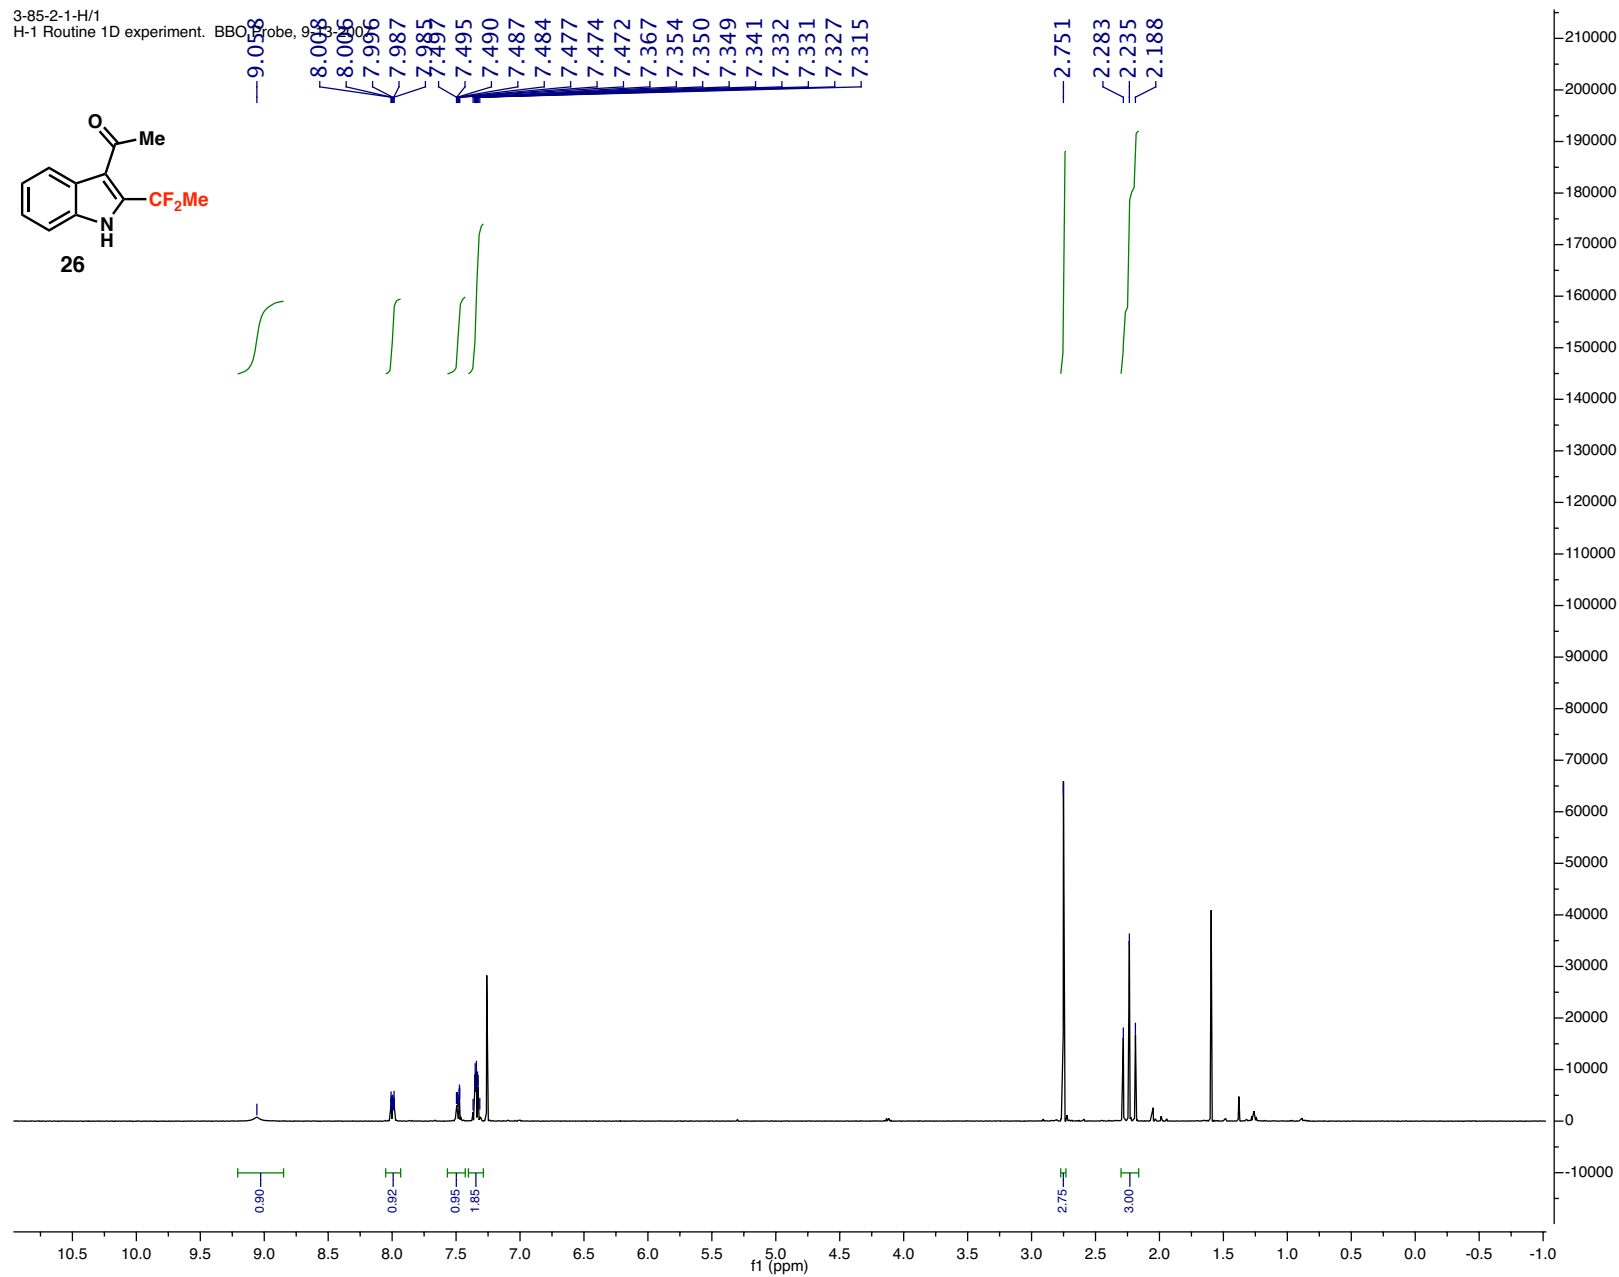

3-85-2-p-13C-re/1  
C-13 Routine 1D, DCH C13 Probe, 10-26-2006

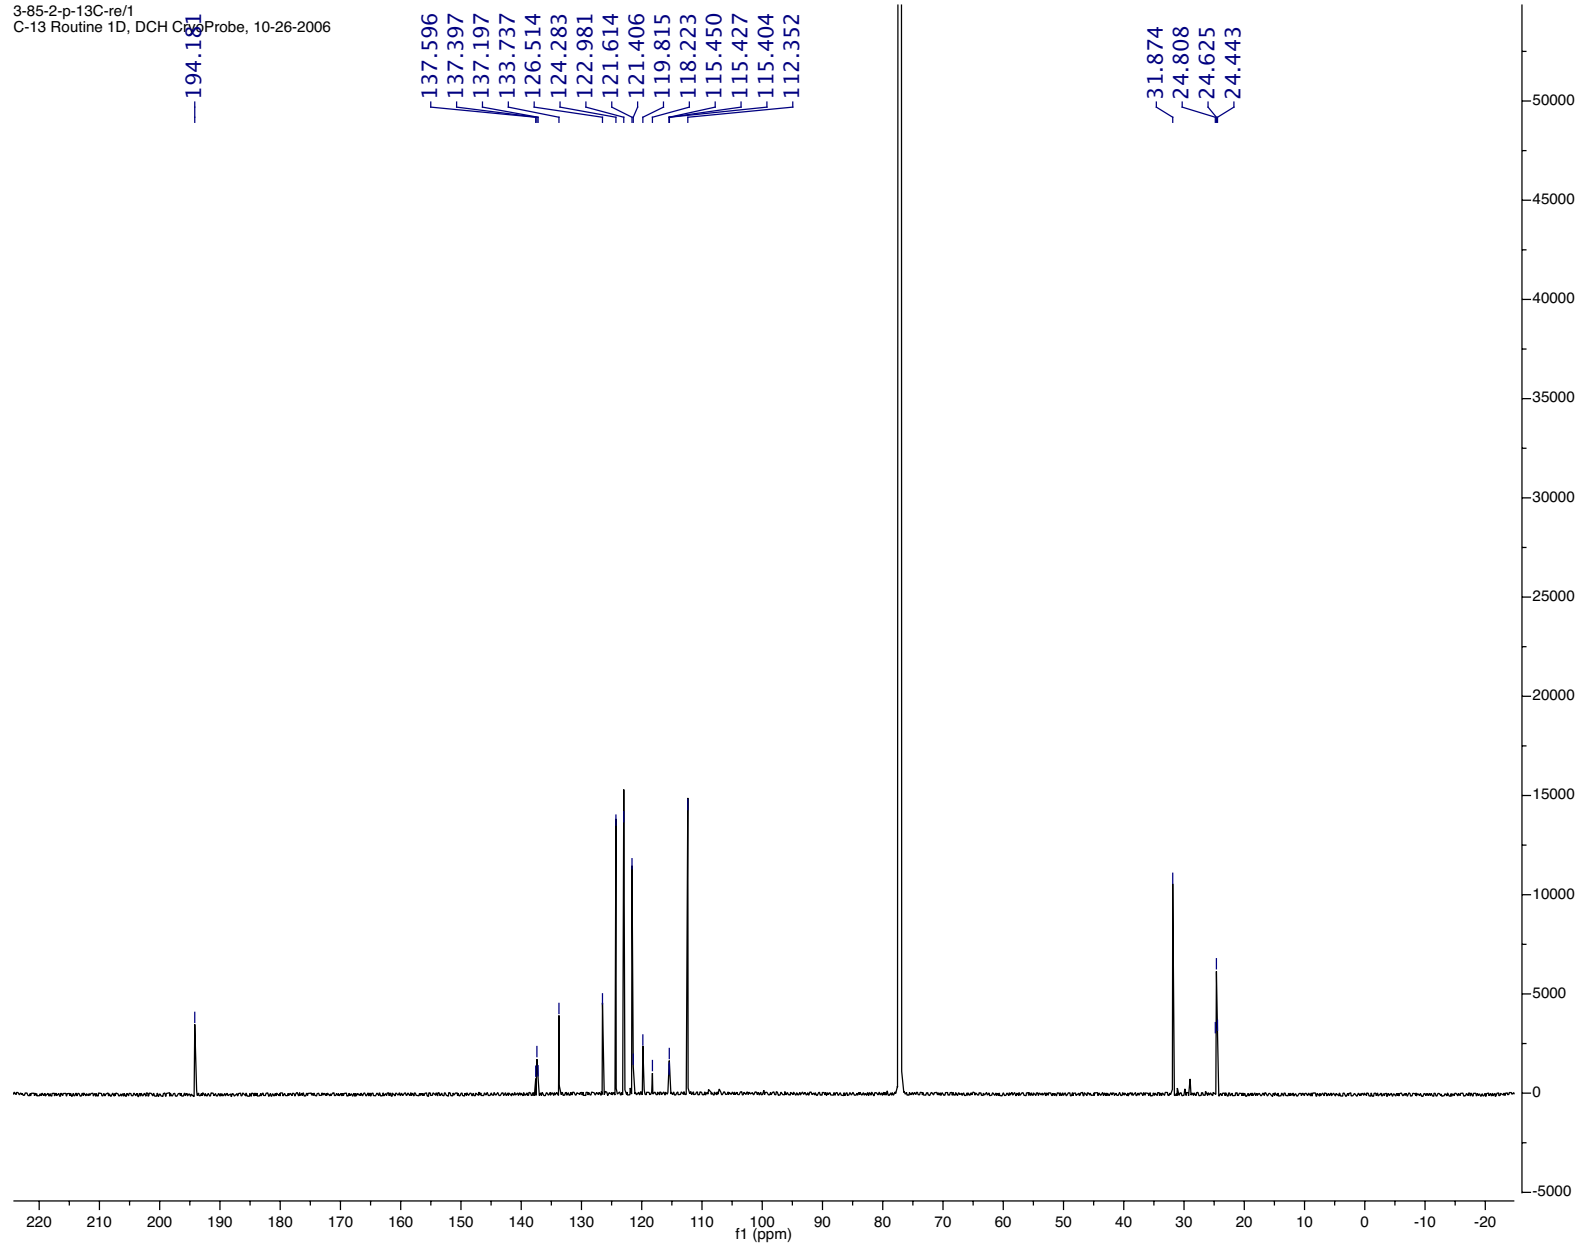

SI-100

3-85-2-p-F-re/1  
F-19, CDCl3, DPX-400 QNP Probe. CF3Cl as Ref at 0 ppm.

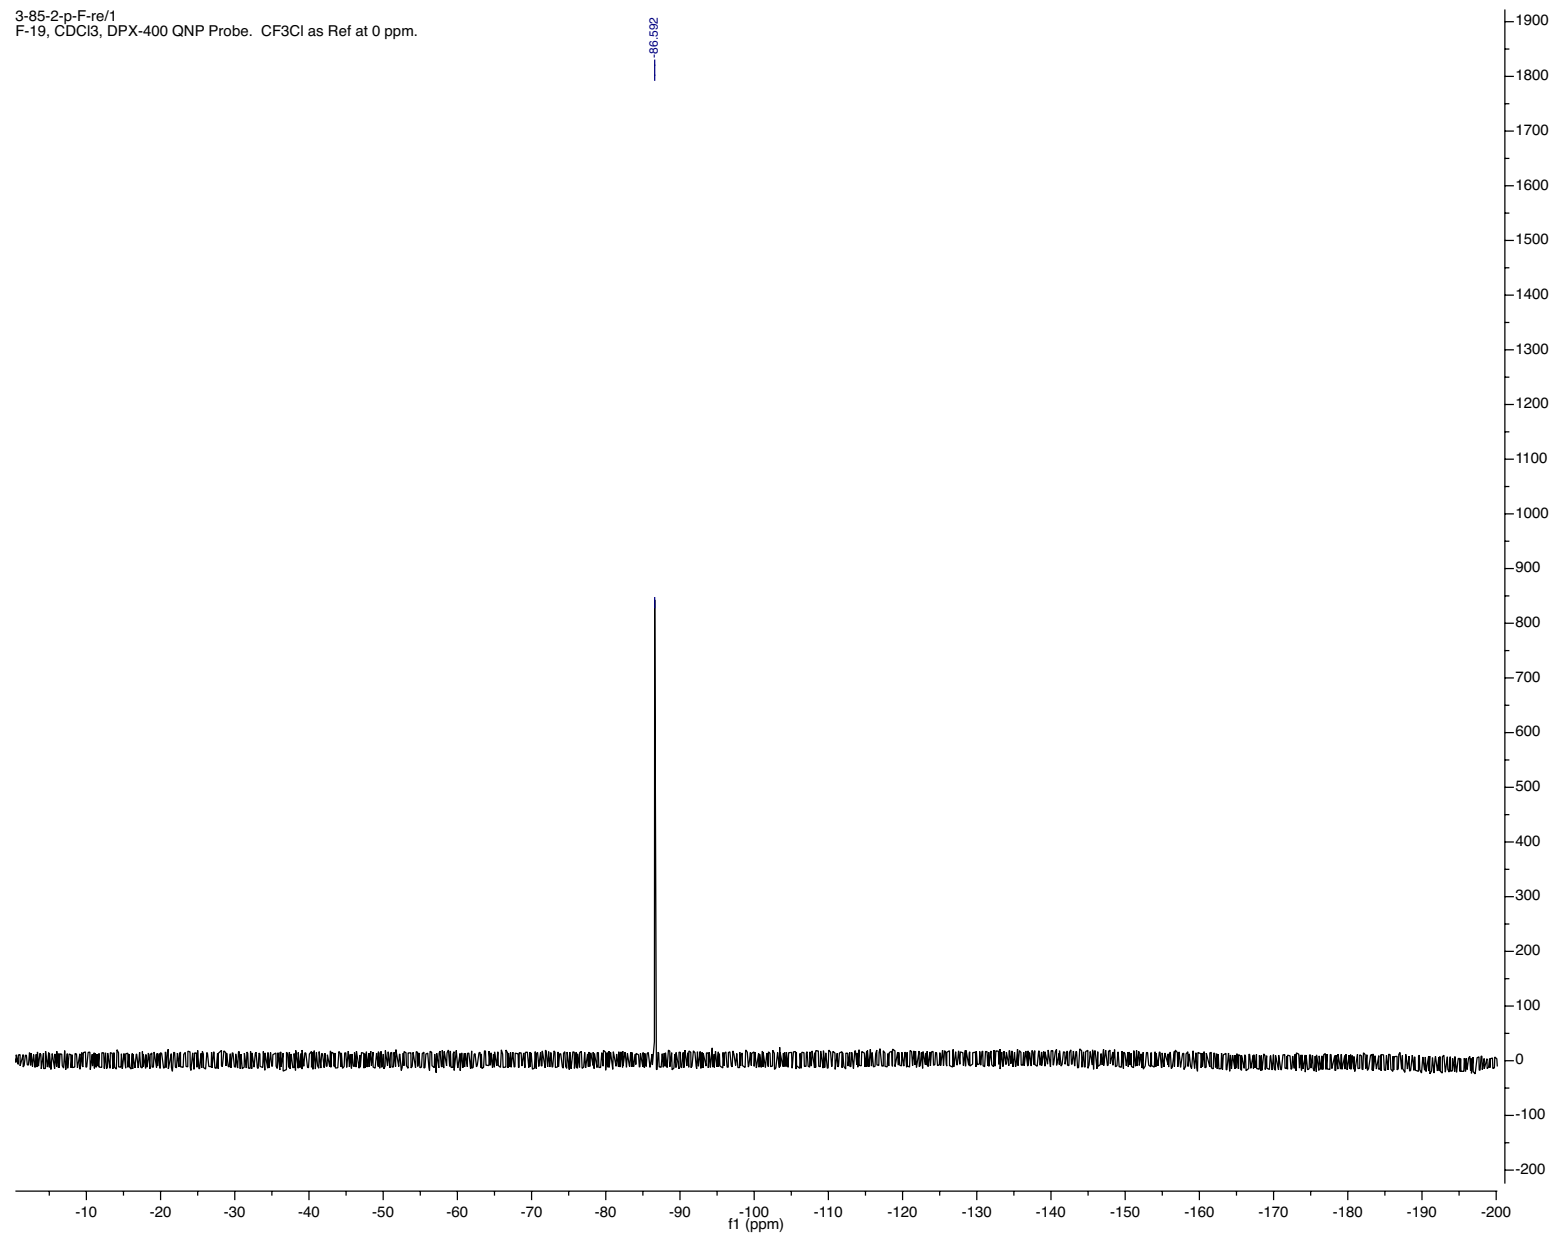

SI-101

3-85-1-2-H/1  
H-1 Routine 1D experiment. BBO Probe, 9-13-2007

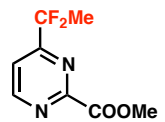

27-C4

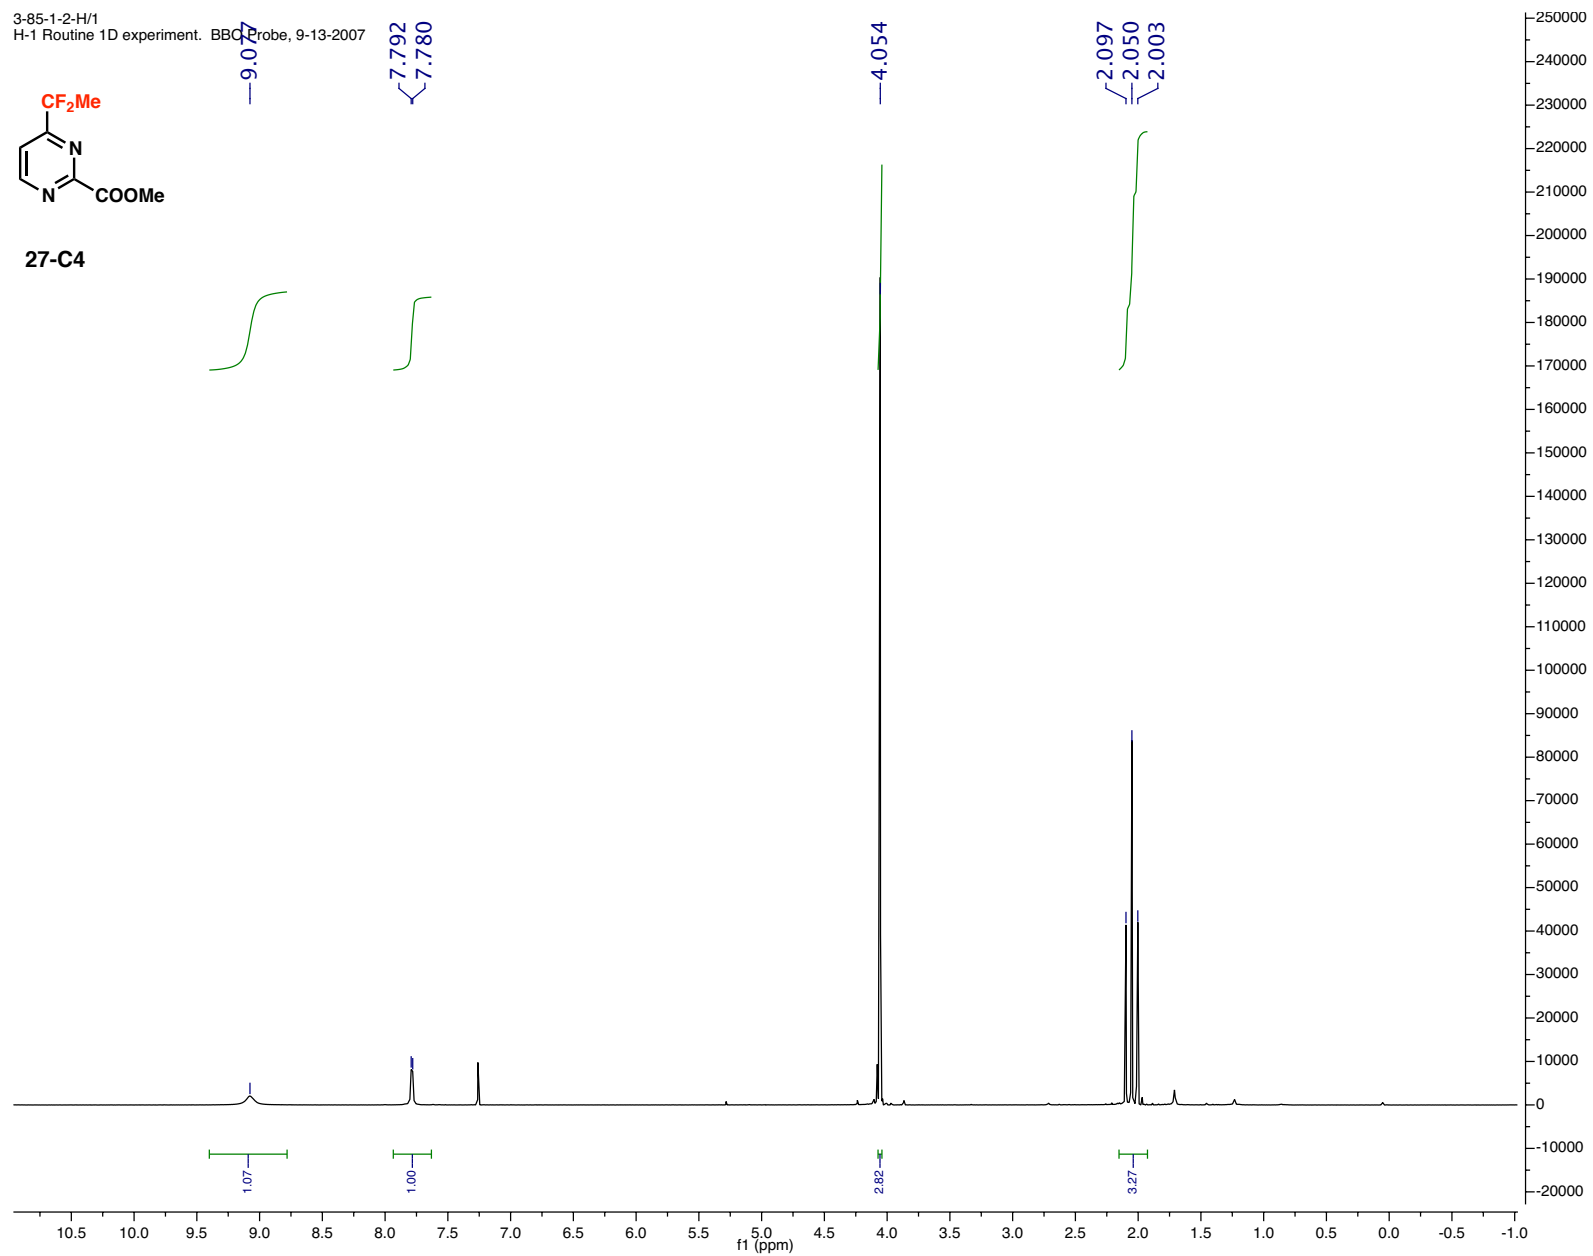

SI-102

3-85-1-2-13C/1  
C-13 Routine 1D, DCH CryoProbe, 10-26-2008

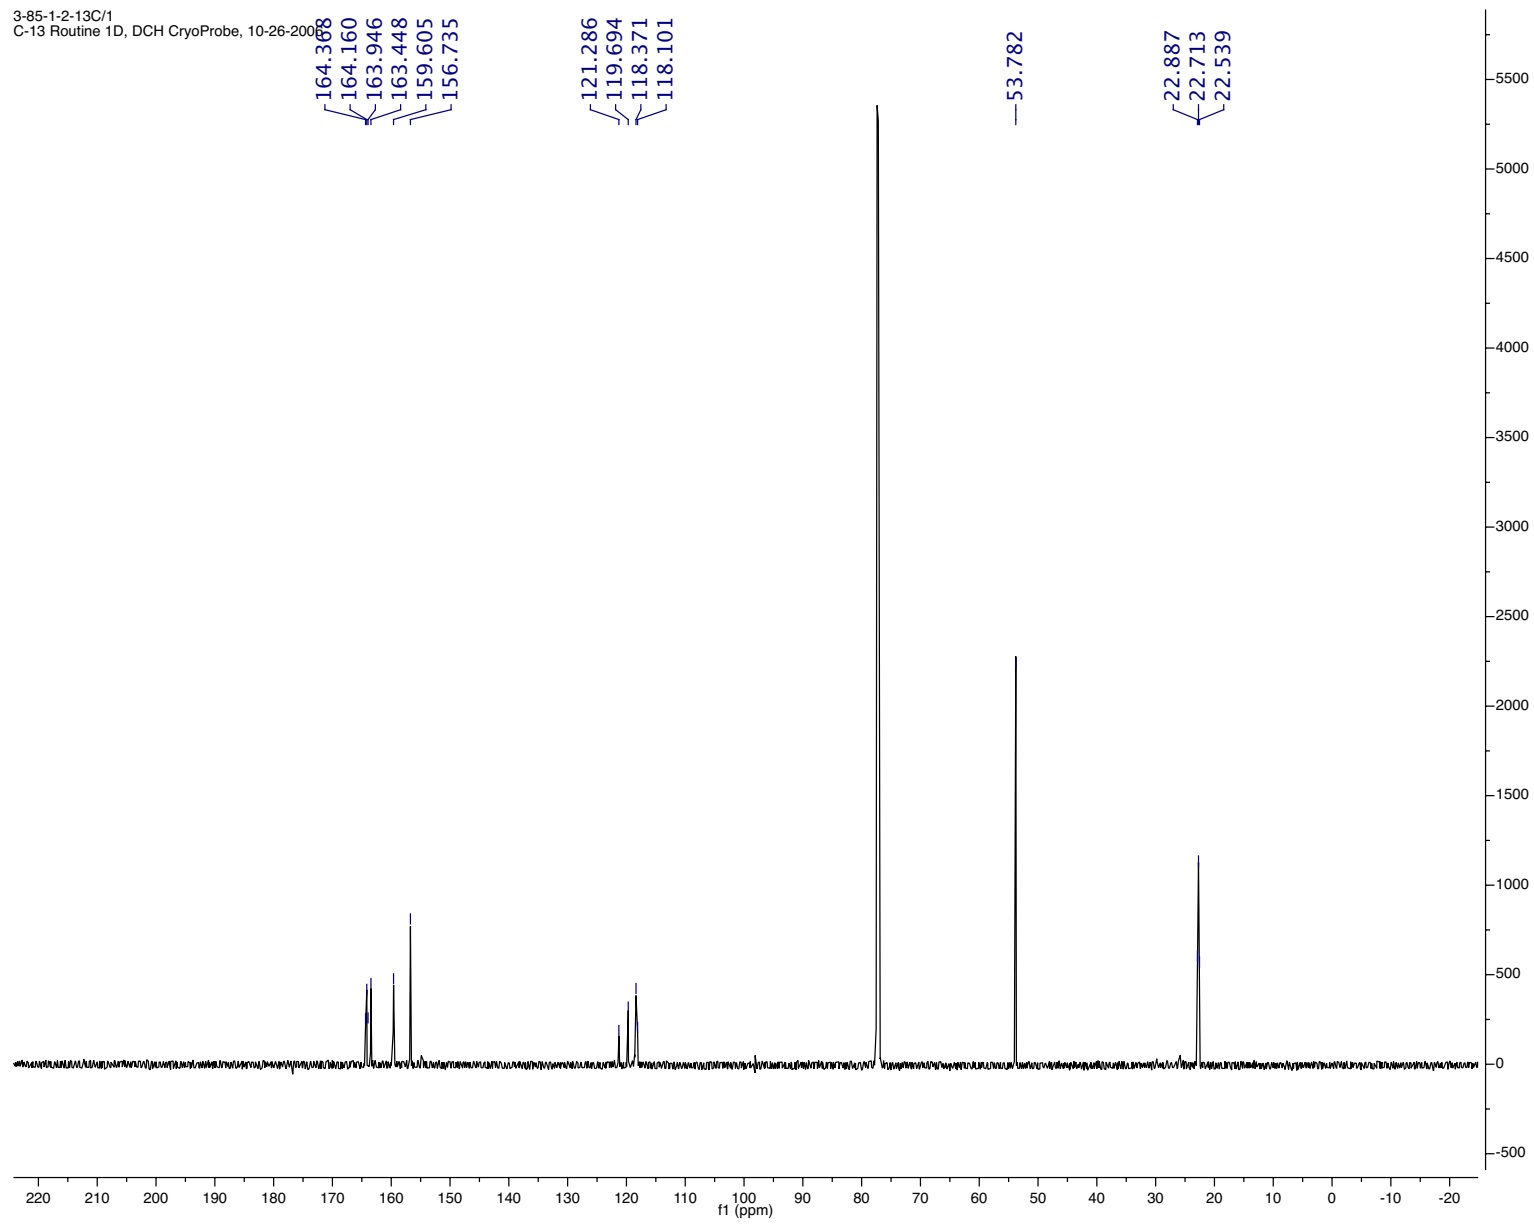

3-85-1-2-F/1  
F-19, CDCl3, DPX-400 QNP Probe. CF3Cl as Ref at 0 ppm.

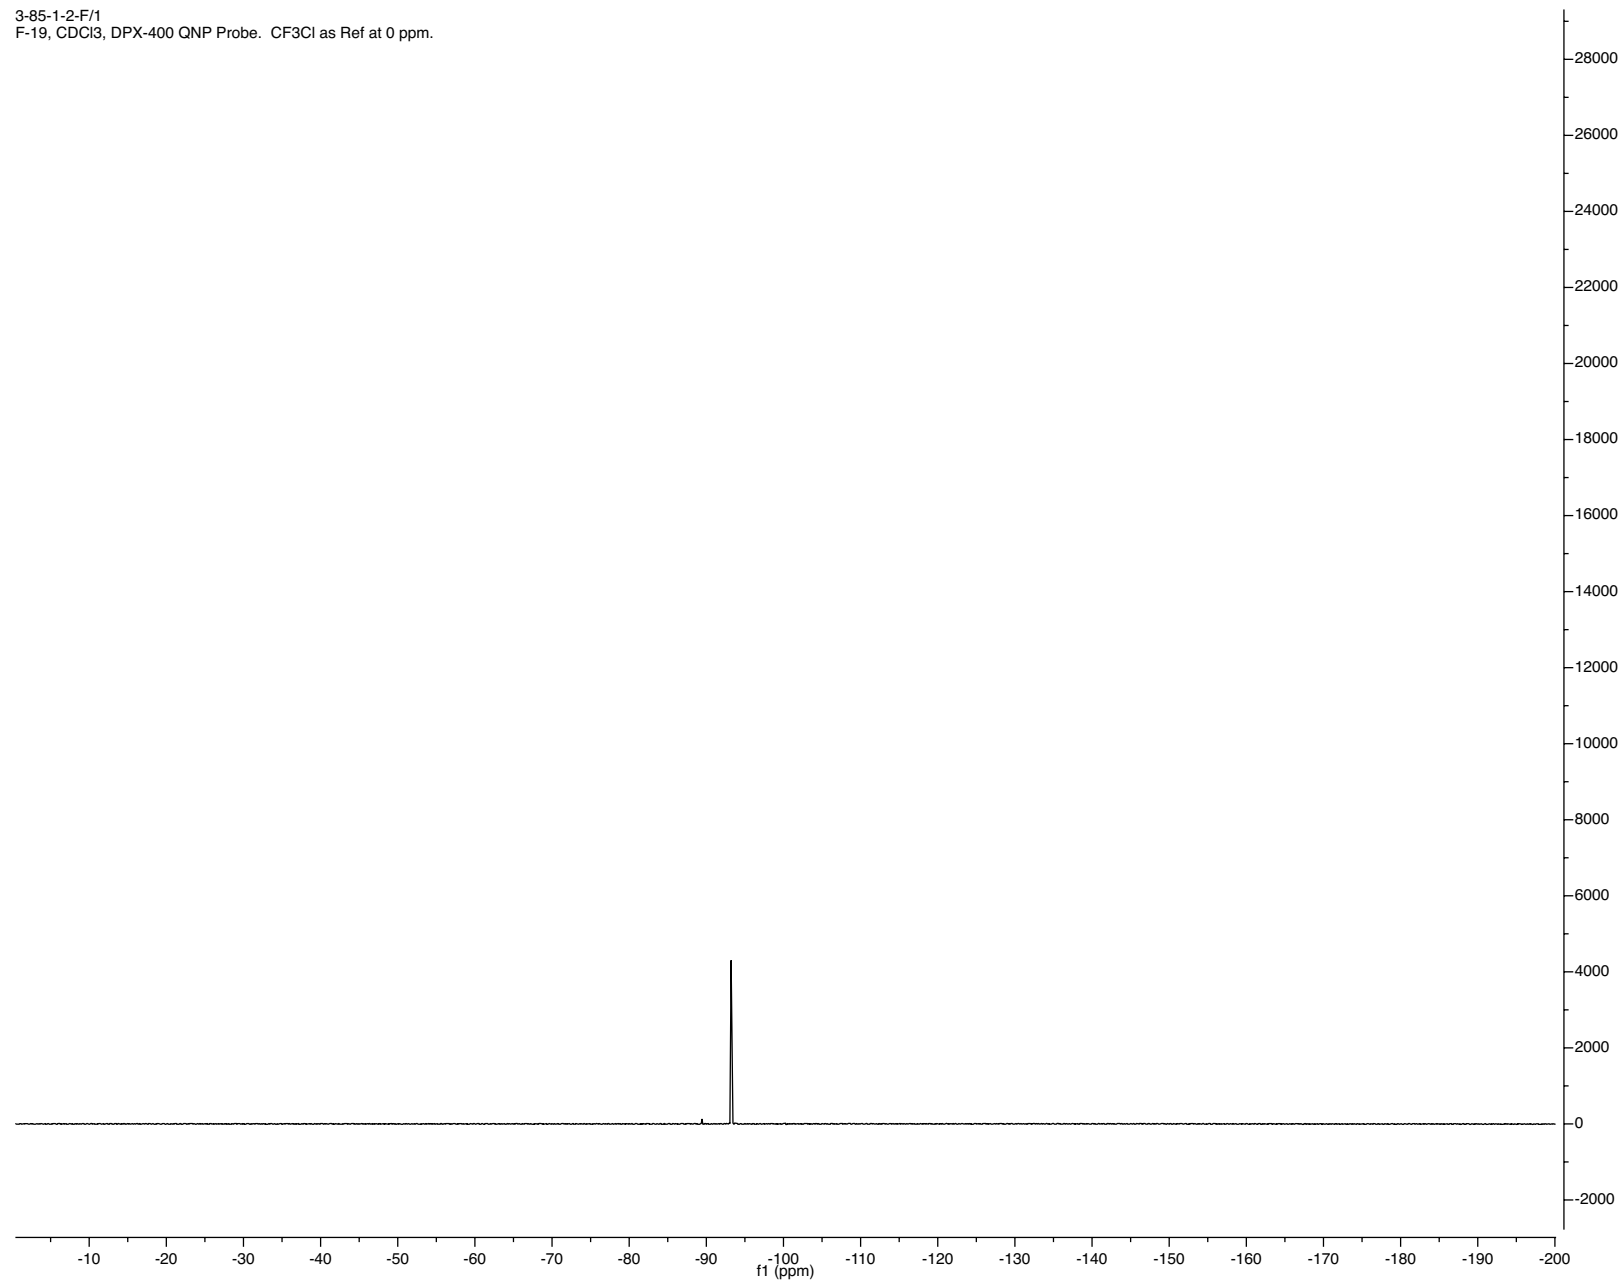

SI-104



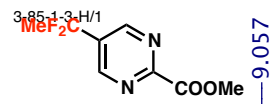

27-C5

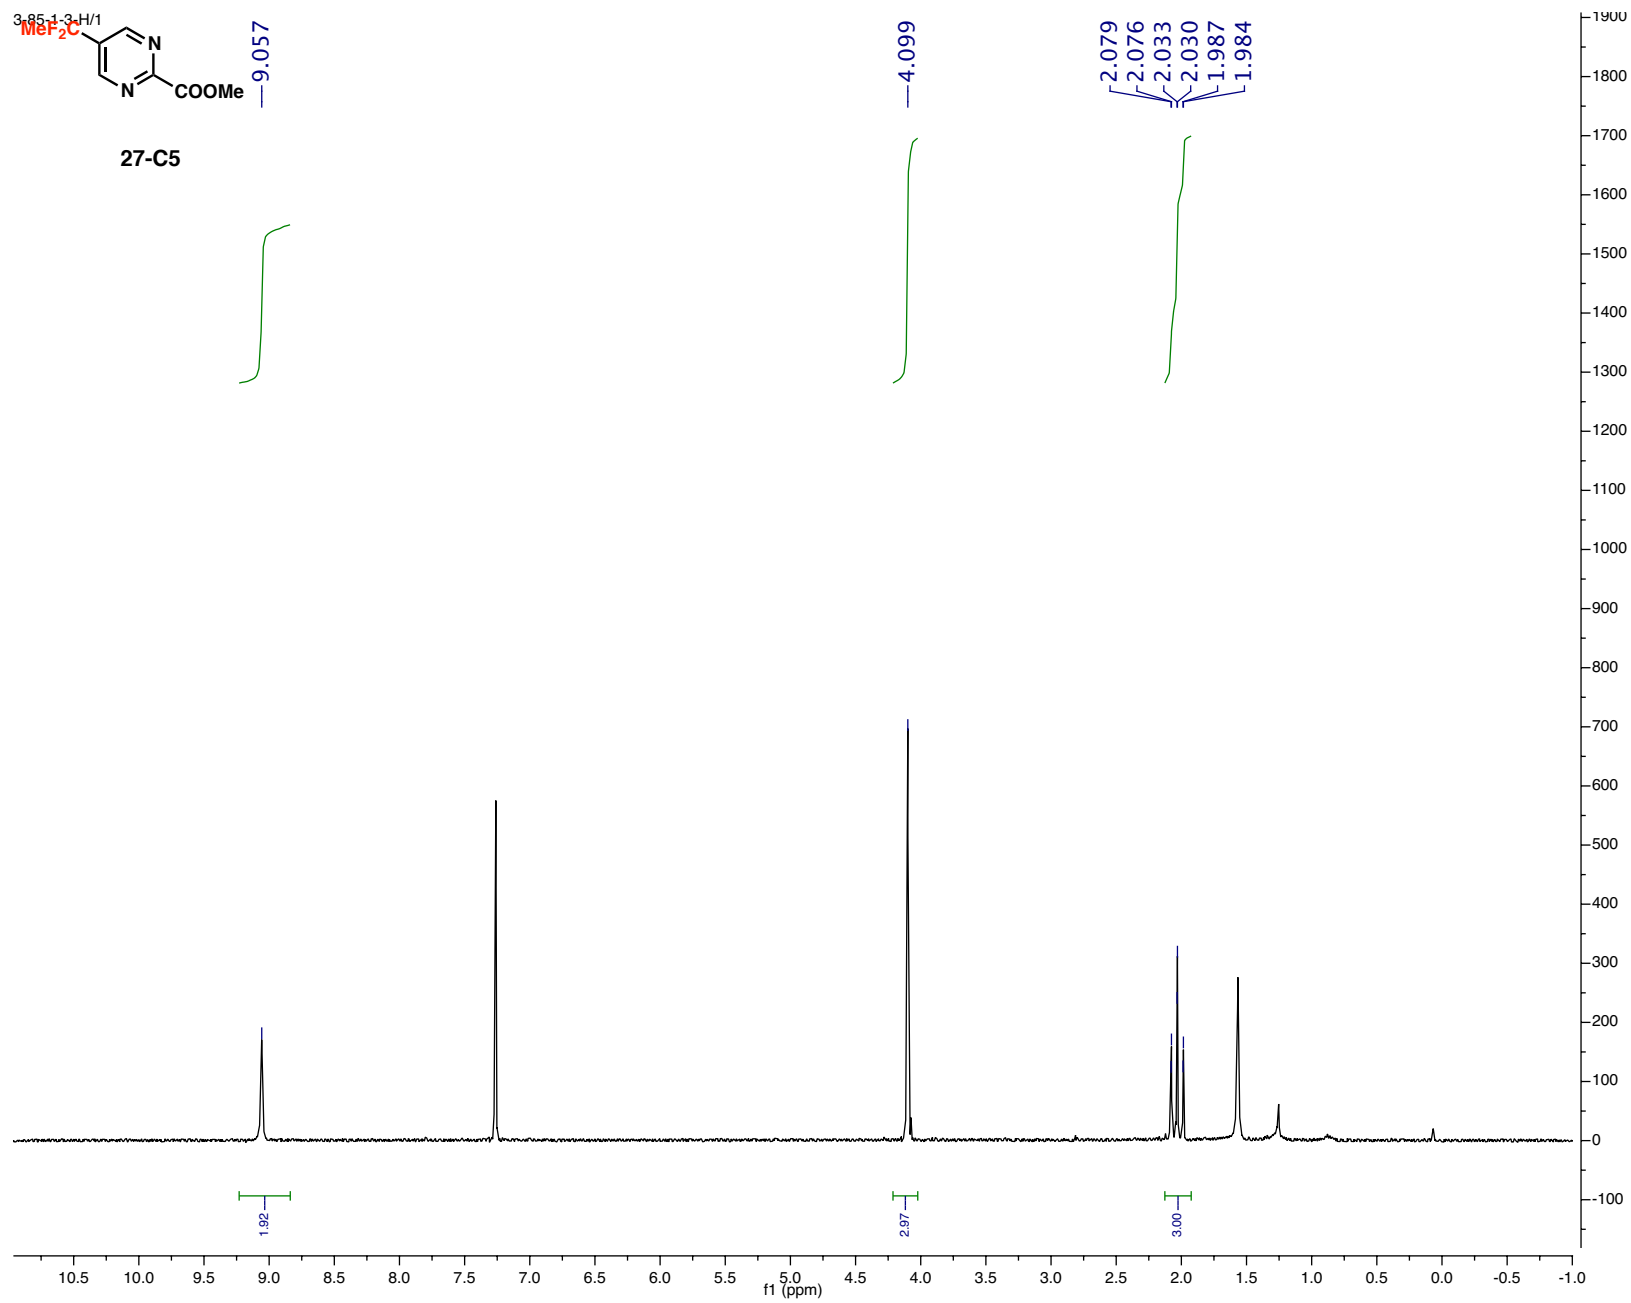

SI-105

3-85-1-3-13C-re/1  
C-13 Routine 1D, DCH CryoProbe, 10-26-2006

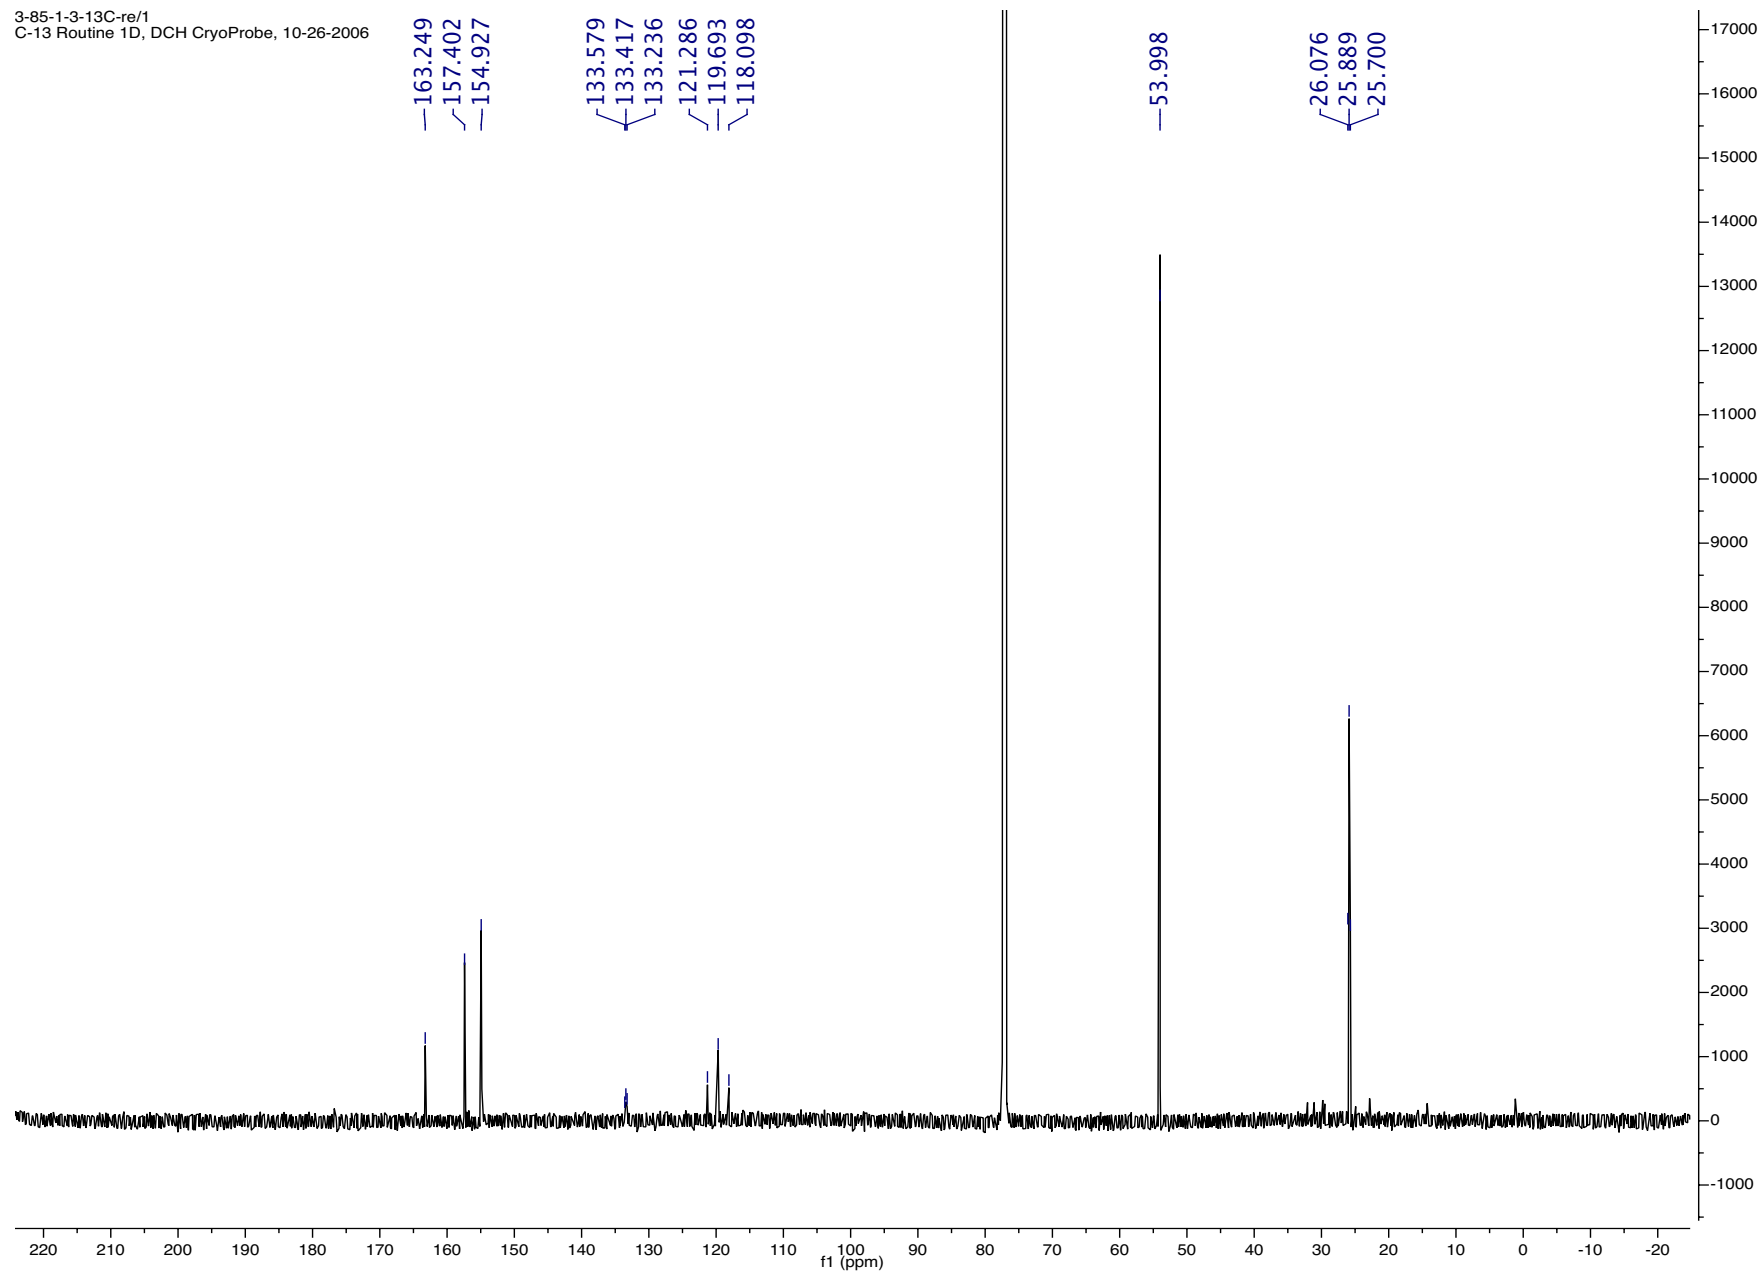

SI-106

3-85-1-3-F/1  
F-19, CDCl<sub>3</sub>, DPX-400 QNP Probe. CF<sub>3</sub>Cl as Ref at 0 ppm.

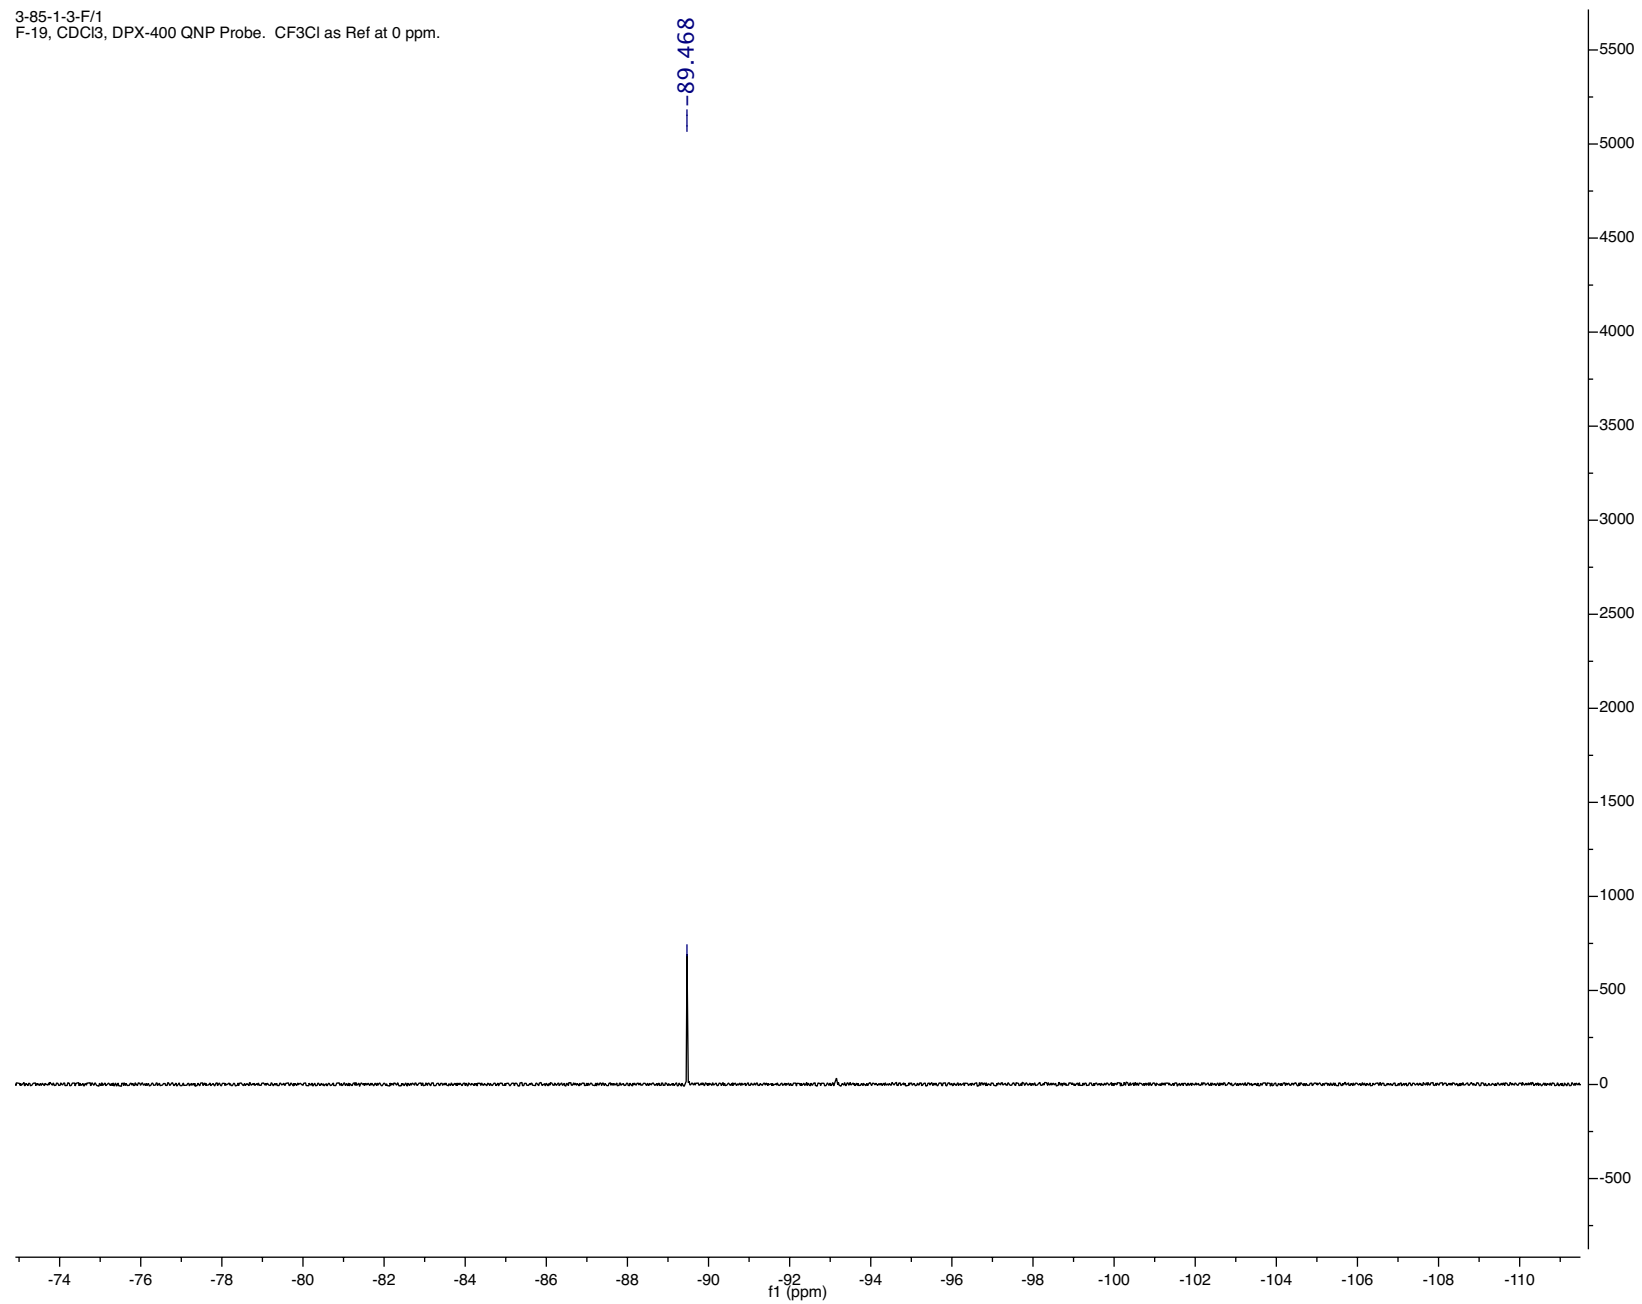

SI-107

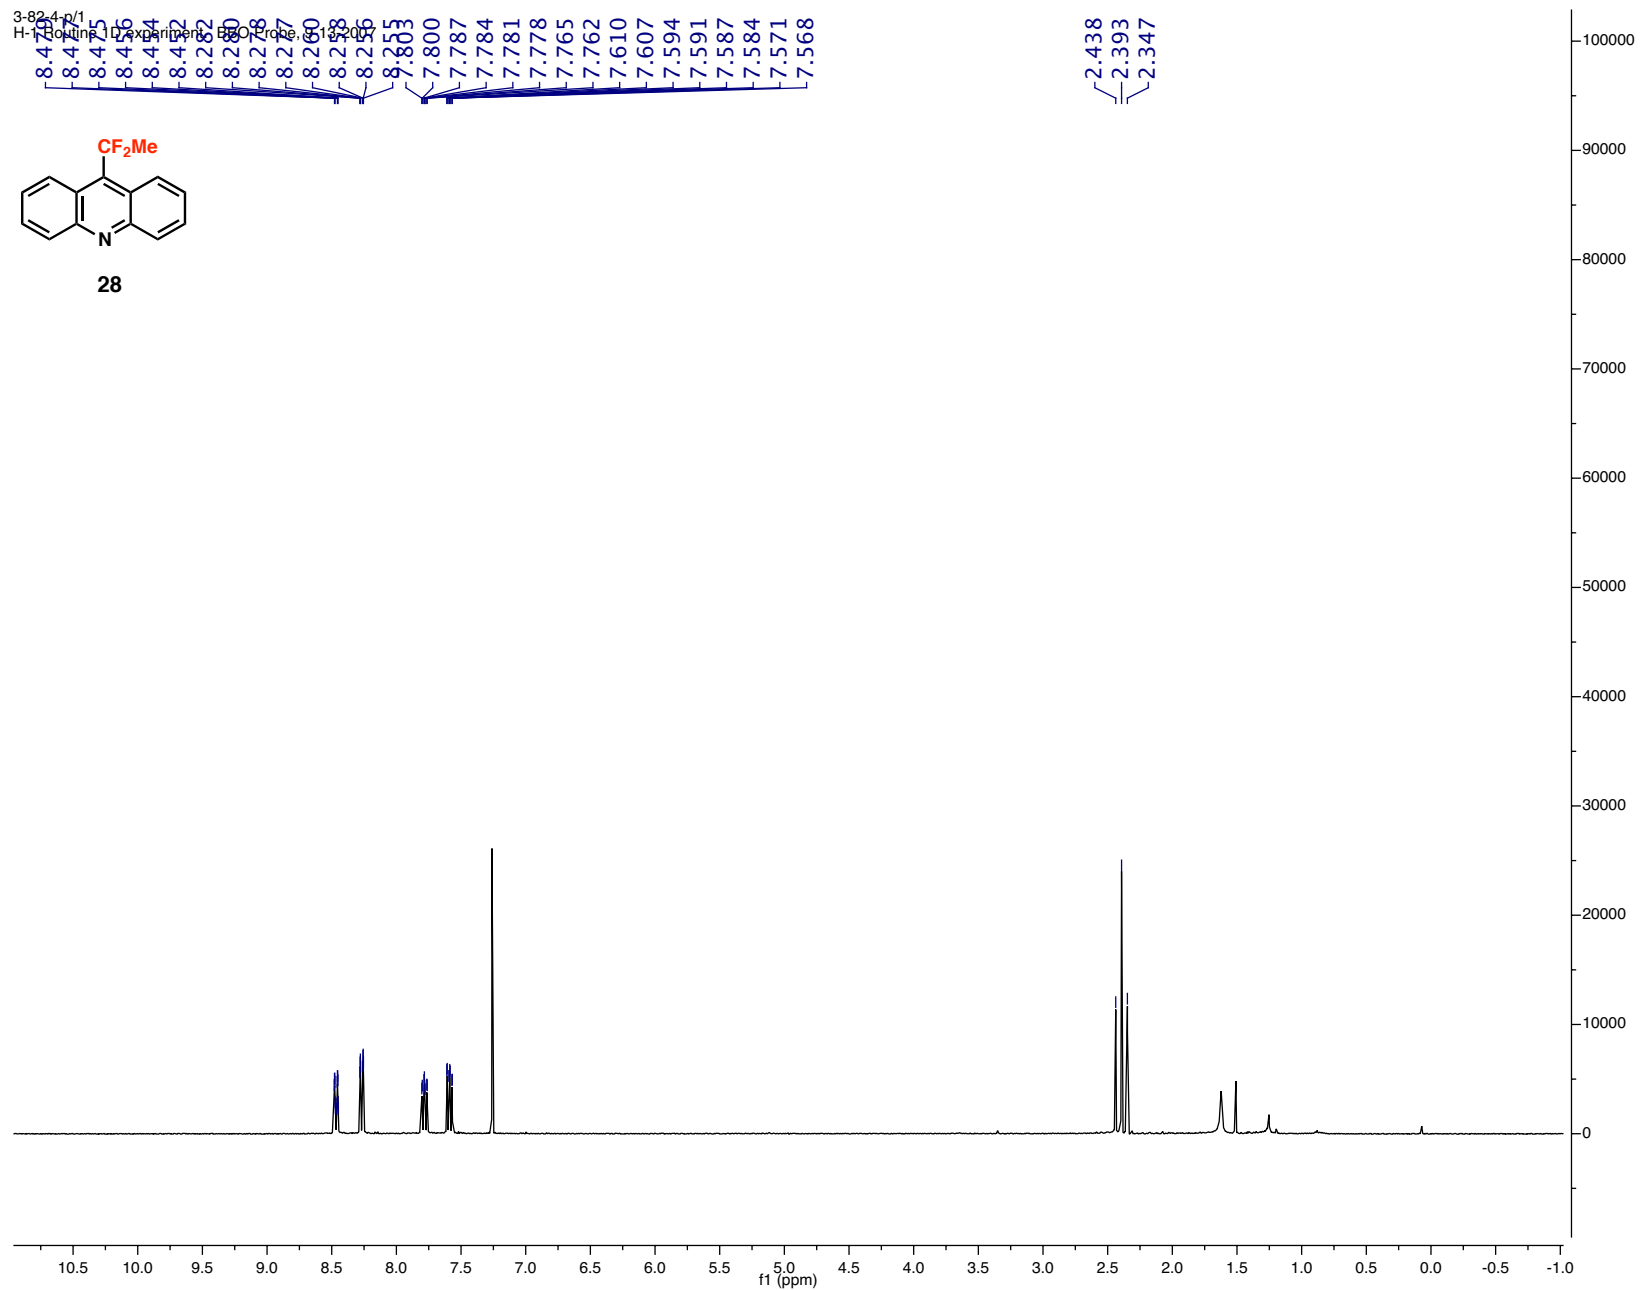

3-82-4-p-13C/1  
C-13 Routine 1D, DCH CryoProbe, 126-903

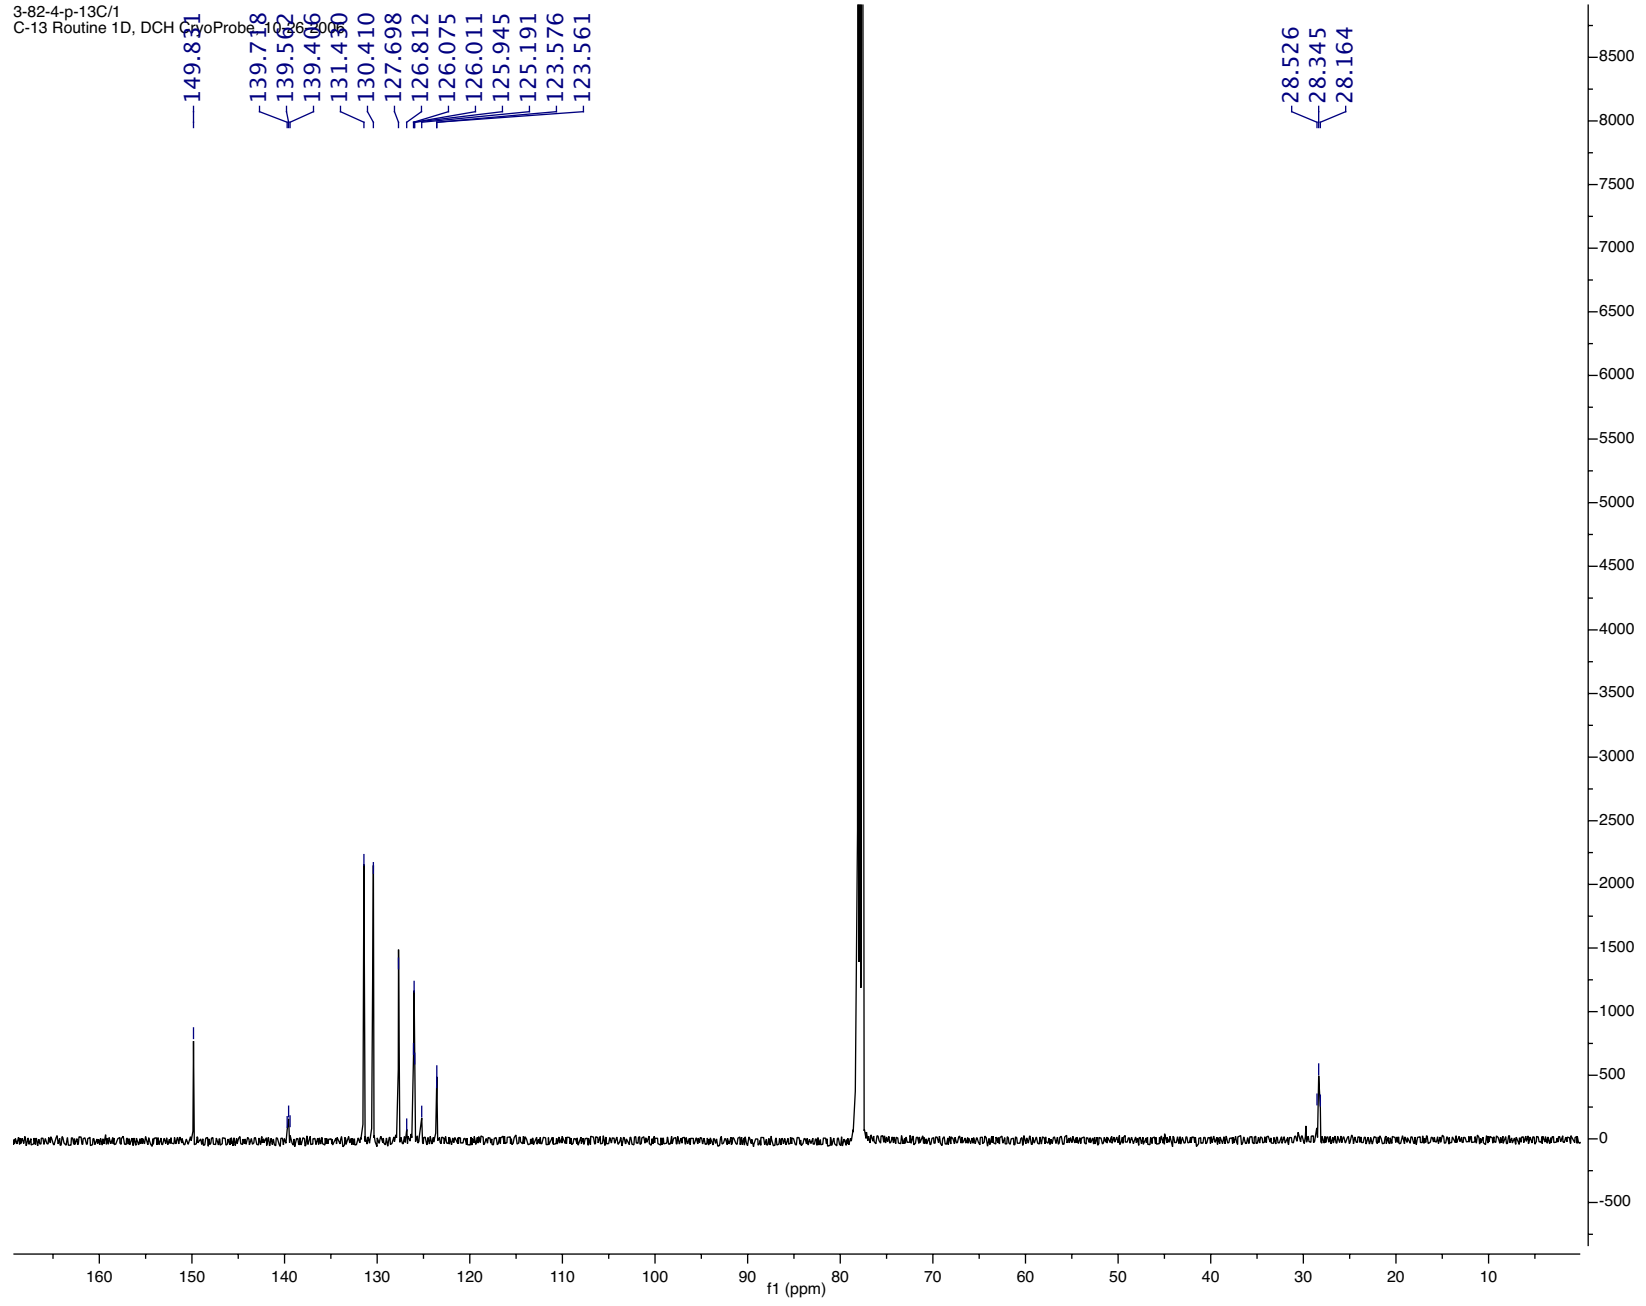

SI-109

3-82-4-P-F/1  
F-19, CDCl<sub>3</sub>, DPX-400 QNP Probe. CF<sub>3</sub>Cl as Ref at 0 ppm.

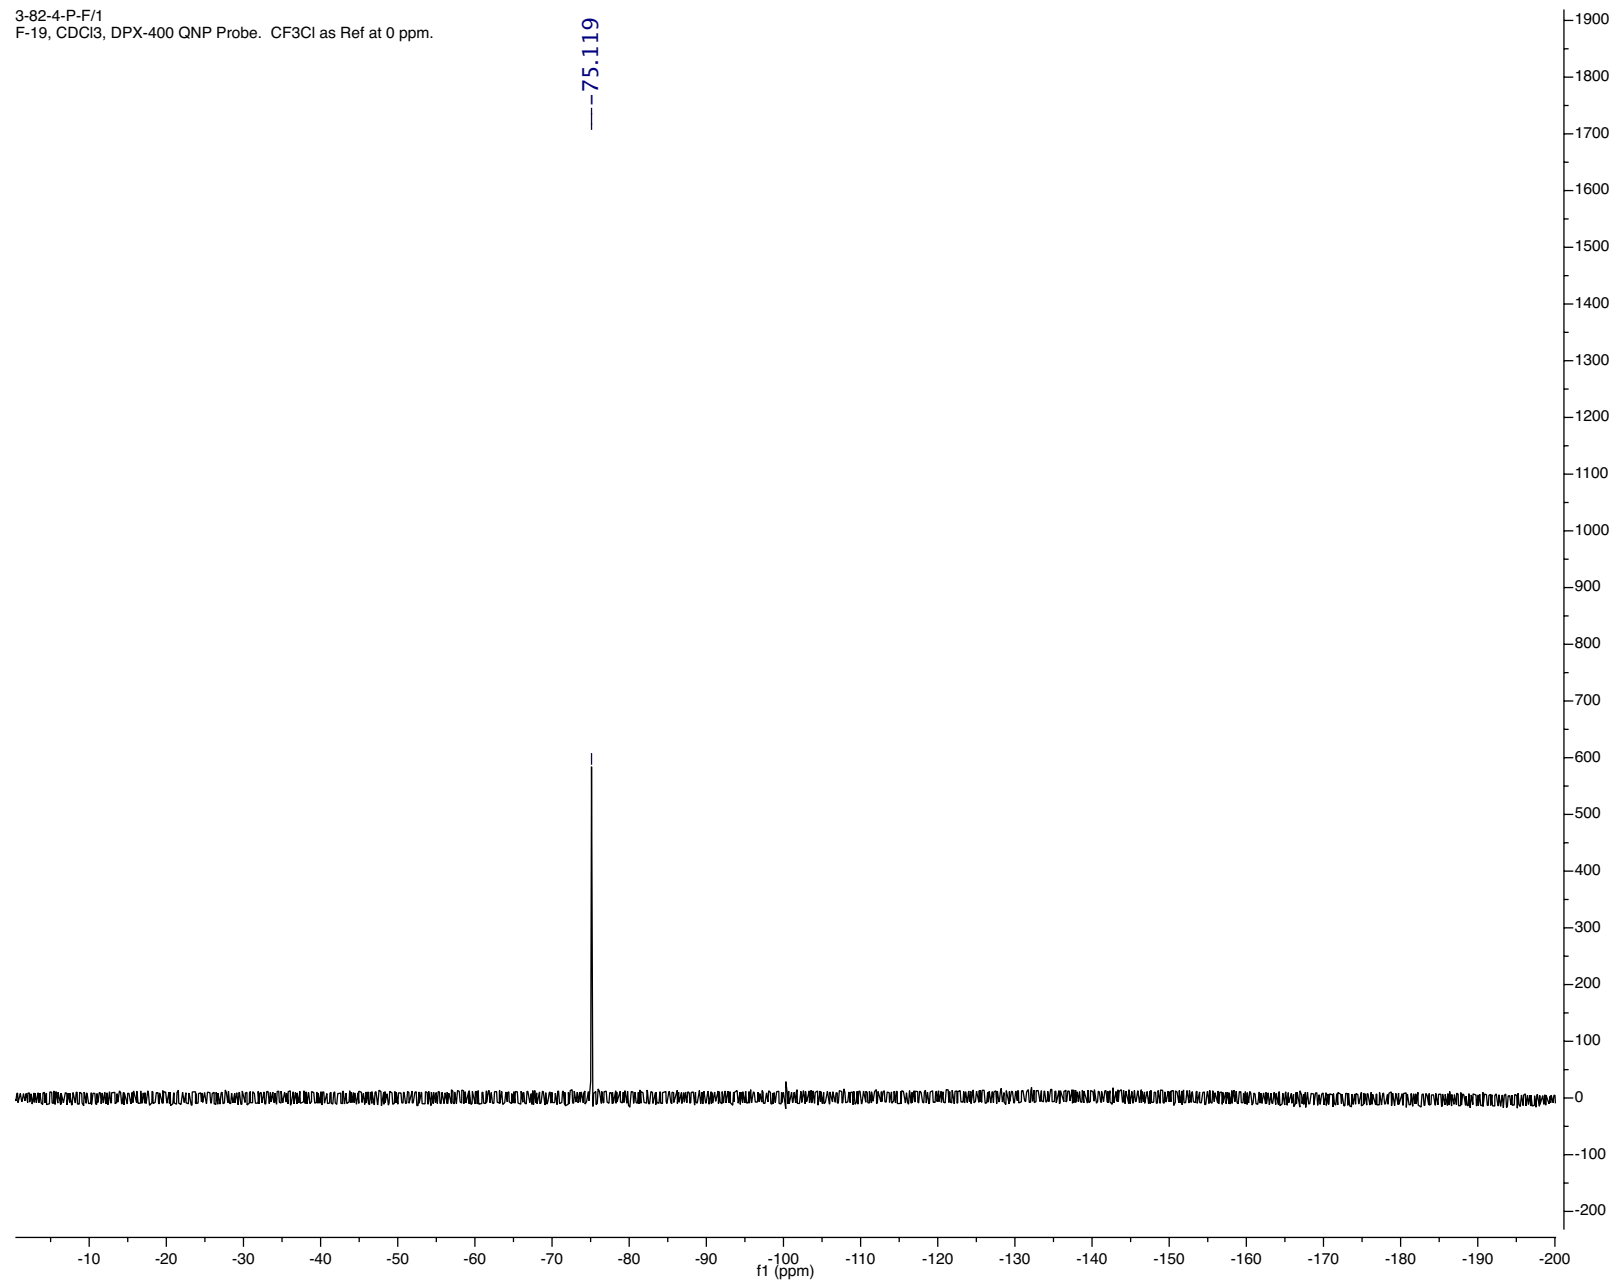

SI-110

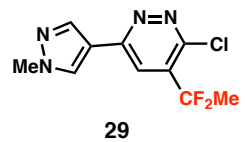

8.146  
8.033  
8.032  
7.728

4.008

2.144  
2.097  
2.051

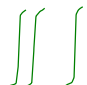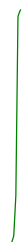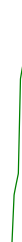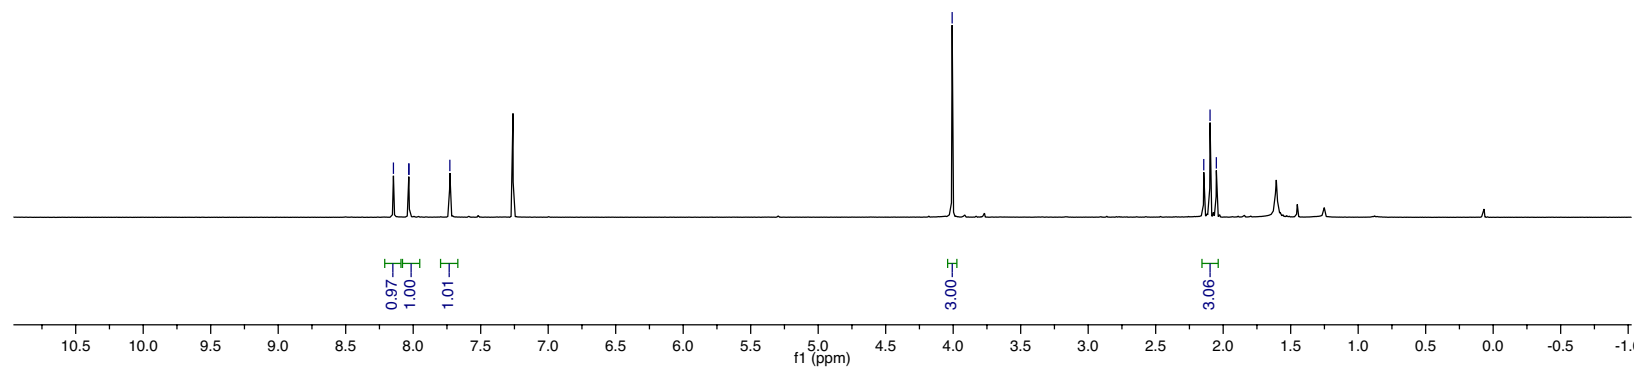

SI-111

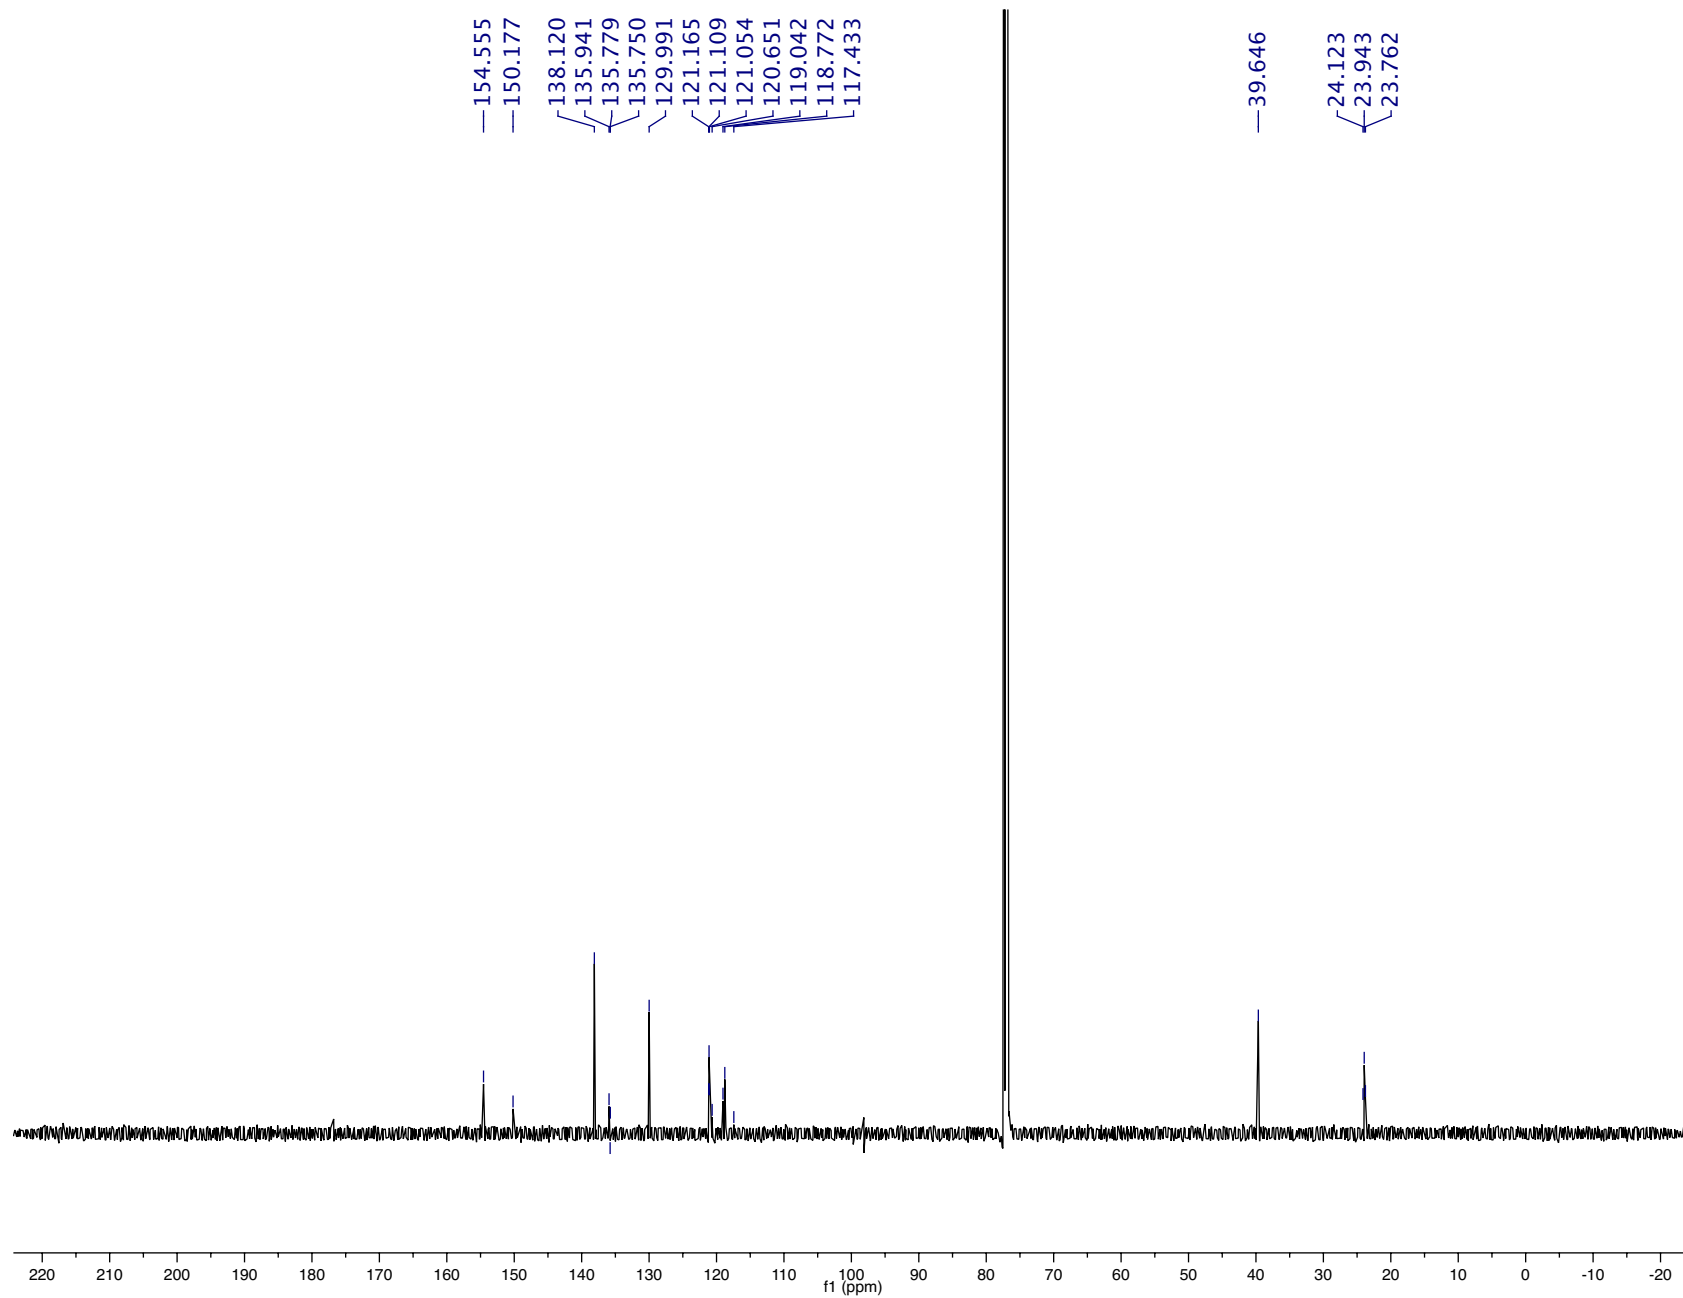

SI-112



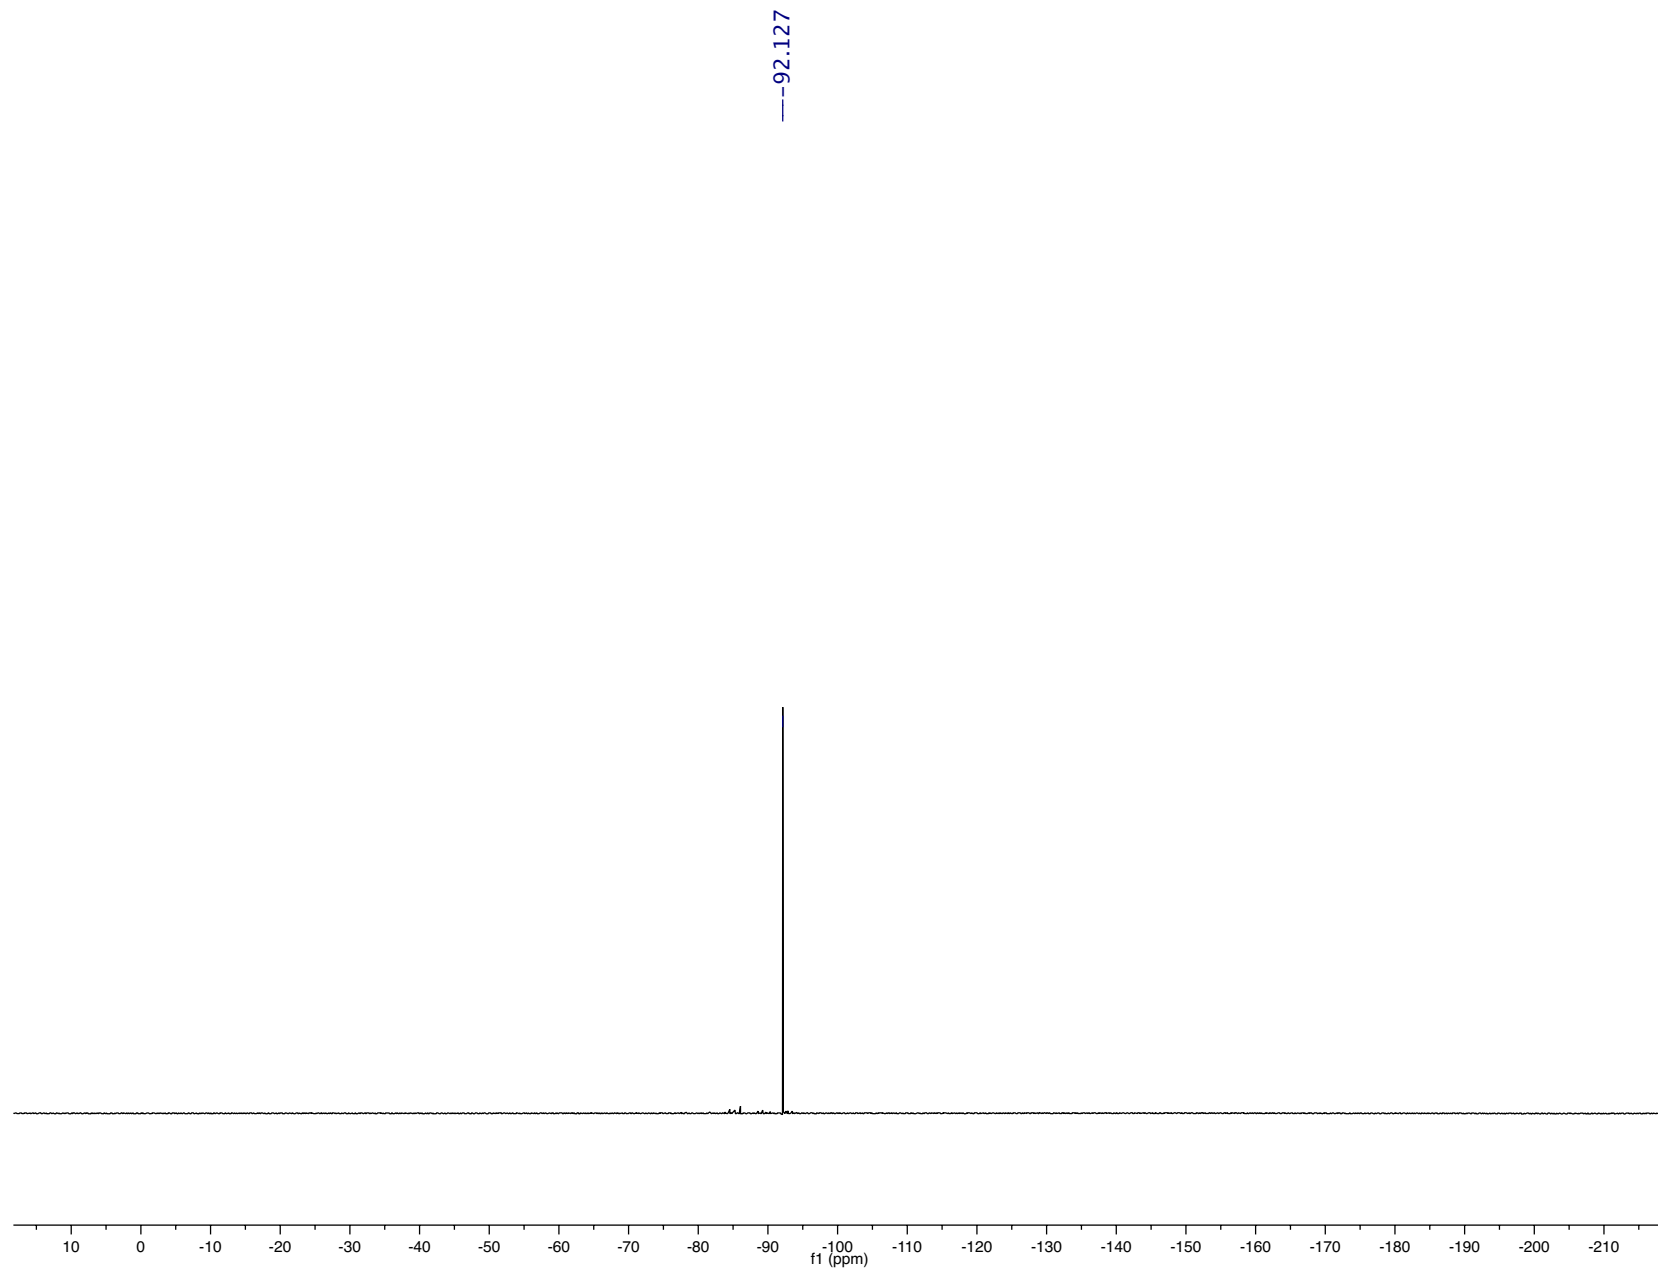

SI-113

3-72-theoline-H-re\_01  
Std proton

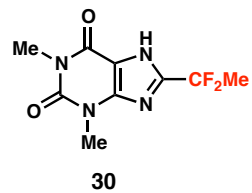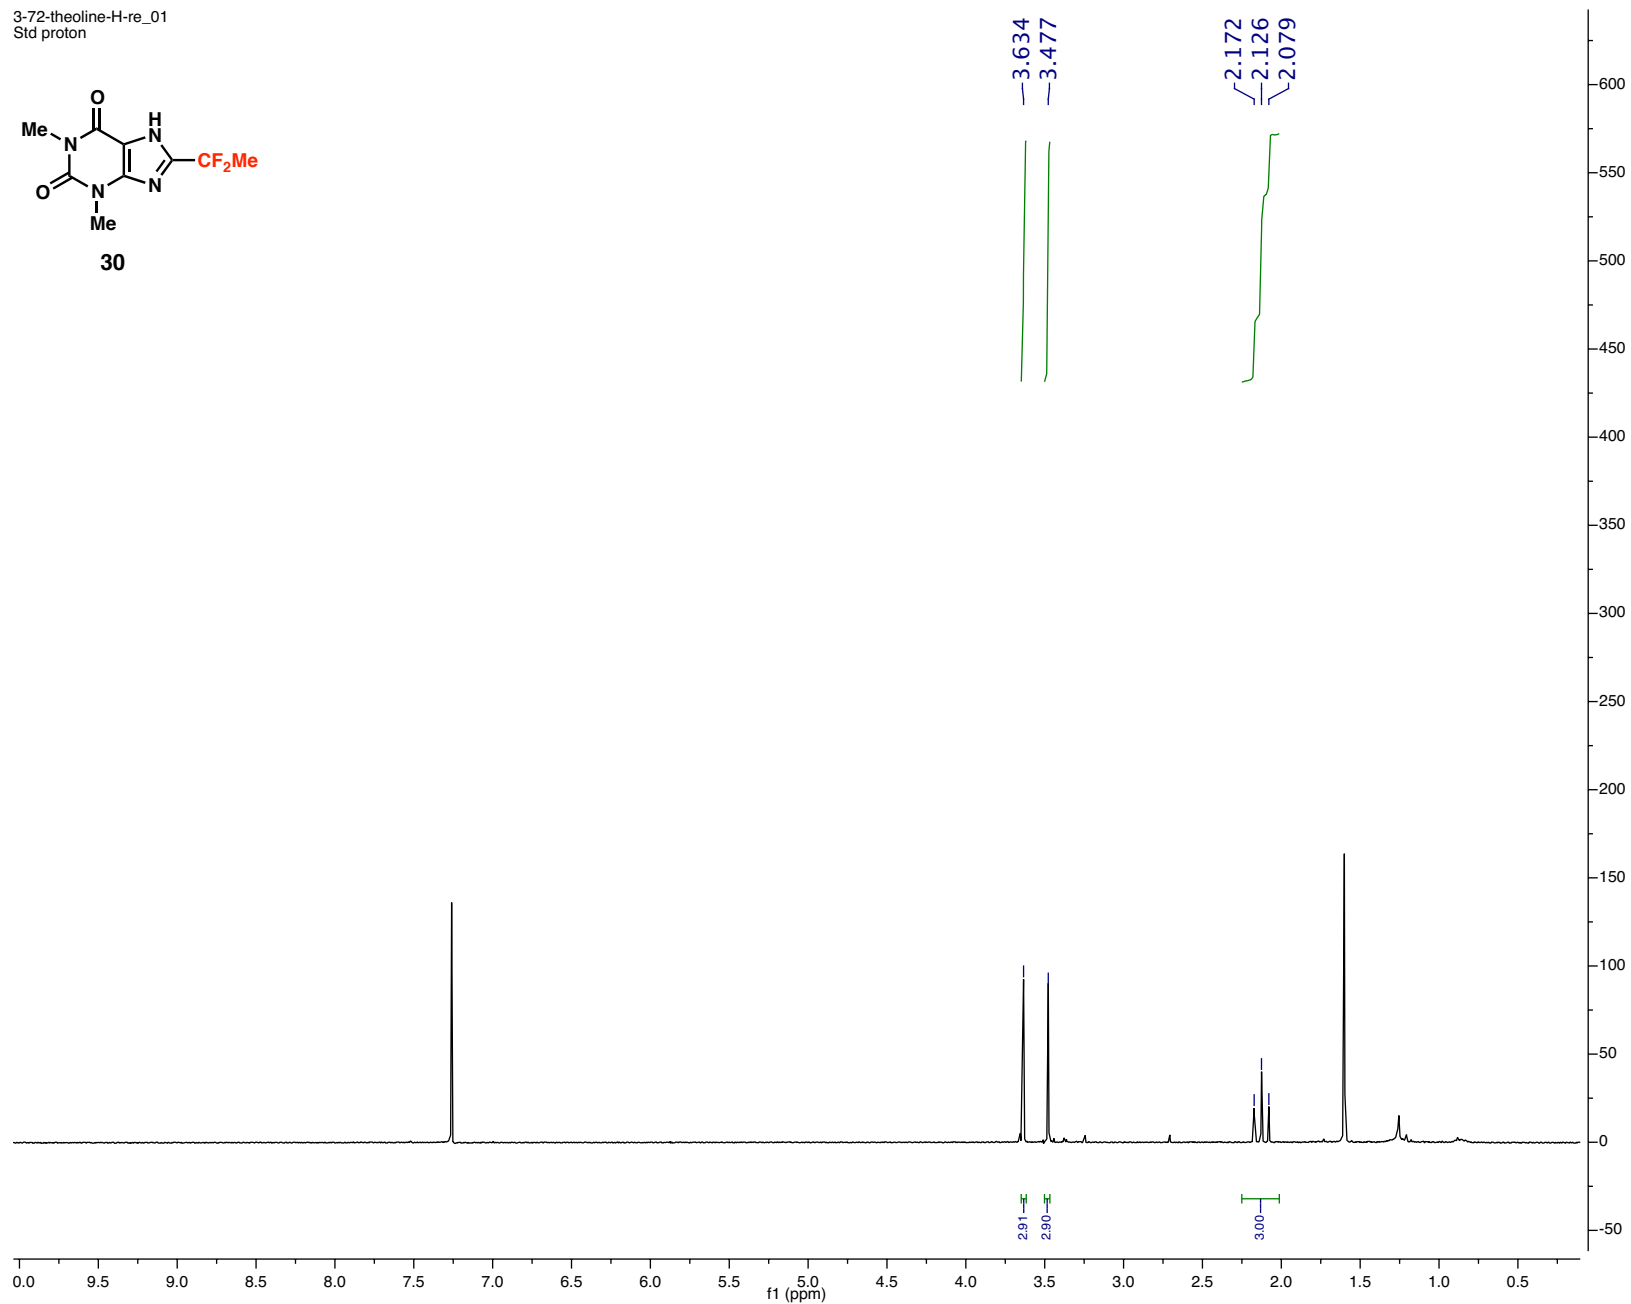

SI-114

3-72-theophylline-crystal-2-13C/1  
C-13 Routine 1D, DCH CryoProbe, 10-26-2006

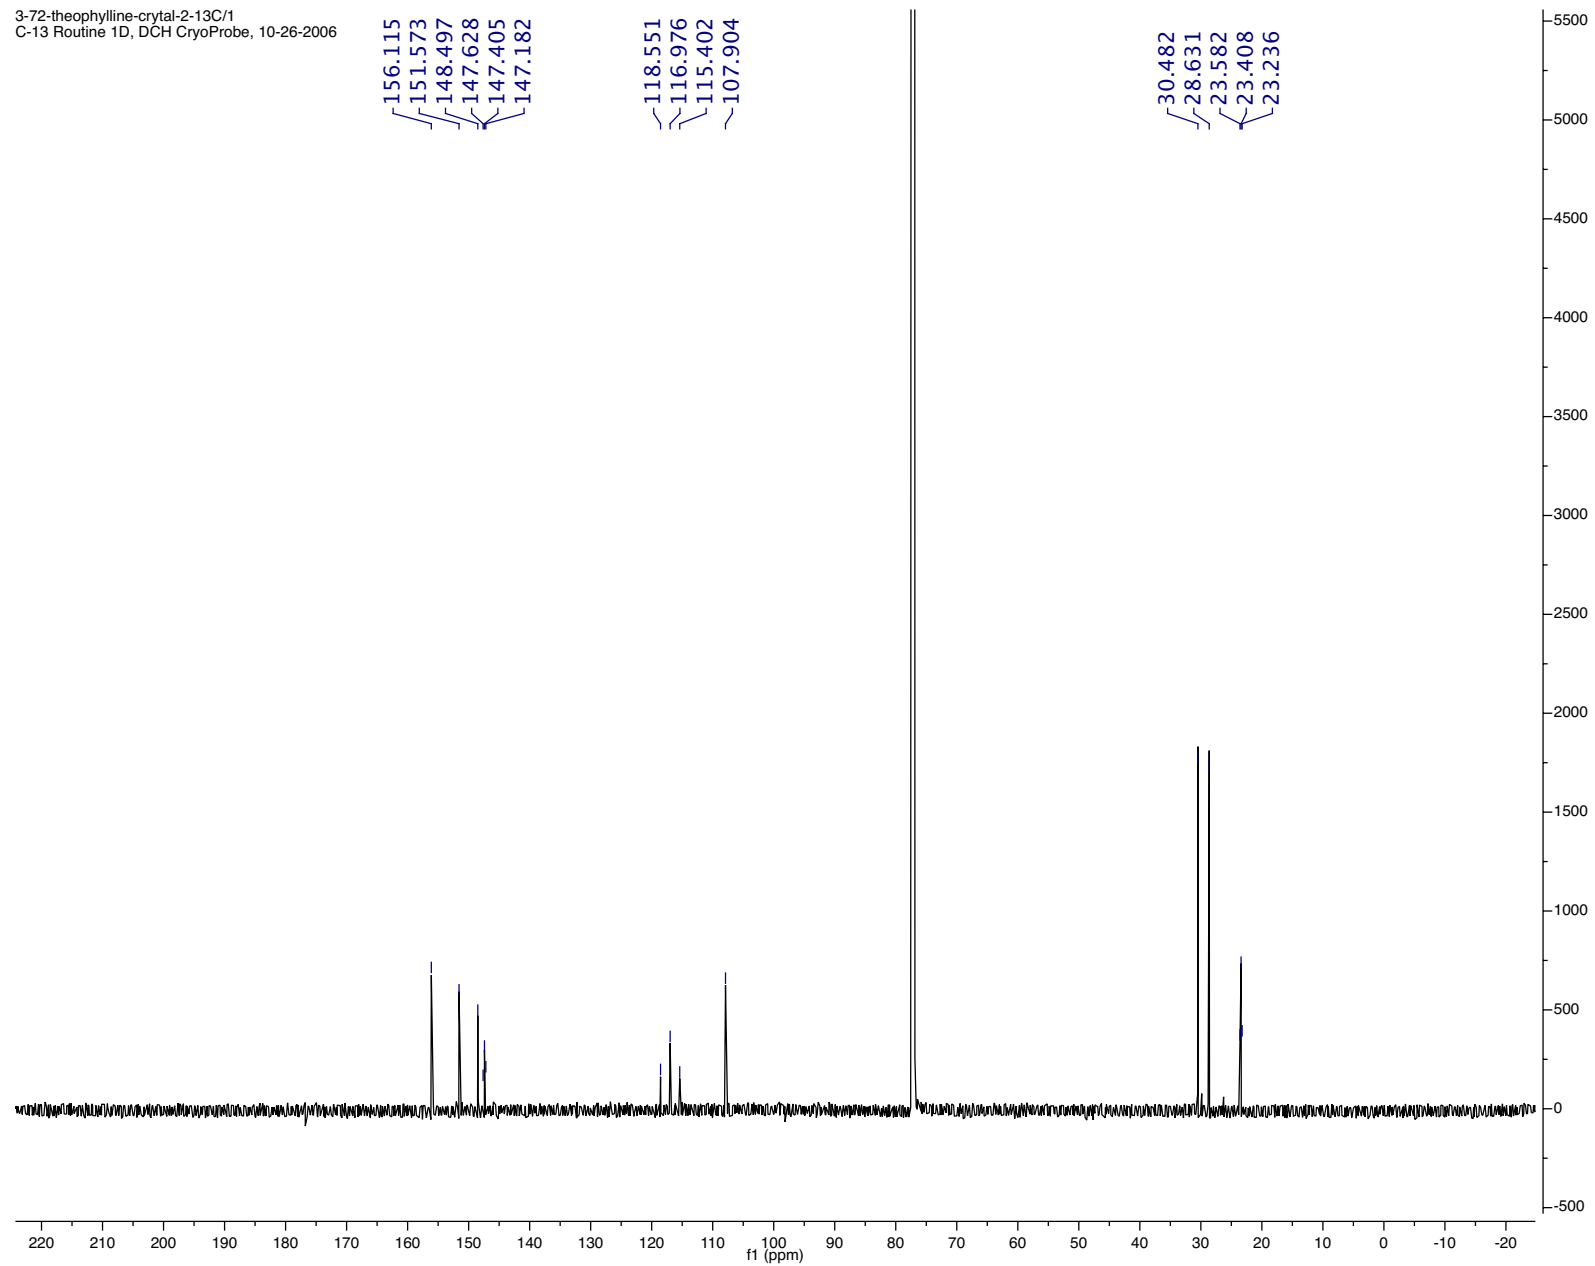

SI-115

3-72-theorine-F/1  
F-19, CDCl3, DPX-400 QNP Probe. CF3Cl as Ref at 0 ppm

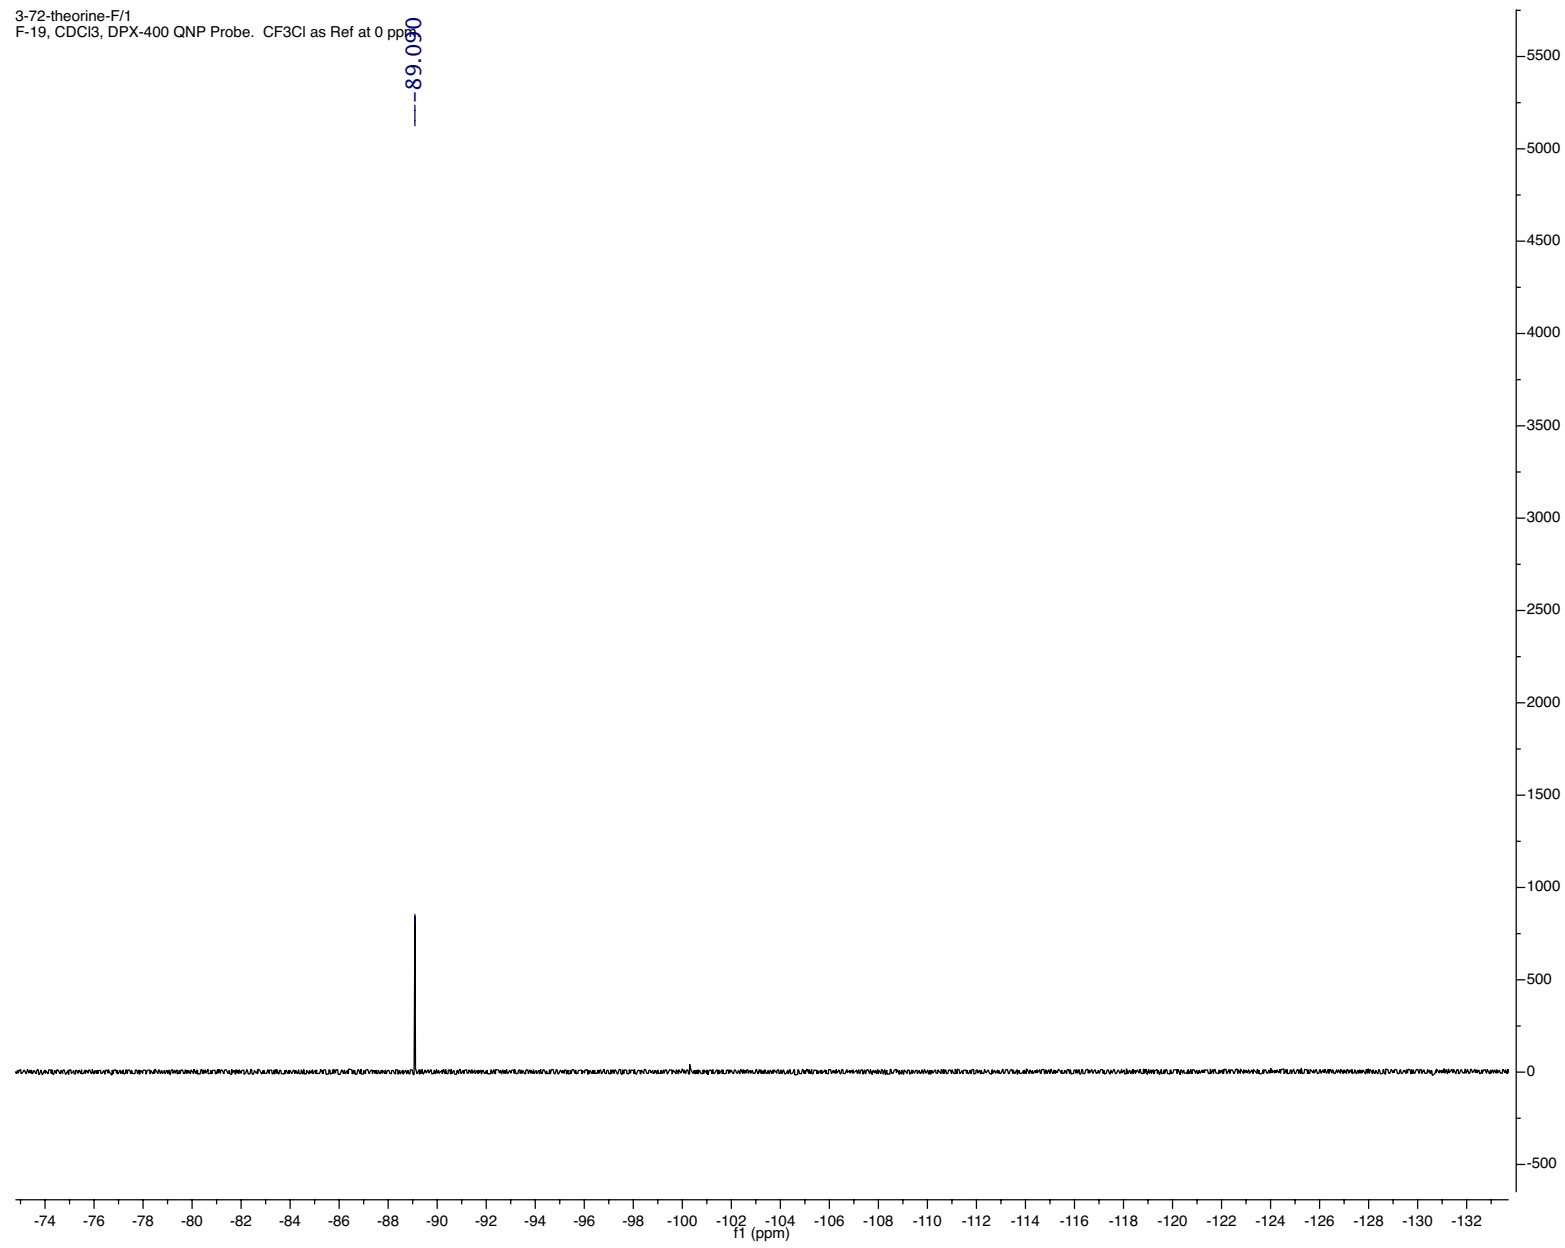

AR-250\_HP\_01  
Std proton

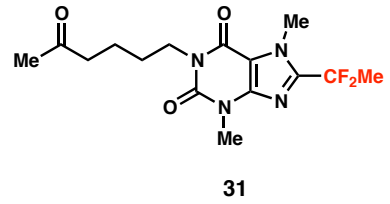

— 7.26

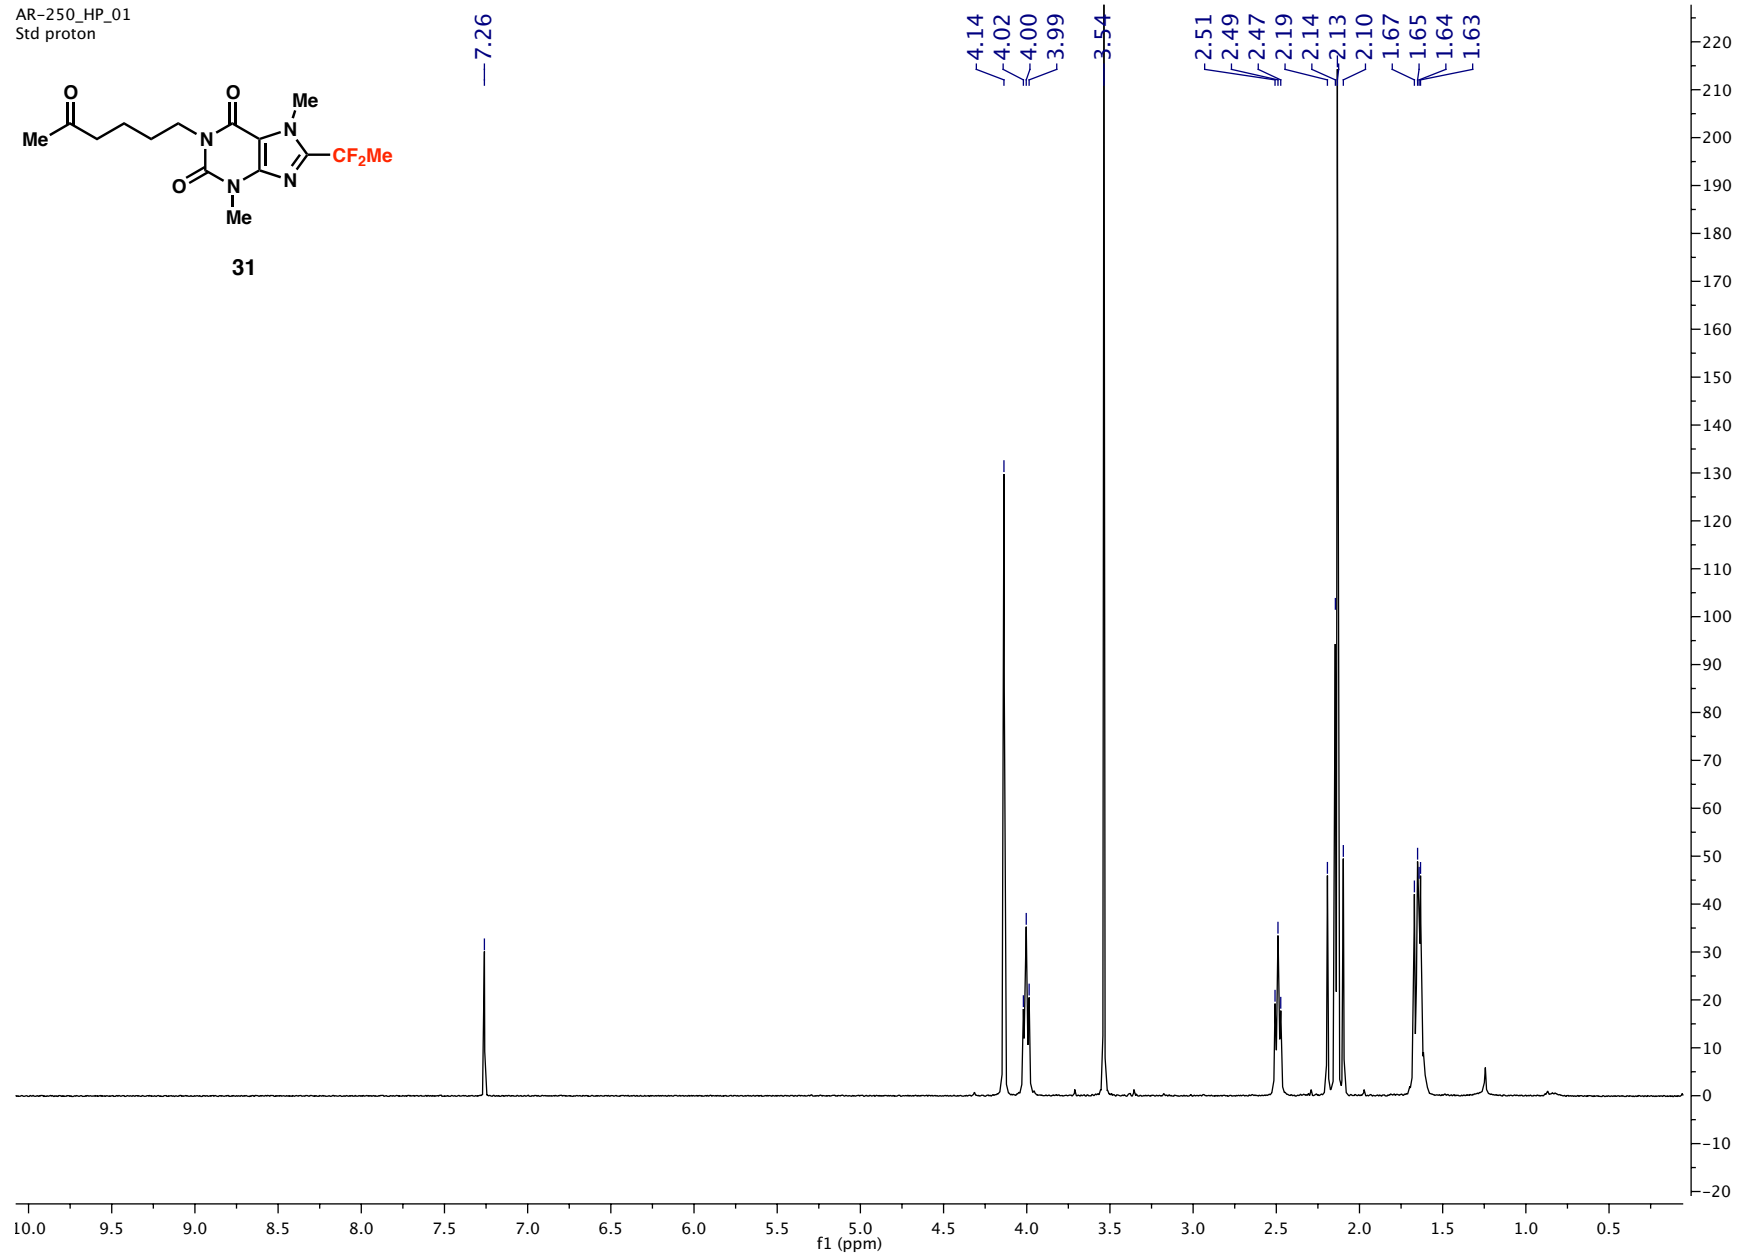

AR-250-C13-1.fid  
C-13 Routine Q1D, DCH CryoProbe, 10-26-2006

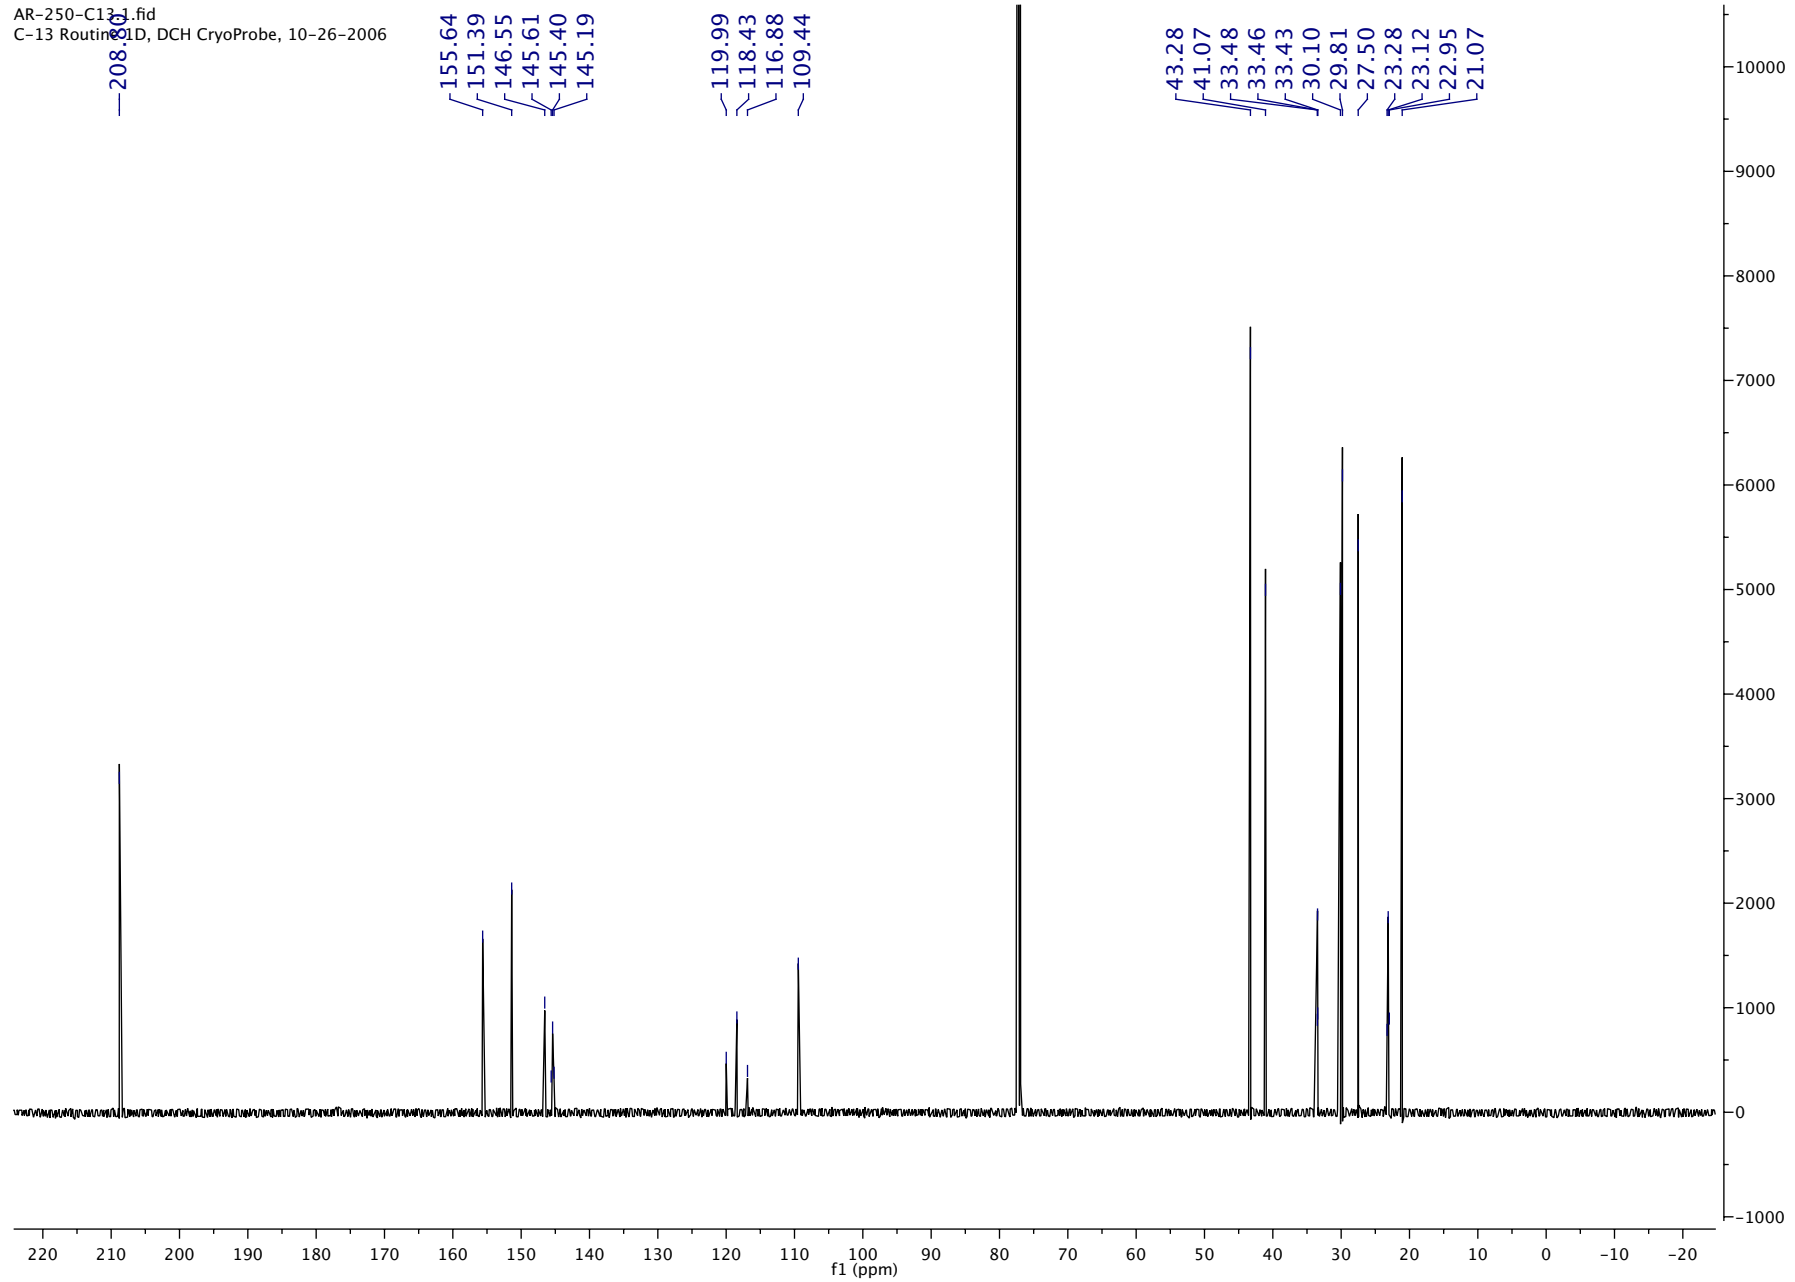

SI-118

AR-250-F.1.fid  
F-19/CDCL3, Ref with CCl3F, 10-30-2012

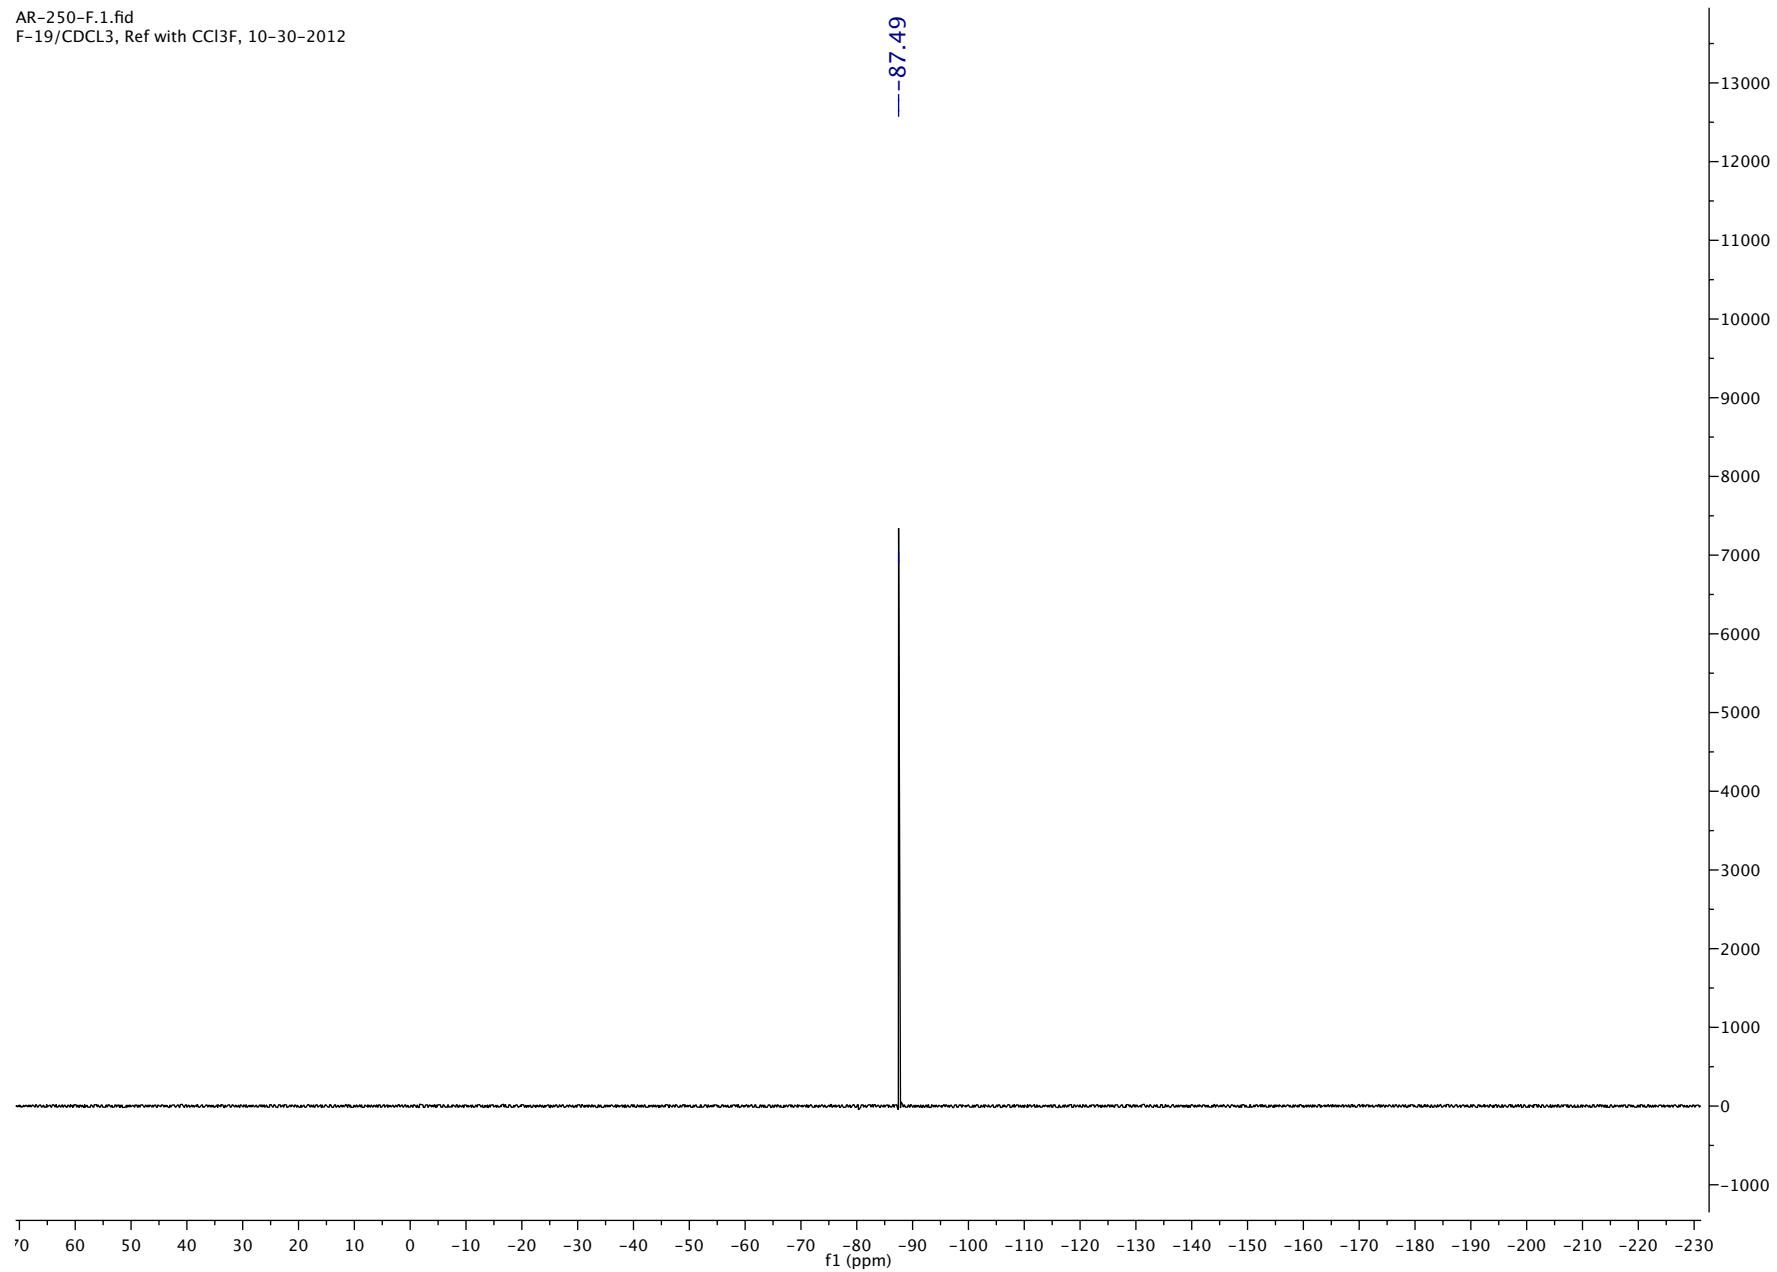

SI-119





ales-224-1C-13C-re.1.fid  
C-13 Routine 1D, DCH CryoProbe, 10-26-2006

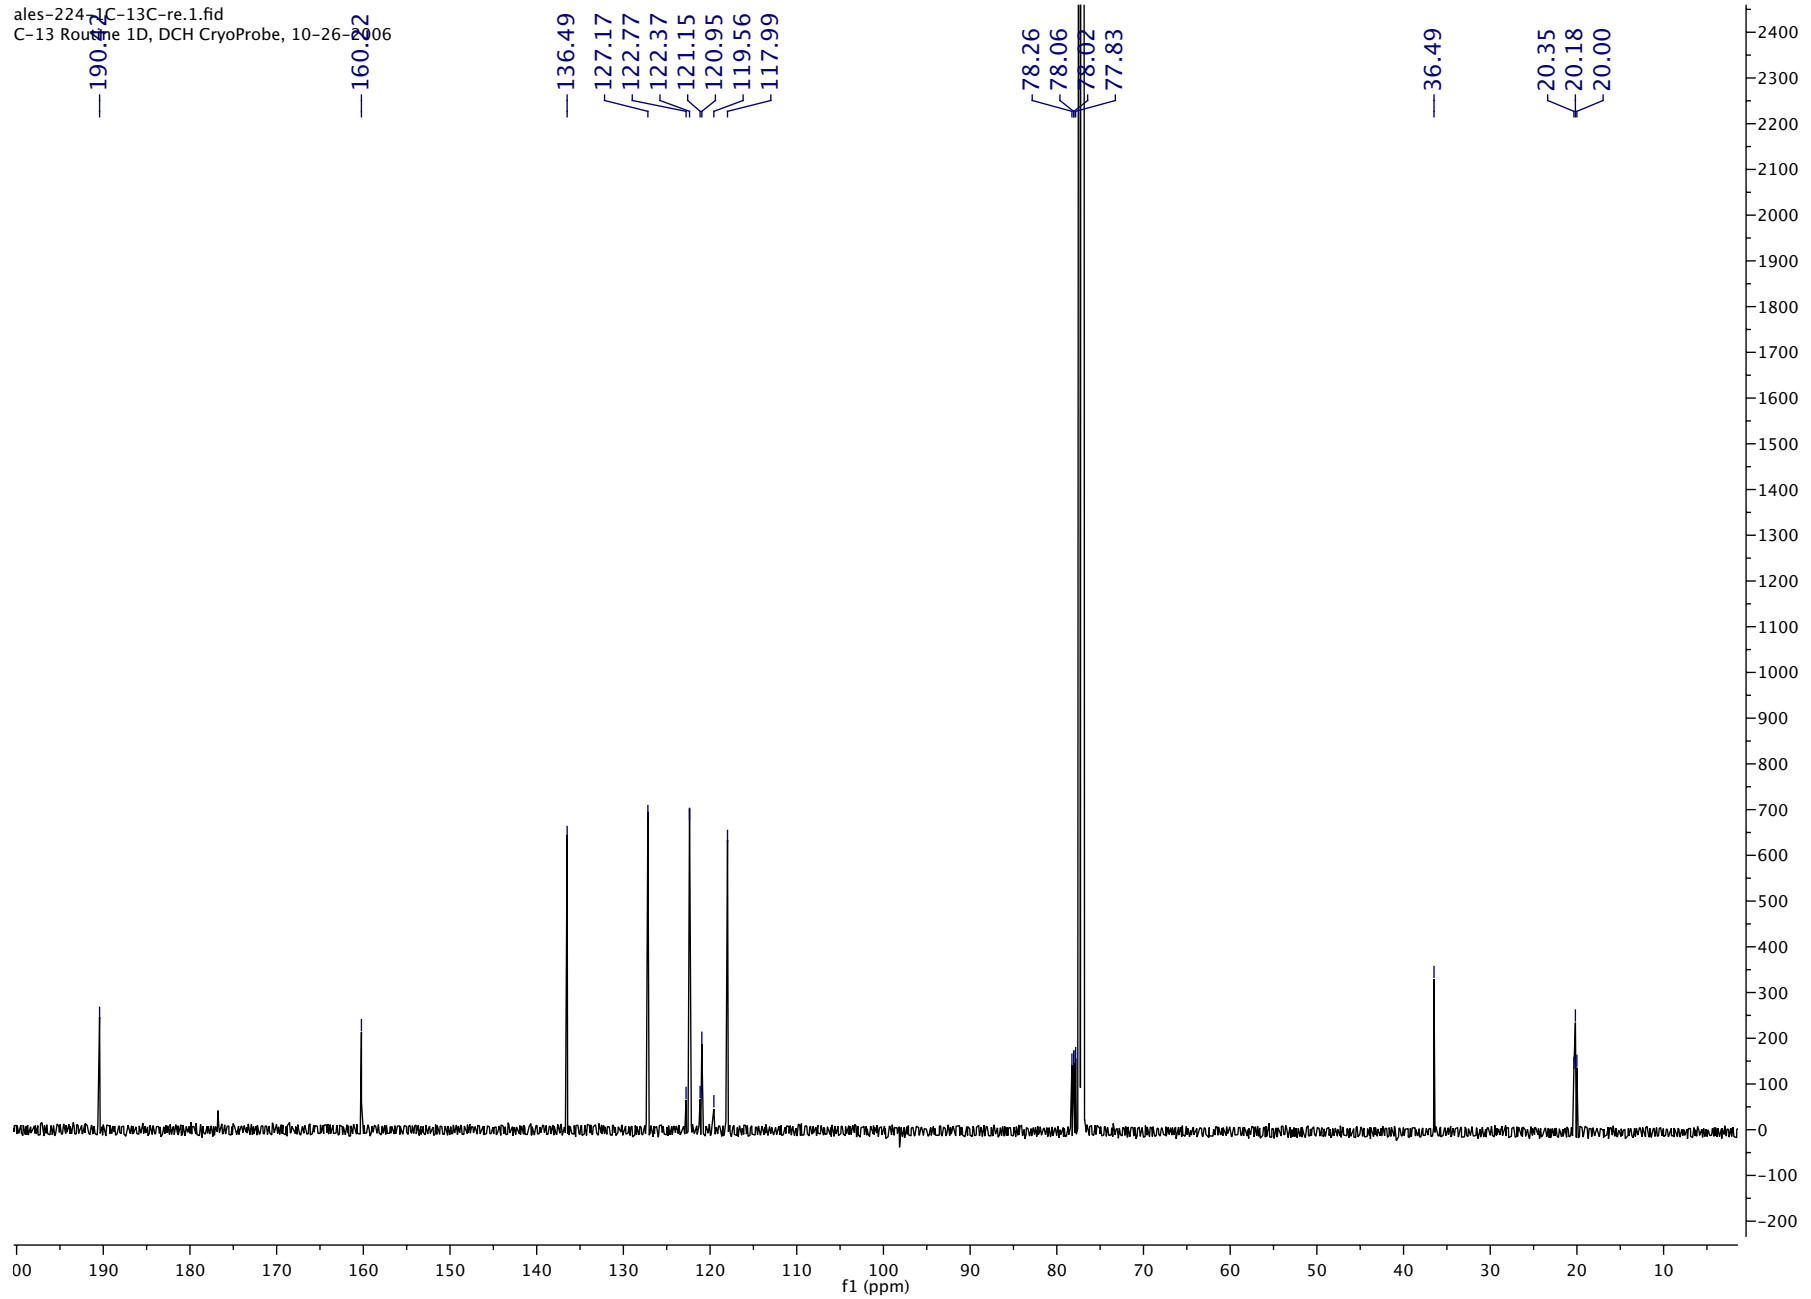

SI-121

Aler\_224\_1\_F.1.fid  
F-19, CDCI3, DPX-400 QNP Probe. CF3Cl as Ref at 0 ppm.

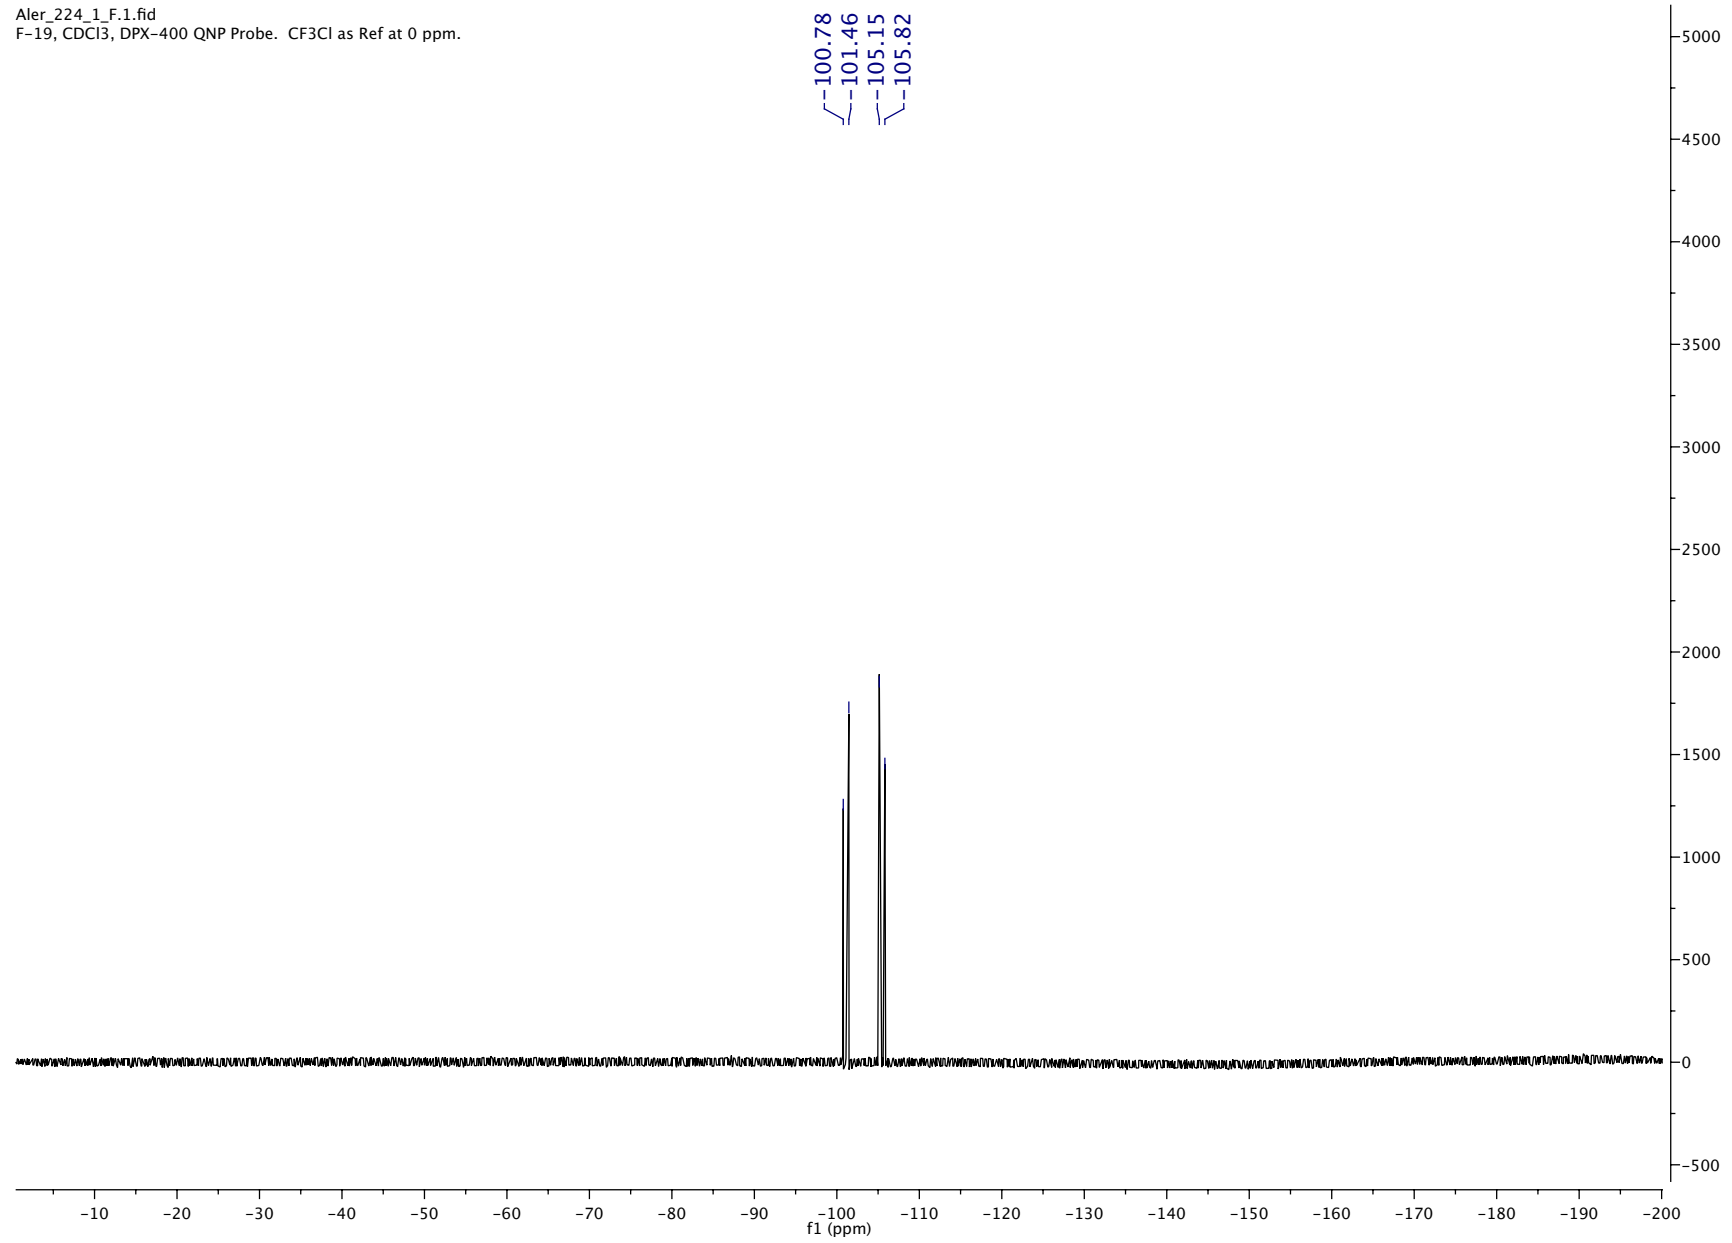

SI-122

AR-225-1dry\_01  
Std proton

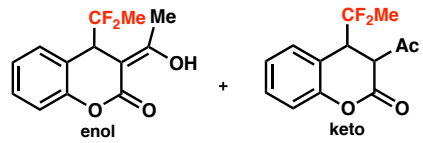

33

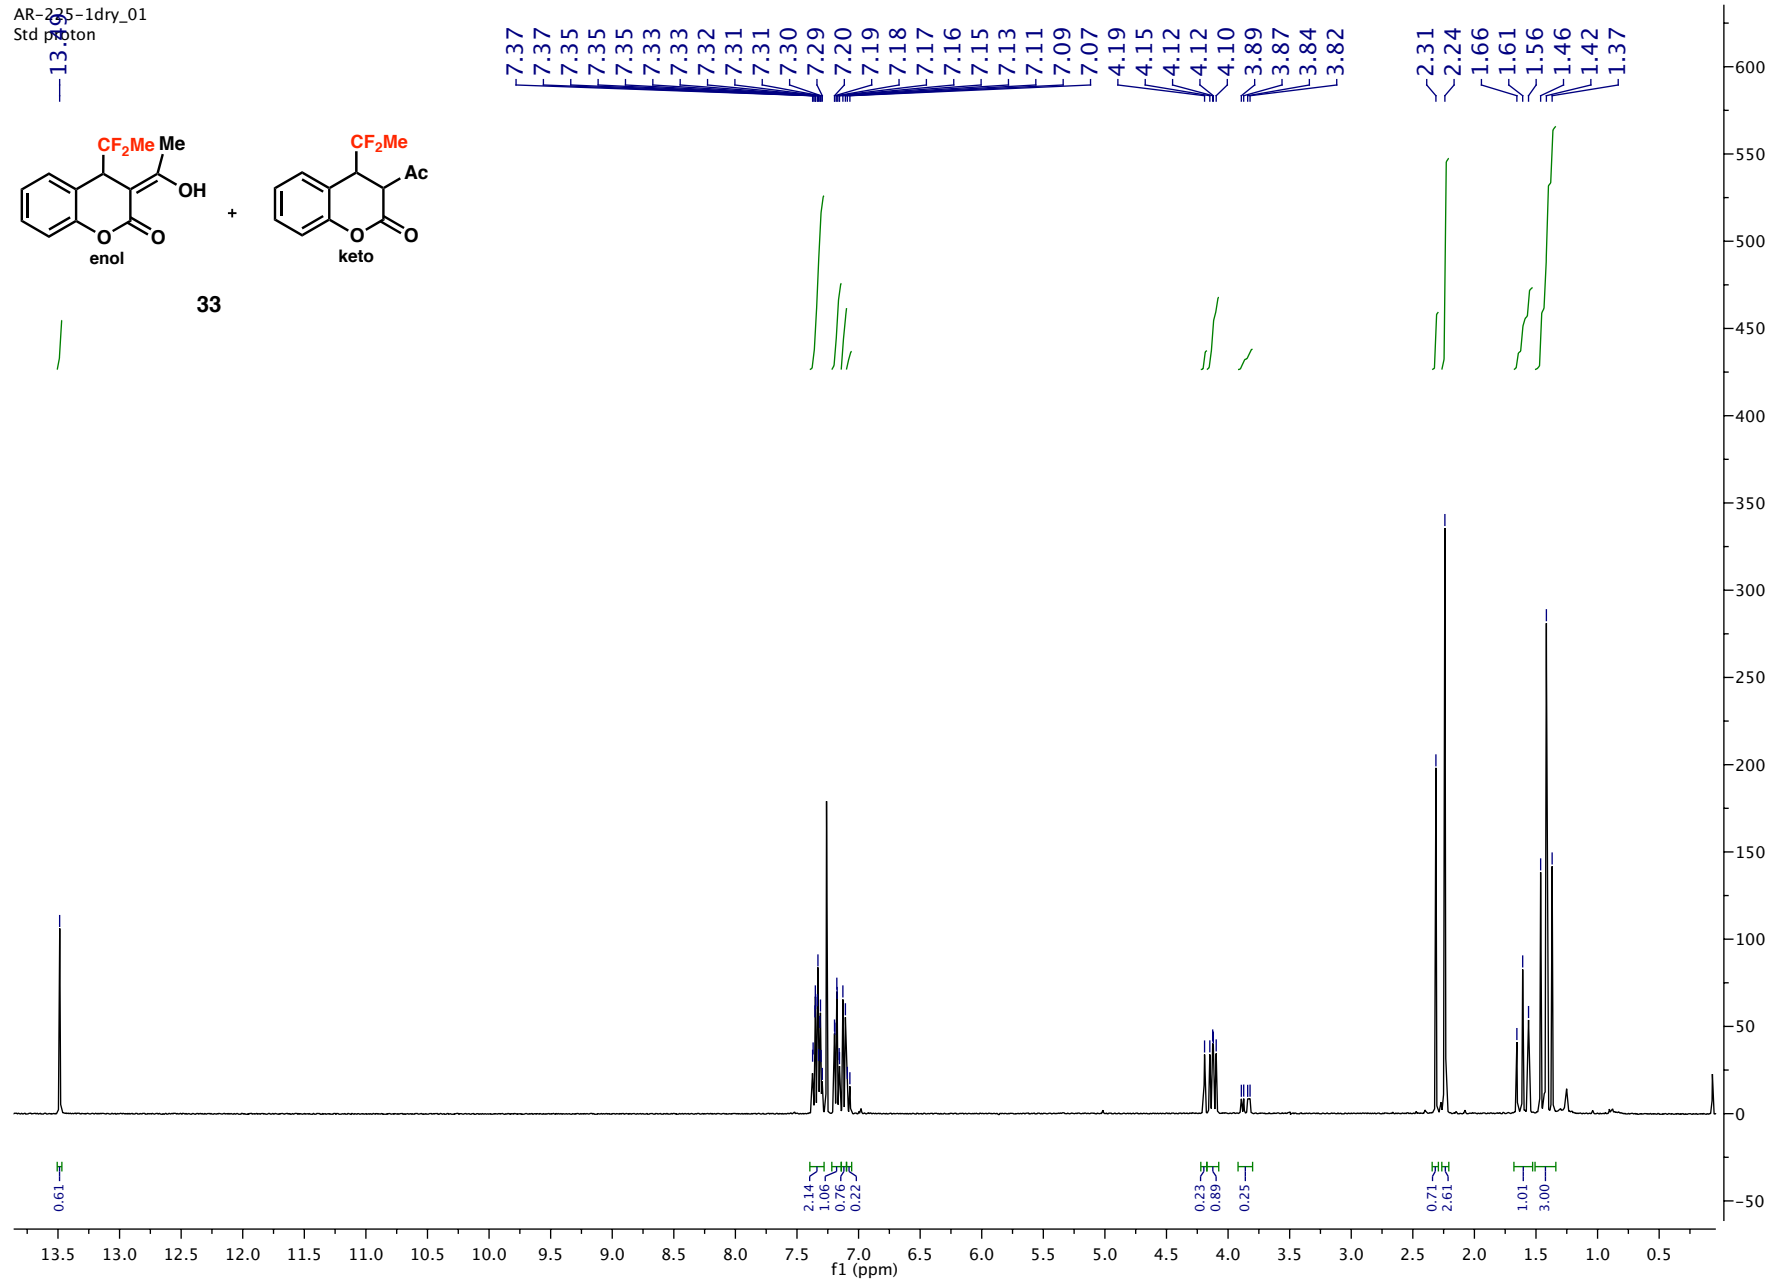

SI-123

aler-225-mix-13C.1.f4  
C-13 Routine 1D, DCH, CryoProbe, 126-200

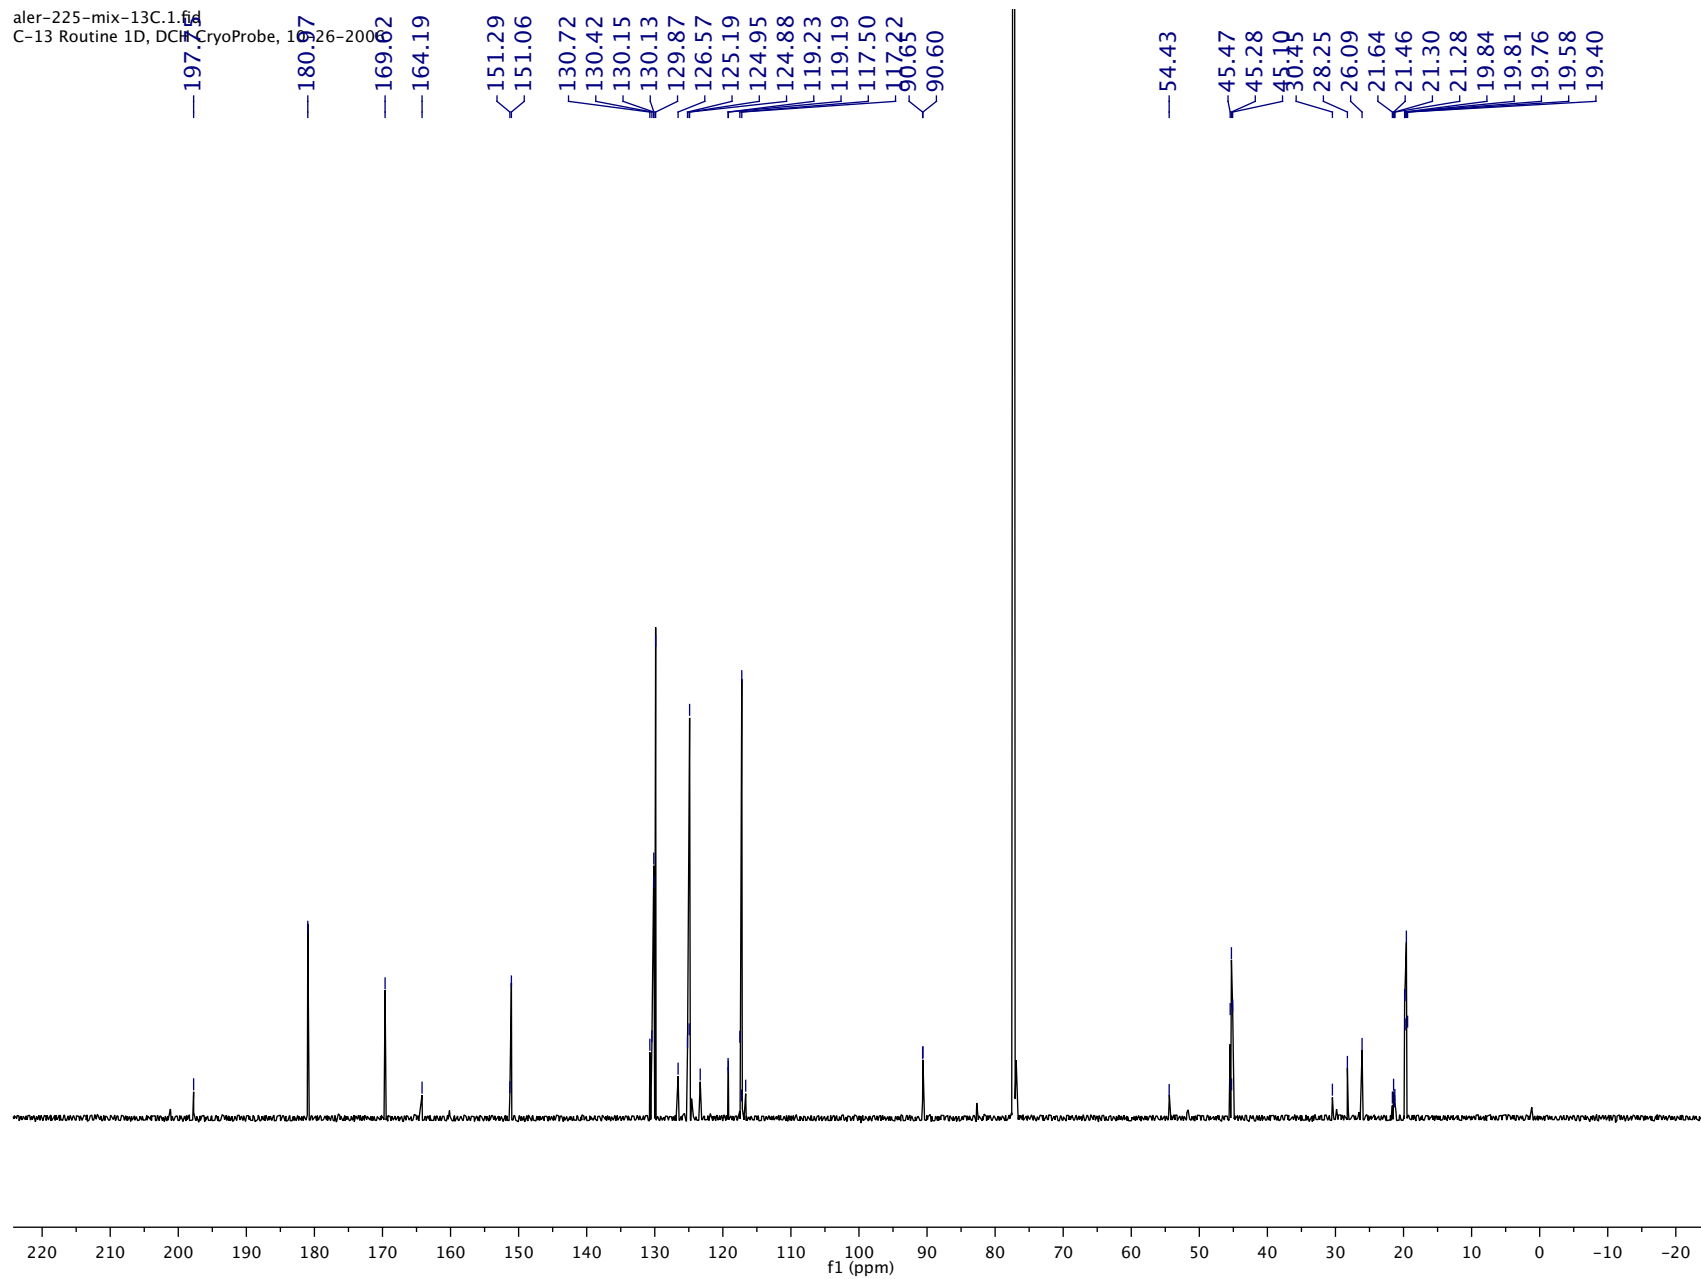

AR-225-dry-F.555.fid  
F-19, CDCl3, DPX-400 QNP Probe. CF3Cl as Ref at 0 ppm.

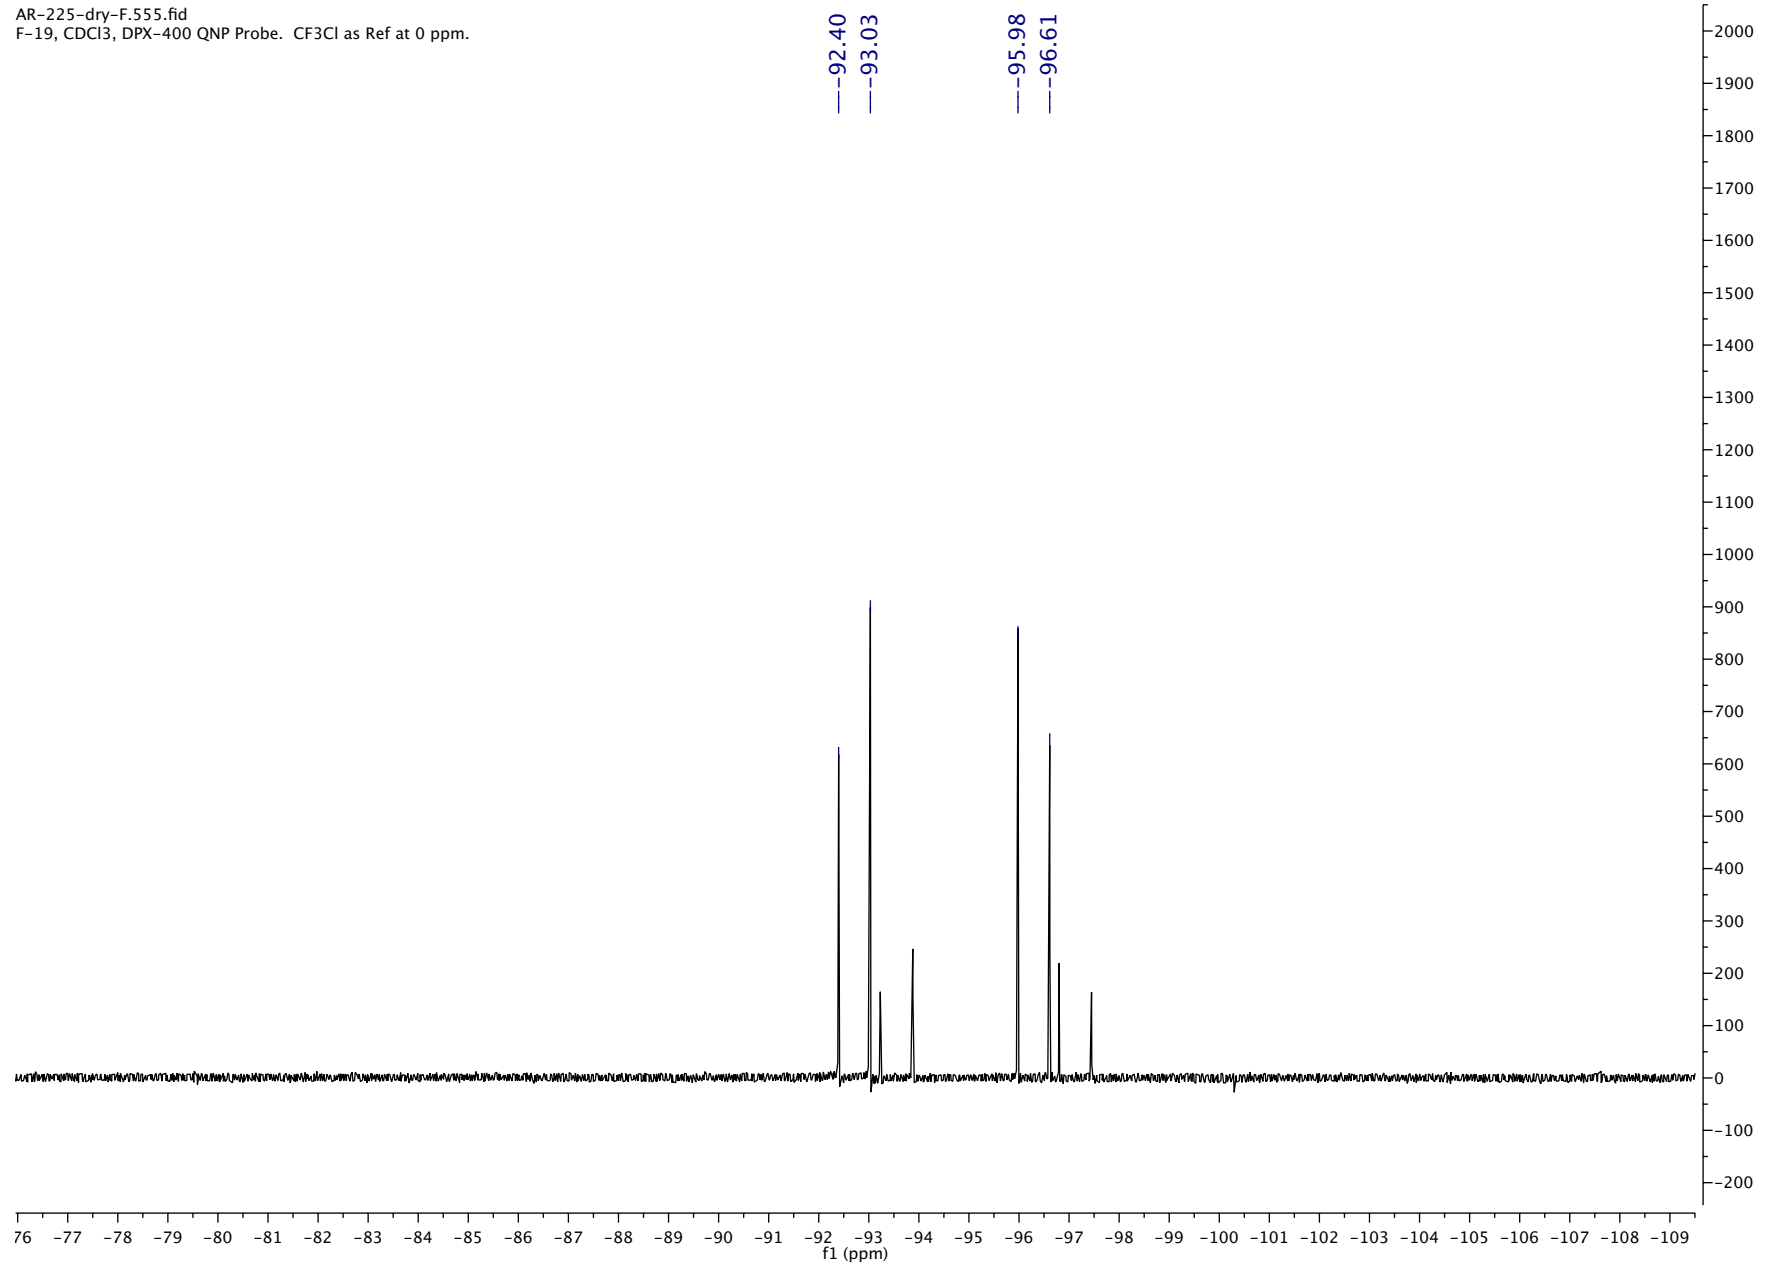

SI-125



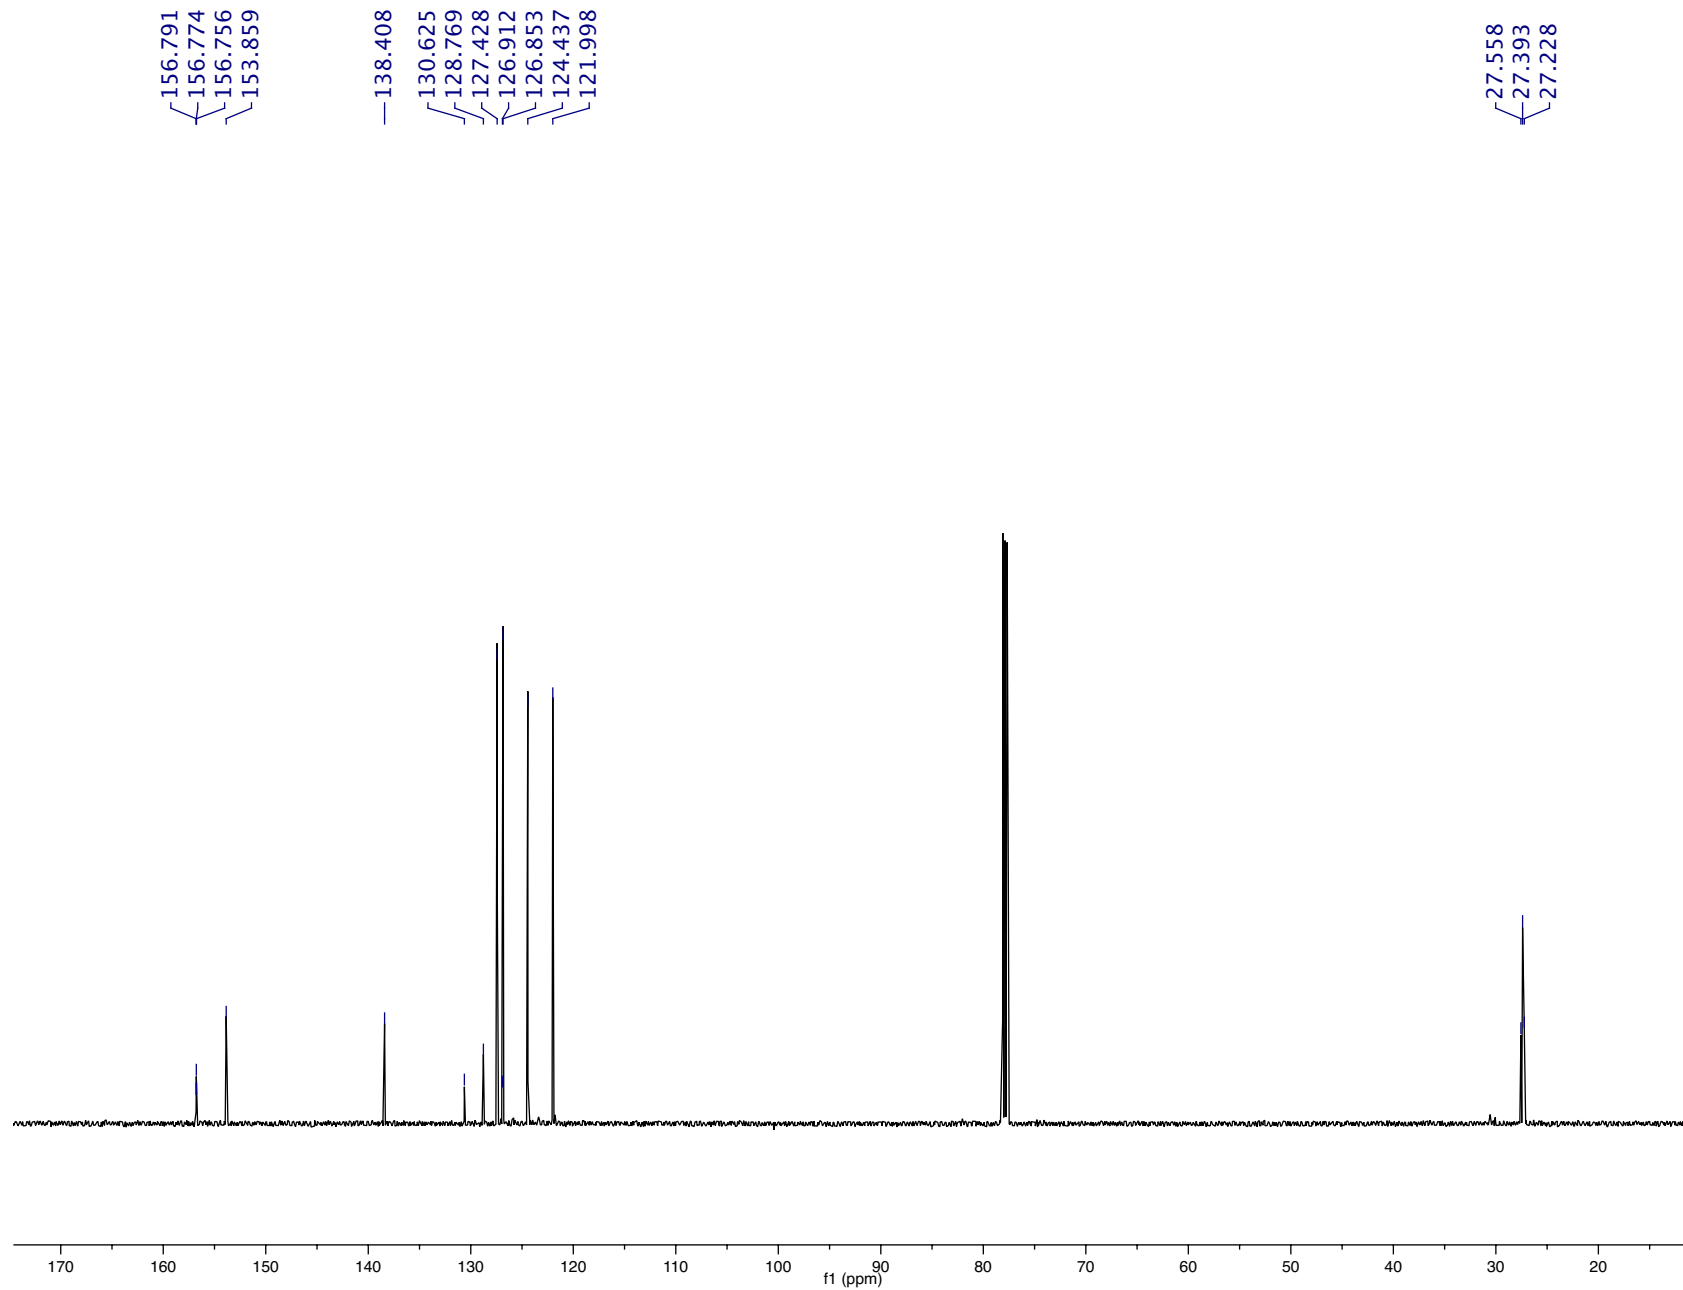

SI-127

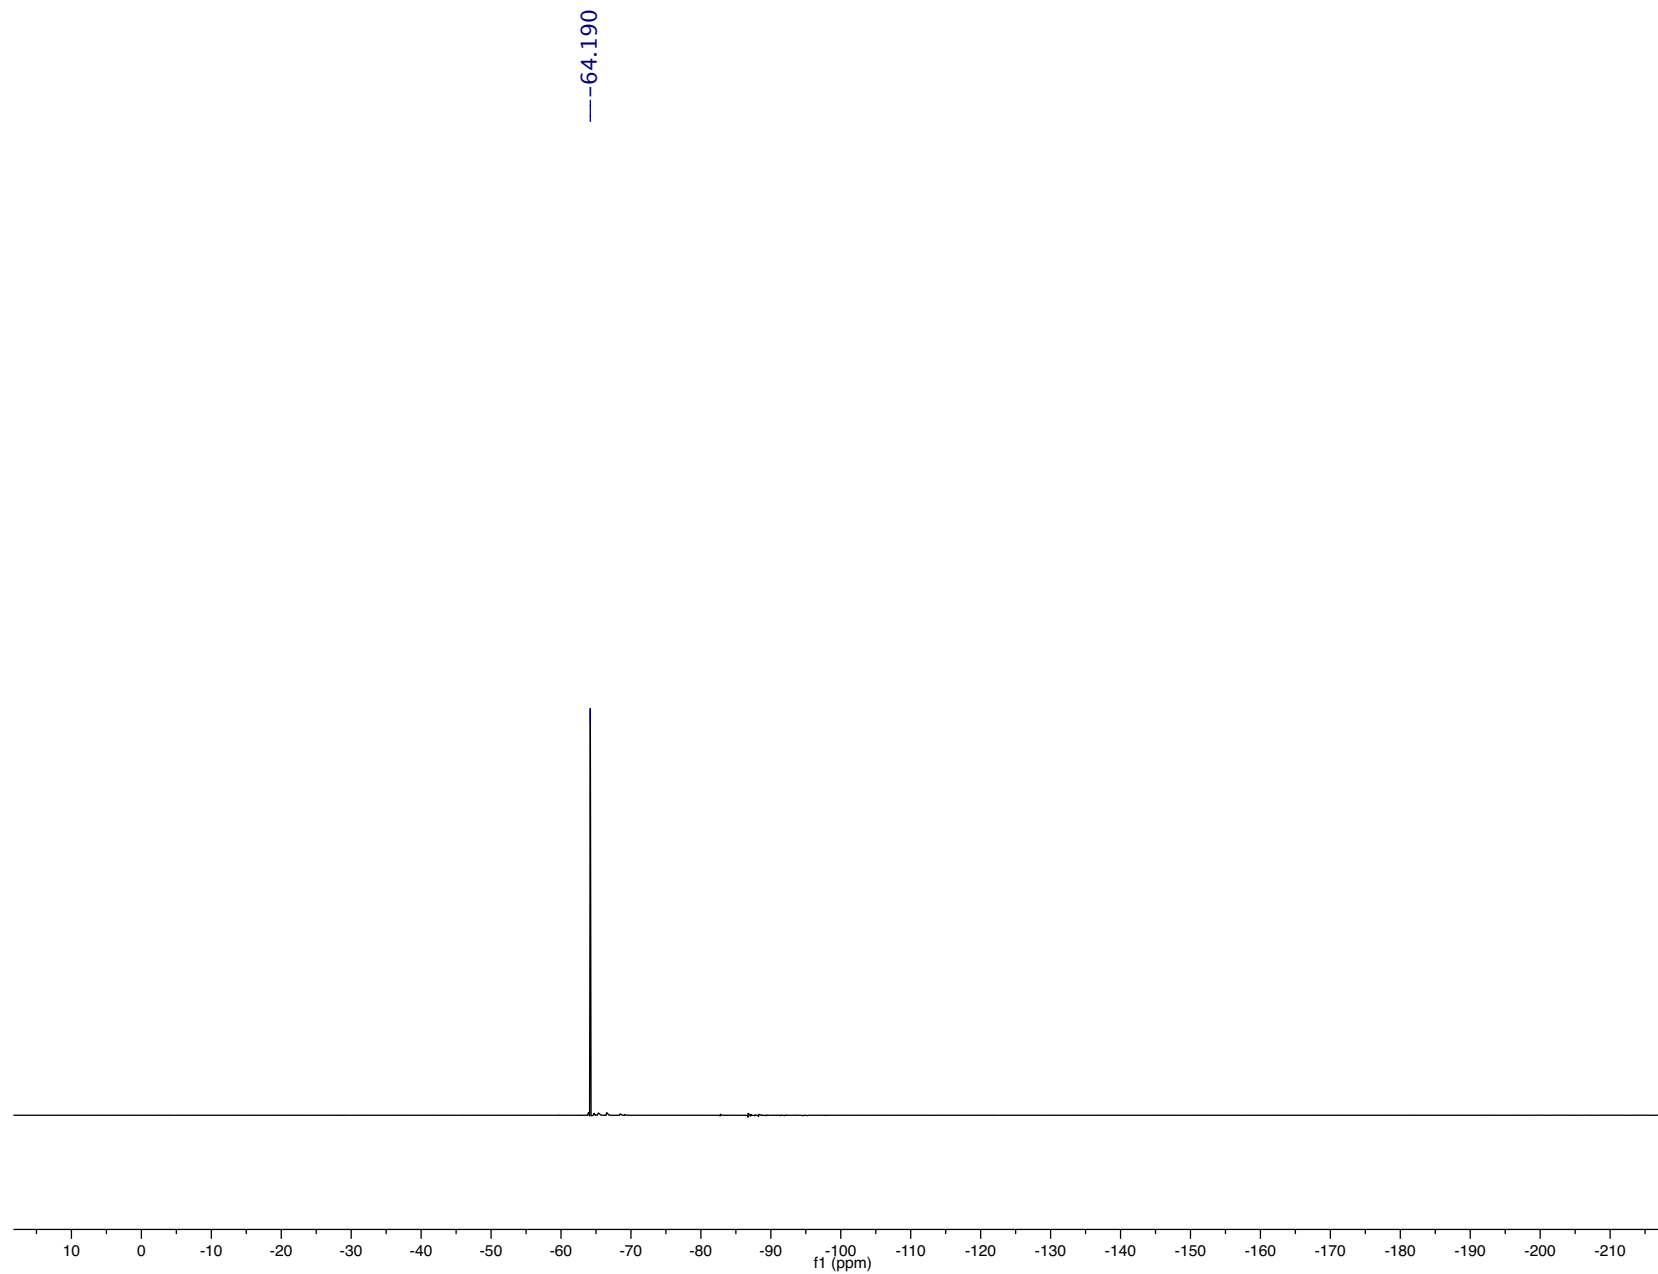

SI-128



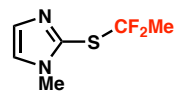

35

7.206  
7.204  
7.125  
7.123

1.994  
1.951  
1.908

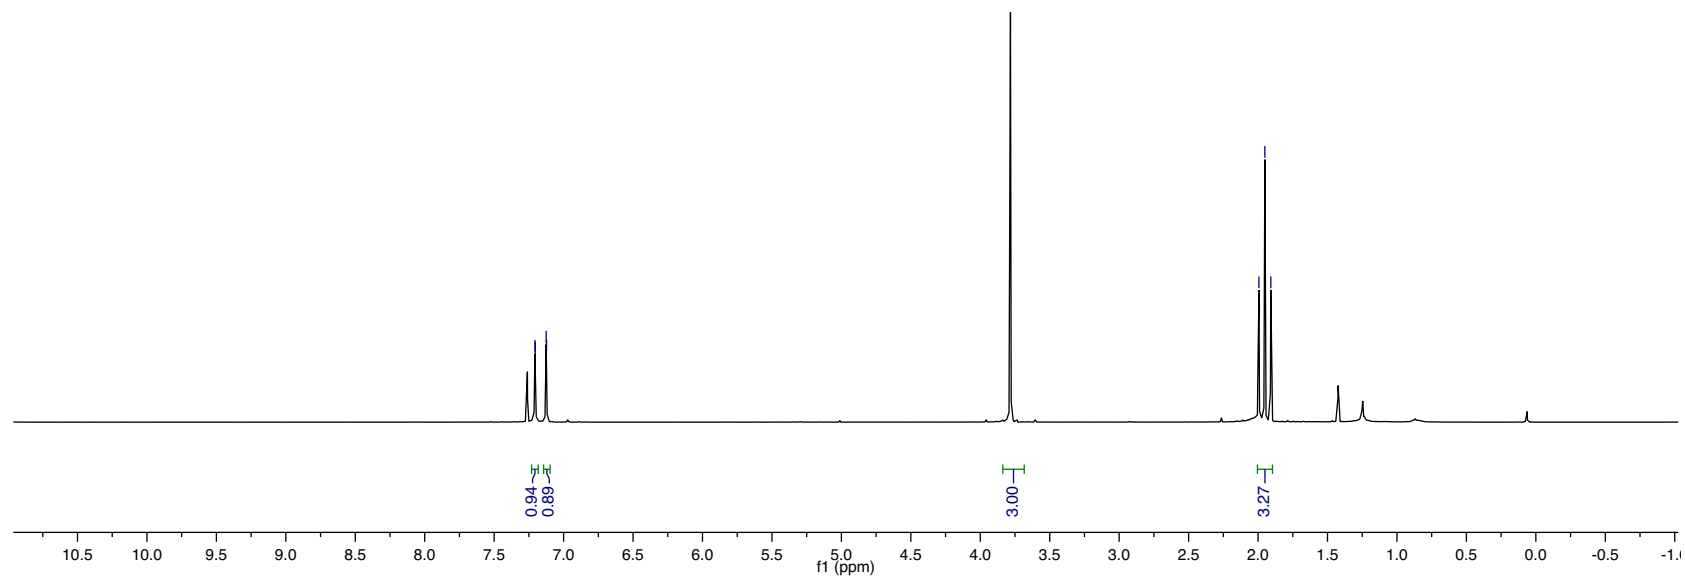

SI-129

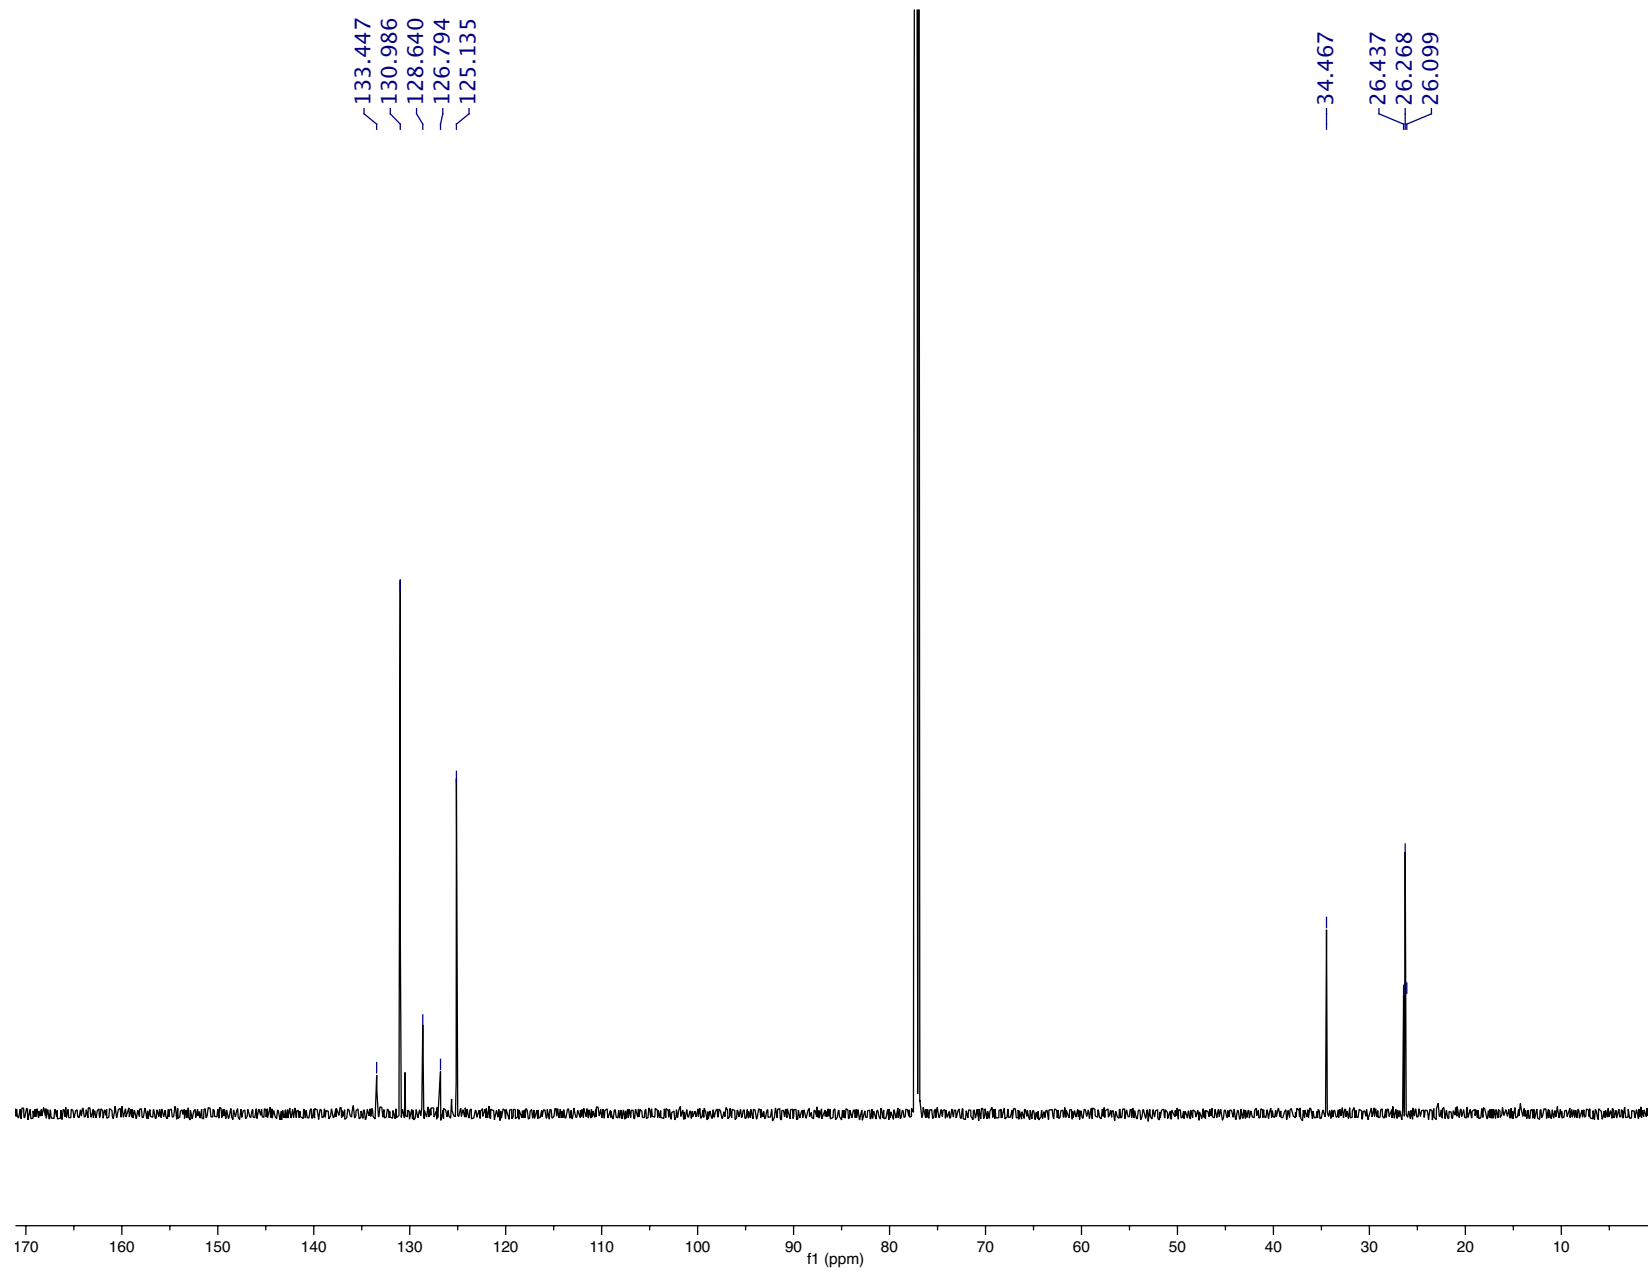

SI-130

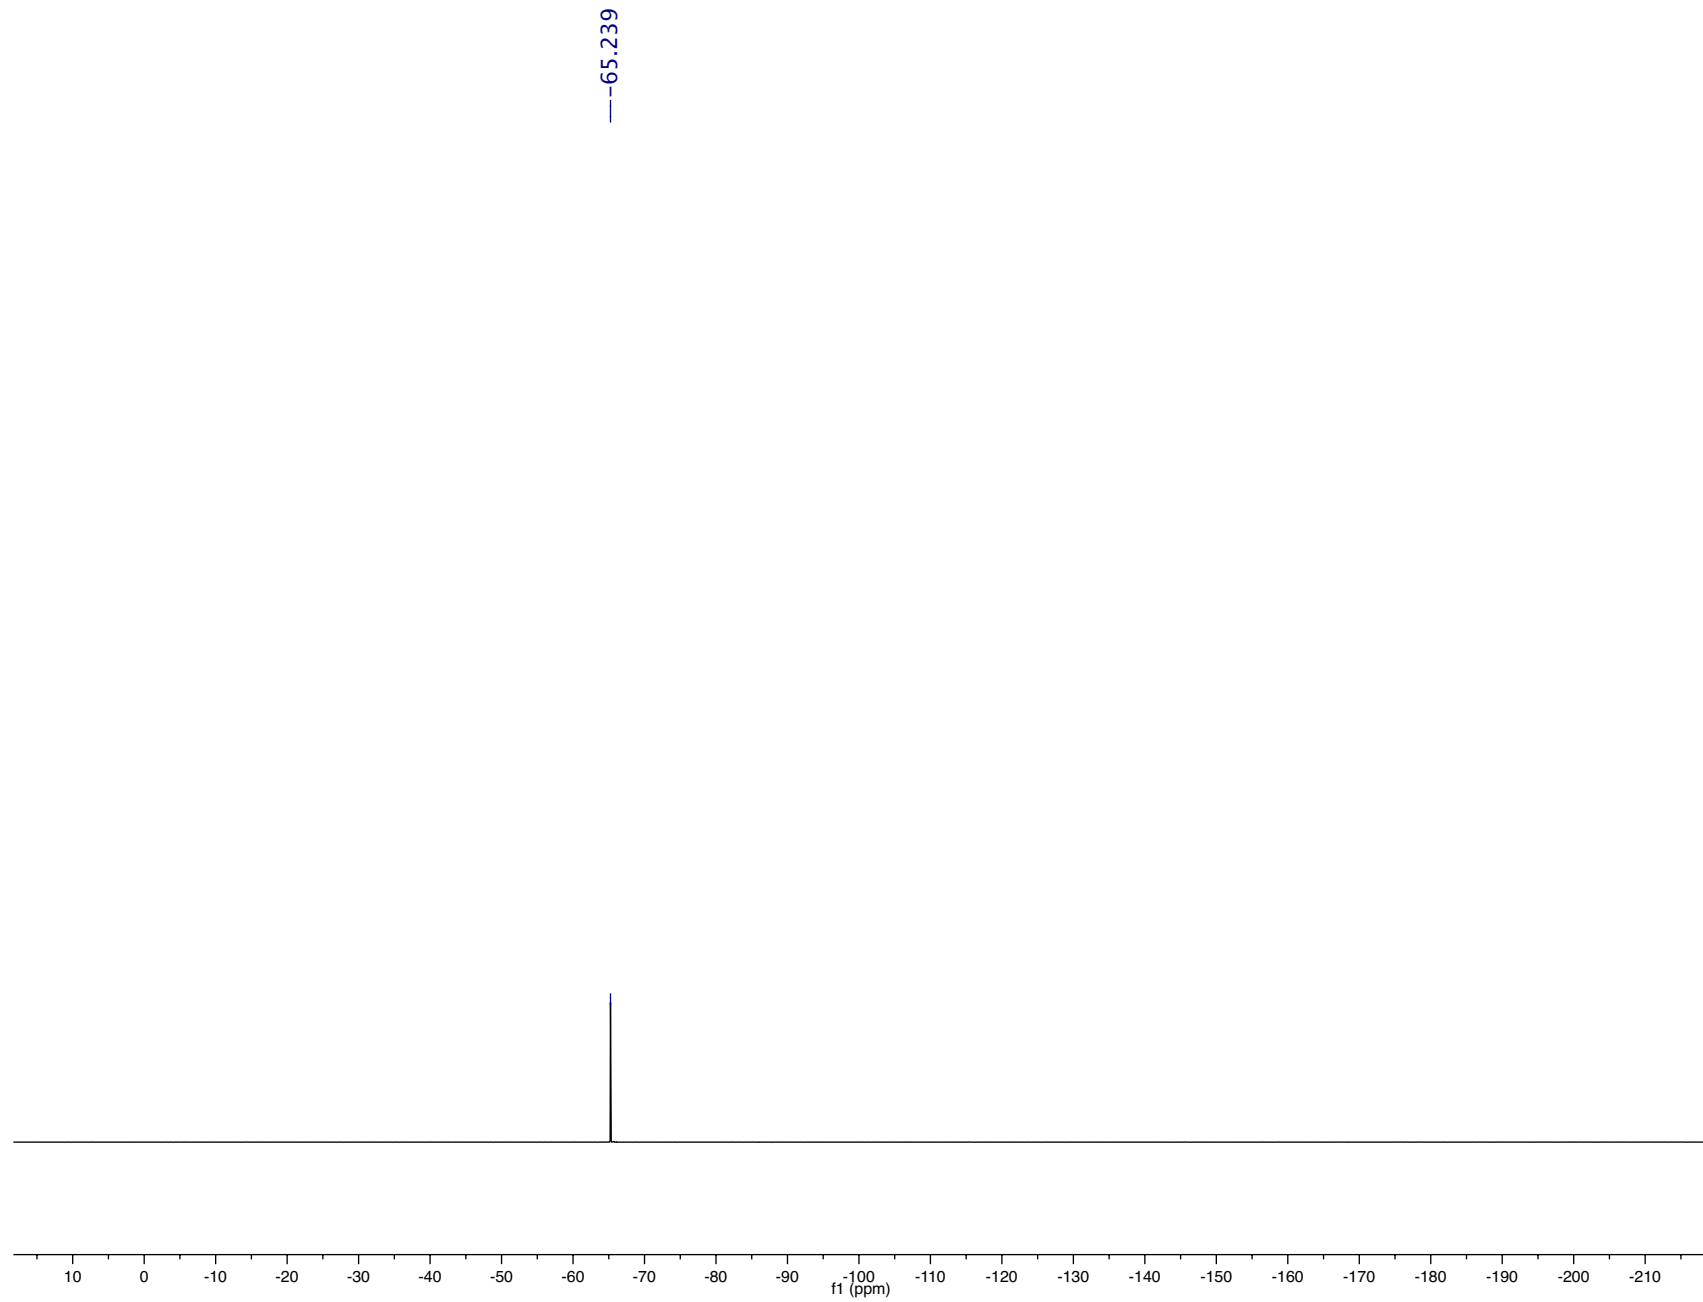

SI-131

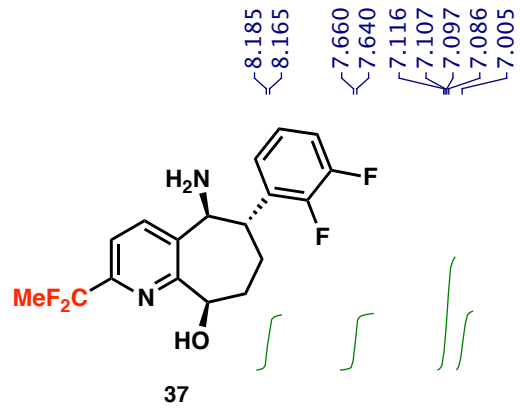

8.185  
8.165  
7.660  
7.640  
7.116  
7.107  
7.097  
7.086  
7.005

5.005  
4.999  
4.977  
4.972  
4.463  
4.440

2.929  
2.907  
2.885  
2.102  
2.056  
2.009  
1.605  
1.578  
1.546  
1.519

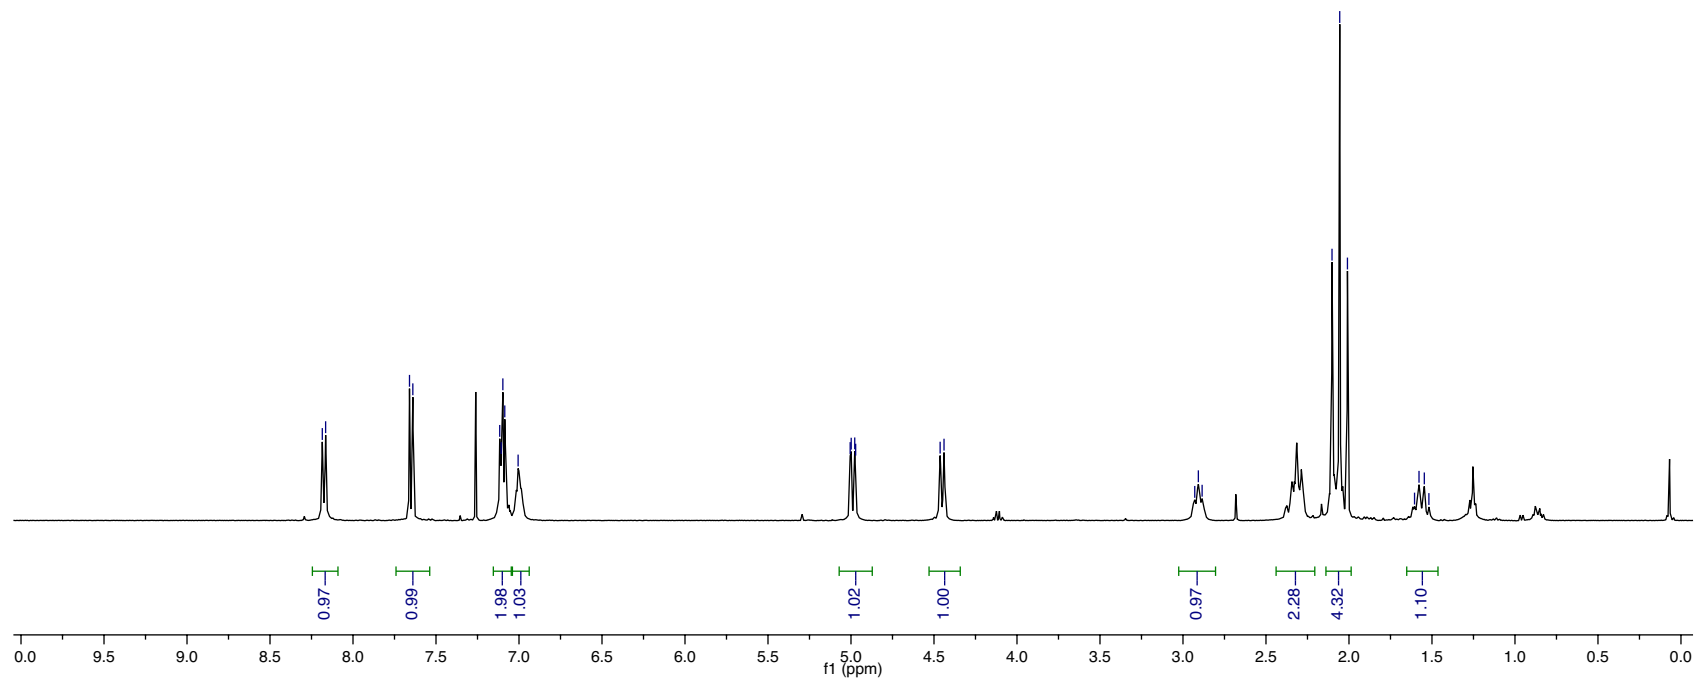

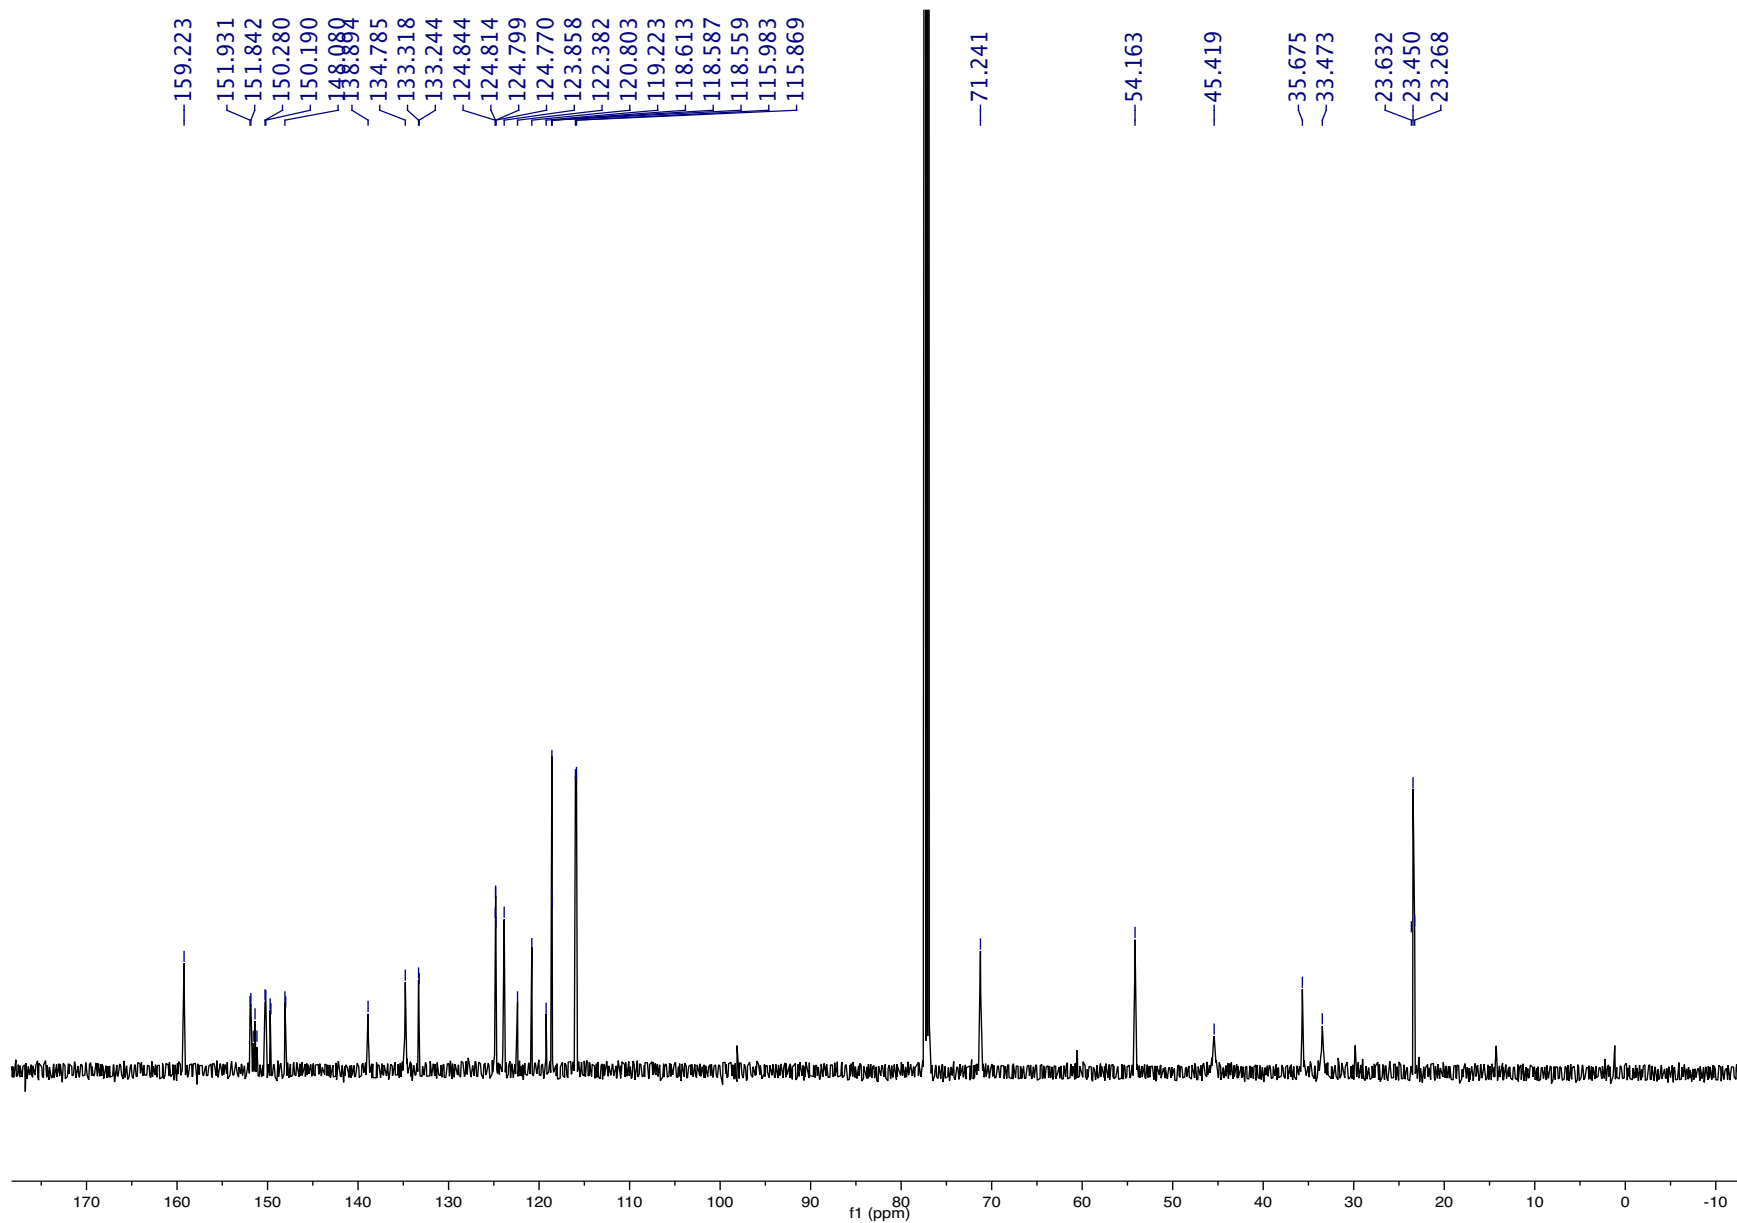

SI-133

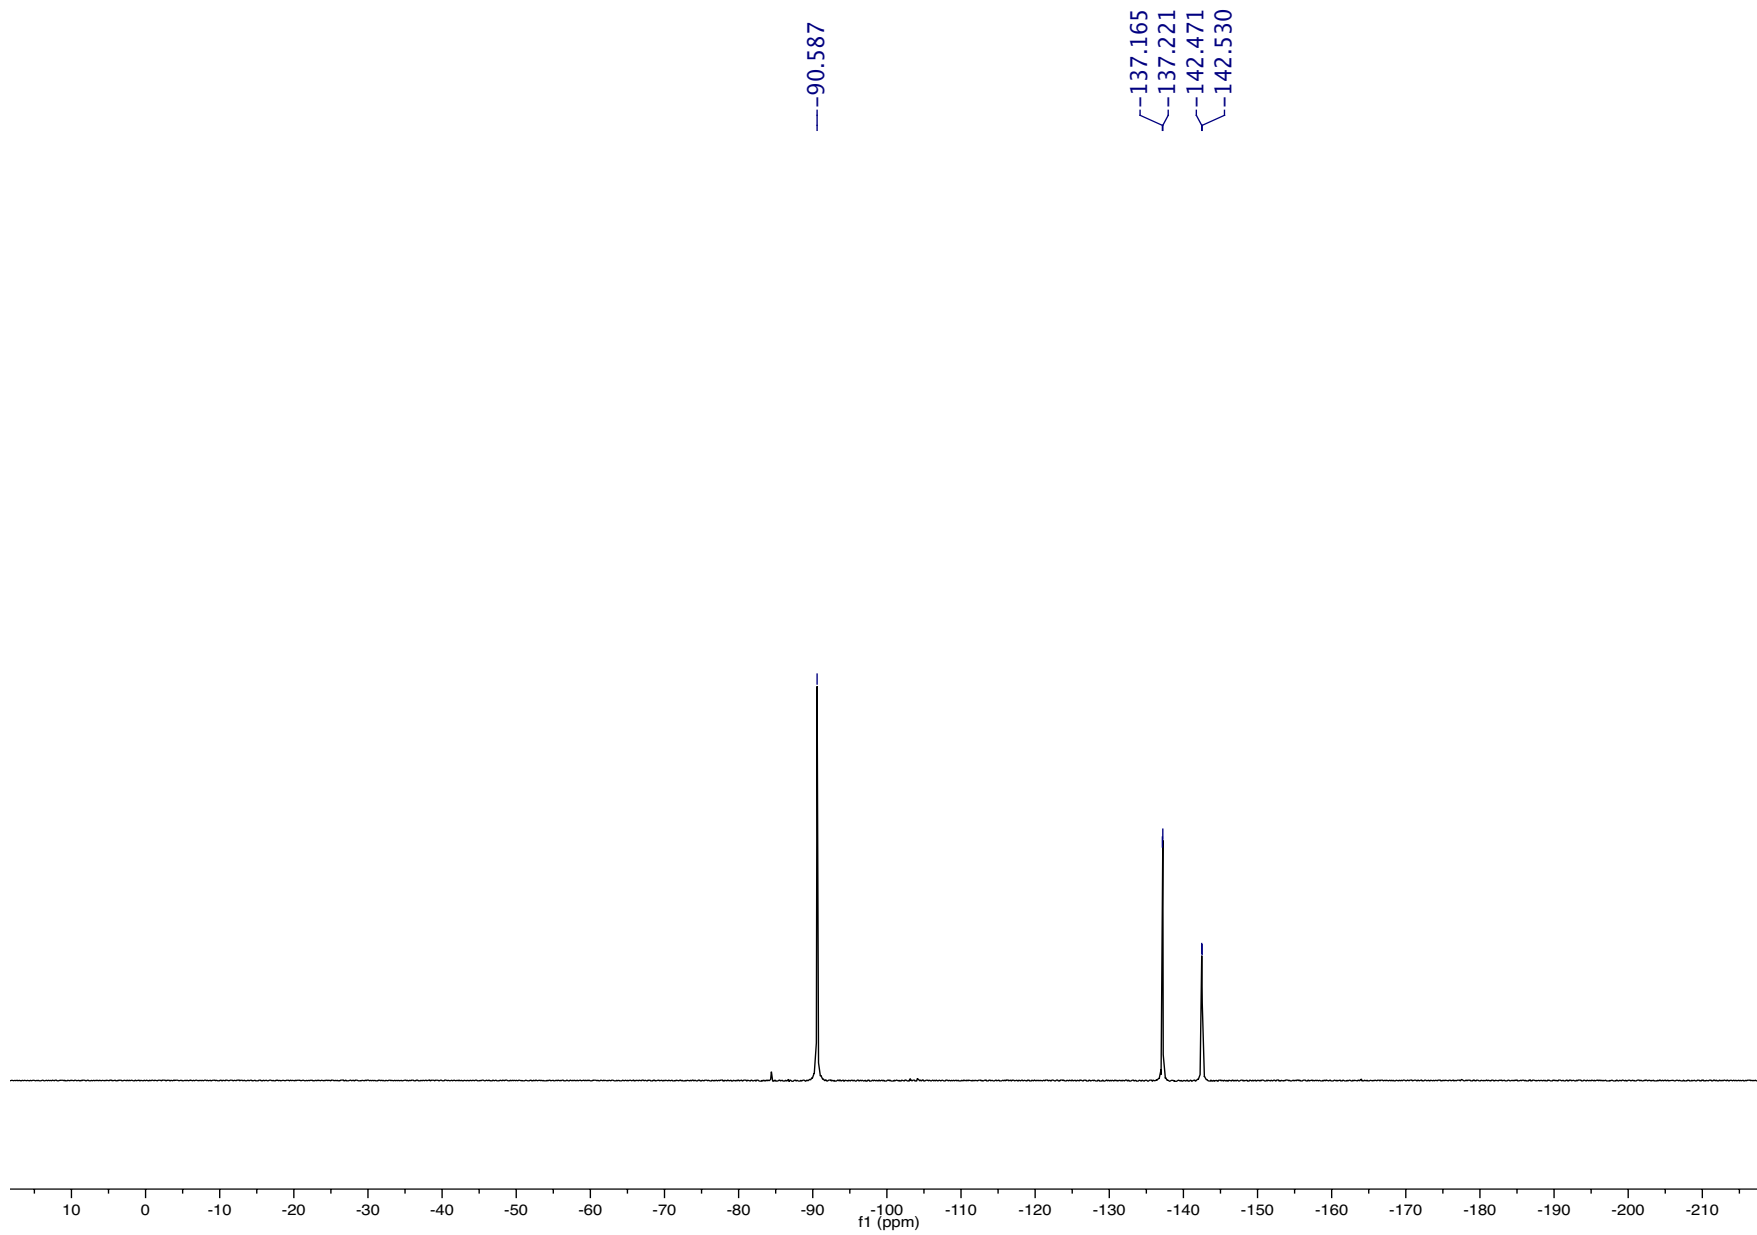

SI-134

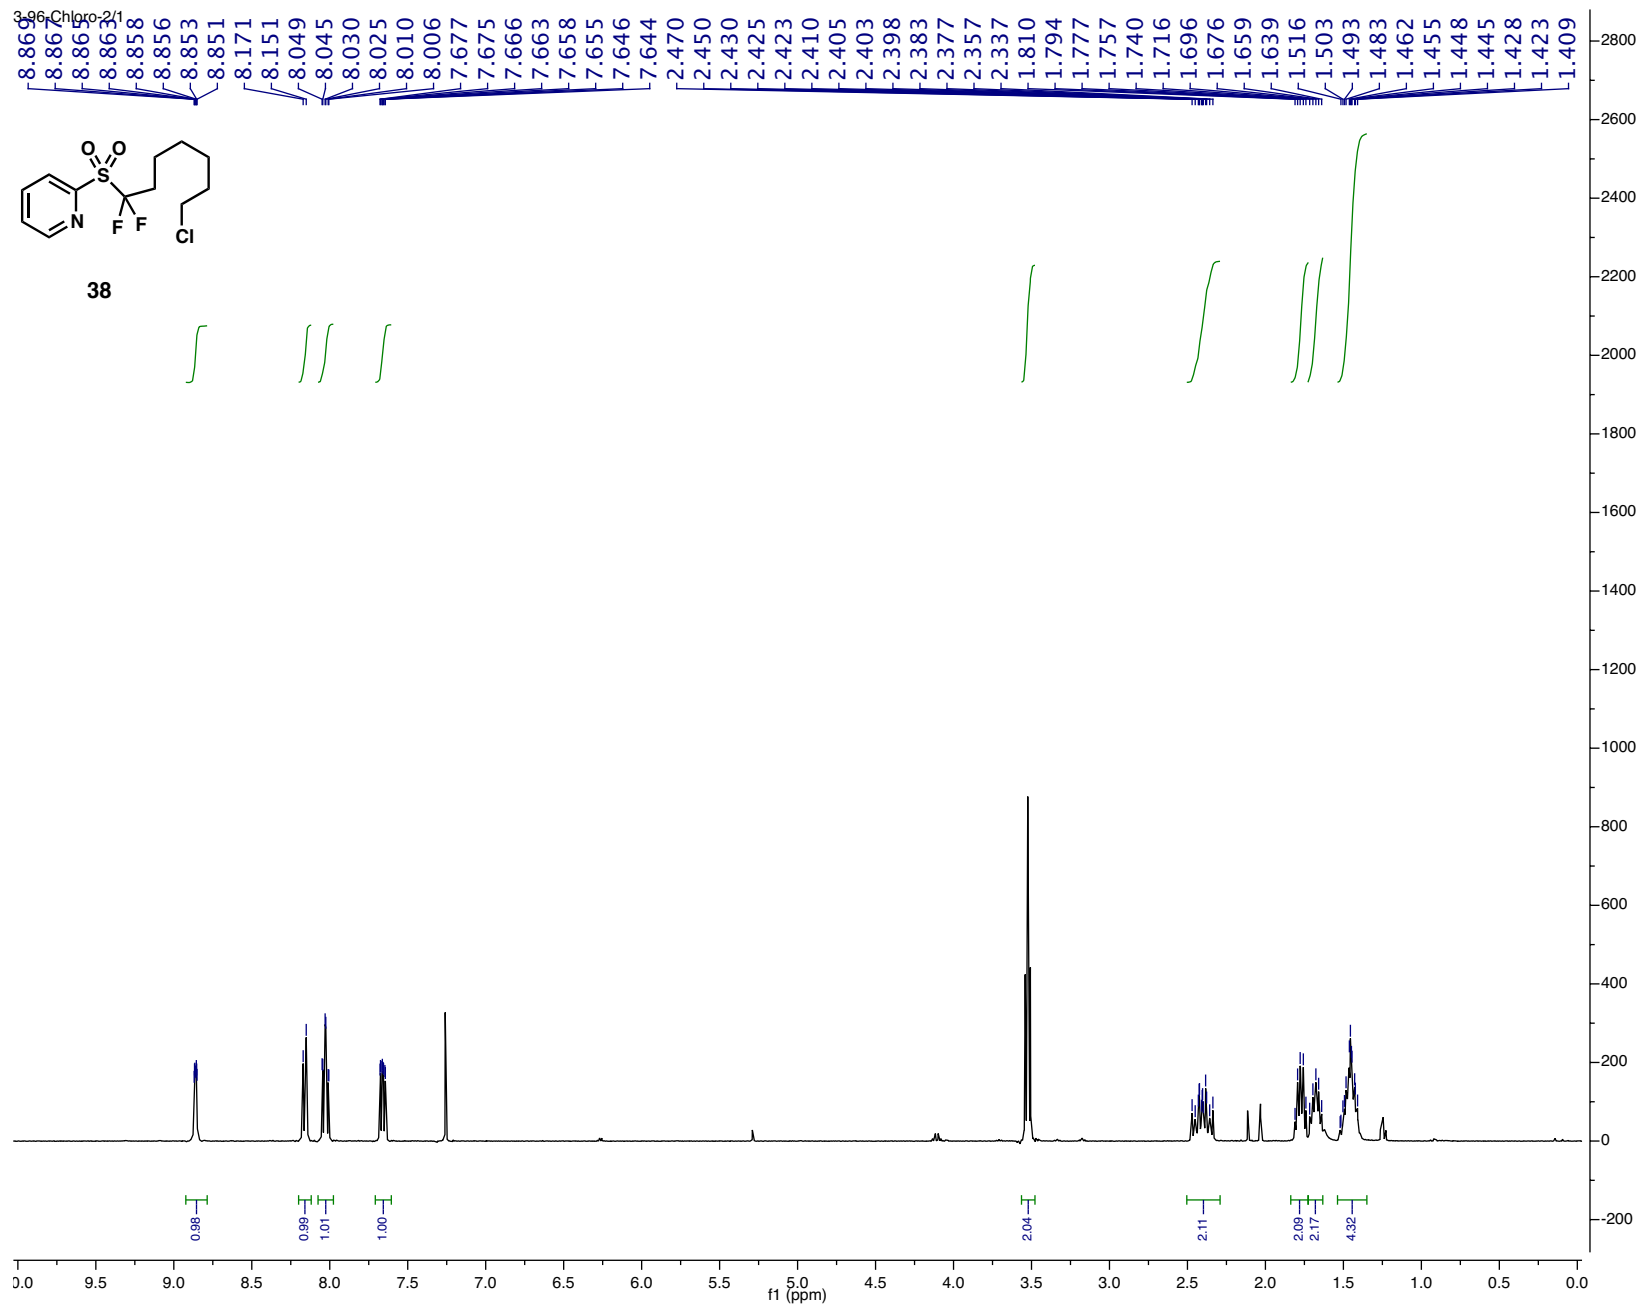

3-96-chloro-2-13C-RE/1  
C-13 Routine 1D, DCH CryoProbe, 10-26-2006

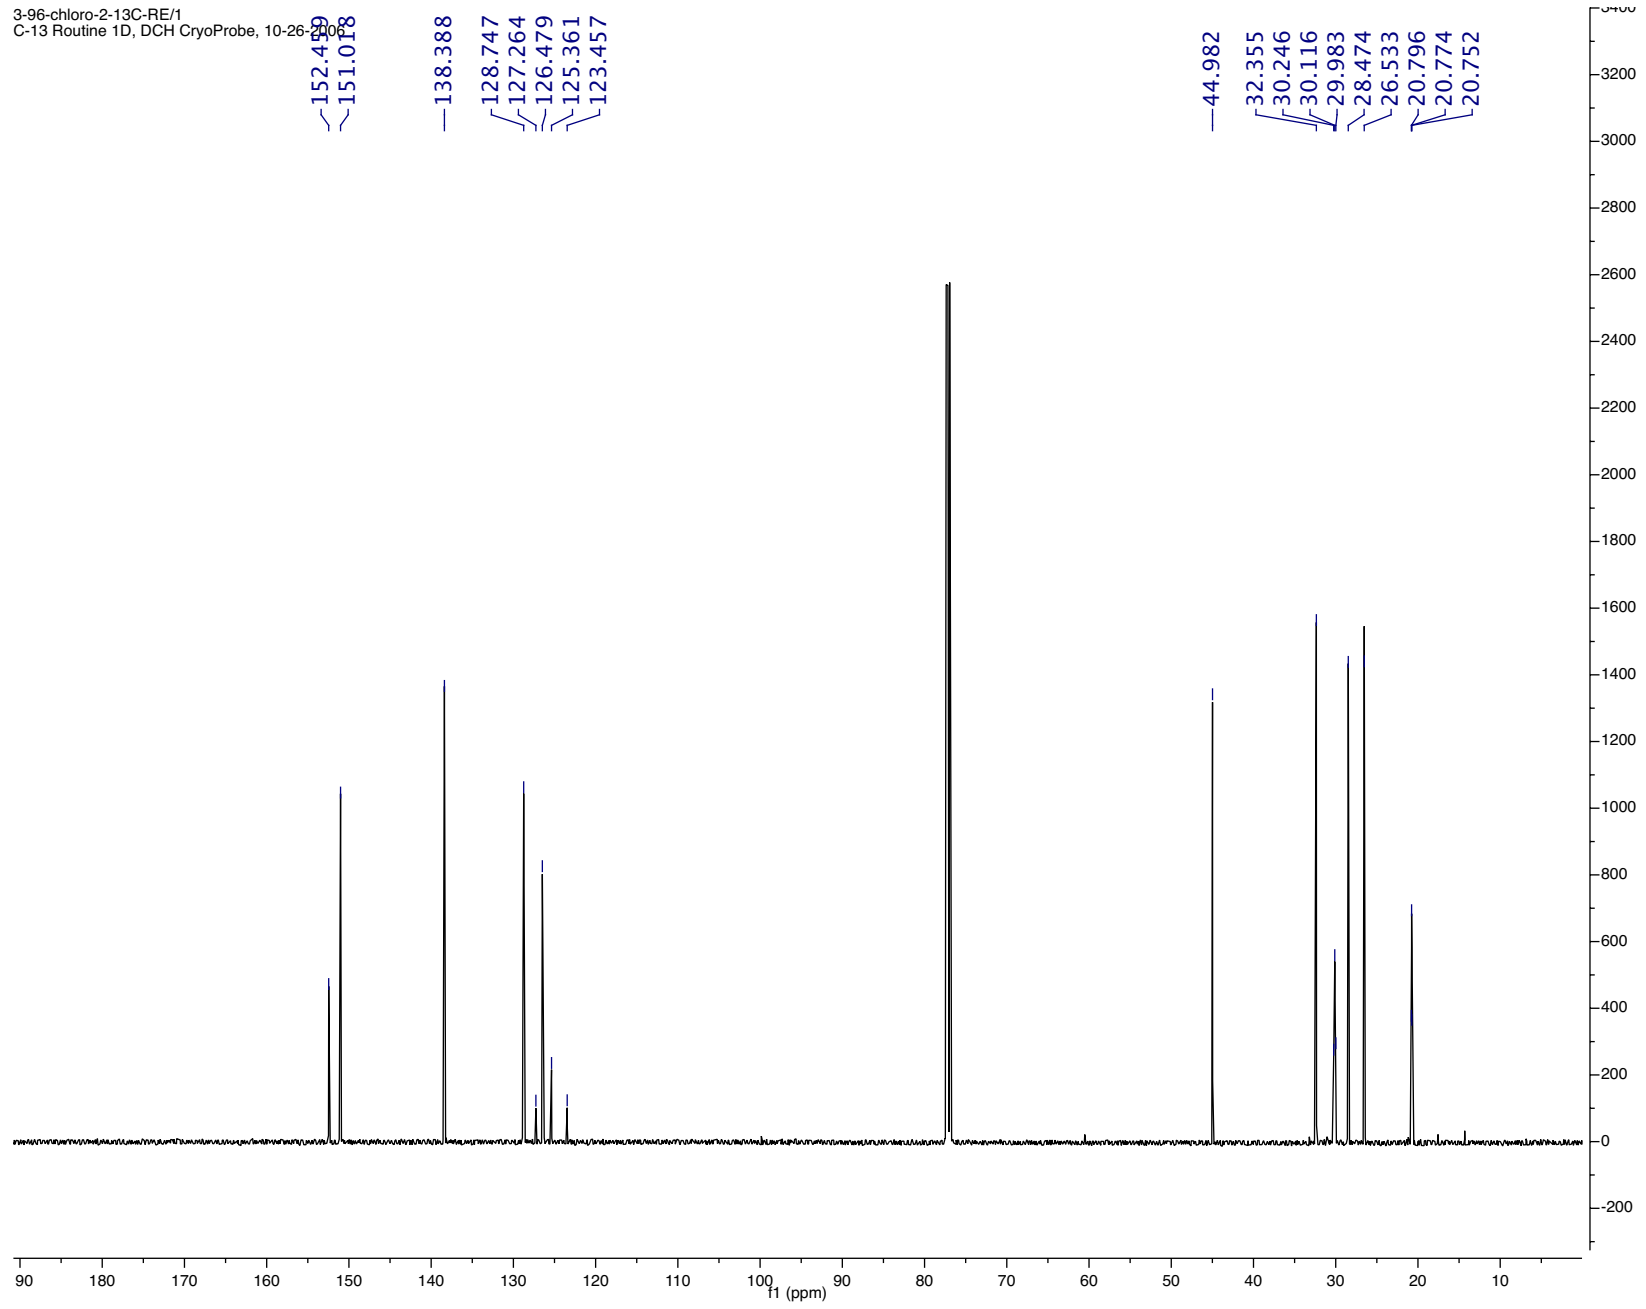

SI-136



3-96-Chloro-2-F/1  
F-19, CDCl<sub>3</sub>, DPX-400 QNP Probe. CF<sub>3</sub>Cl as Ref at 0 ppm.

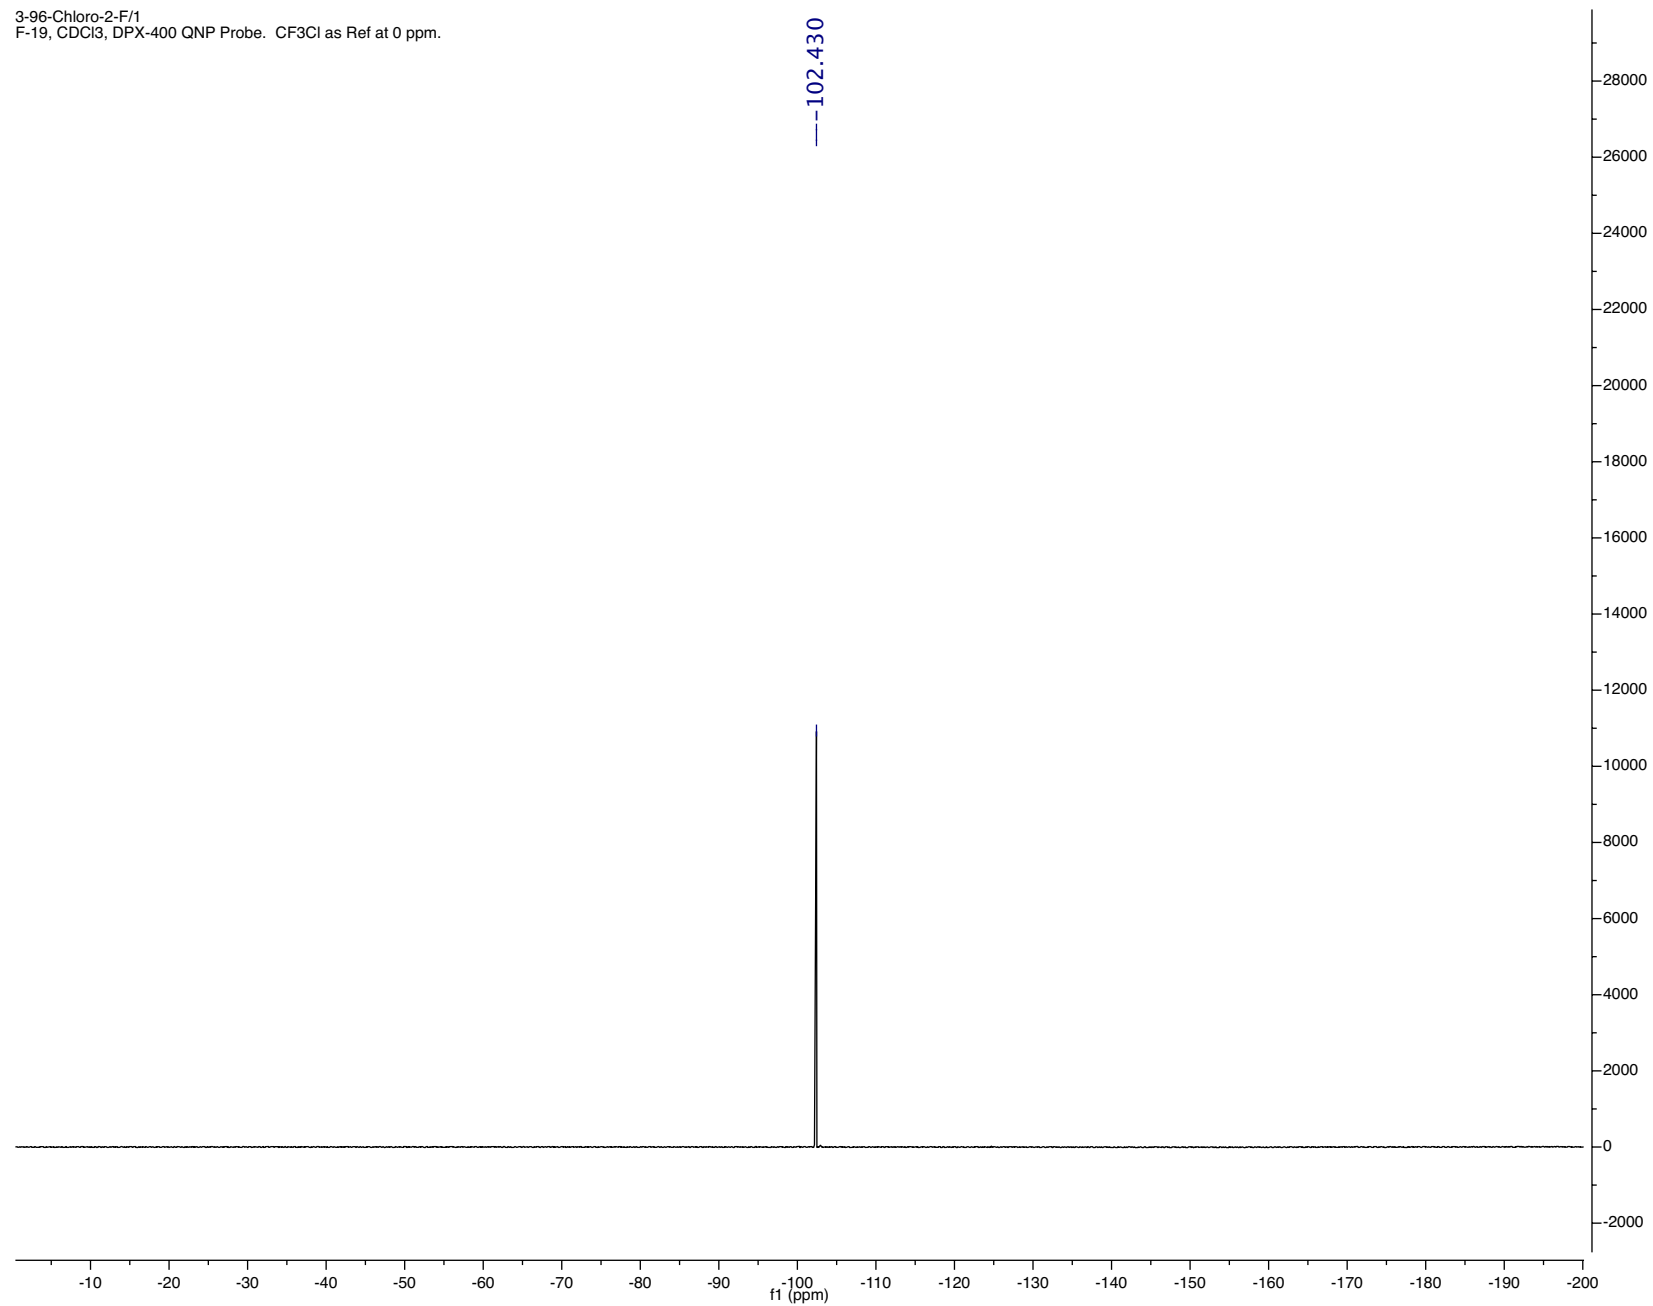

SI-137

3-106-salt-redissue-2/999  
H-1 Routine 1D experiment. BBO Probe, 9-13-2007

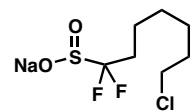

40

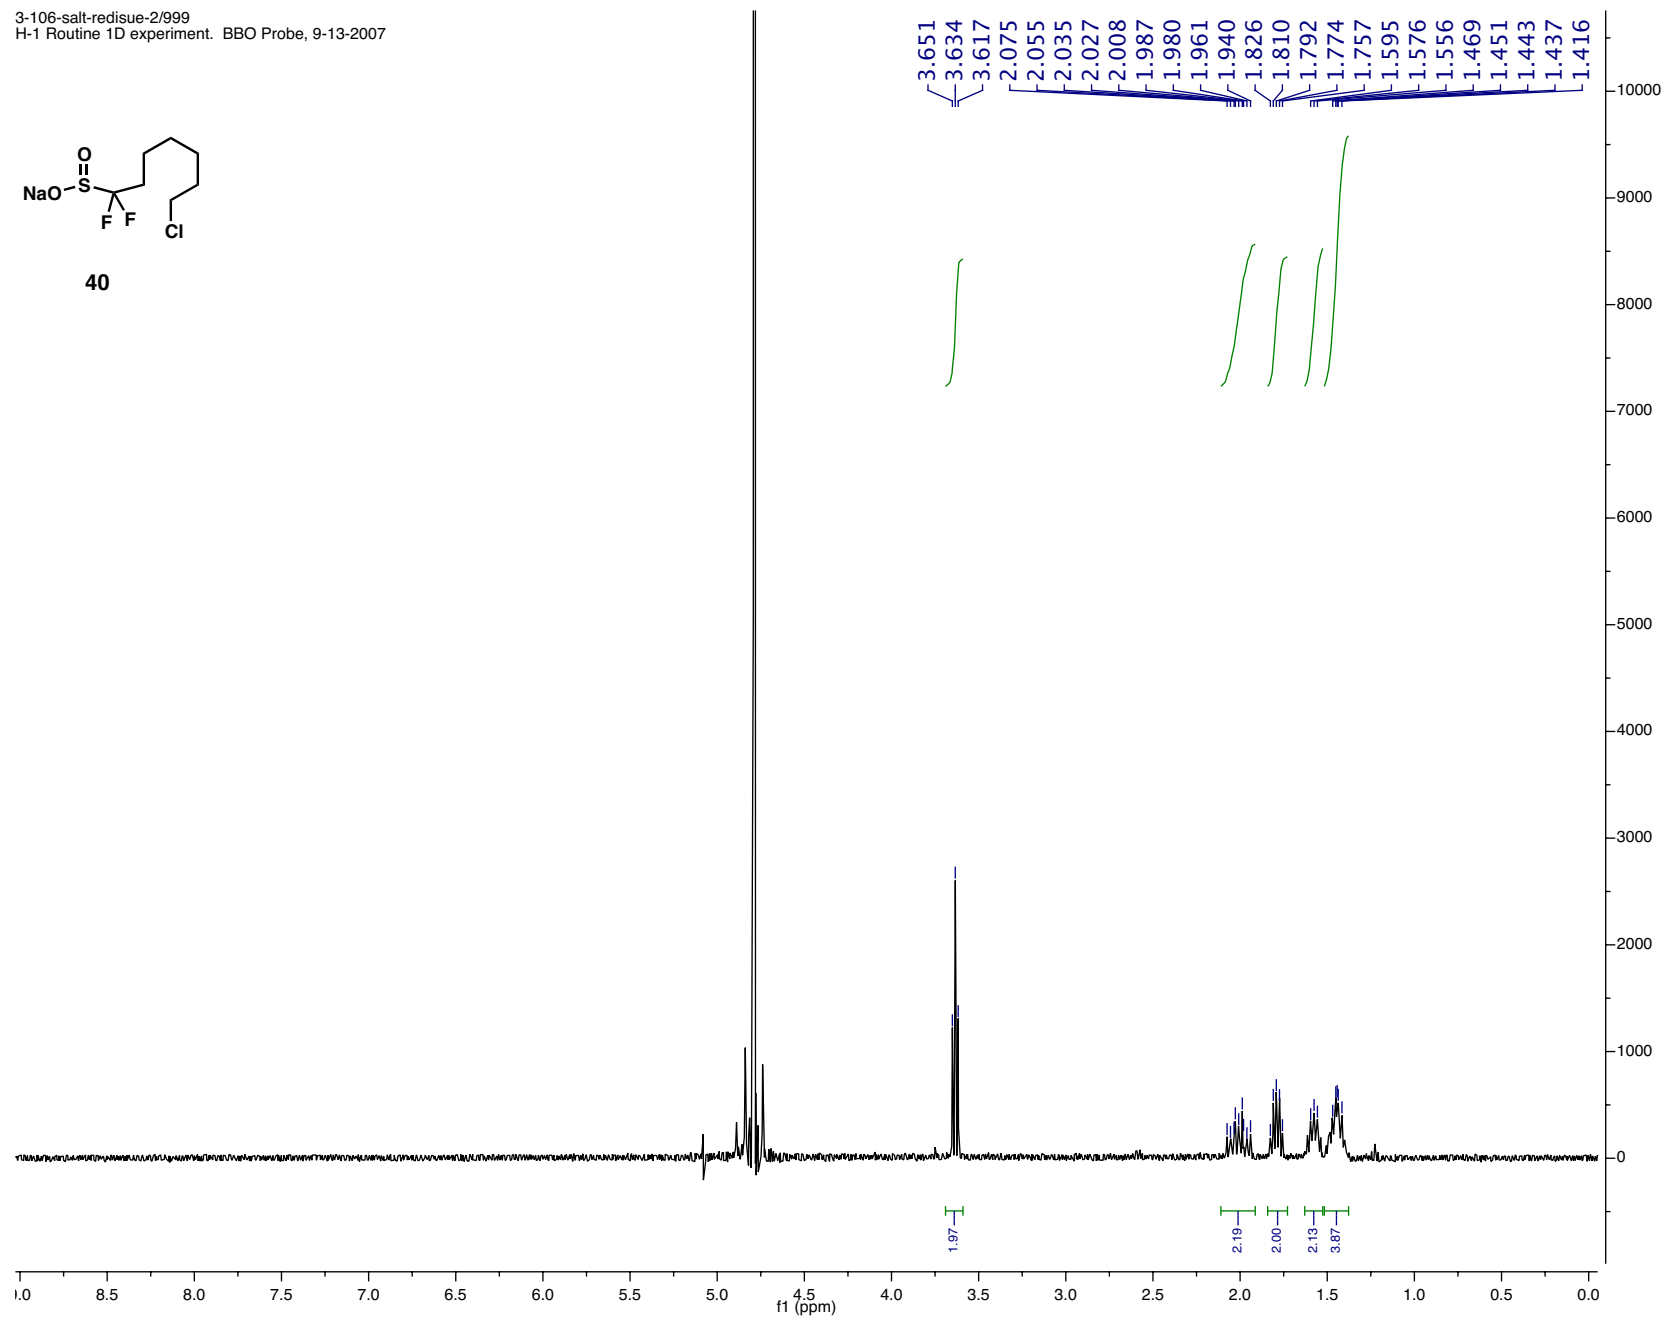

SI-138

3-106-salt-13C/1  
C-13 Routine 1D, DCH CryoProbe, 10-26-2006

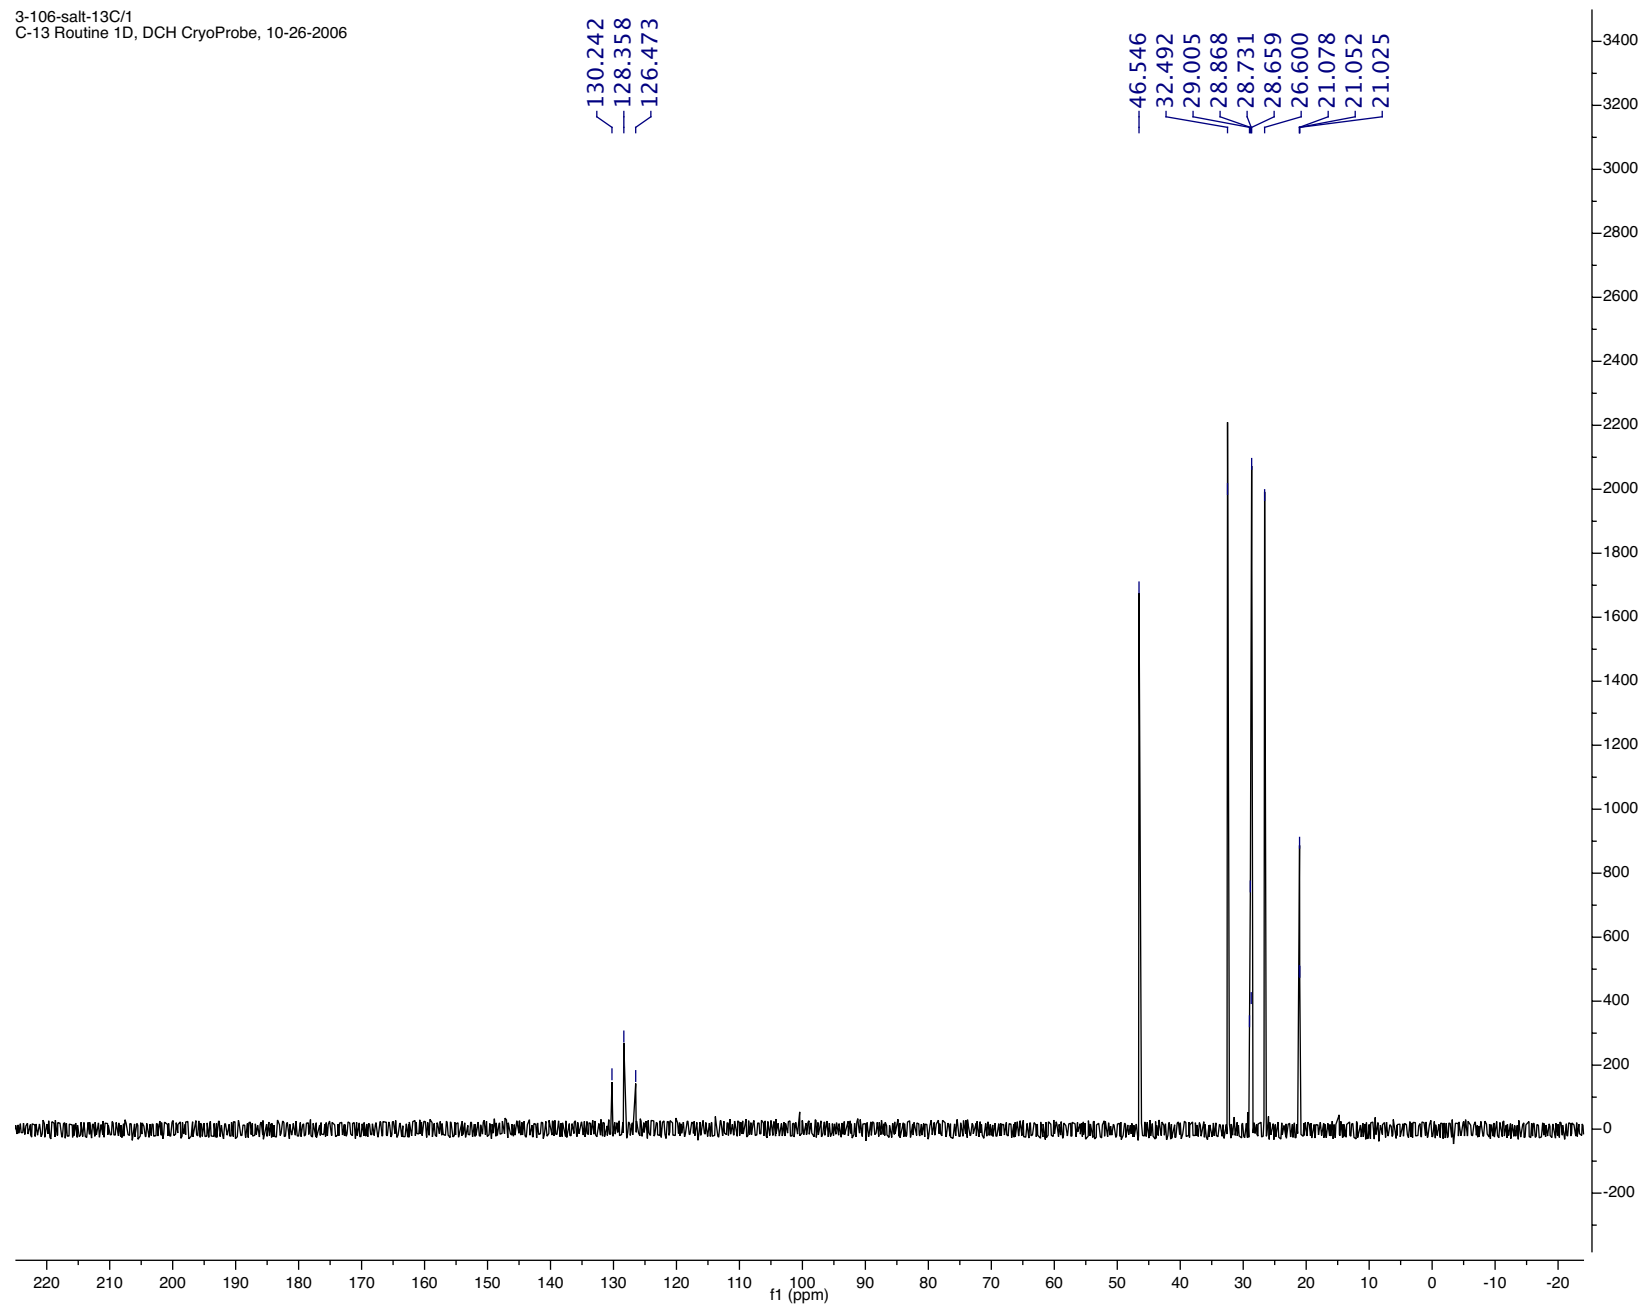

SI-139

3-106-p-F/1  
F-19, D2O, DPX-400 QNP Probe. CF3Cl as Ref at 0 ppm.

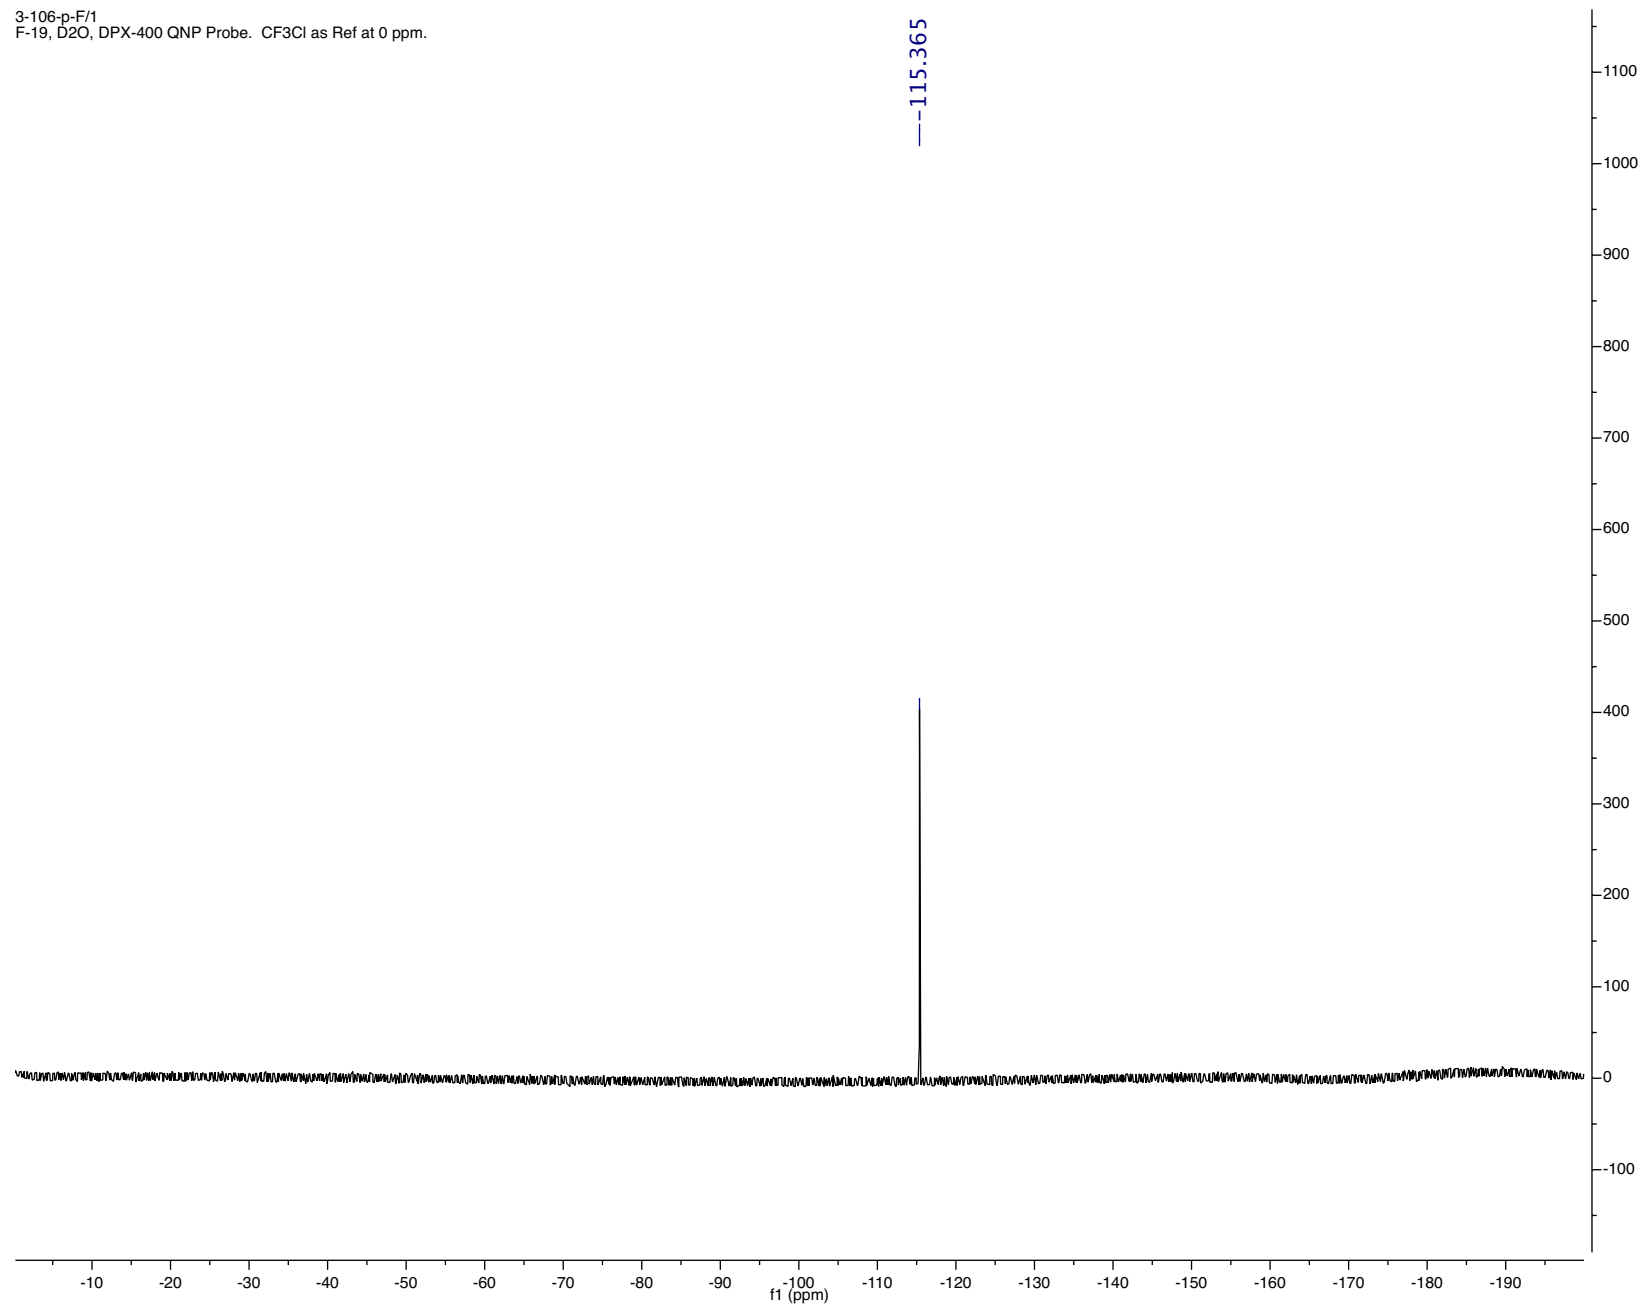

SI-140

AR-277-2col.1.fid  
H-1 Routine 1D, DCH CryoProbe, 1-13-2006

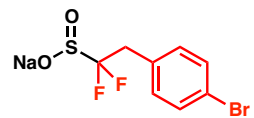

41

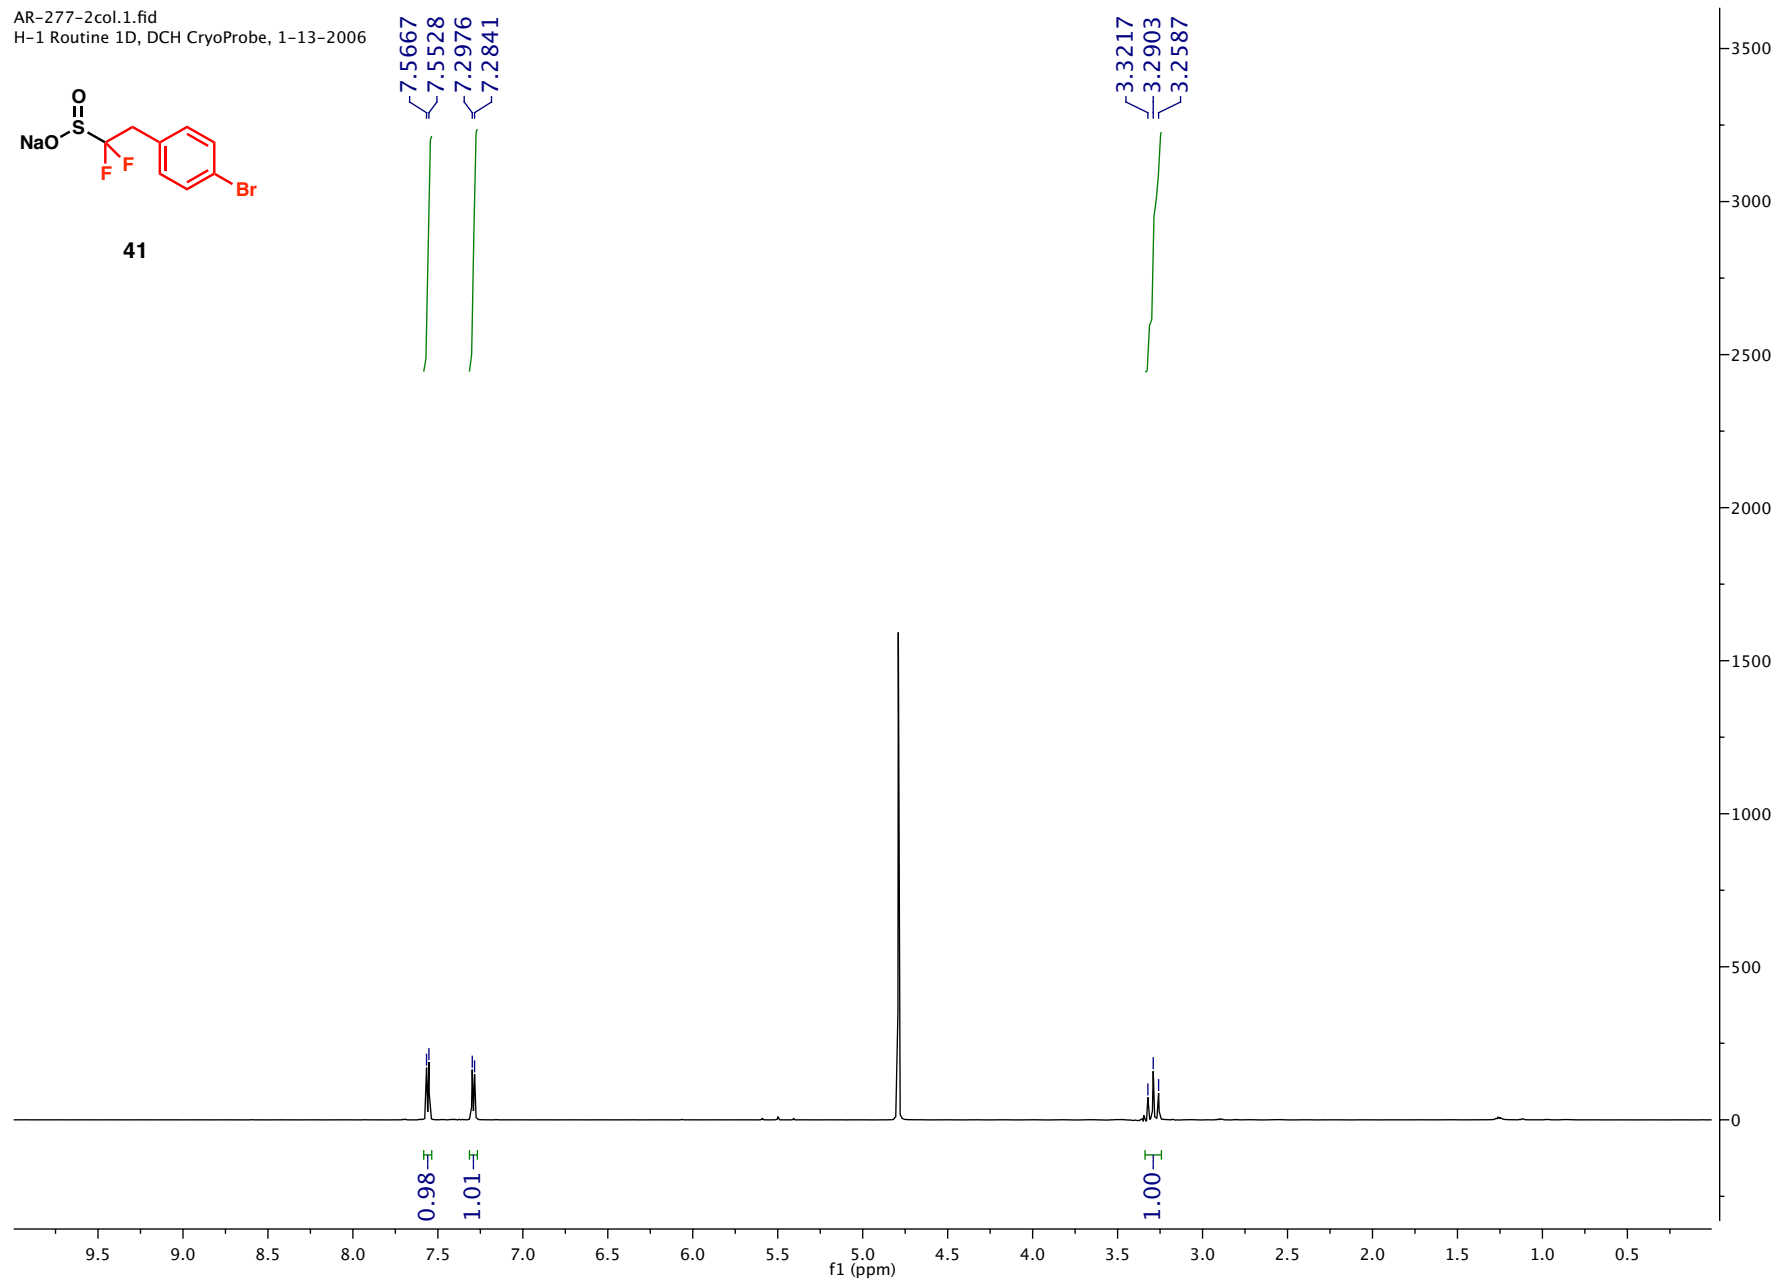

SI-141

AR-277-2colC13.1.fid  
C-13 Routine 1D, DCH CryoProbe, 10-26-2006

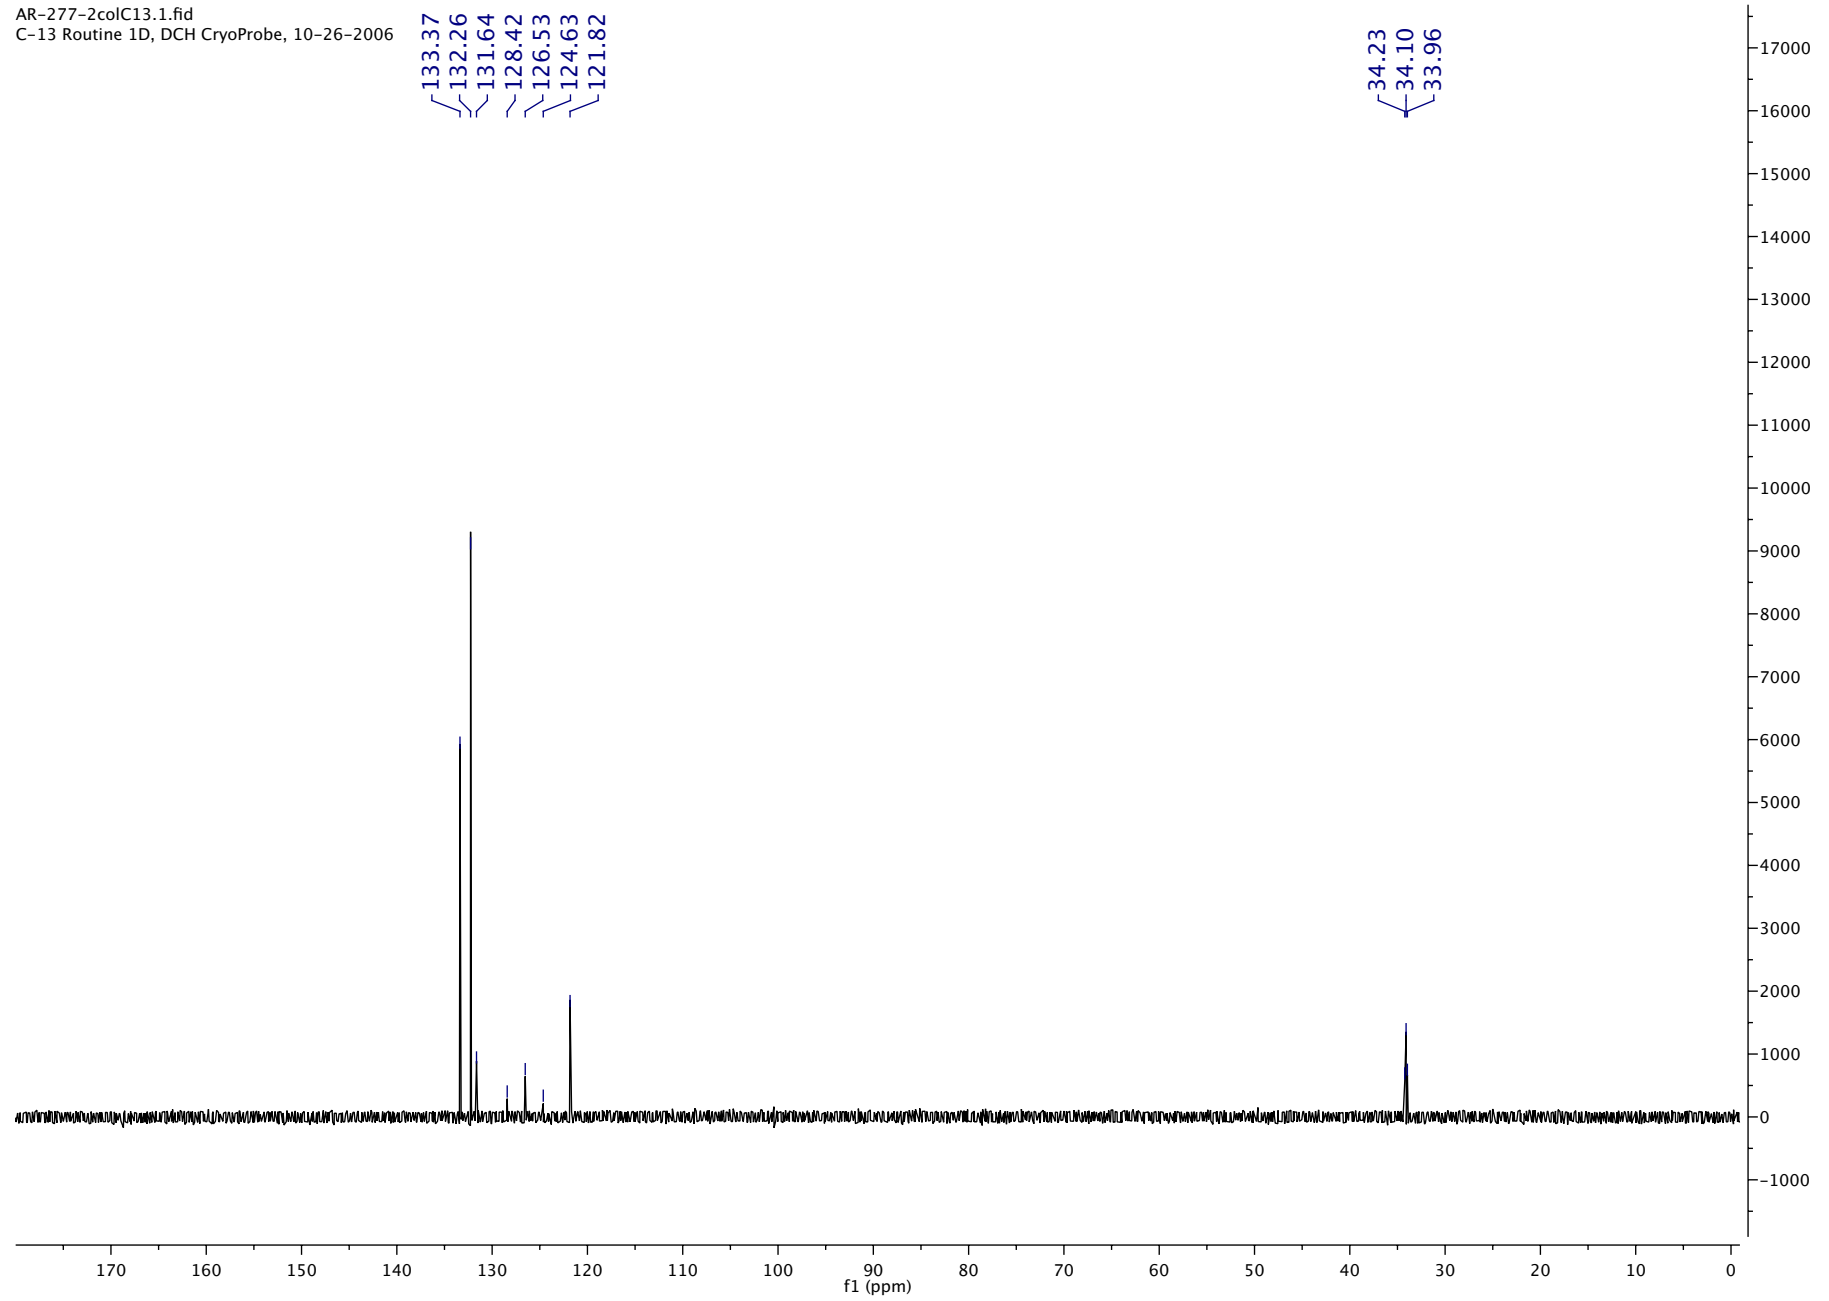

SI-142

AR-277-F.999.fid  
F-19/D2O, Ref with CCl3F, 10-30-2012

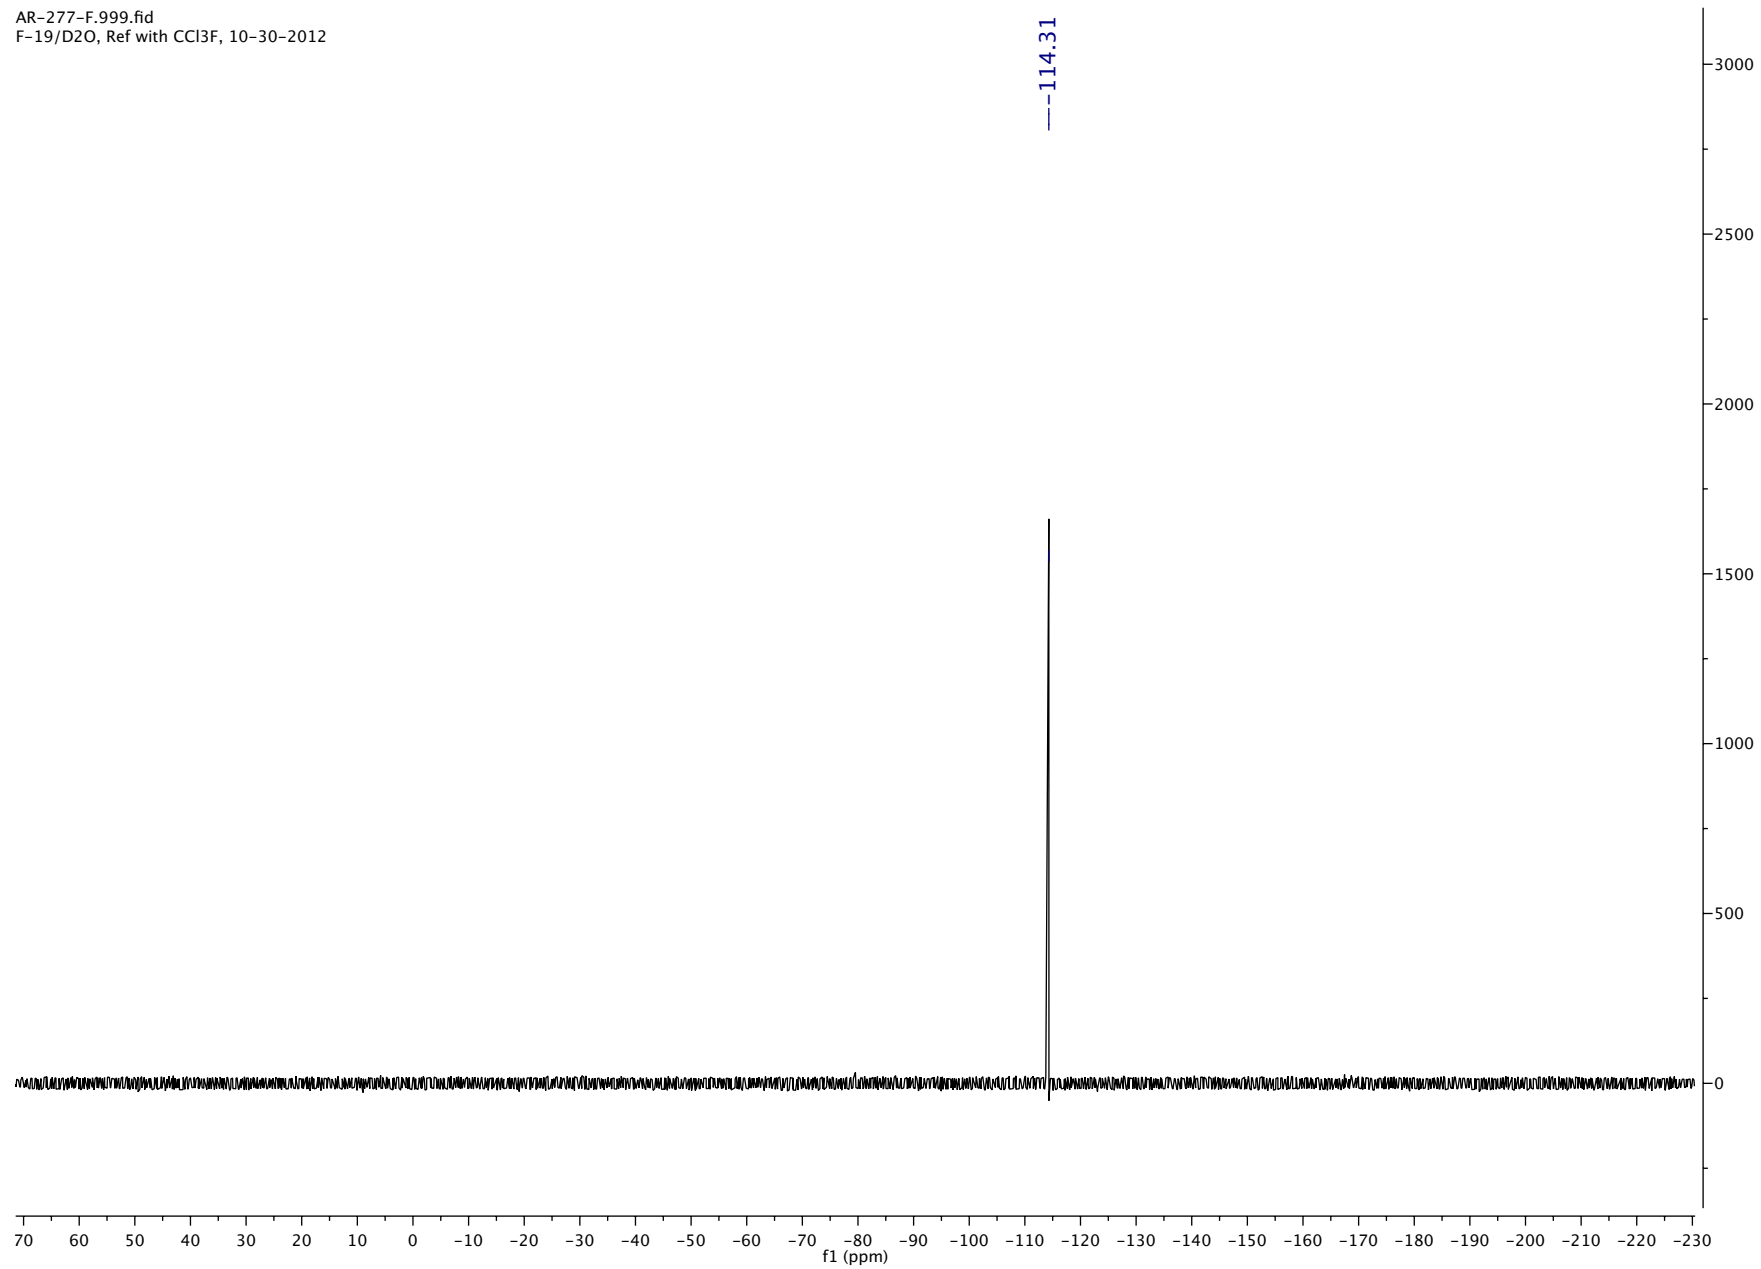

SI-143

3-109-quinoxaline-p-H/999  
H-1 Routine 1D experiment

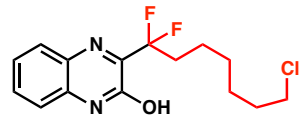

42

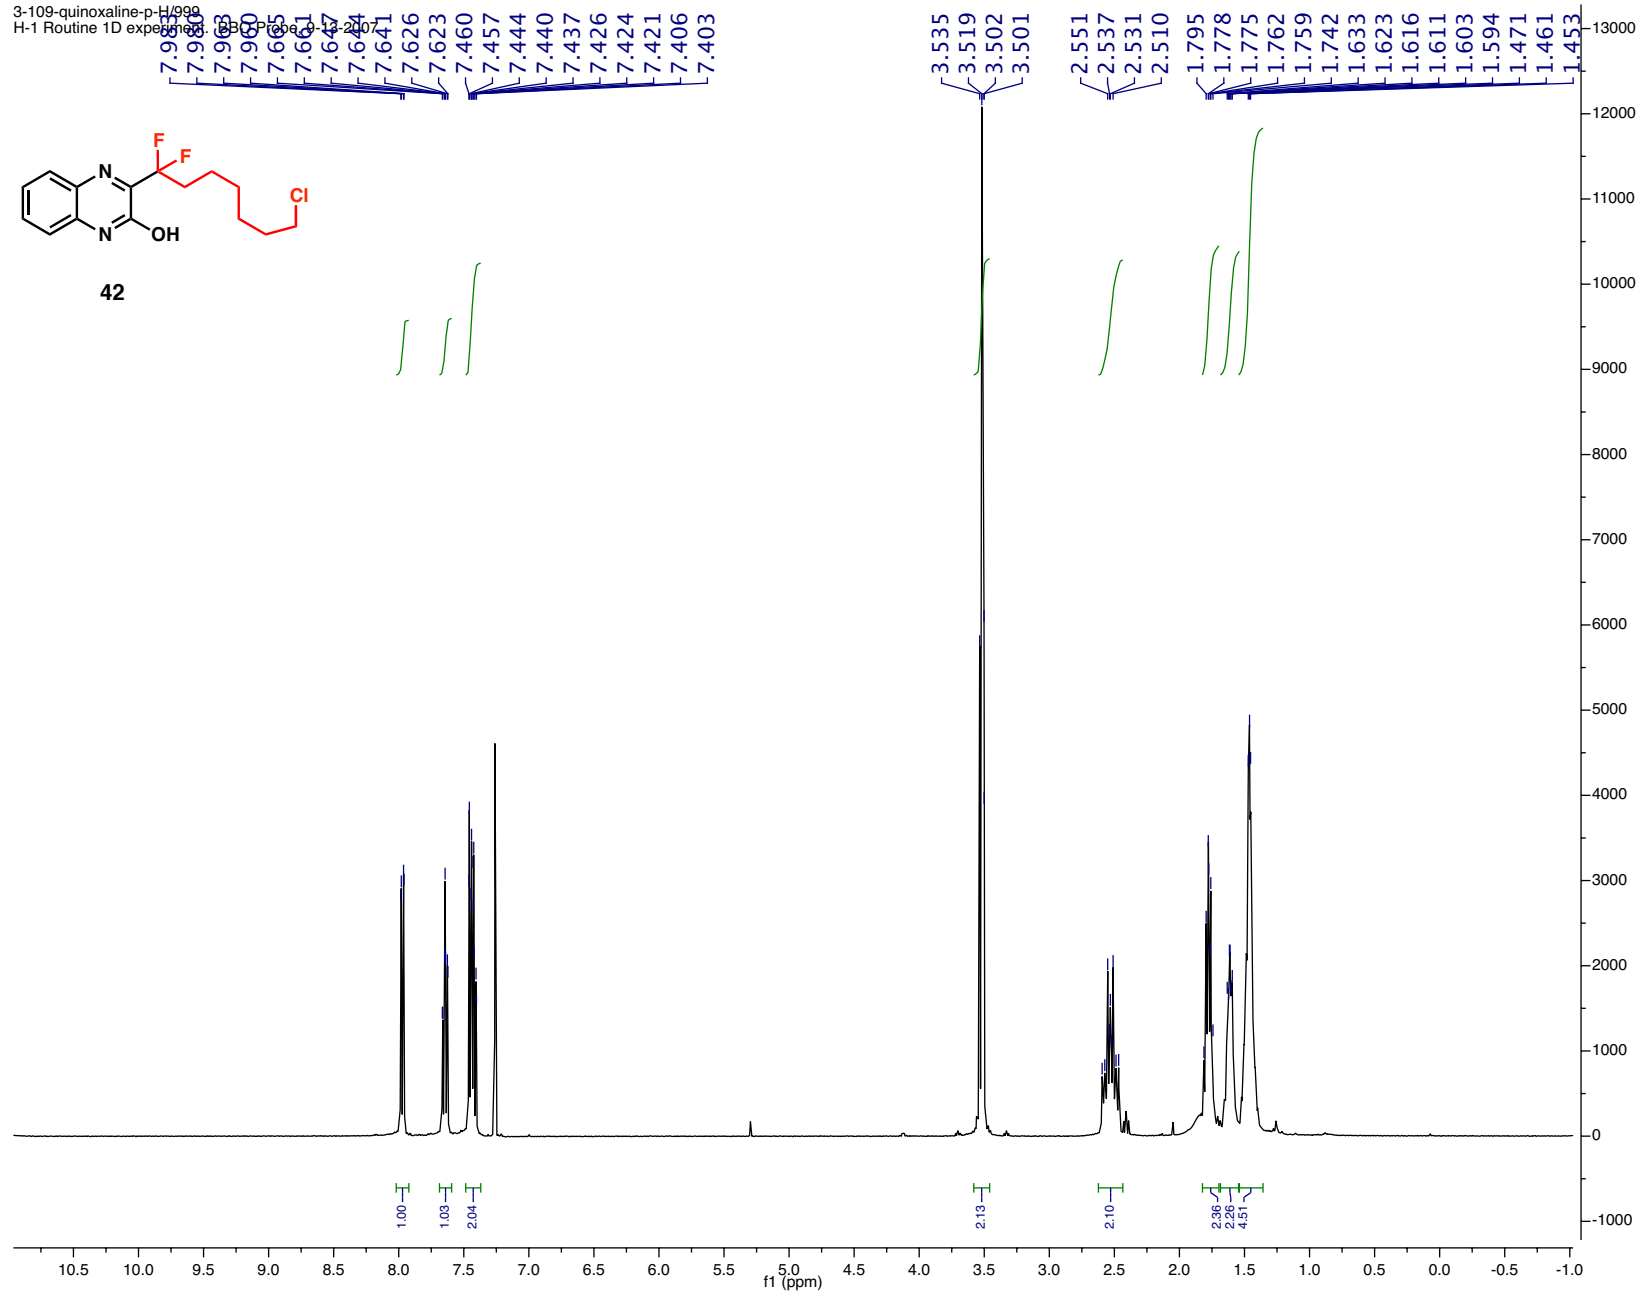



QZ/1  
C-13 Routine 1D, DCH CryoProbe, 125

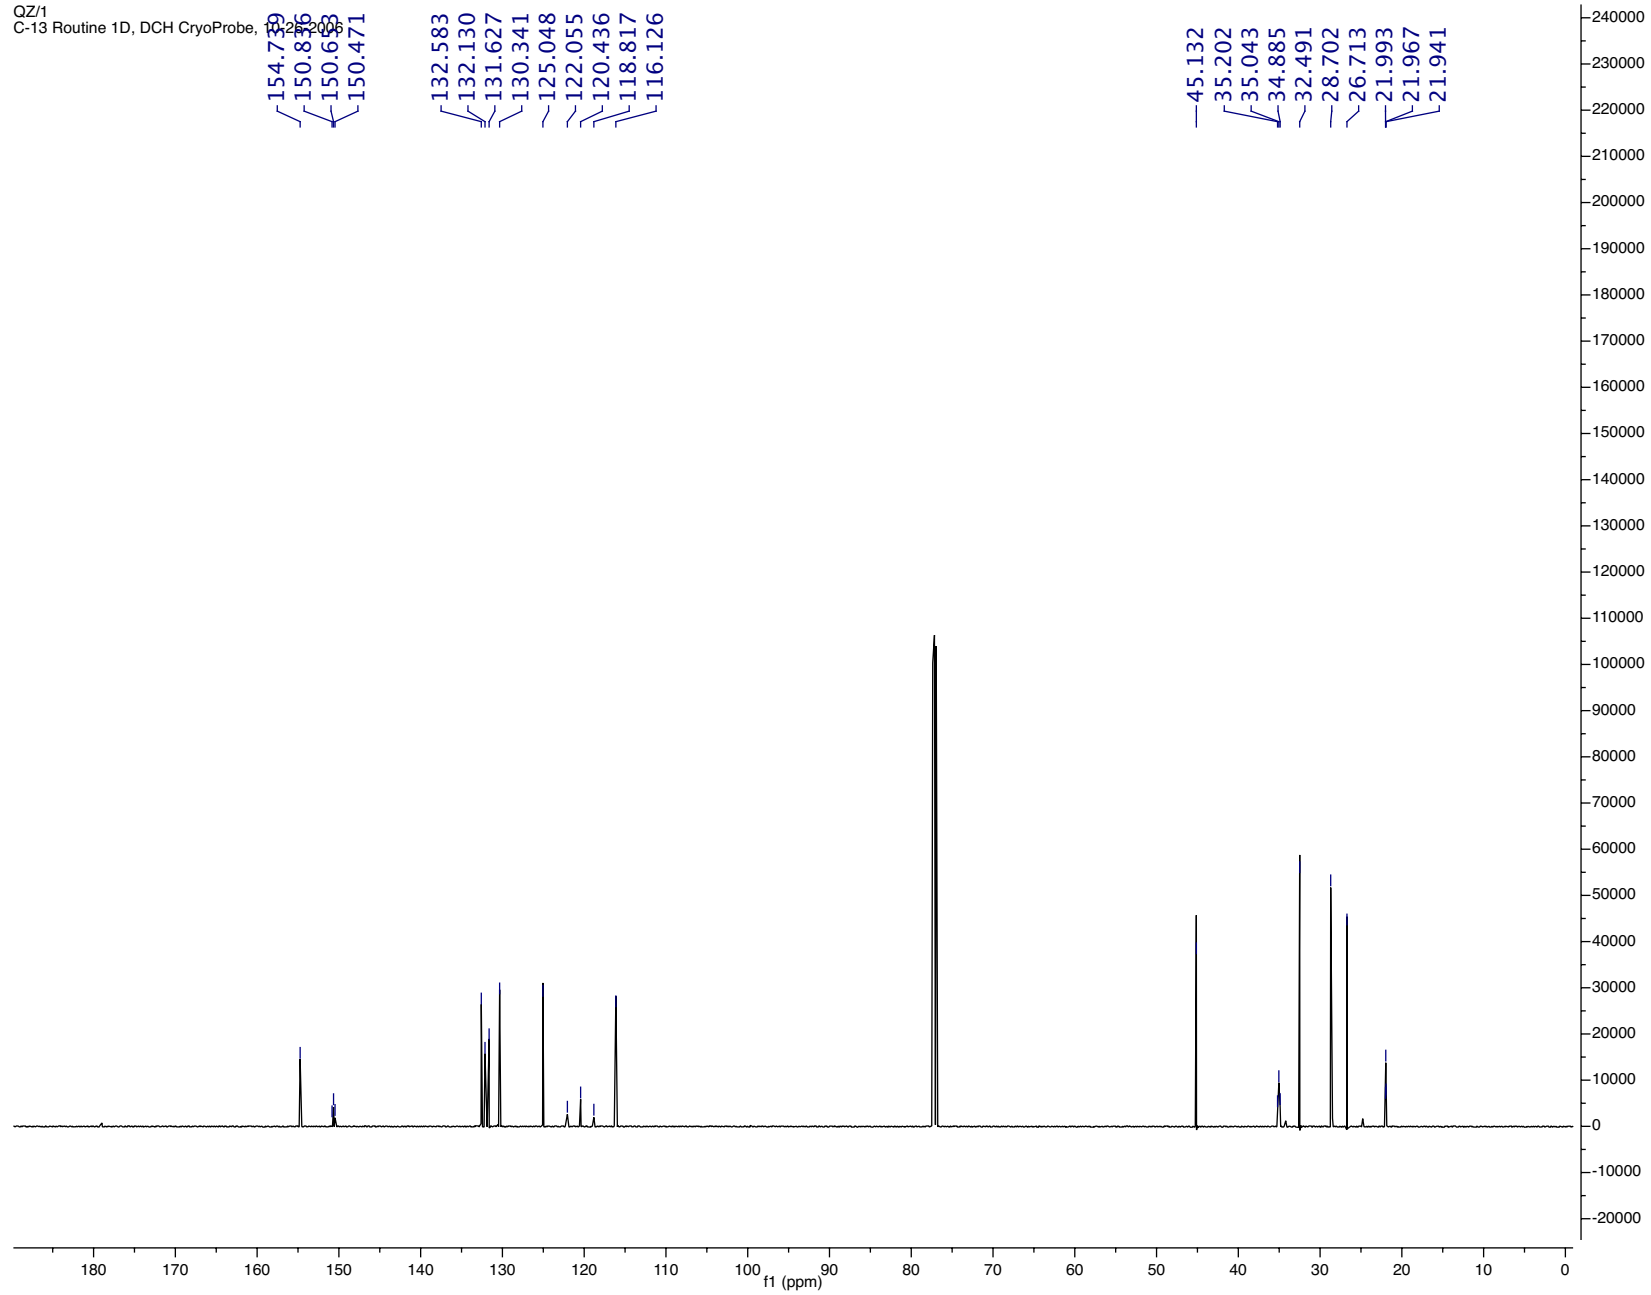

SI-145

3-107-quinoxal-2-F/1  
F-19, CDCl<sub>3</sub>, DPX-400 QNP Probe. CF<sub>3</sub>Cl as Ref at 0 ppm.

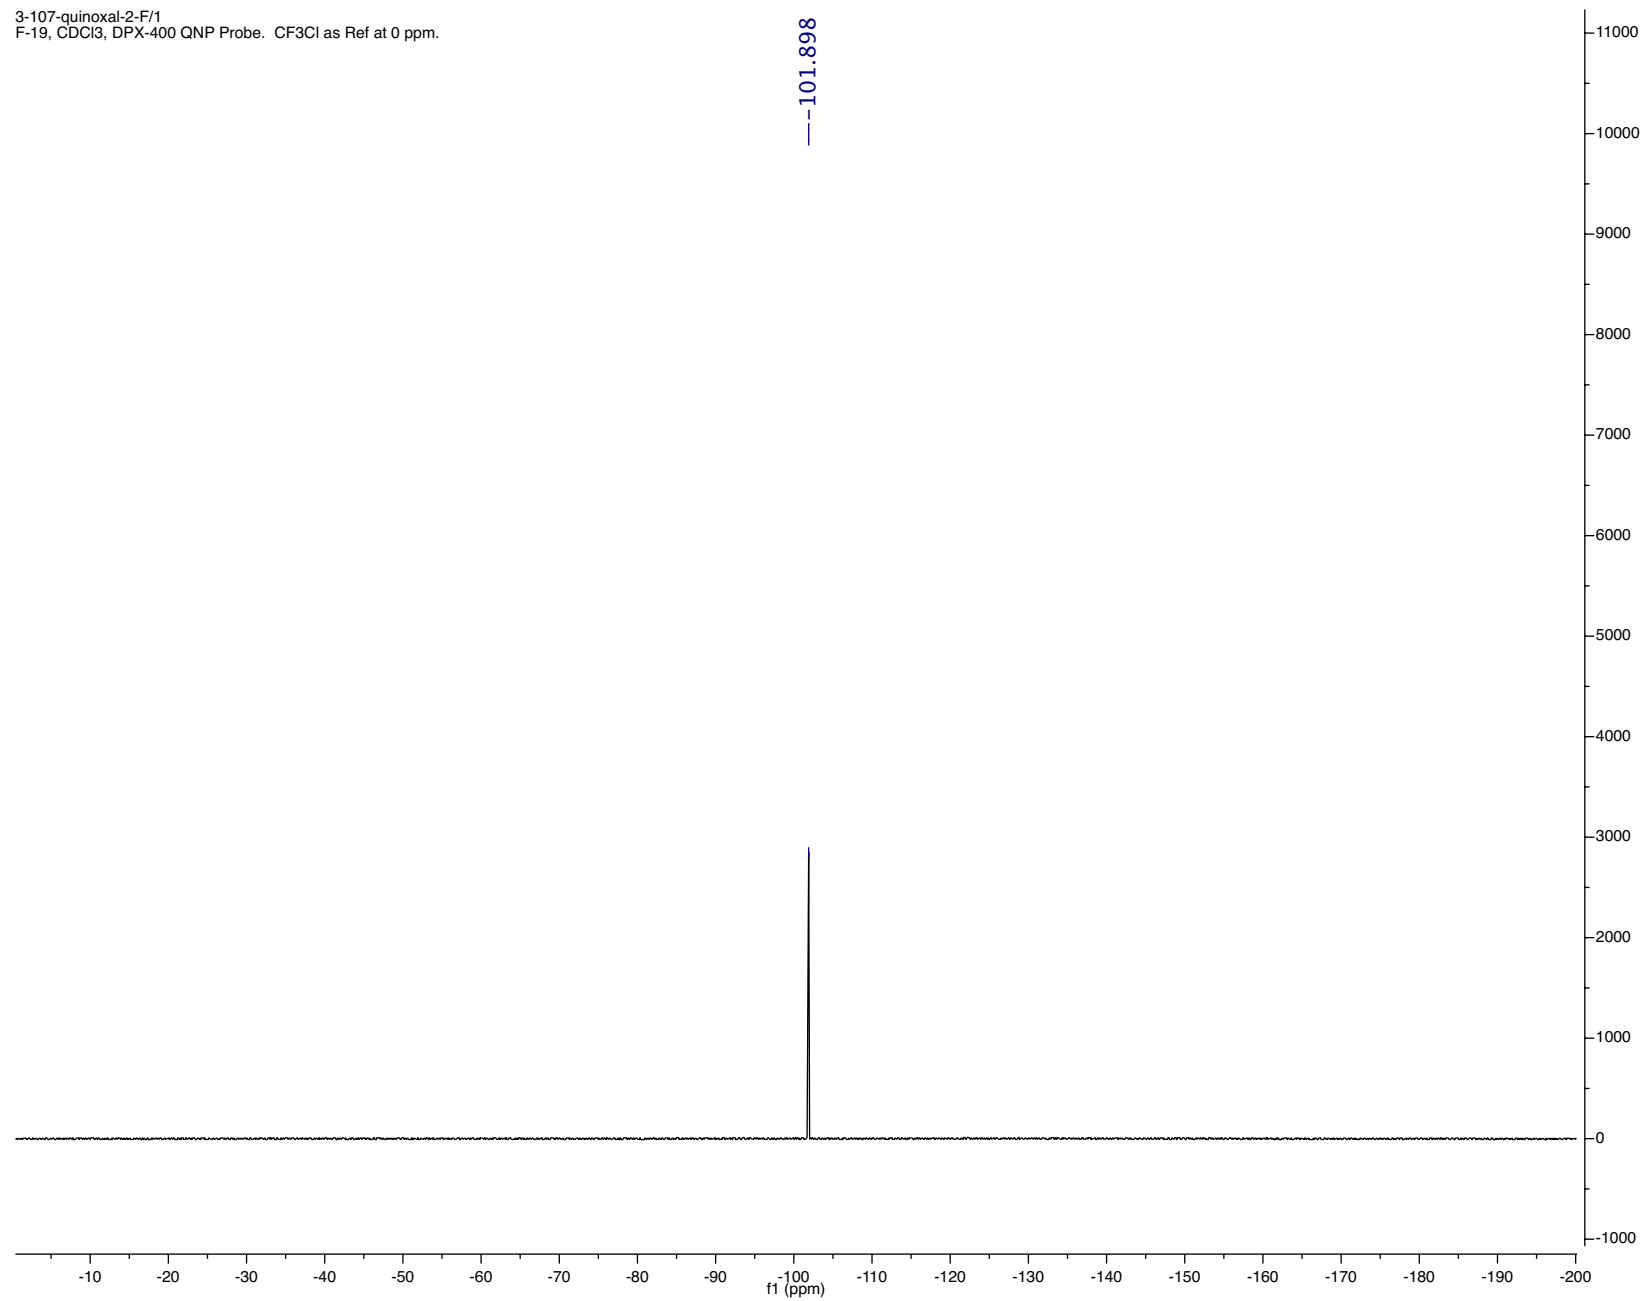

SI-146

AR-283-4H1.fid  
H-1 Routine 00000000

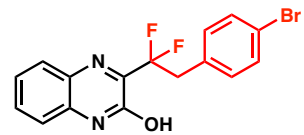

43

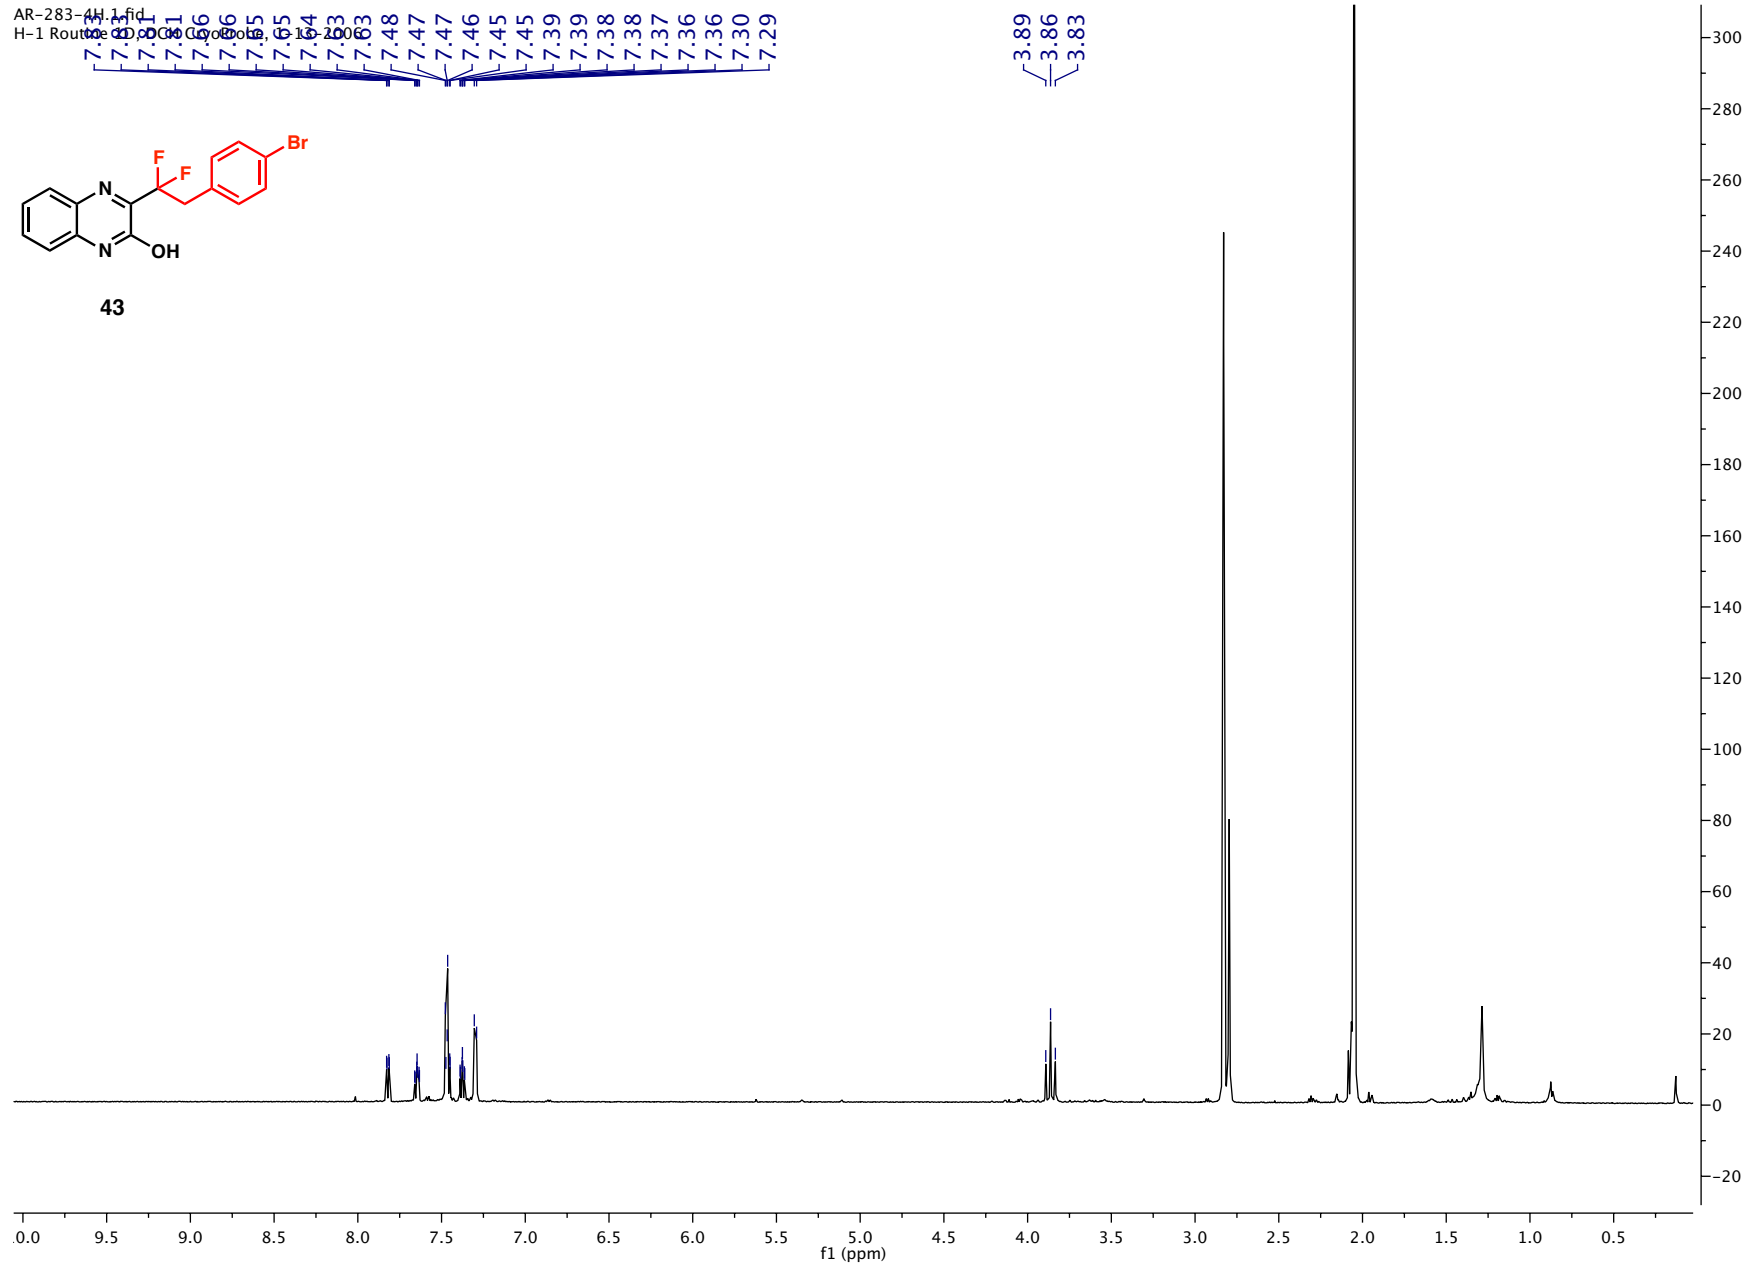

AR-284-4C13.1.fid  
C-13 Routine 1D, DCH CryoProbe, 10-26-2006

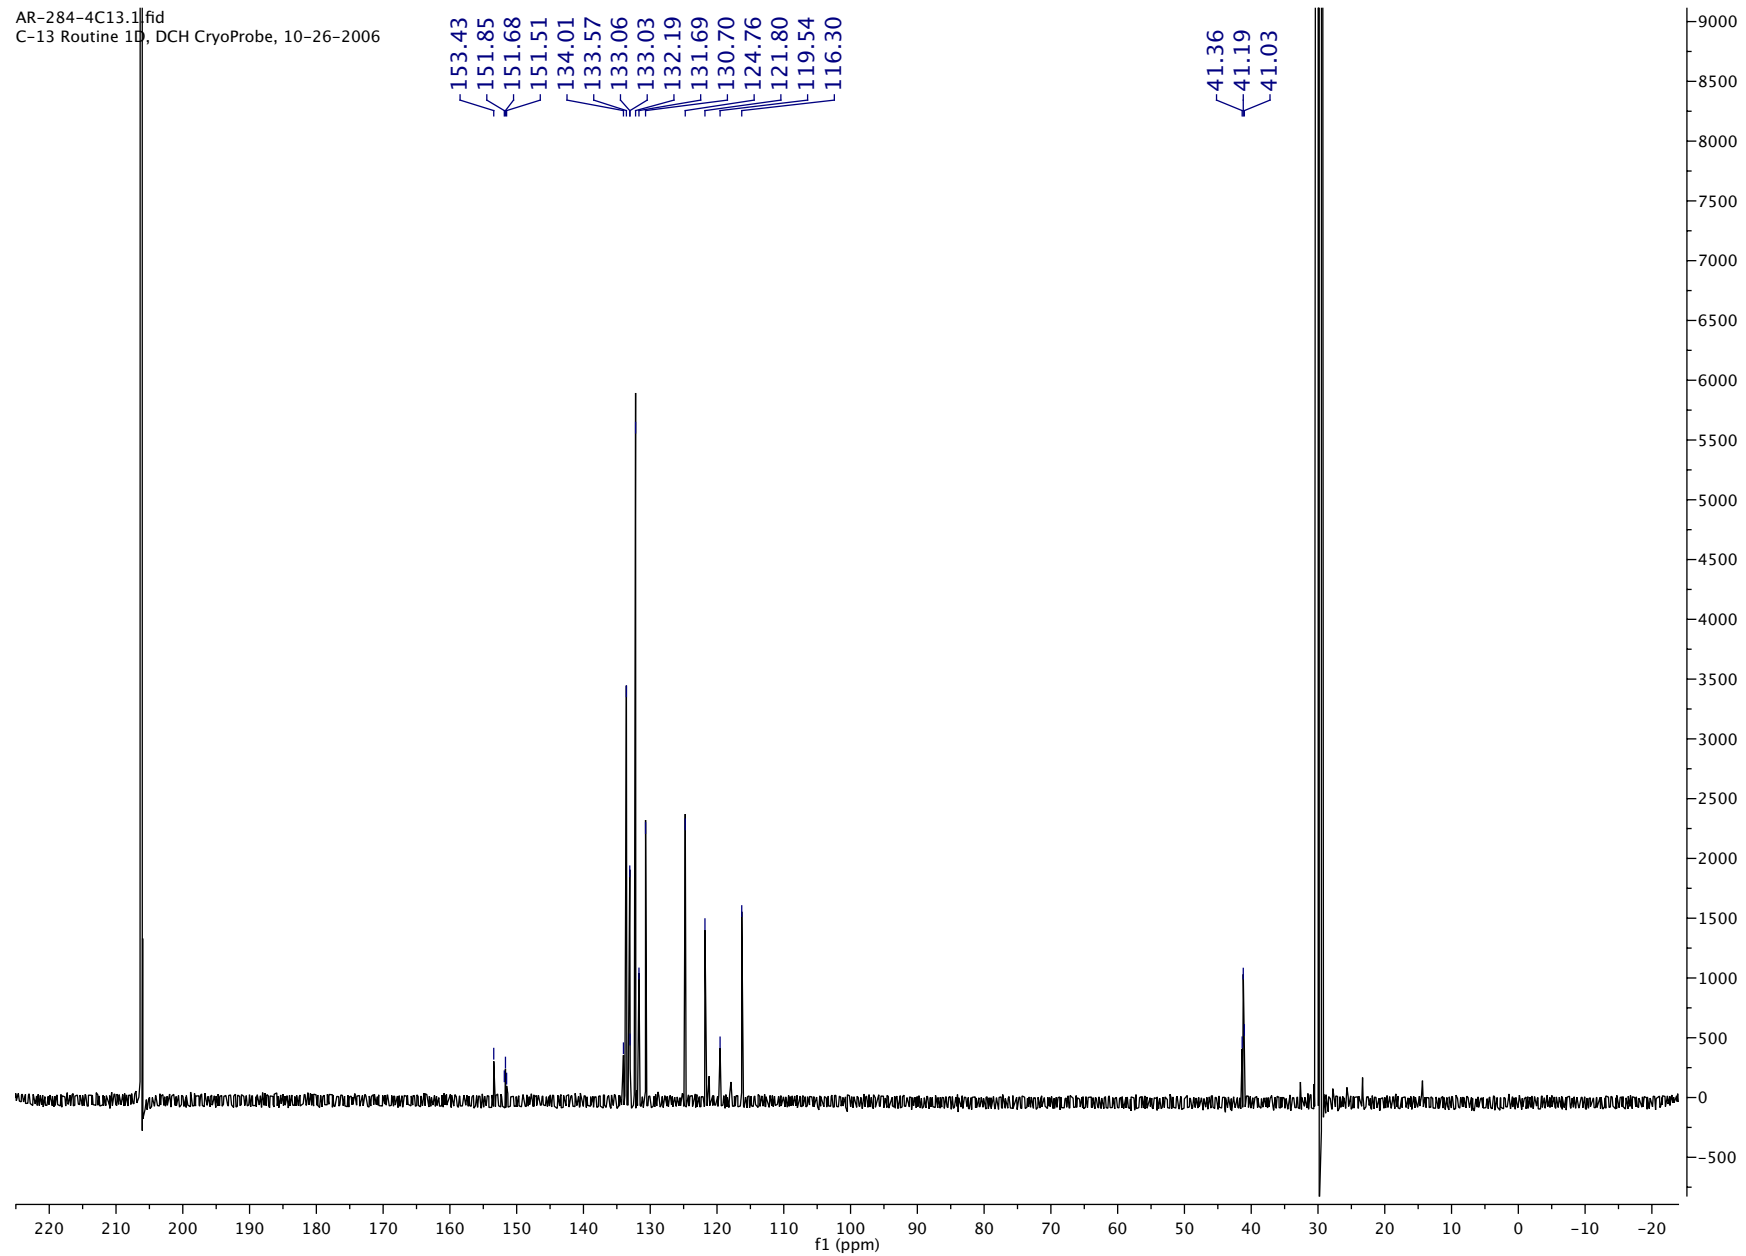

AR-284-F.1.fid  
F-19/ACETONE, Ref with CCl3F

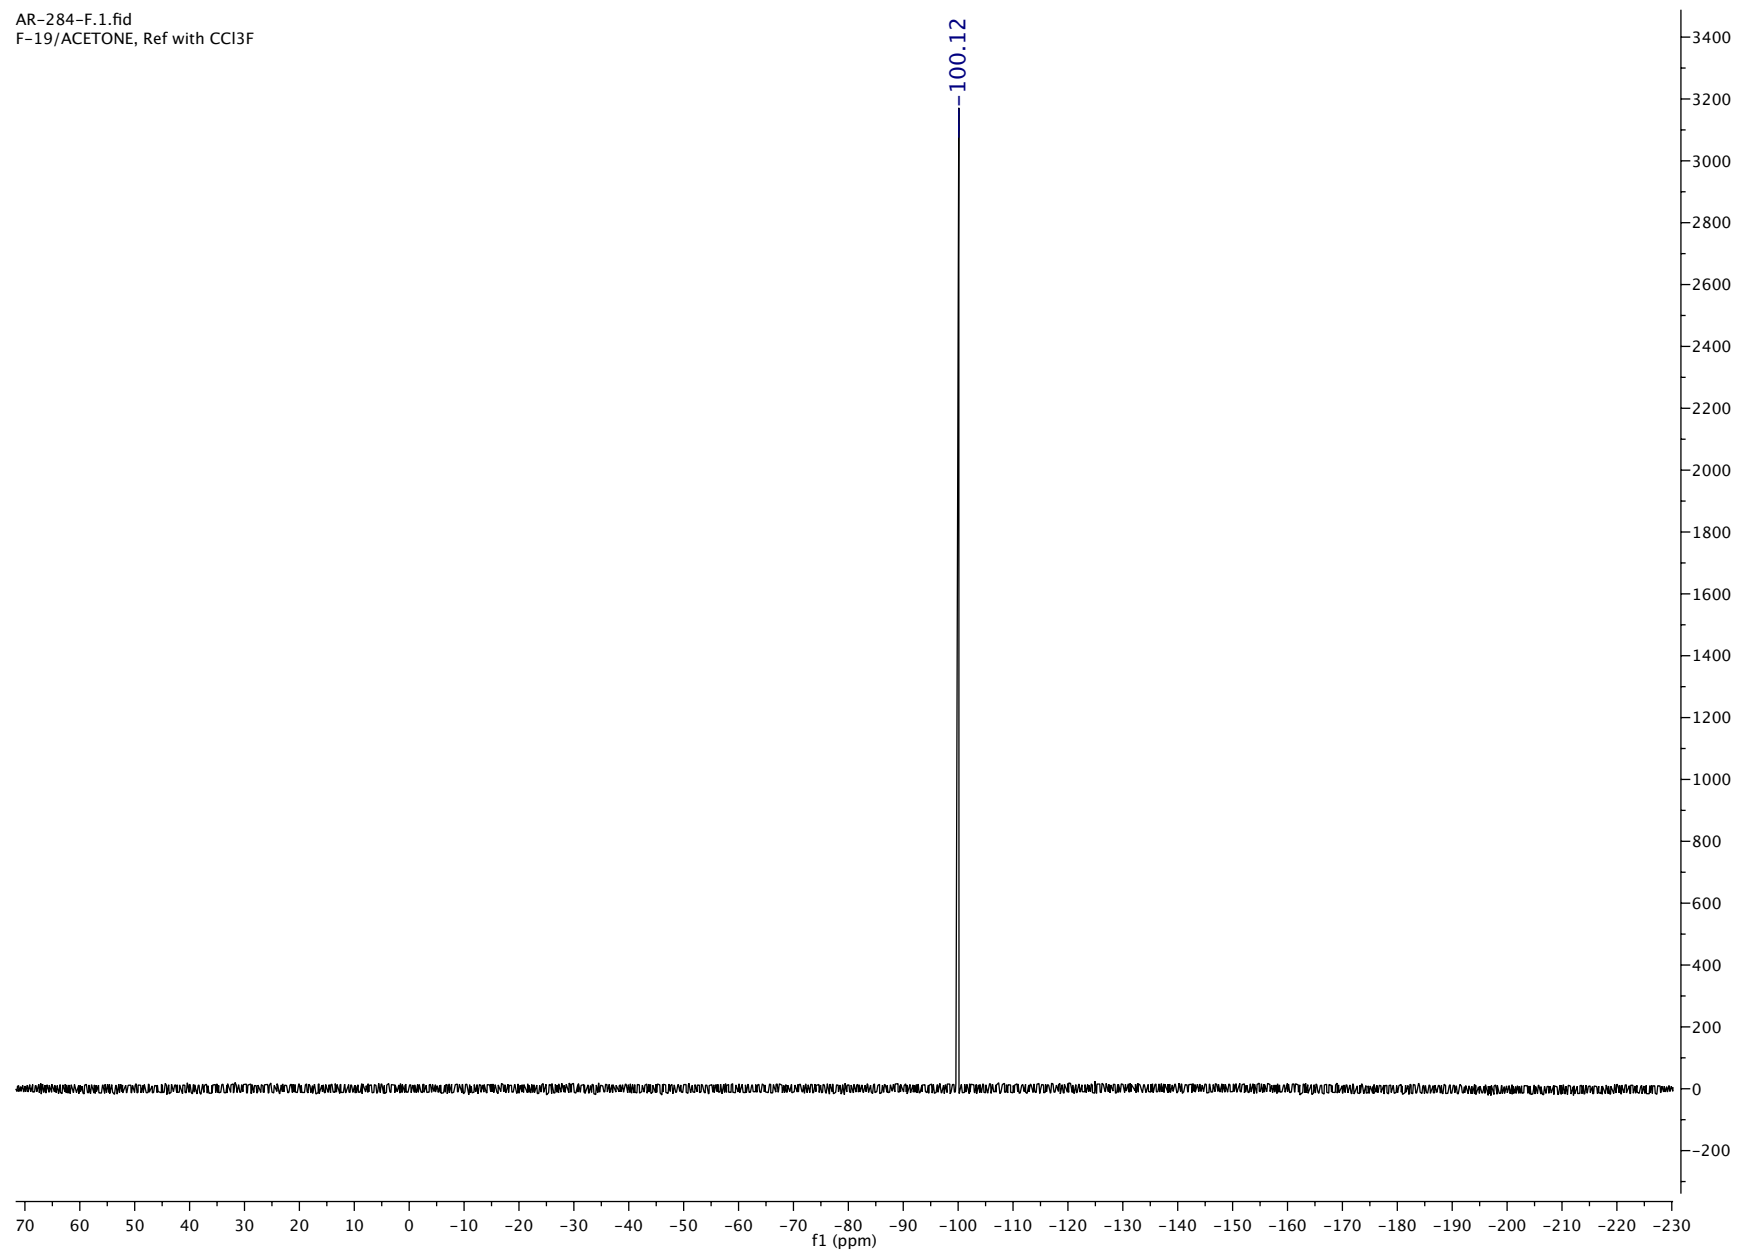

SI-149
